# Supplementary material for: Stereoselective formation of chiral trans-4-hydroxy-5-substituted 2-pyrrolidinones: syntheses of streptopyrrolidine and 3-epi-epohelmin A
Source: Royal Society of Chemistry journal article supplement (doi:10.1039/c5qo00250h), 2015-01-01

## Supporting Information

### **Stereoselective Formation of Chiral *trans*-4-Hydroxy-5-Substituted 2-Pyrrolidinones: Syntheses of Streptopyrrolidine and 3-*epi*-Epohelmin A**

Chang-Mei Si,<sup>[a]</sup> Zhuo-Ya Mao,<sup>[a]</sup> Yi-Wen Liu,<sup>[a]</sup> Zhen-Ting Du,<sup>[c]</sup> Bang-Guo Wei\*<sup>[a]</sup> and Guo-Qiang Lin<sup>[b]</sup>

<sup>[a]</sup>*Department of Natural Products Chemistry, School of Pharmacy Fudan University, 826 Zhangheng Road, Shanghai 201203, China*

<sup>[b]</sup>*Shanghai Institute of Organic Chemistry, Chinese Academy of Sciences, 345 Lingling Road, Shanghai 200032, China*

<sup>[c]</sup>*College of Science, Northwest Agriculture and Forestry University, Shaanxi, Yangling, 712100, China*

## Table of Contents

|                                                    |         |
|----------------------------------------------------|---------|
| X-Ray Structures of <i>trans</i> - <b>4a</b> ..... | S3      |
| NMR Spectra of coupled products.....               | S4-S108 |

ORTEP drawing of the X-ray crystallographic structure of *trans*-**4a**

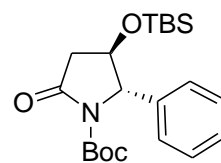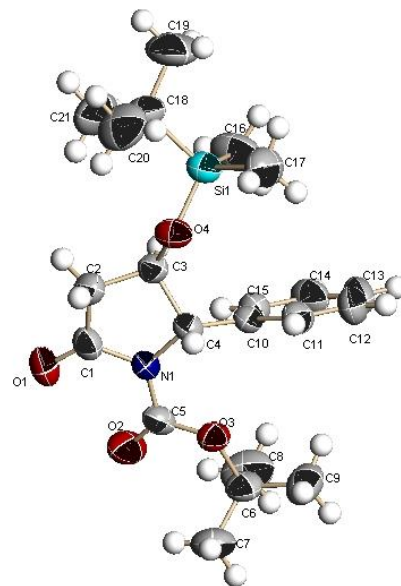

CCDC-1417164. For detailed crystallographic data, please refer to the Cambridge Crystallographic Data Centre at:

[http://www.ccdc.cam.ac.uk/data\\_request/cif](http://www.ccdc.cam.ac.uk/data_request/cif).

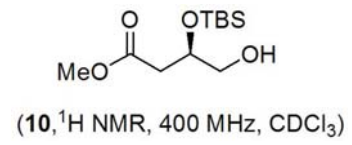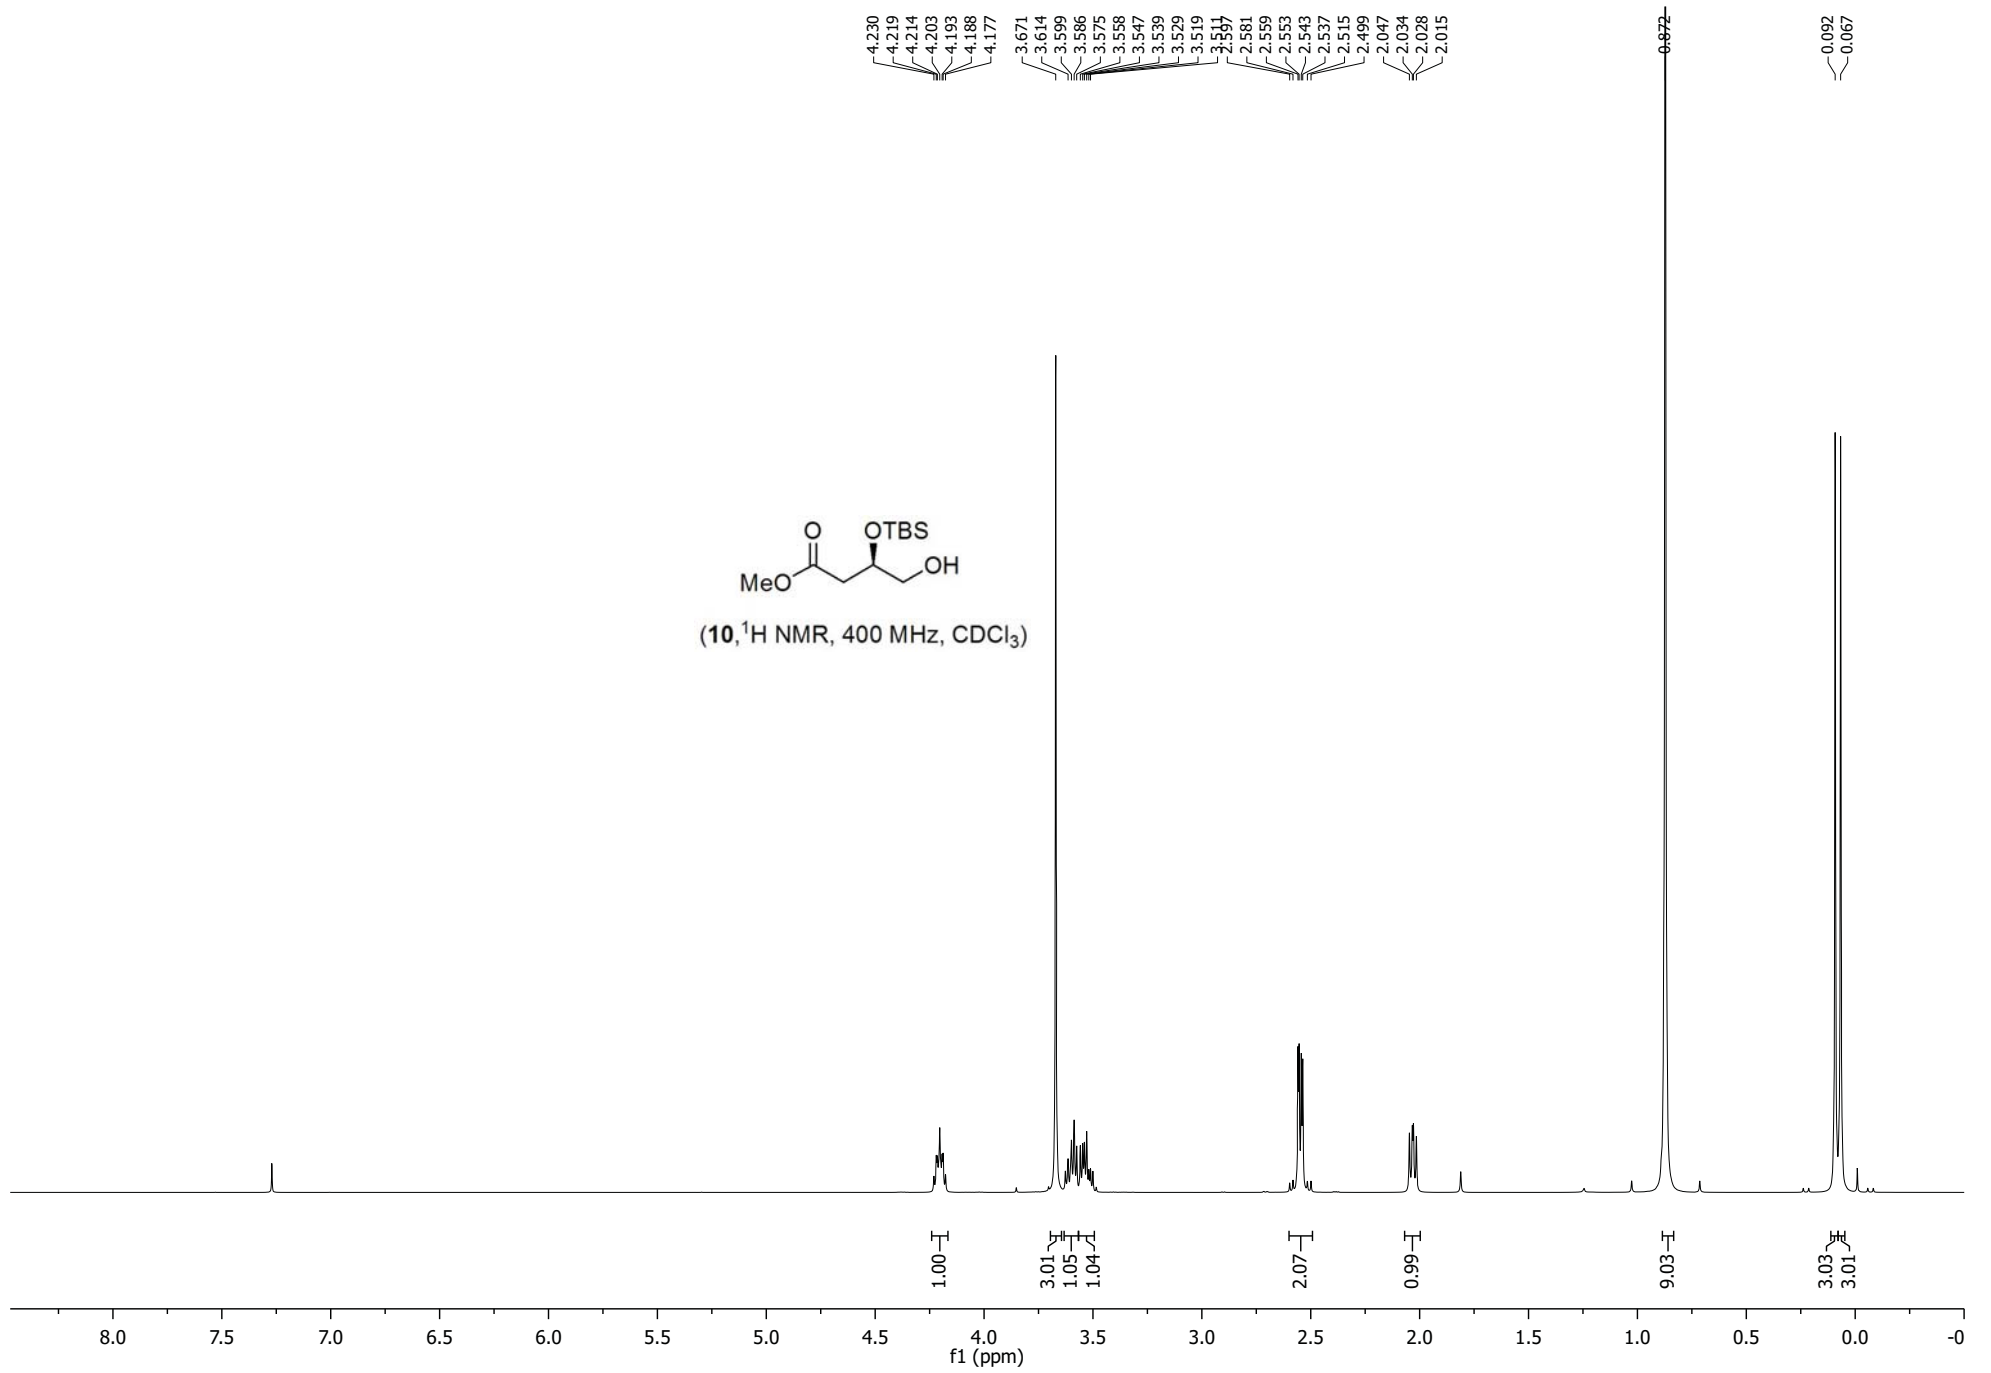

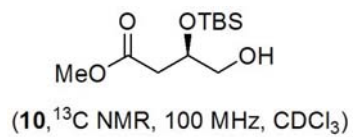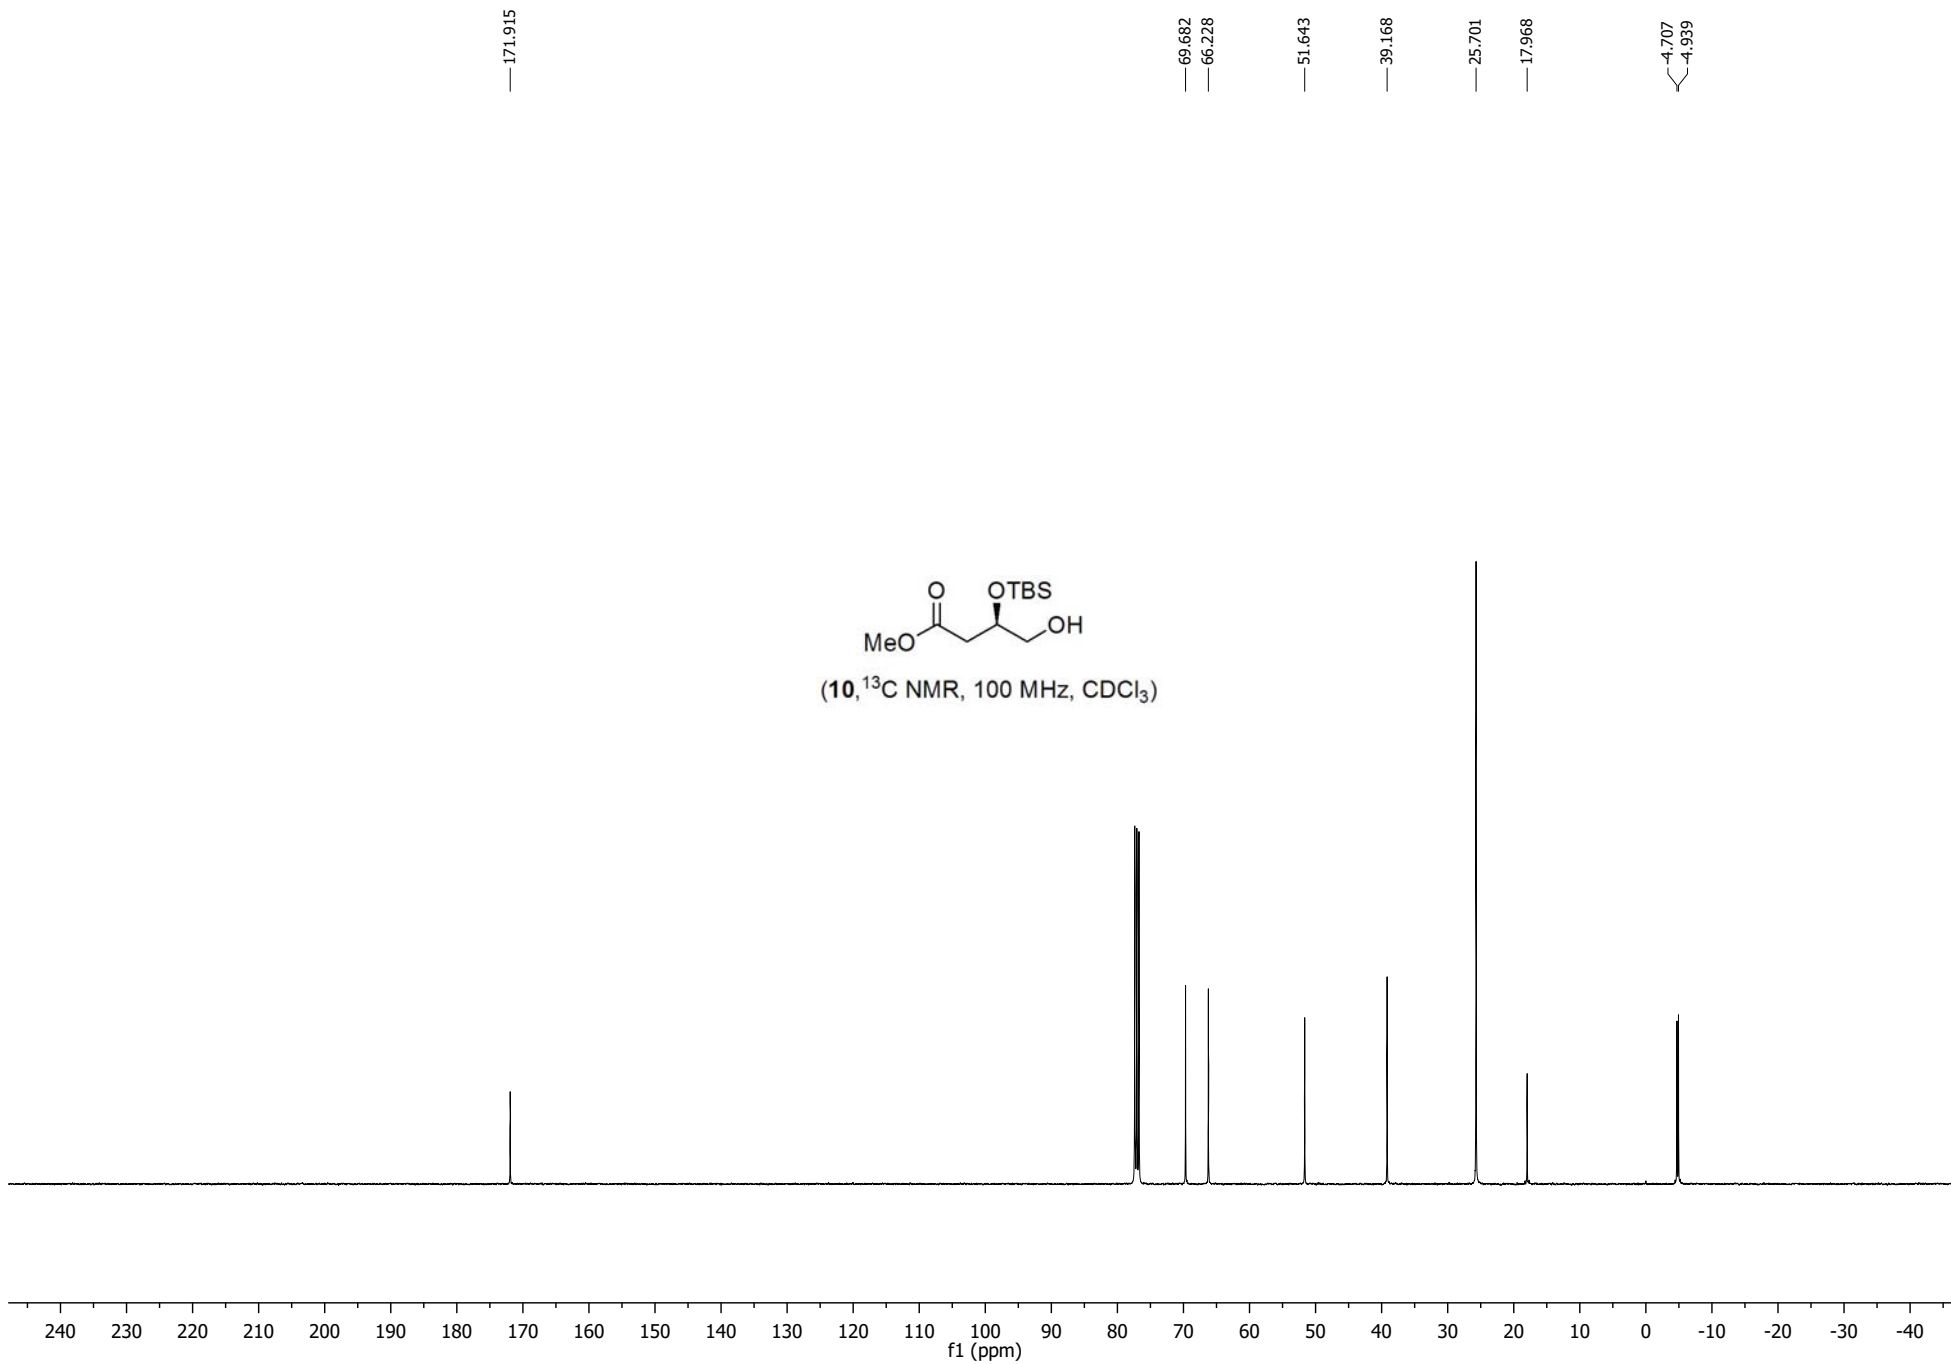

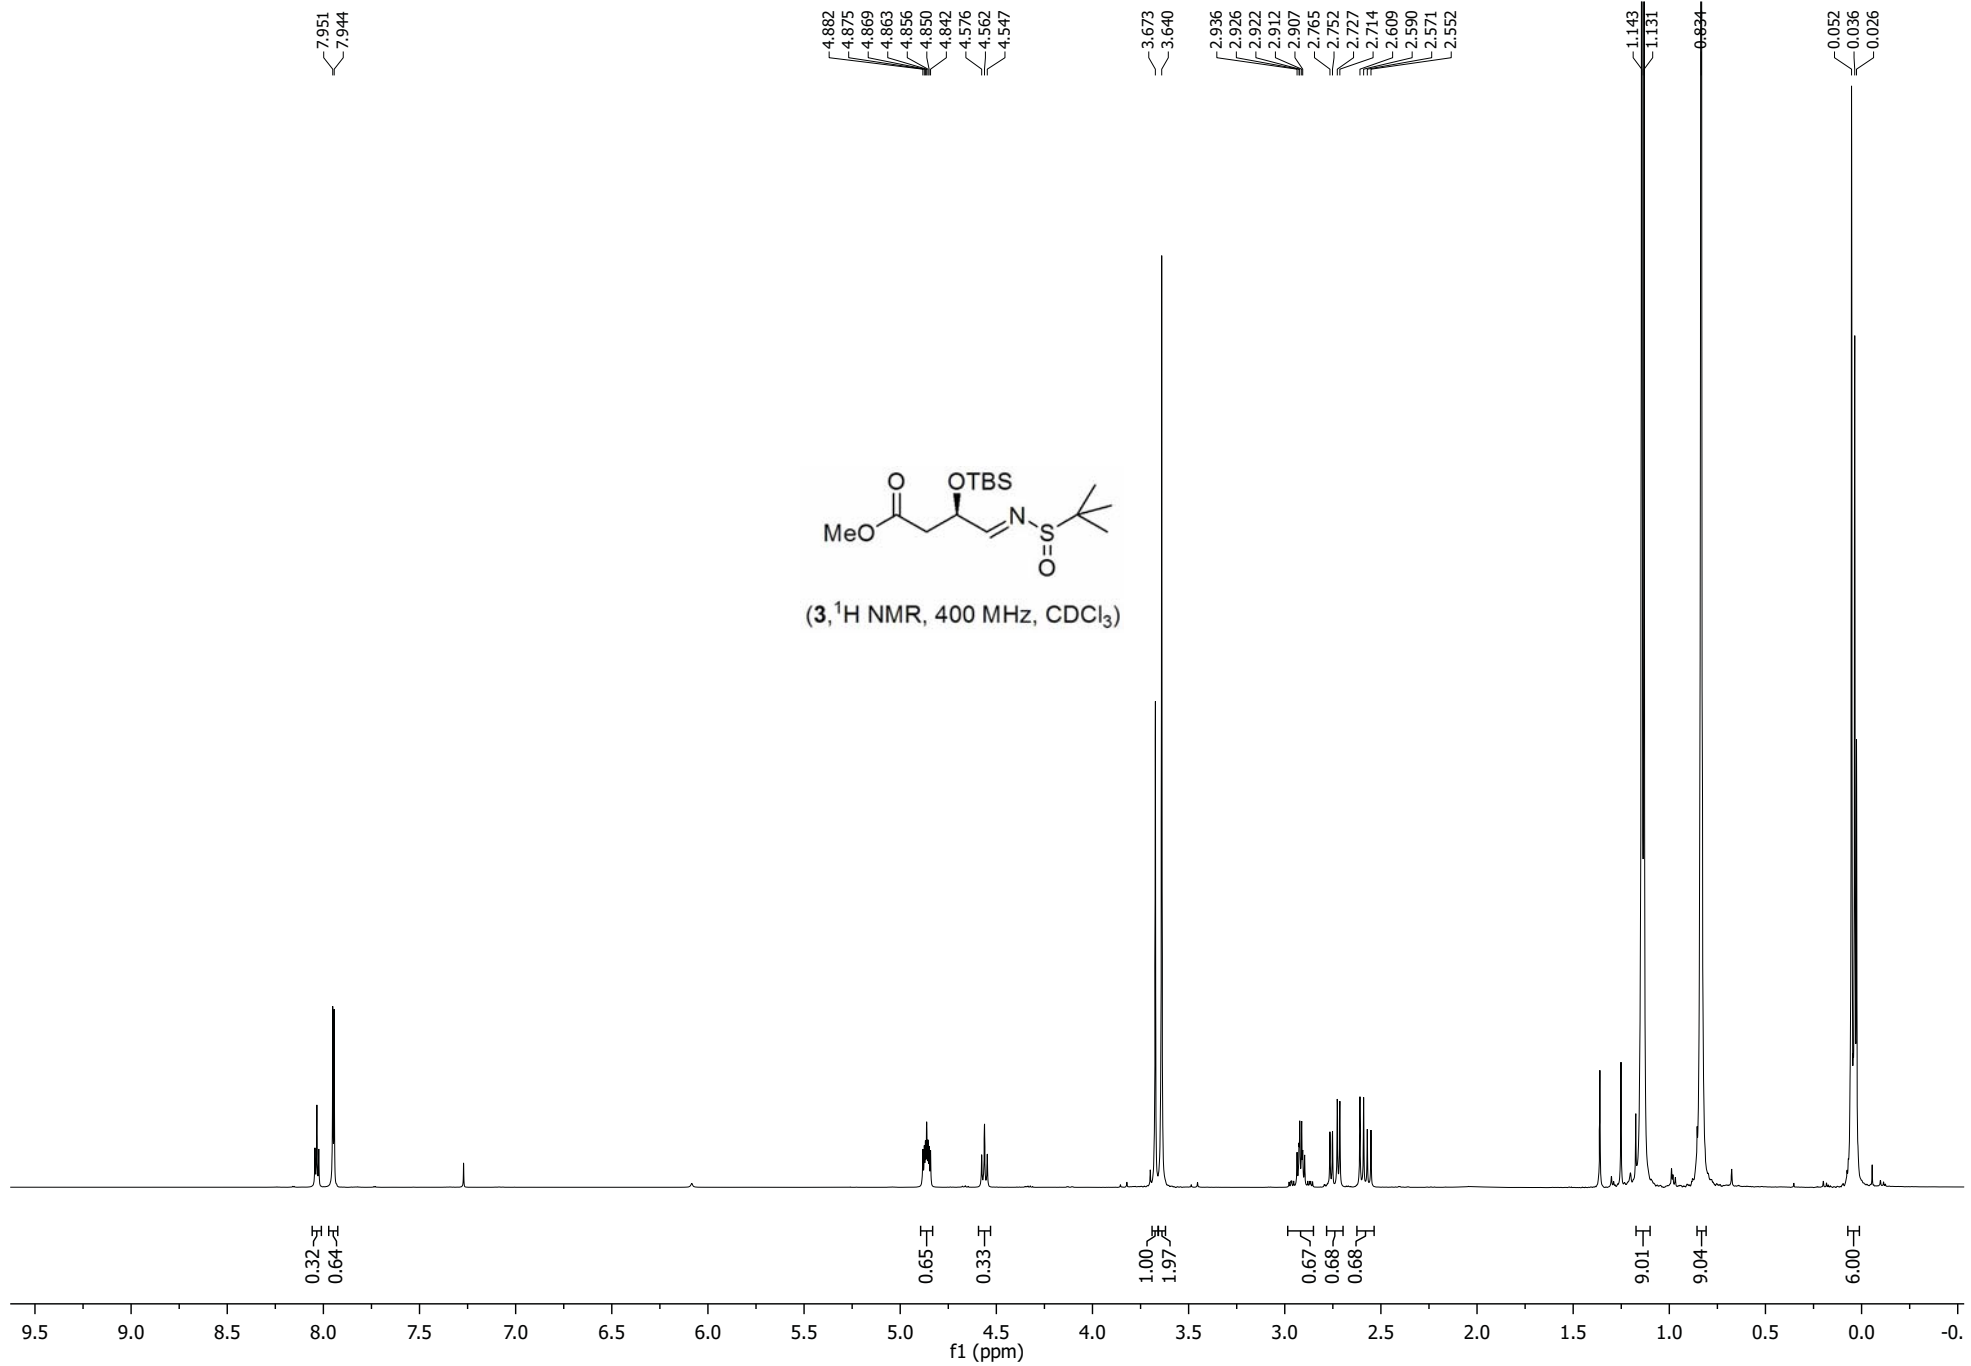

172.603  
170.732  
169.369  
165.658

71.153  
69.340

57.045  
56.781  
52.025  
51.761

40.921  
40.272

25.623  
25.598  
22.343  
22.248  
18.170  
18.002

-4.533  
-4.949  
-5.146  
-5.386

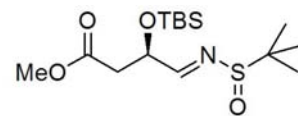

(3,  $^{13}\text{C}$  NMR, 100 MHz,  $\text{CDCl}_3$ )

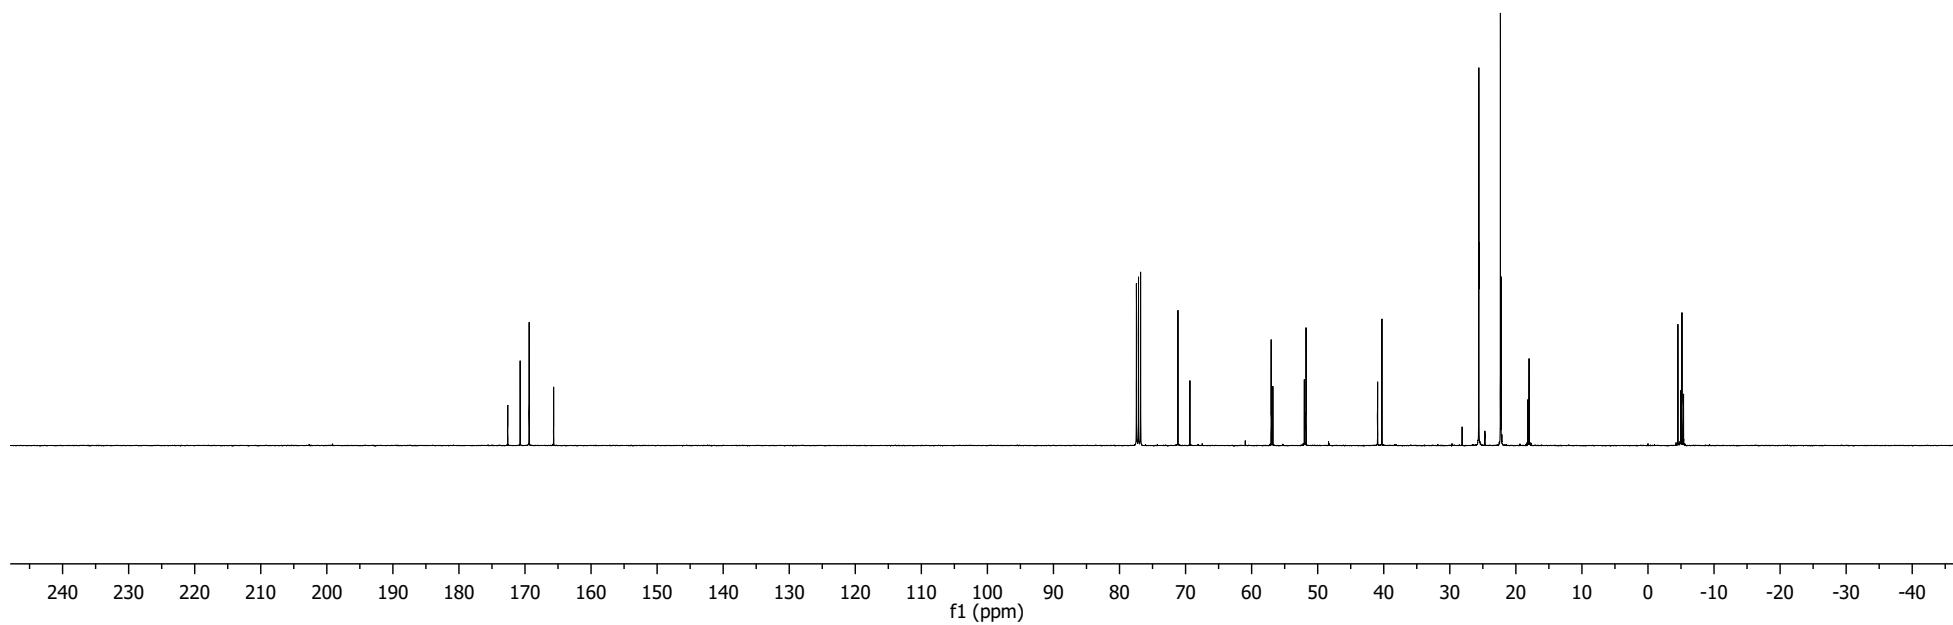

7.409  
7.406  
7.402  
7.389  
7.385  
7.370  
7.340  
7.337  
7.328  
7.322  
7.316  
7.304  
7.285  
7.209  
7.206  
7.188

4.970

4.132  
4.127  
4.122  
4.118  
4.113  
4.108

2.901  
2.887  
2.858  
2.844  
2.453  
2.449  
2.410  
2.405

1.345

0.966

0.083  
0.059

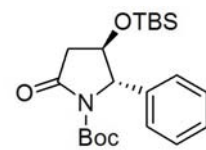

(4a,  $^1\text{H}$  NMR, 400 MHz,  $\text{CDCl}_3$ )

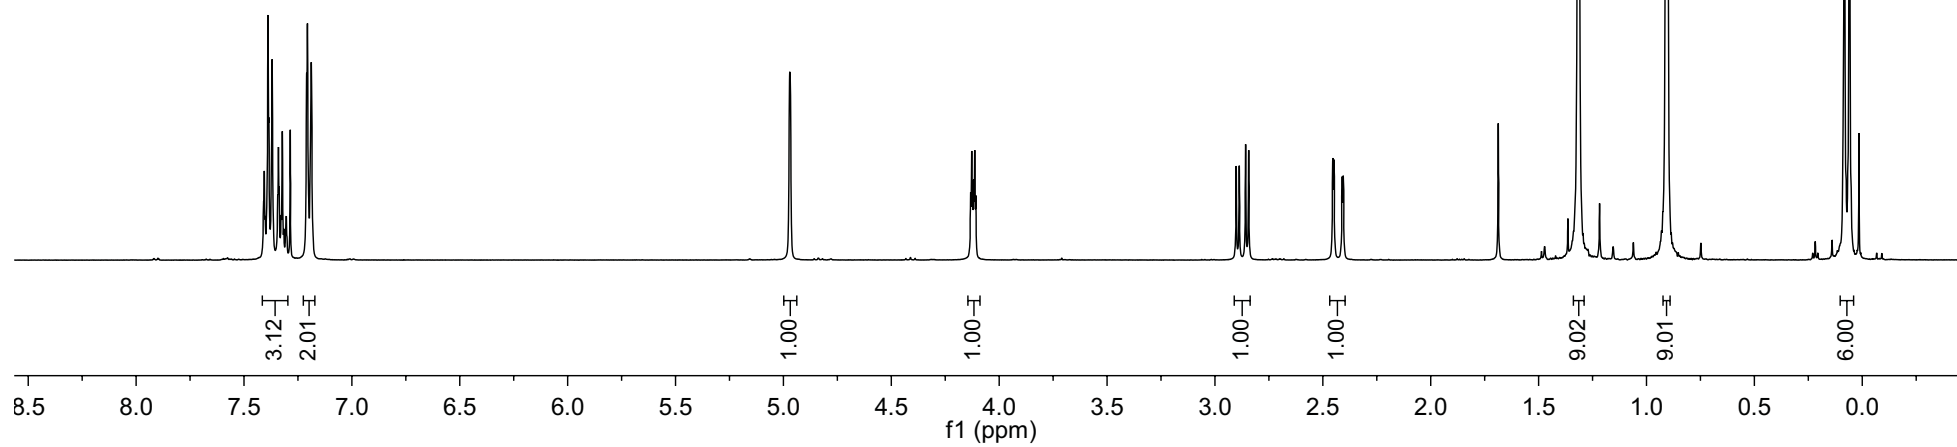



— 172.880  
— 149.552  
— 139.064  
{ 128.982  
{ 127.958  
{ 125.173  
— 82.962  
{ 72.001  
{ 71.442  
— 41.027  
{ 27.702  
{ 25.677  
— 17.990  
{ -4.761  
{ -4.800

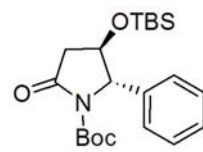

(4a, <sup>13</sup>C NMR, 100 MHz, CDCl<sub>3</sub>)

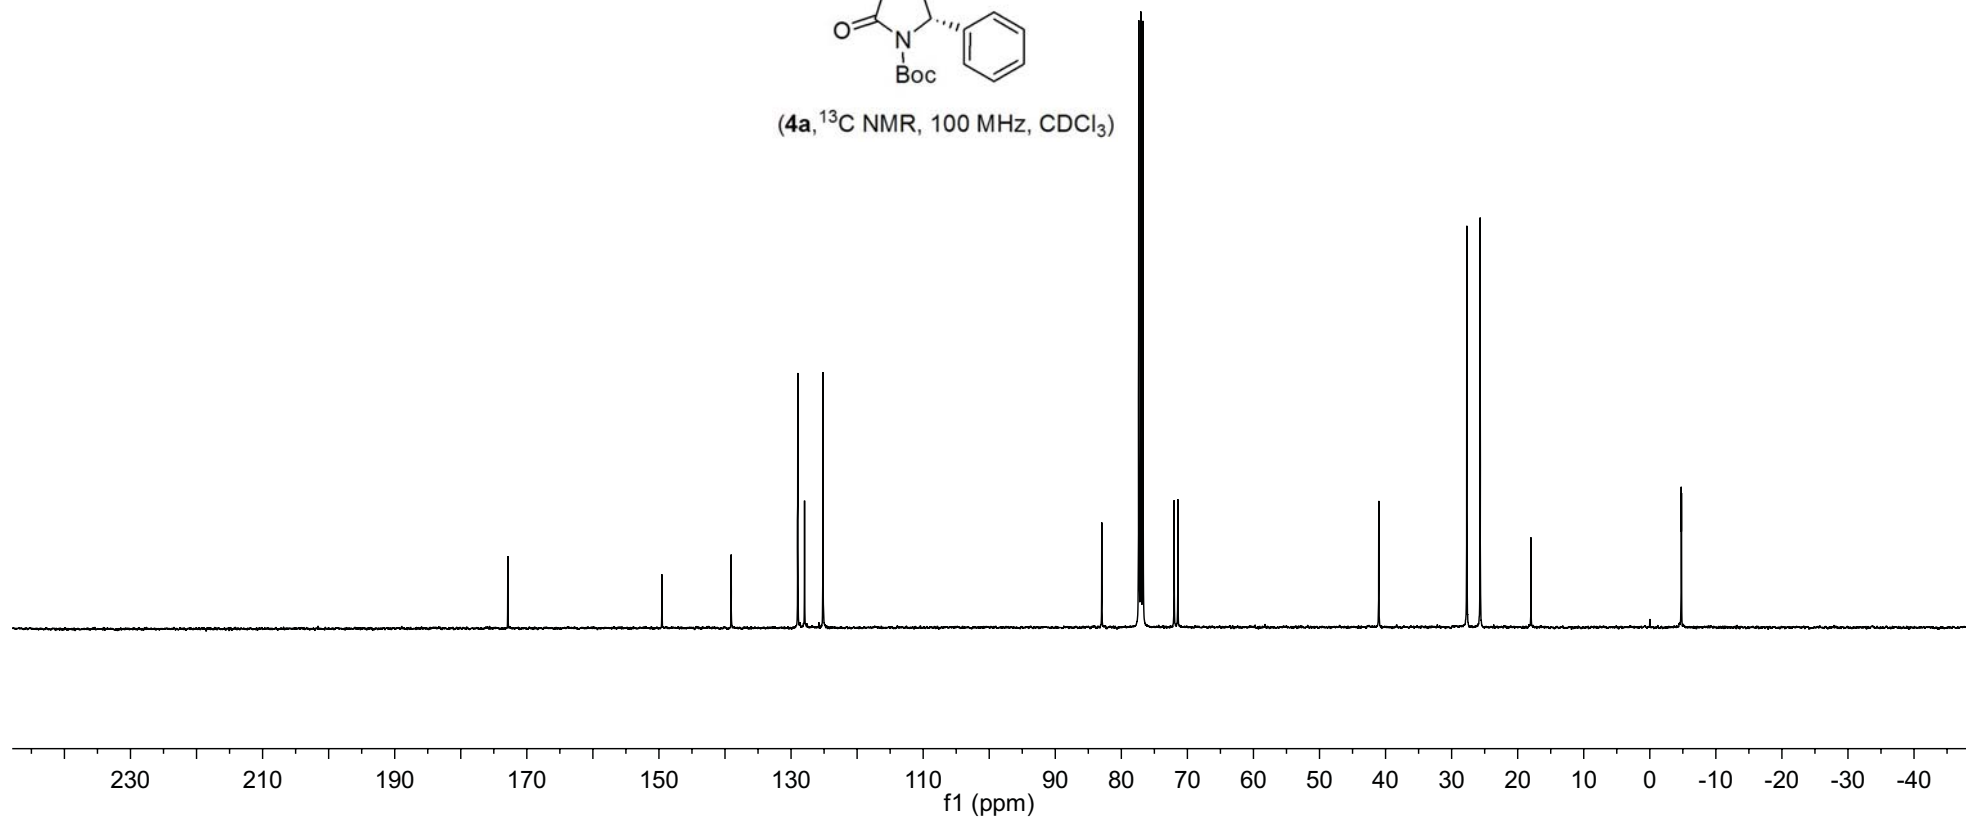

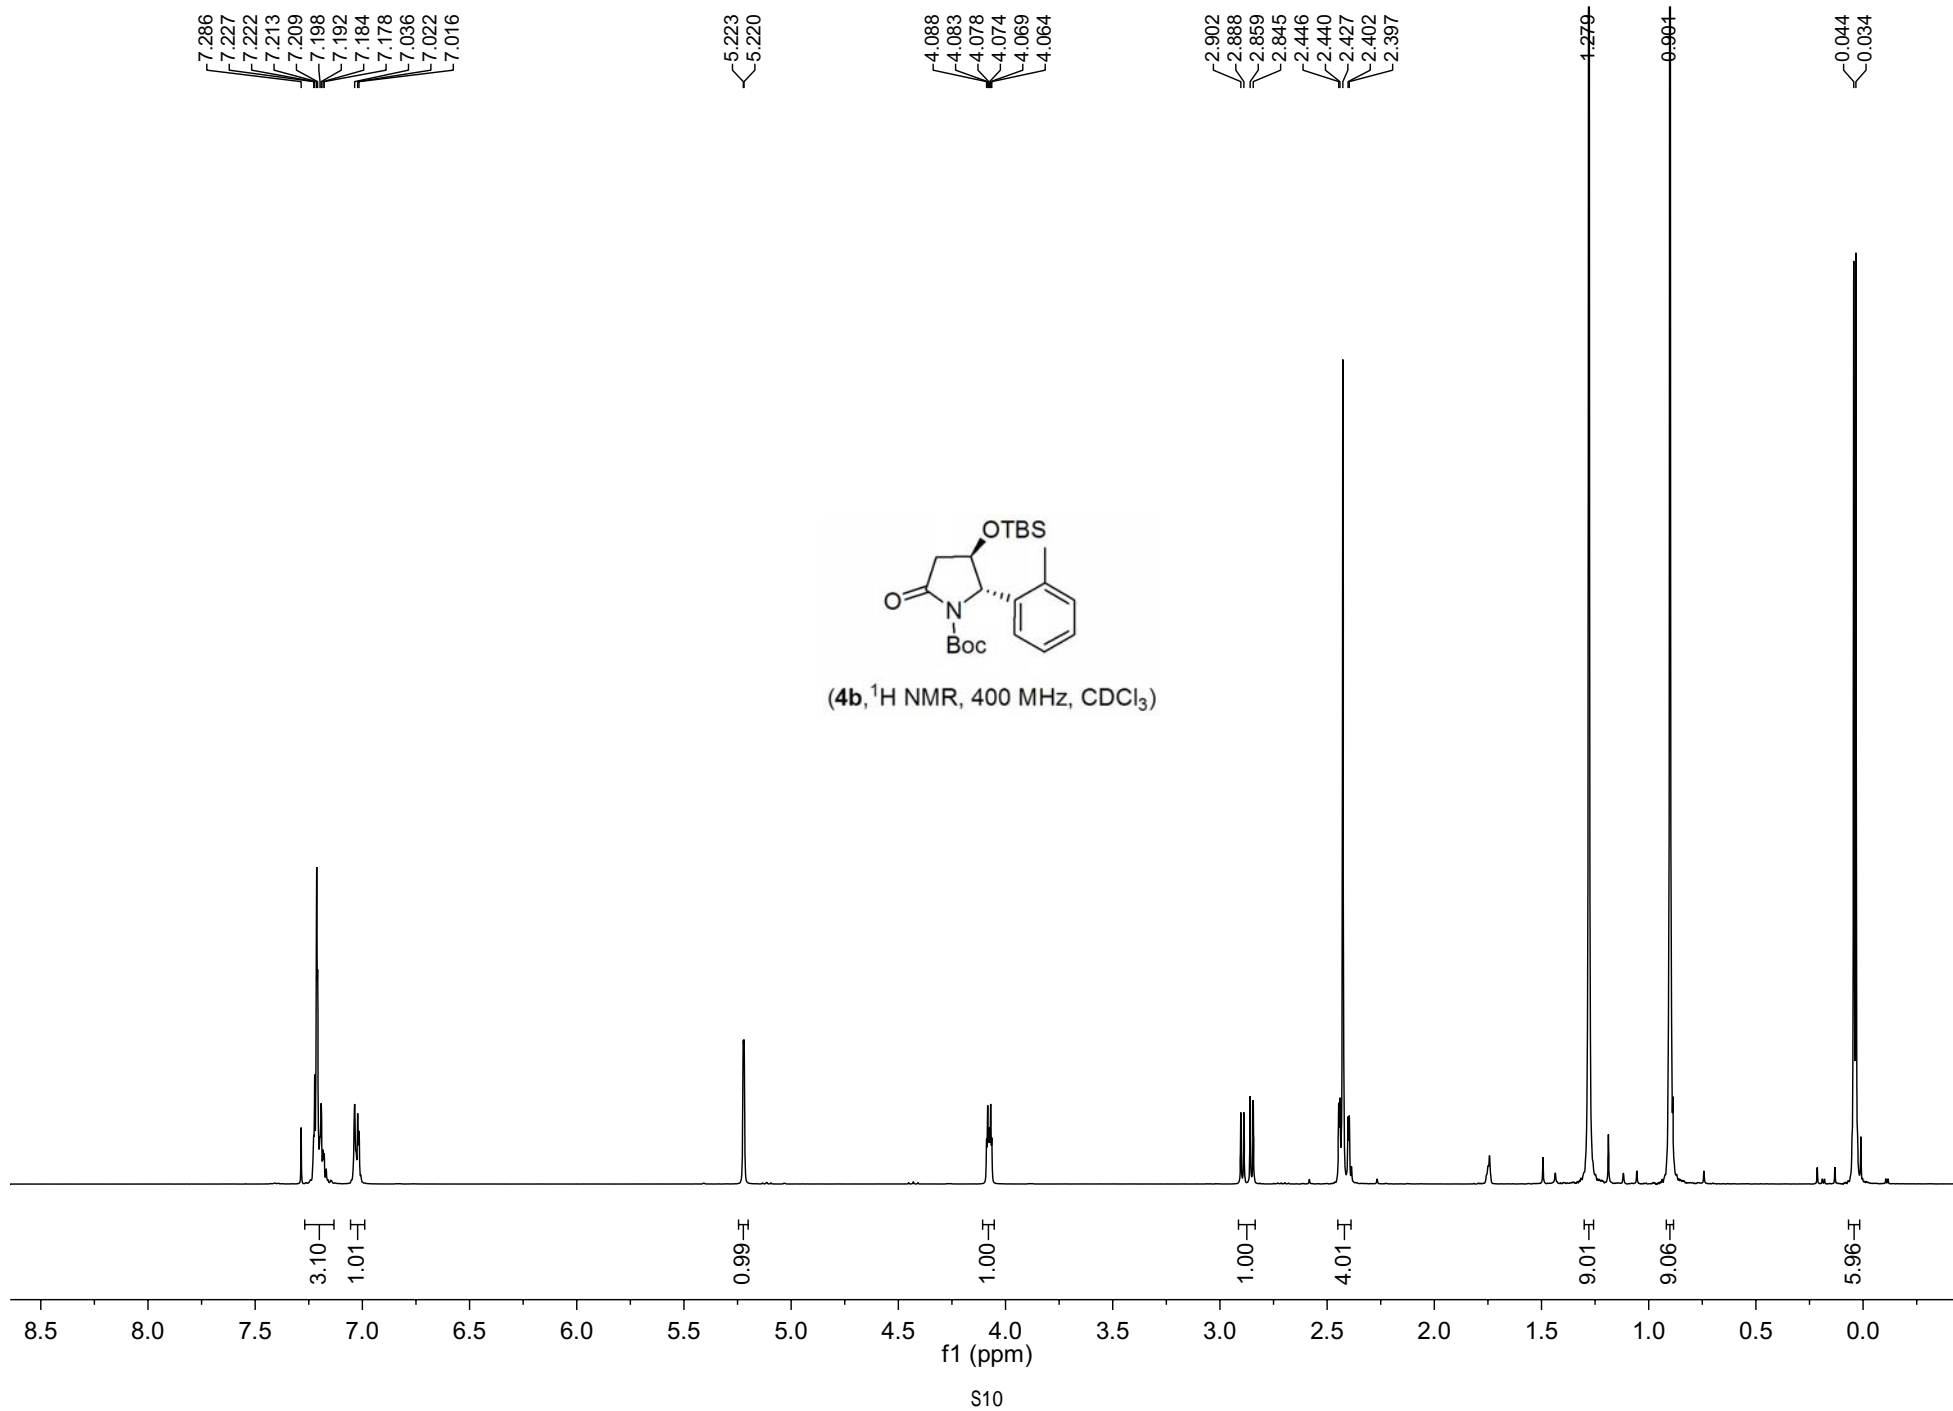

—172.999  
—149.427  
137.135  
134.893  
130.836  
127.698  
126.555  
123.213  
  
—82.848  
—71.089  
—67.866  
  
—41.149  
—27.632  
—25.617  
—19.308  
—17.829  
  
—4.572  
—4.900

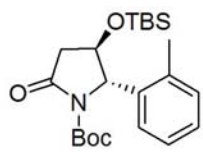

(4b, <sup>13</sup>C NMR, 100 MHz, CDCl<sub>3</sub>)

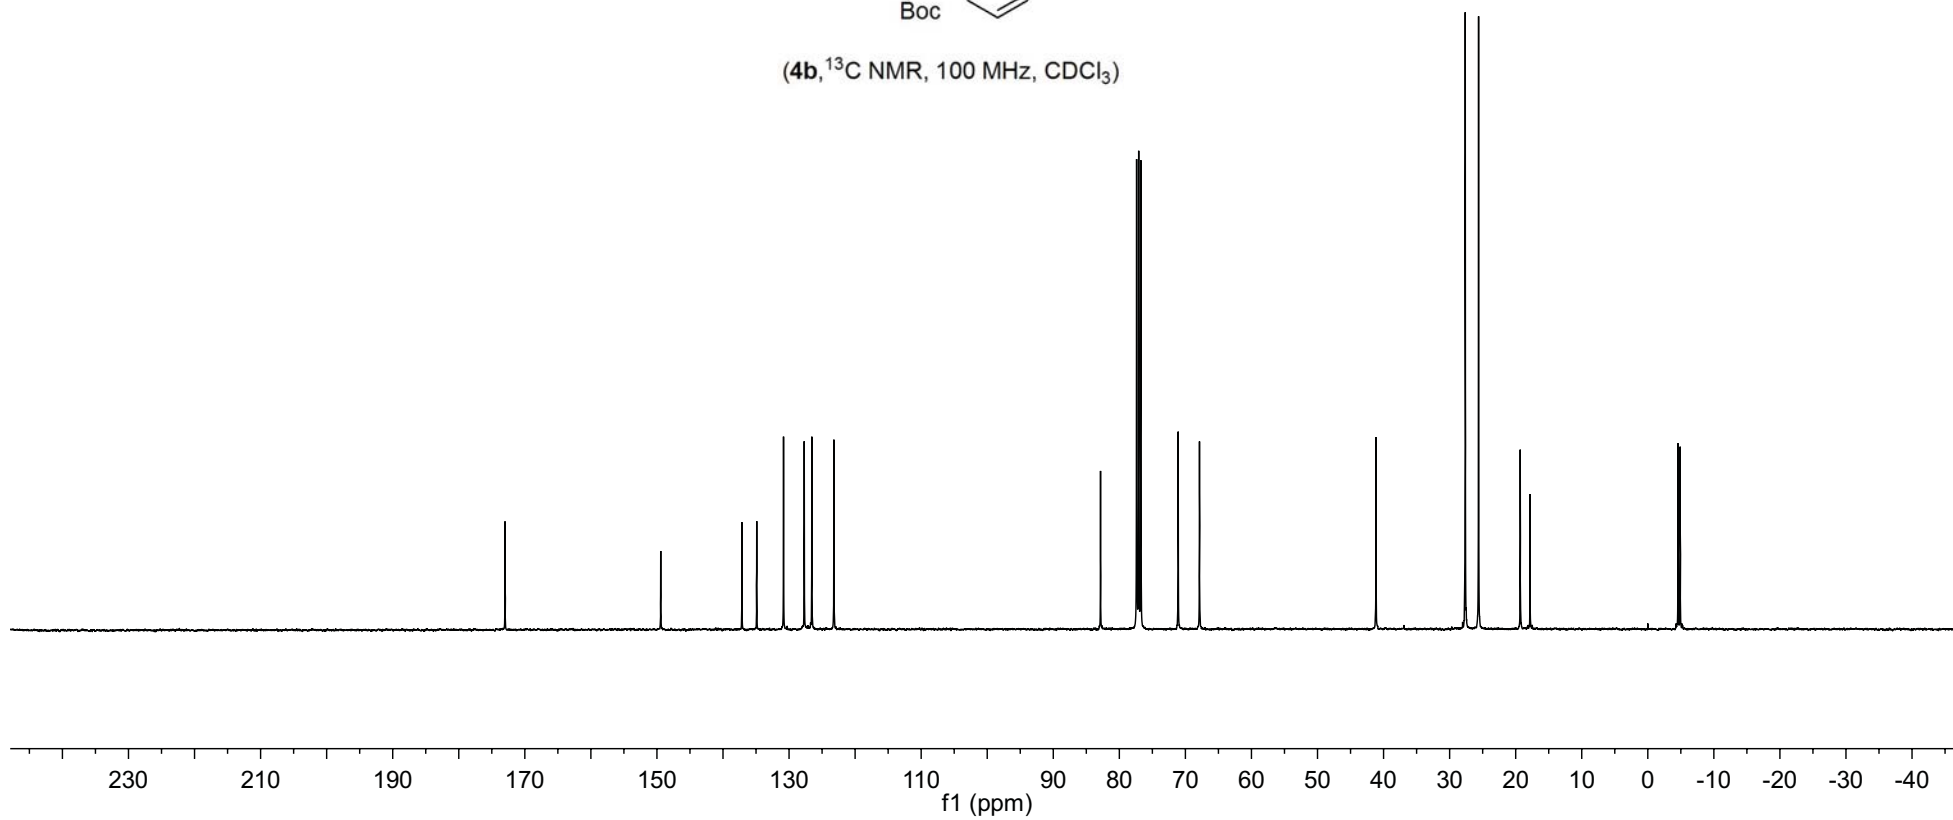

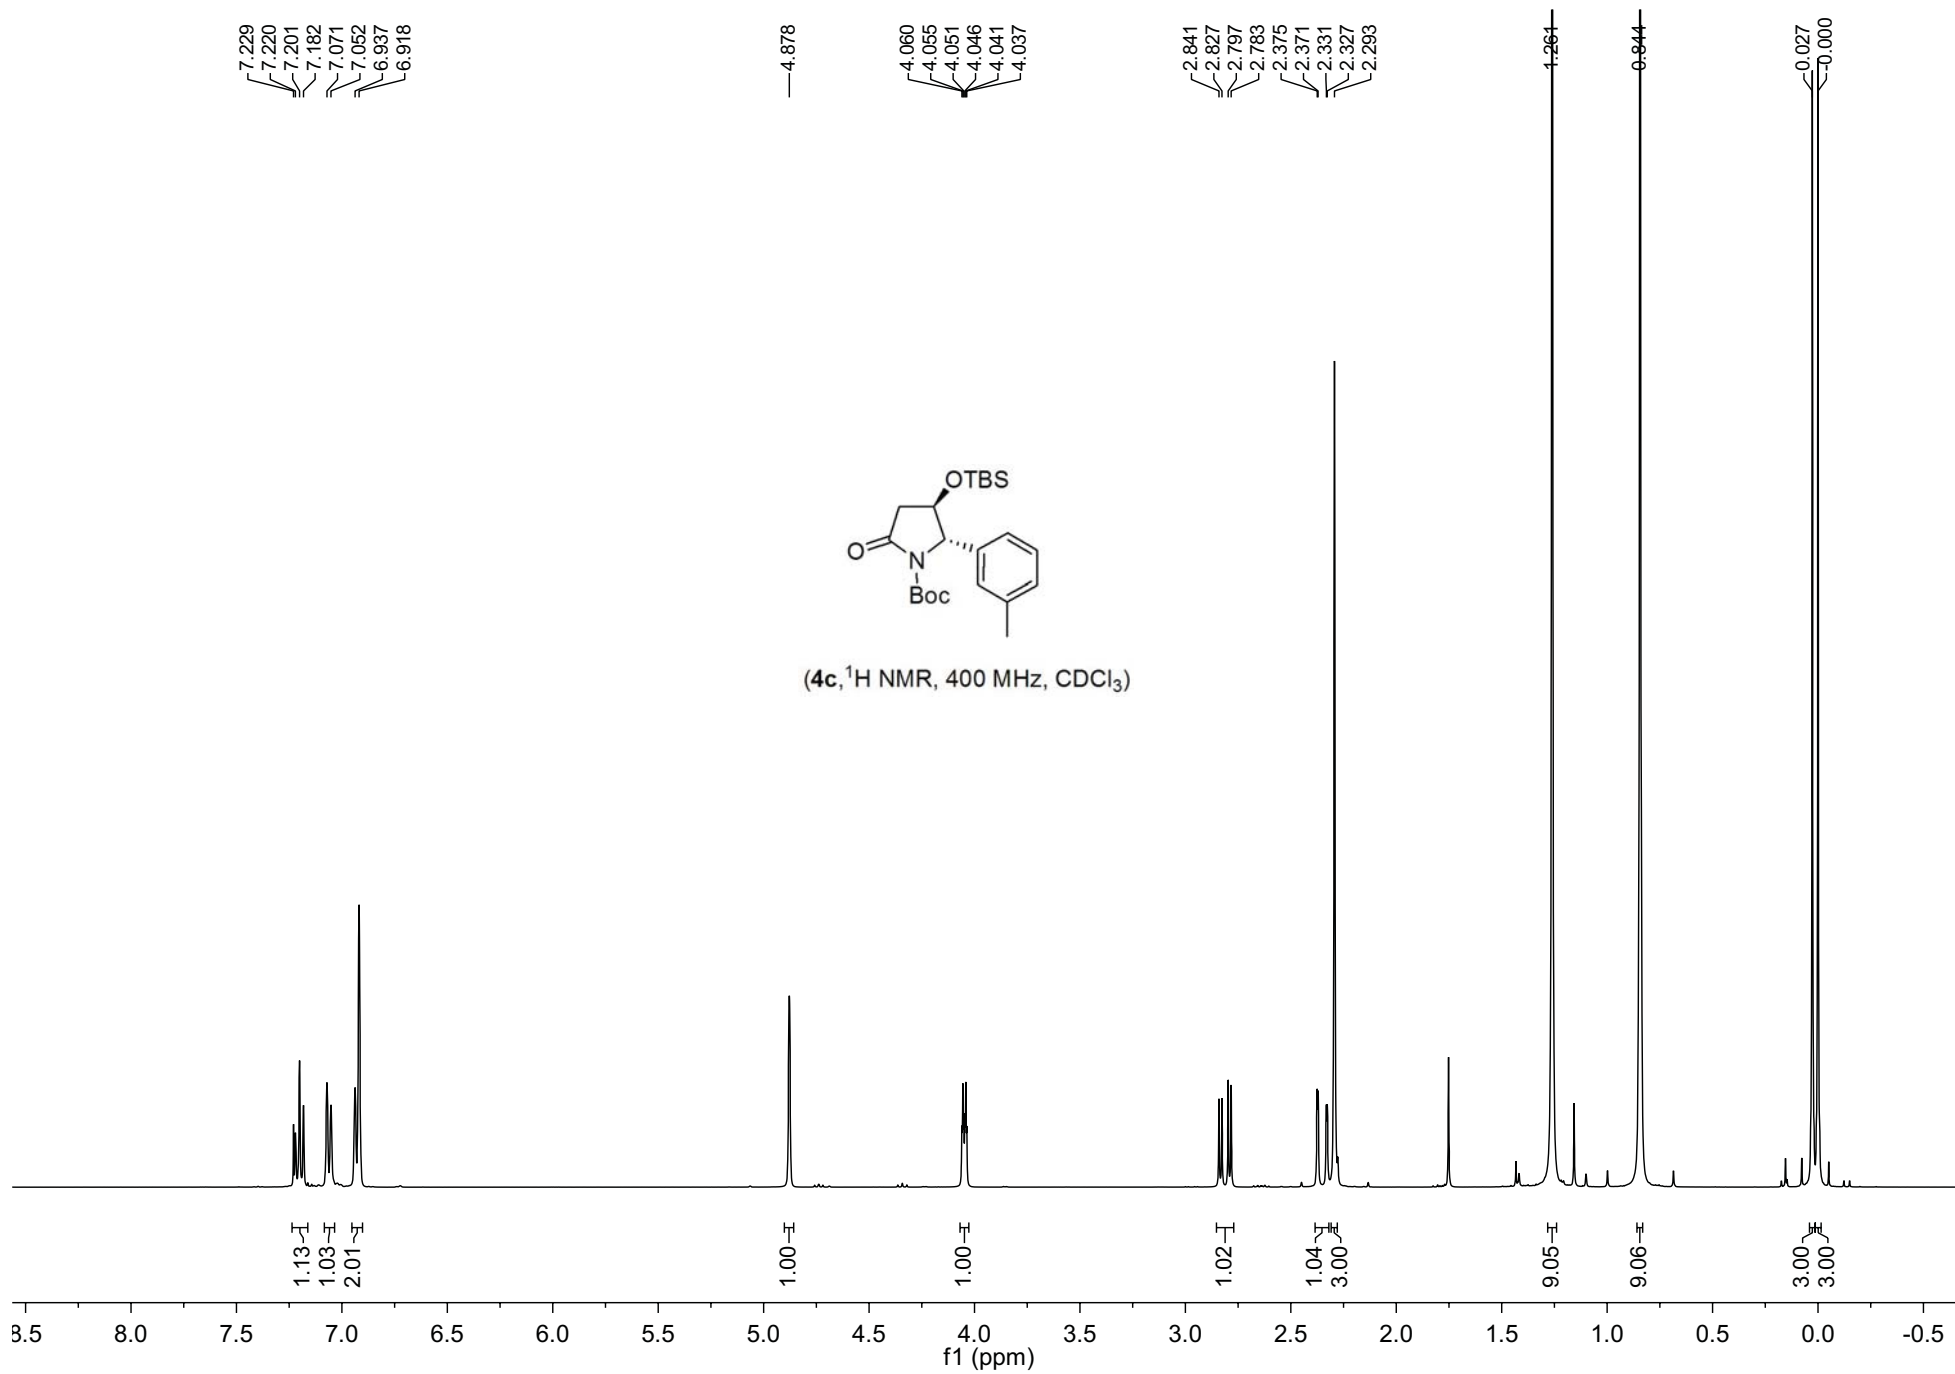

—173.001  
—149.626  
138.947  
138.707  
128.869  
128.657  
125.649  
122.324  
—82.906  
71.973  
71.429  
—41.069  
27.702  
25.672  
21.438  
17.983  
—4.740  
—4.790

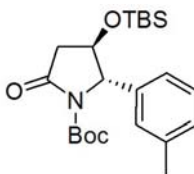

(**4c**,  $^{13}\text{C}$  NMR, 100 MHz,  $\text{CDCl}_3$ )

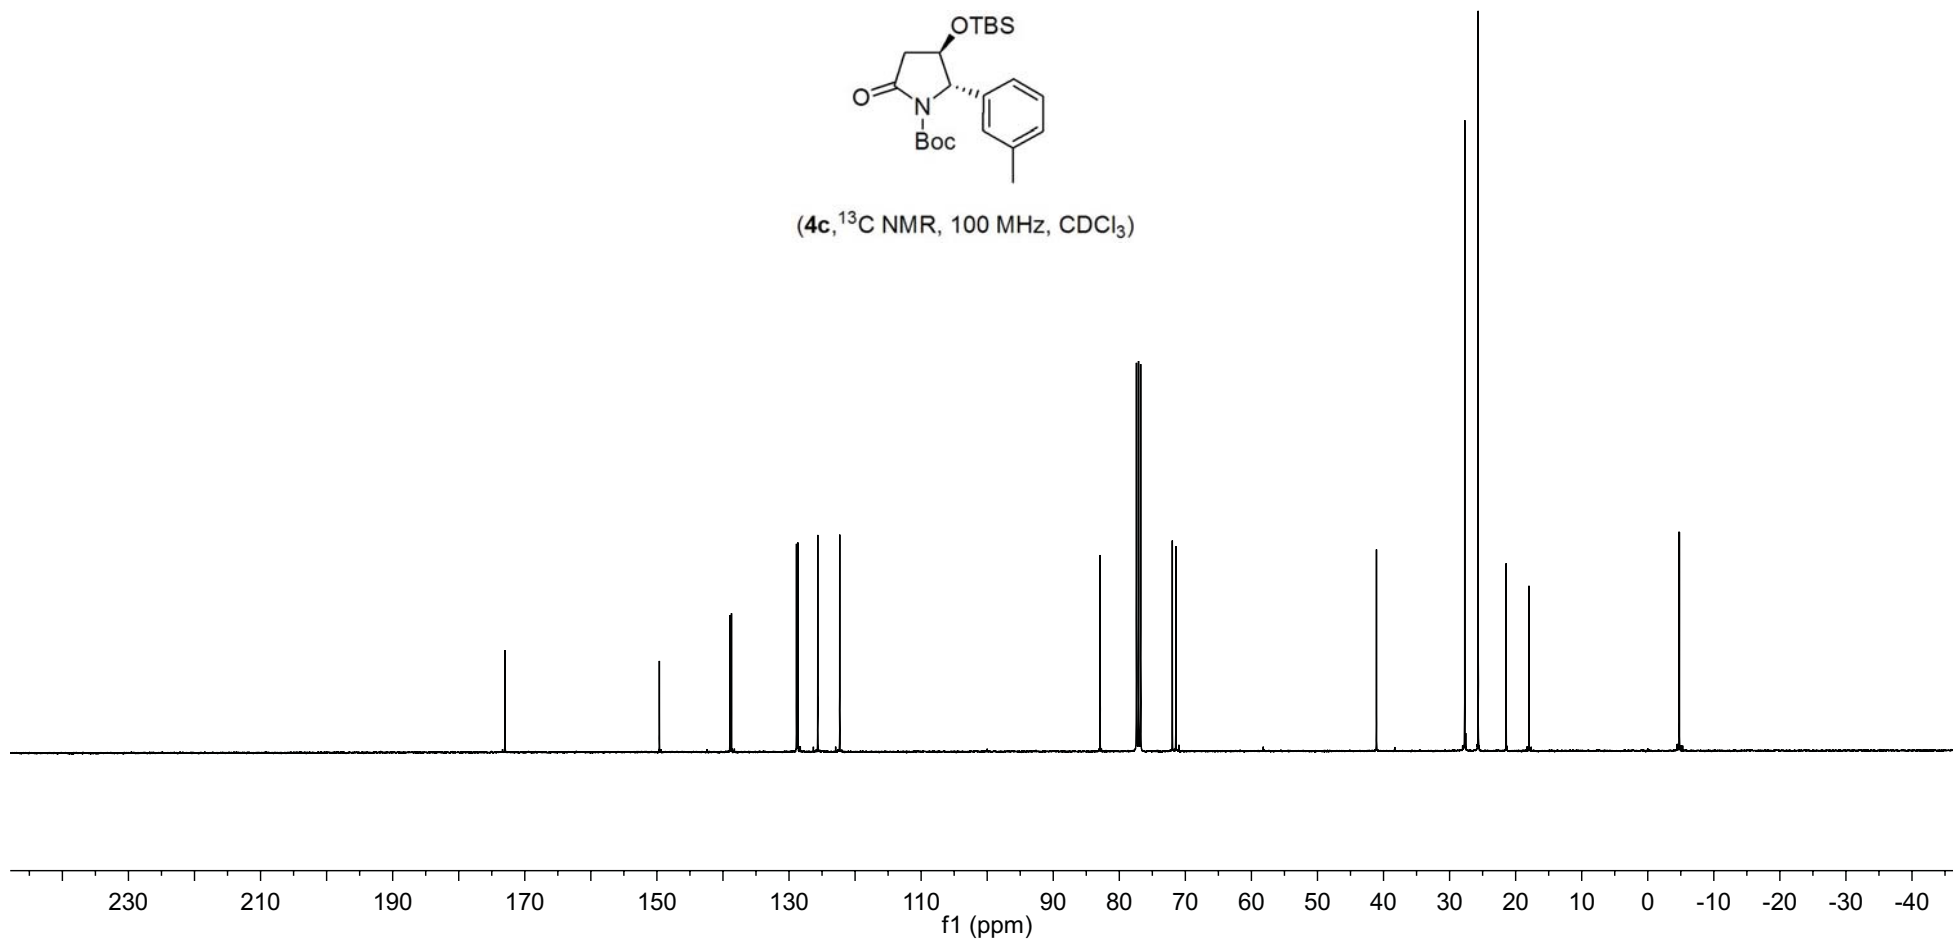

7.280  
7.191  
7.171  
7.081  
7.060

4.949

4.098  
4.094  
4.090  
4.084  
4.080  
4.076

2.887  
2.873  
2.843  
2.829  
2.421  
2.419  
2.416  
2.415  
2.377  
2.376  
2.373  
2.371  
2.358

1.332

0.992

0.089  
0.059

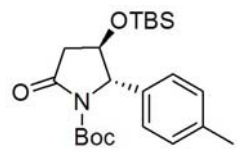

(4d, <sup>1</sup>H NMR, 400 MHz, CDCl<sub>3</sub>)

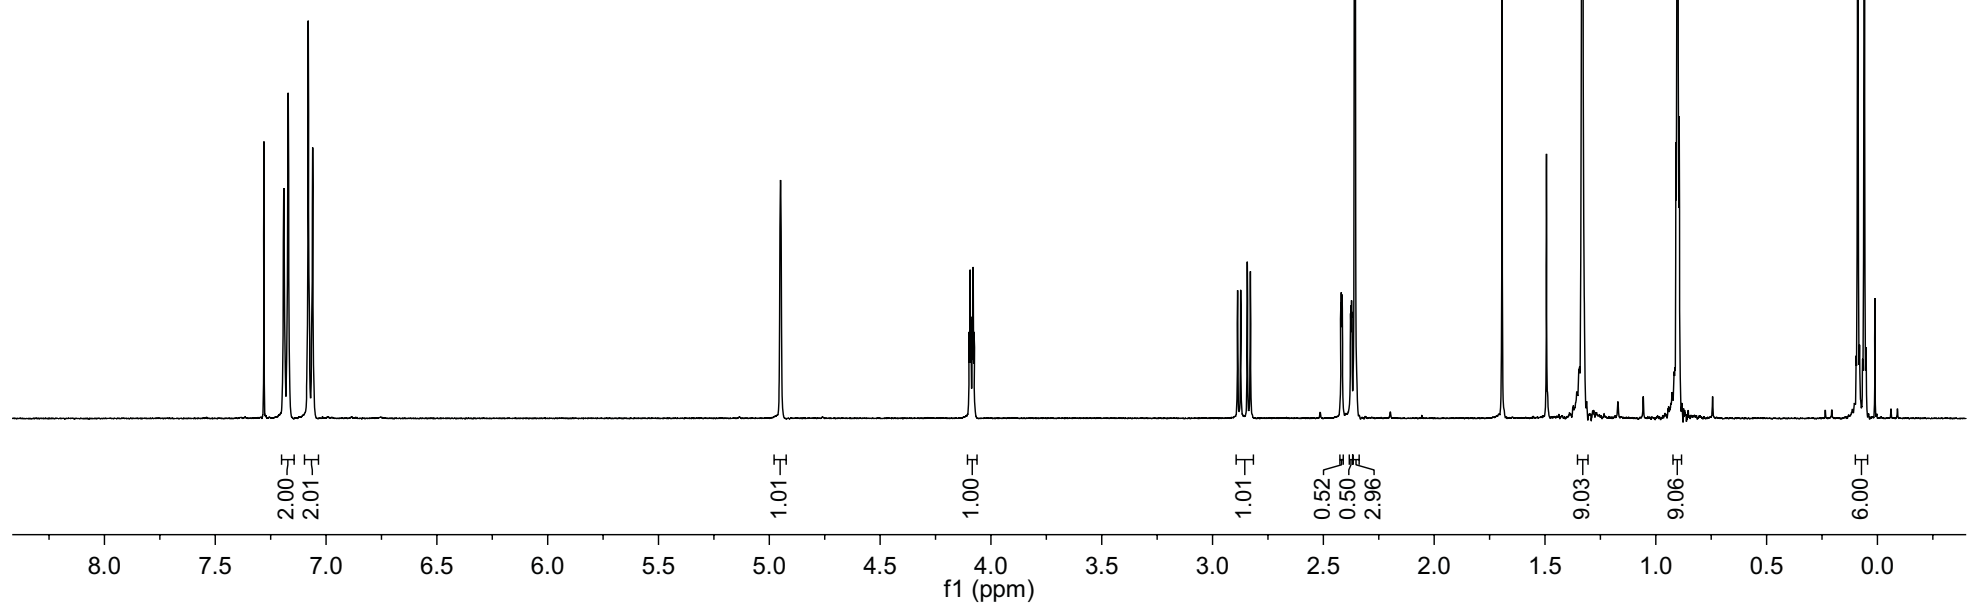

—172.981  
—149.668  
—137.678  
—135.957  
—129.624  
—125.051  
—82.887  
—72.055  
—71.288  
—41.019  
—27.747  
—25.688  
—21.071  
—17.999  
—4.724  
—4.790

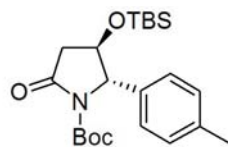

(4d,  $^{13}\text{C}$  NMR, 100 MHz,  $\text{CDCl}_3$ )

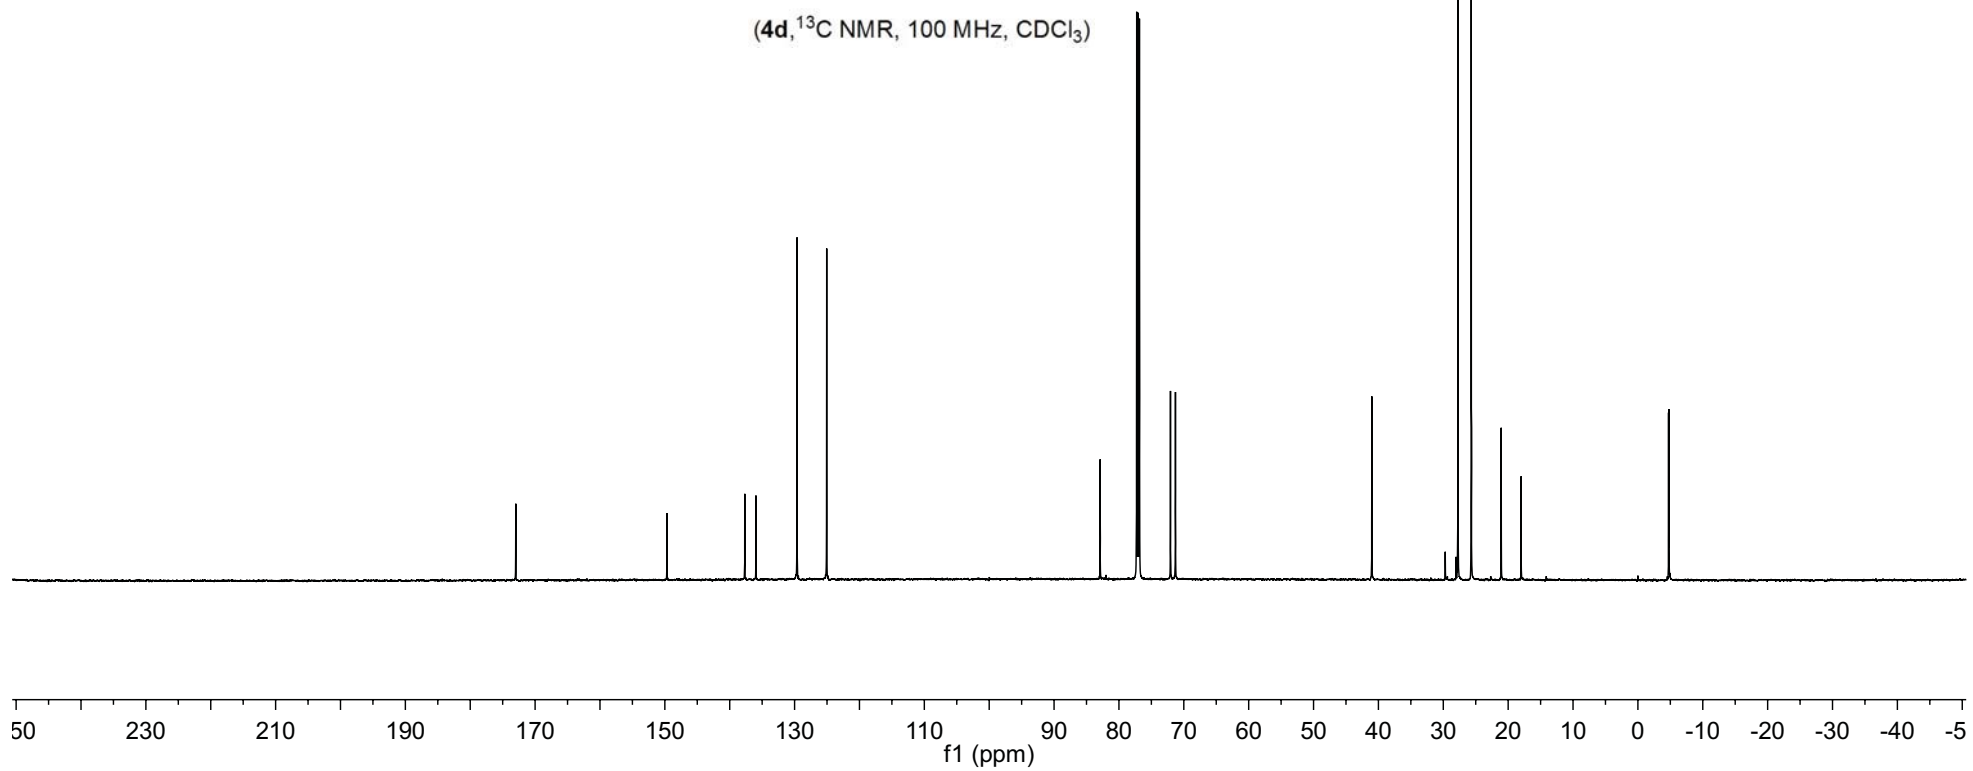

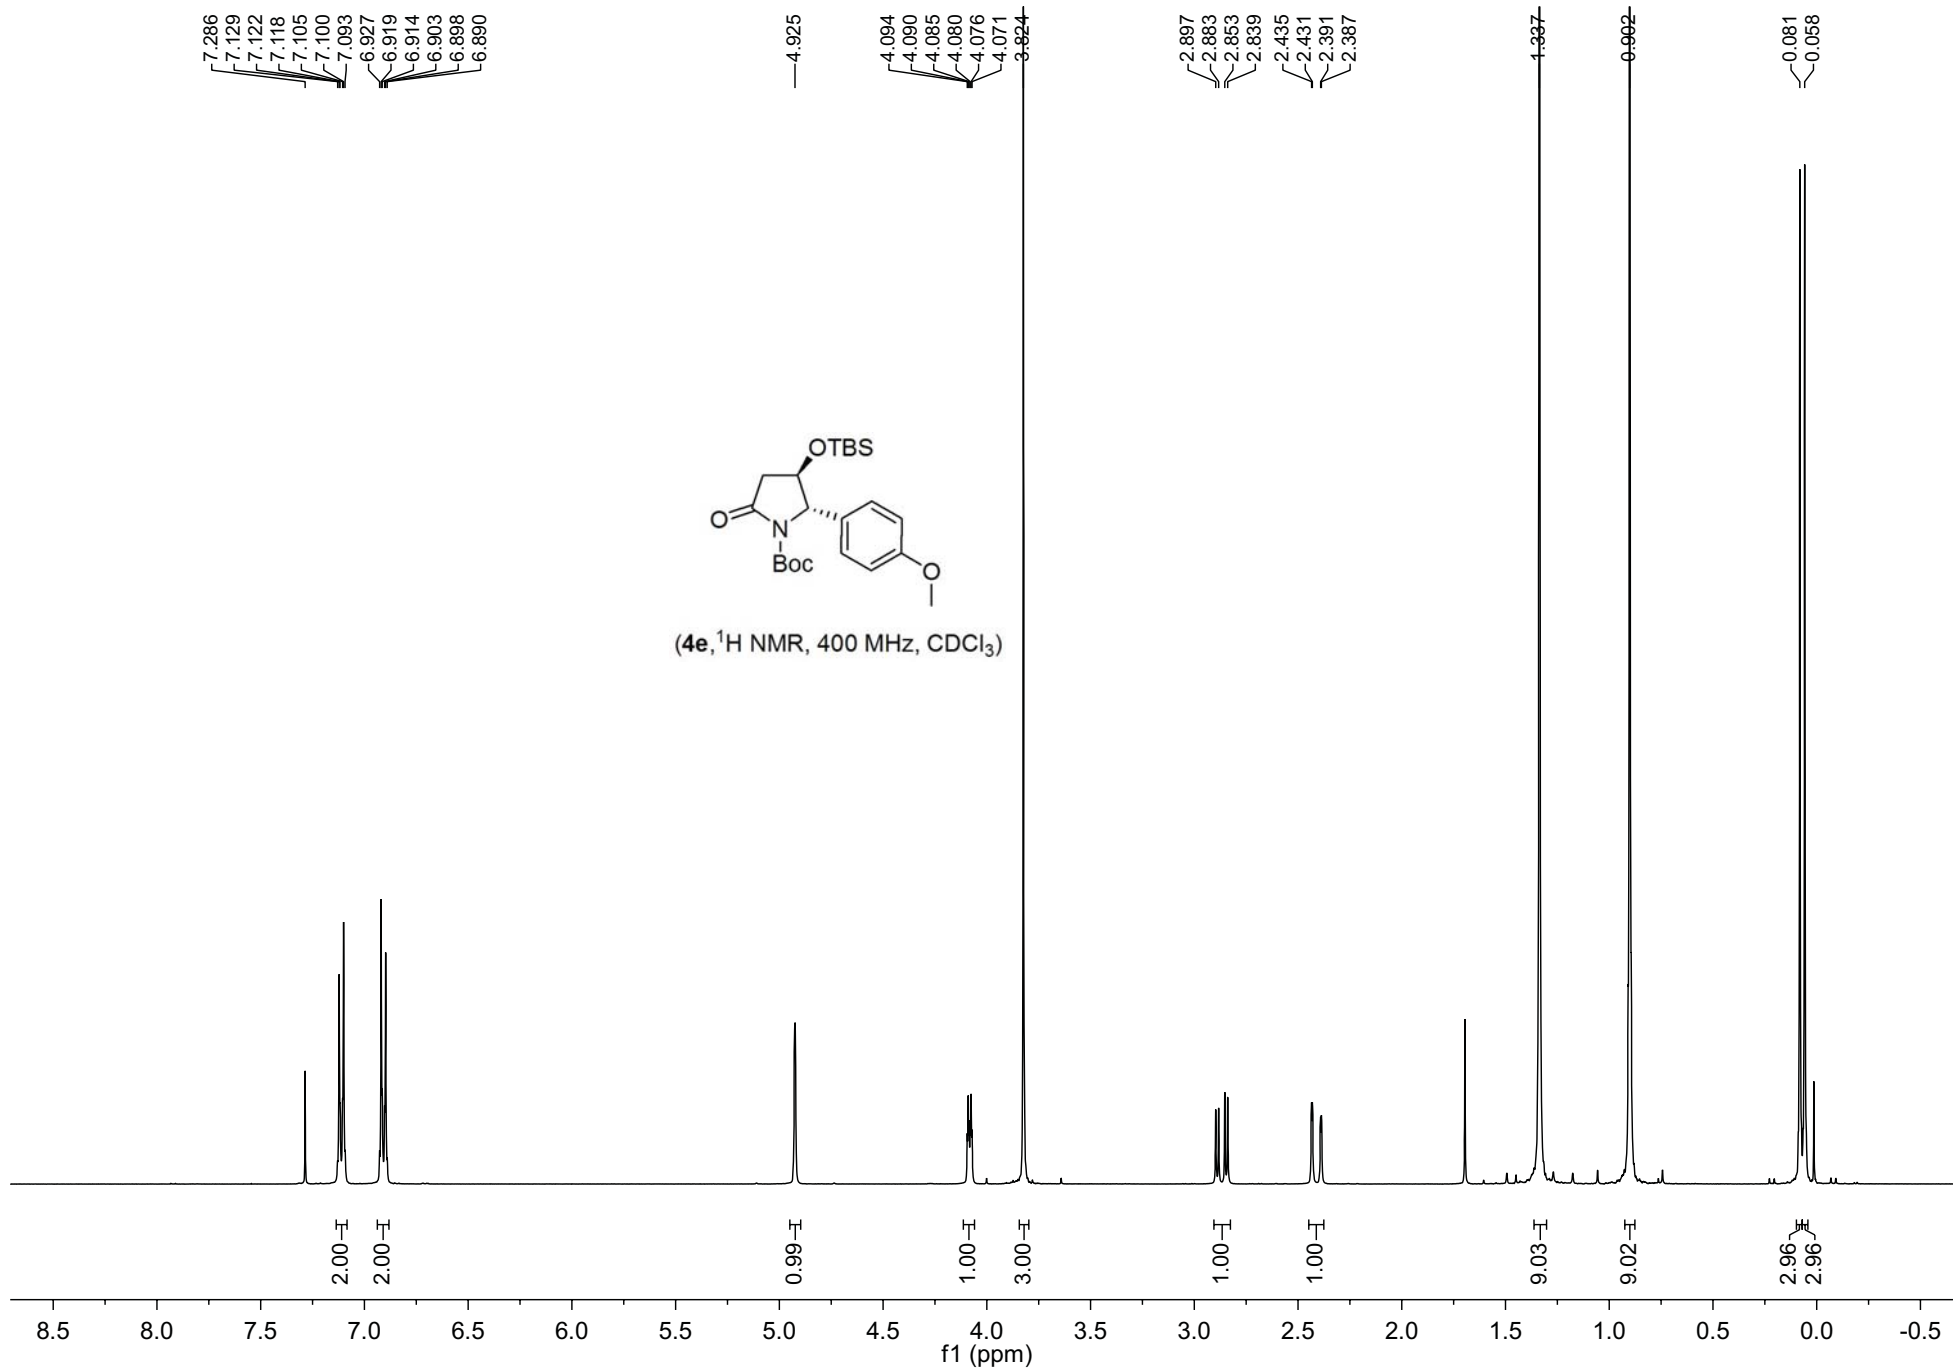



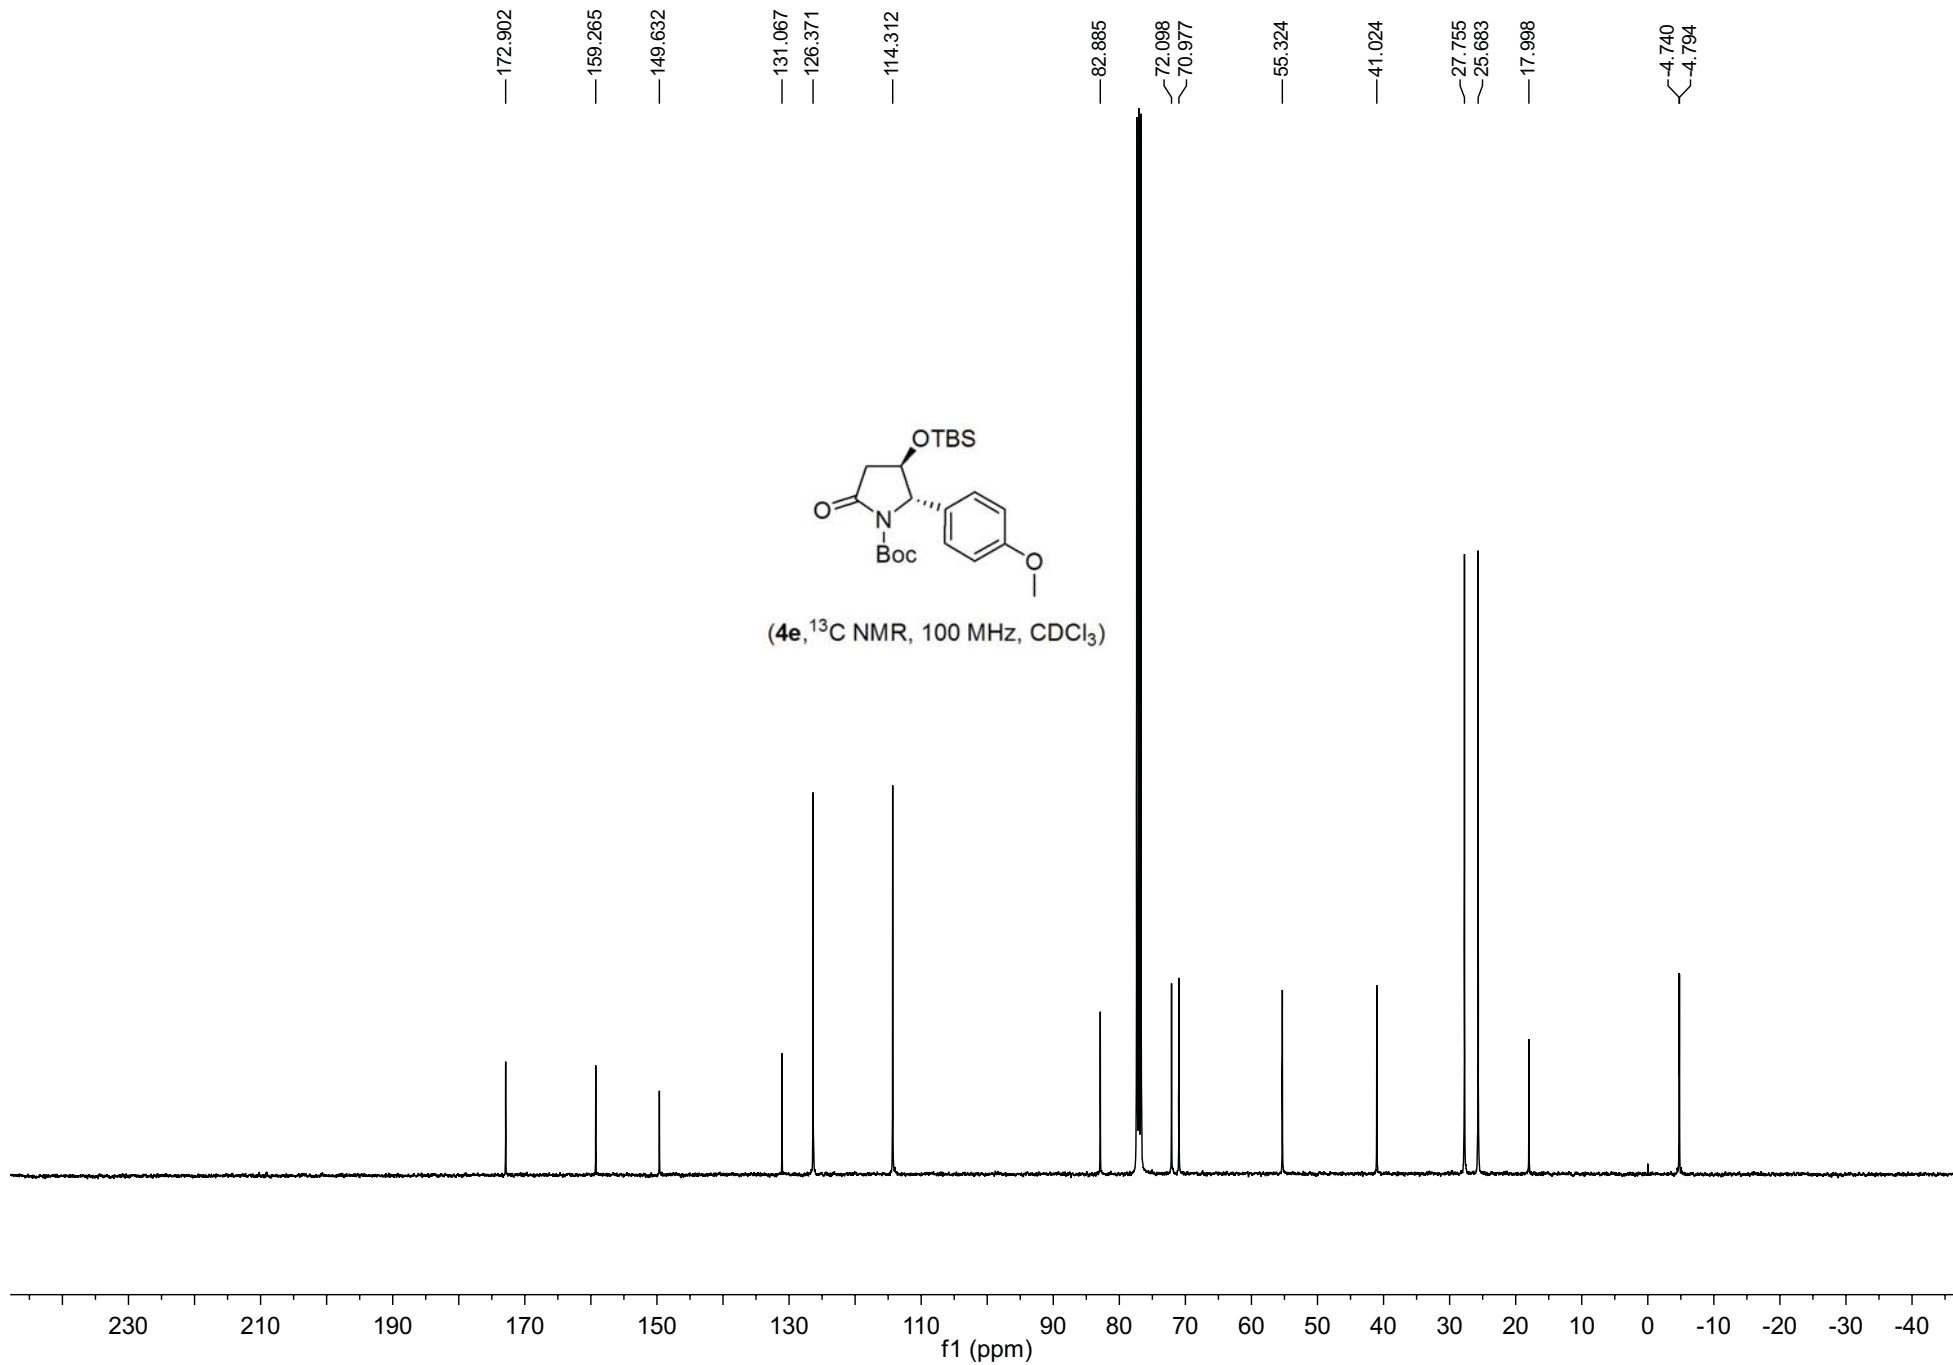

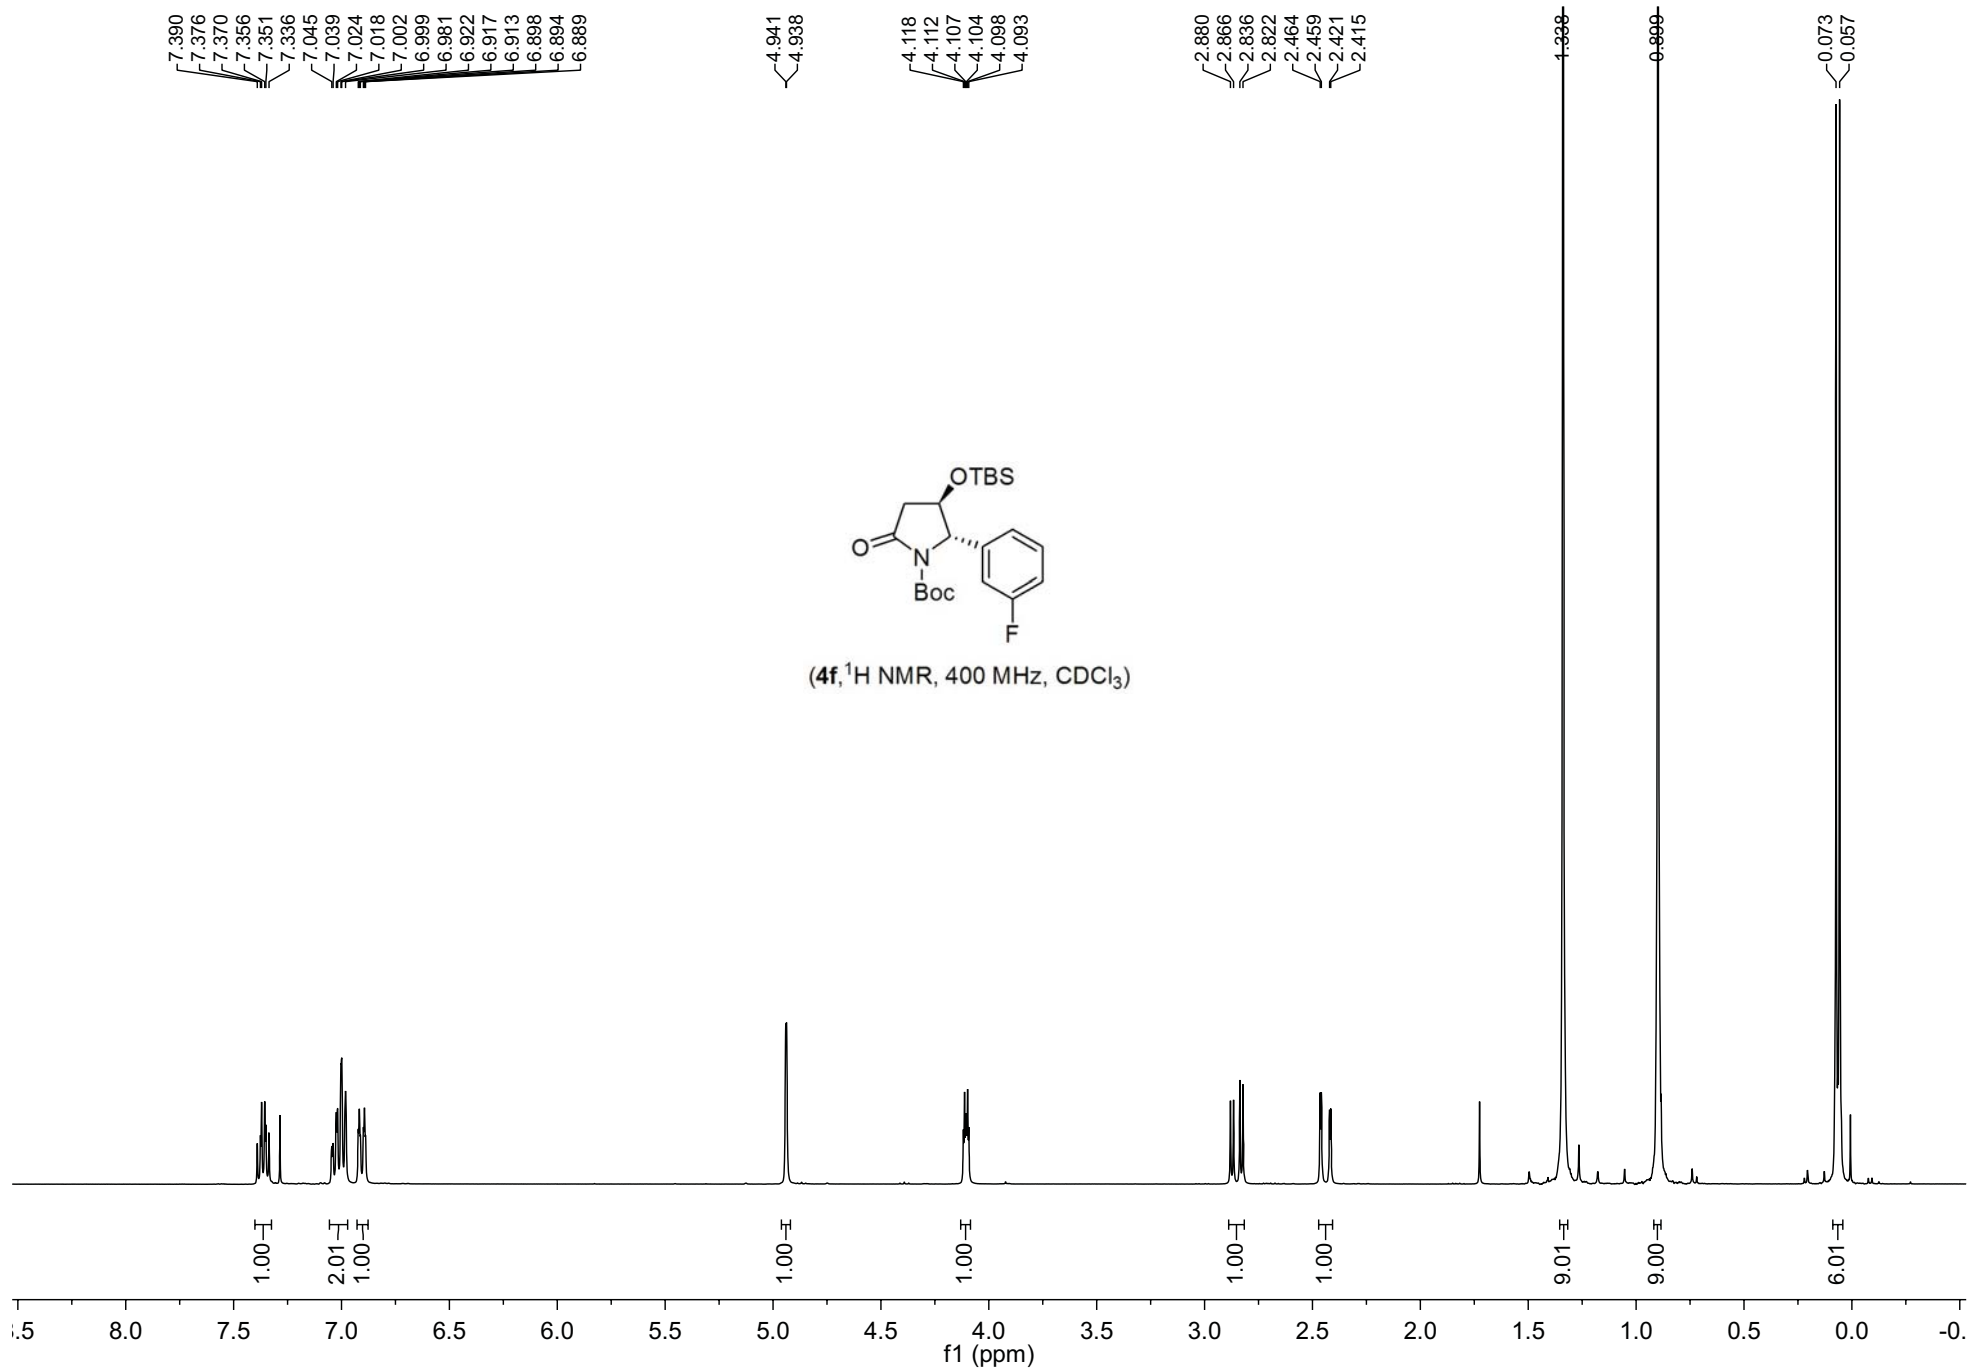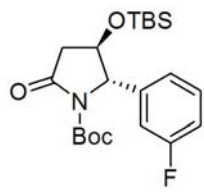

(4f, <sup>1</sup>H NMR, 400 MHz, CDCl<sub>3</sub>)

—172.377  
—164.428  
—161.967  
—149.414  
—141.891  
—141.824  
—130.737  
—130.655  
—120.763  
—120.741  
—115.033  
—114.823  
—112.474  
—112.252  
—83.250  
—71.851  
—70.863  
—40.992  
—27.733  
—25.636  
—17.951  
—4.520  
—4.801  
—5.082

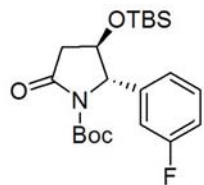

(4f, <sup>13</sup>C NMR, 100 MHz, CDCl<sub>3</sub>)

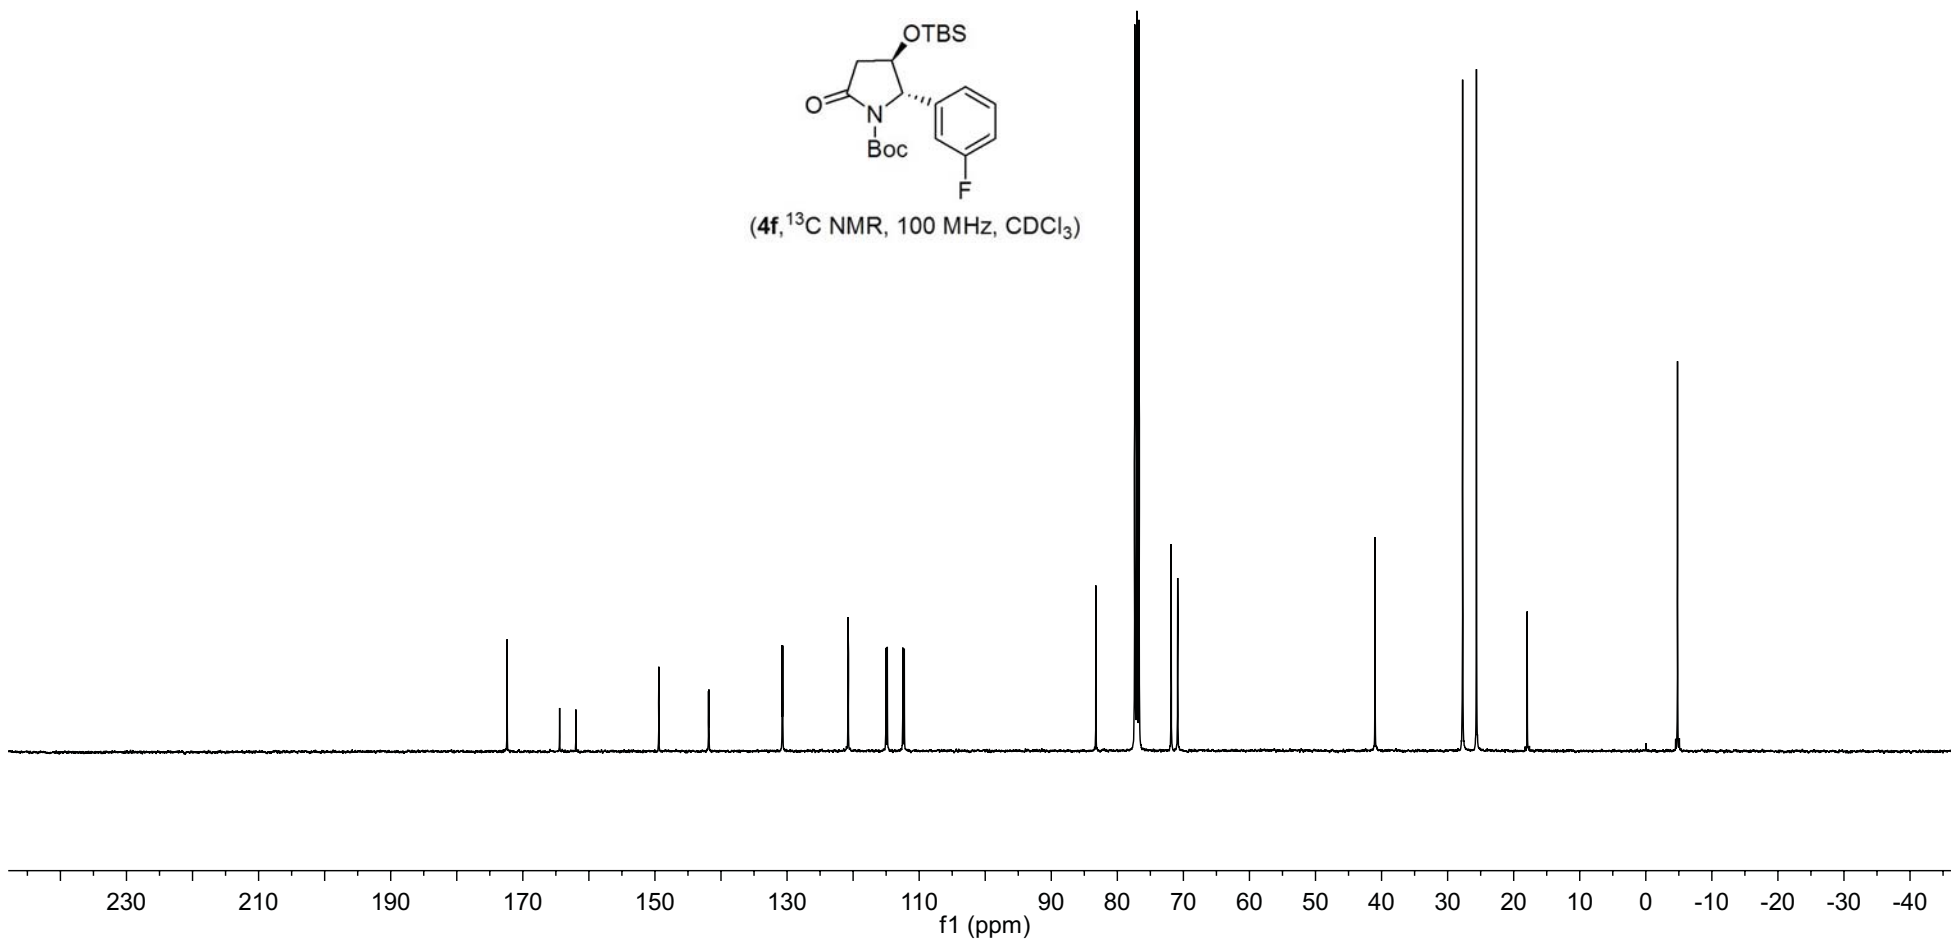

---111.815

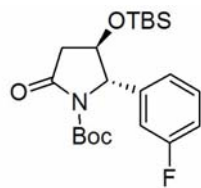

(4f,  $^{19}\text{F}$  NMR, 376 MHz,  $\text{CDCl}_3$ )

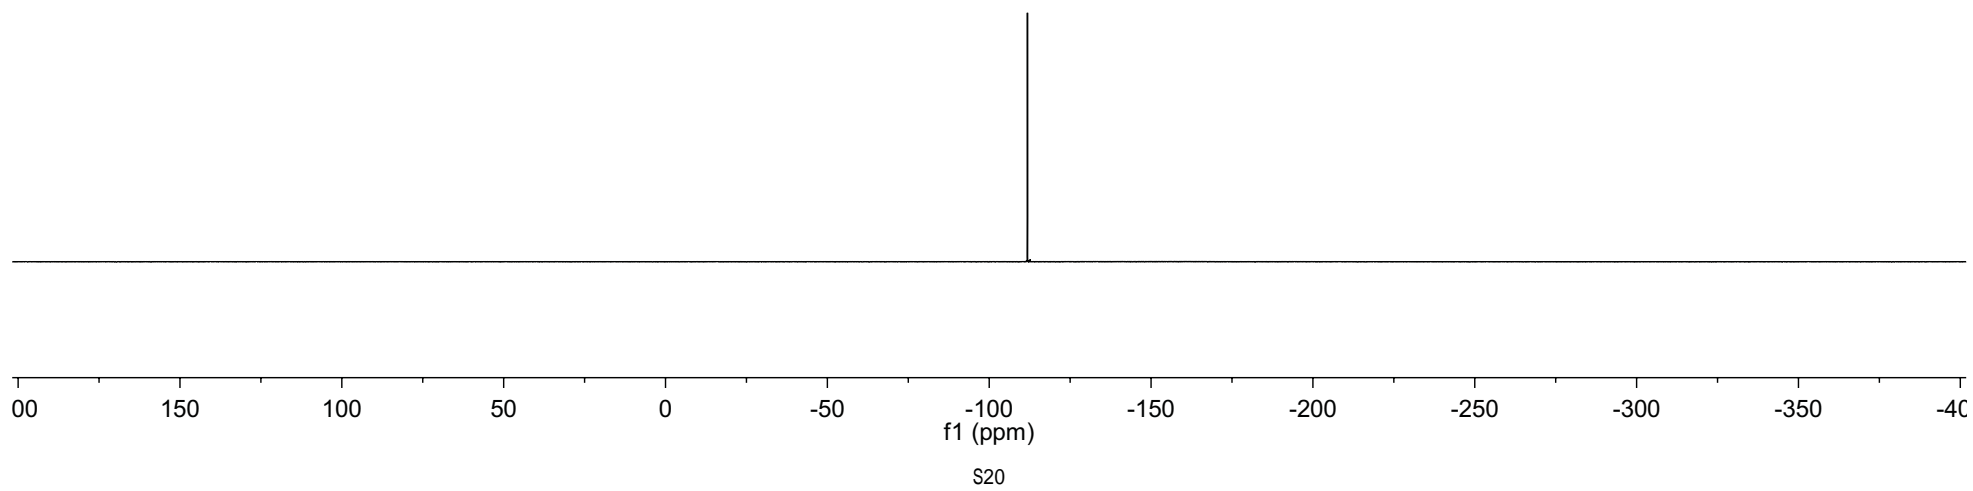

7.285  
7.199  
7.194  
7.186  
7.177  
7.169  
7.164  
7.117  
7.110  
7.105  
7.089  
7.072  
7.067

4.937  
4.933

4.098  
4.092  
4.087  
4.084  
4.078  
4.072

2.888  
2.873  
2.844  
2.830  
2.474  
2.468  
2.430  
2.425

1.335

0.904

0.064  
0.054

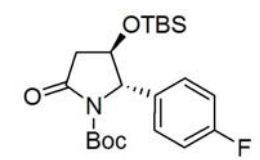

(4i, <sup>1</sup>H NMR, 400 MHz, CDCl<sub>3</sub>)

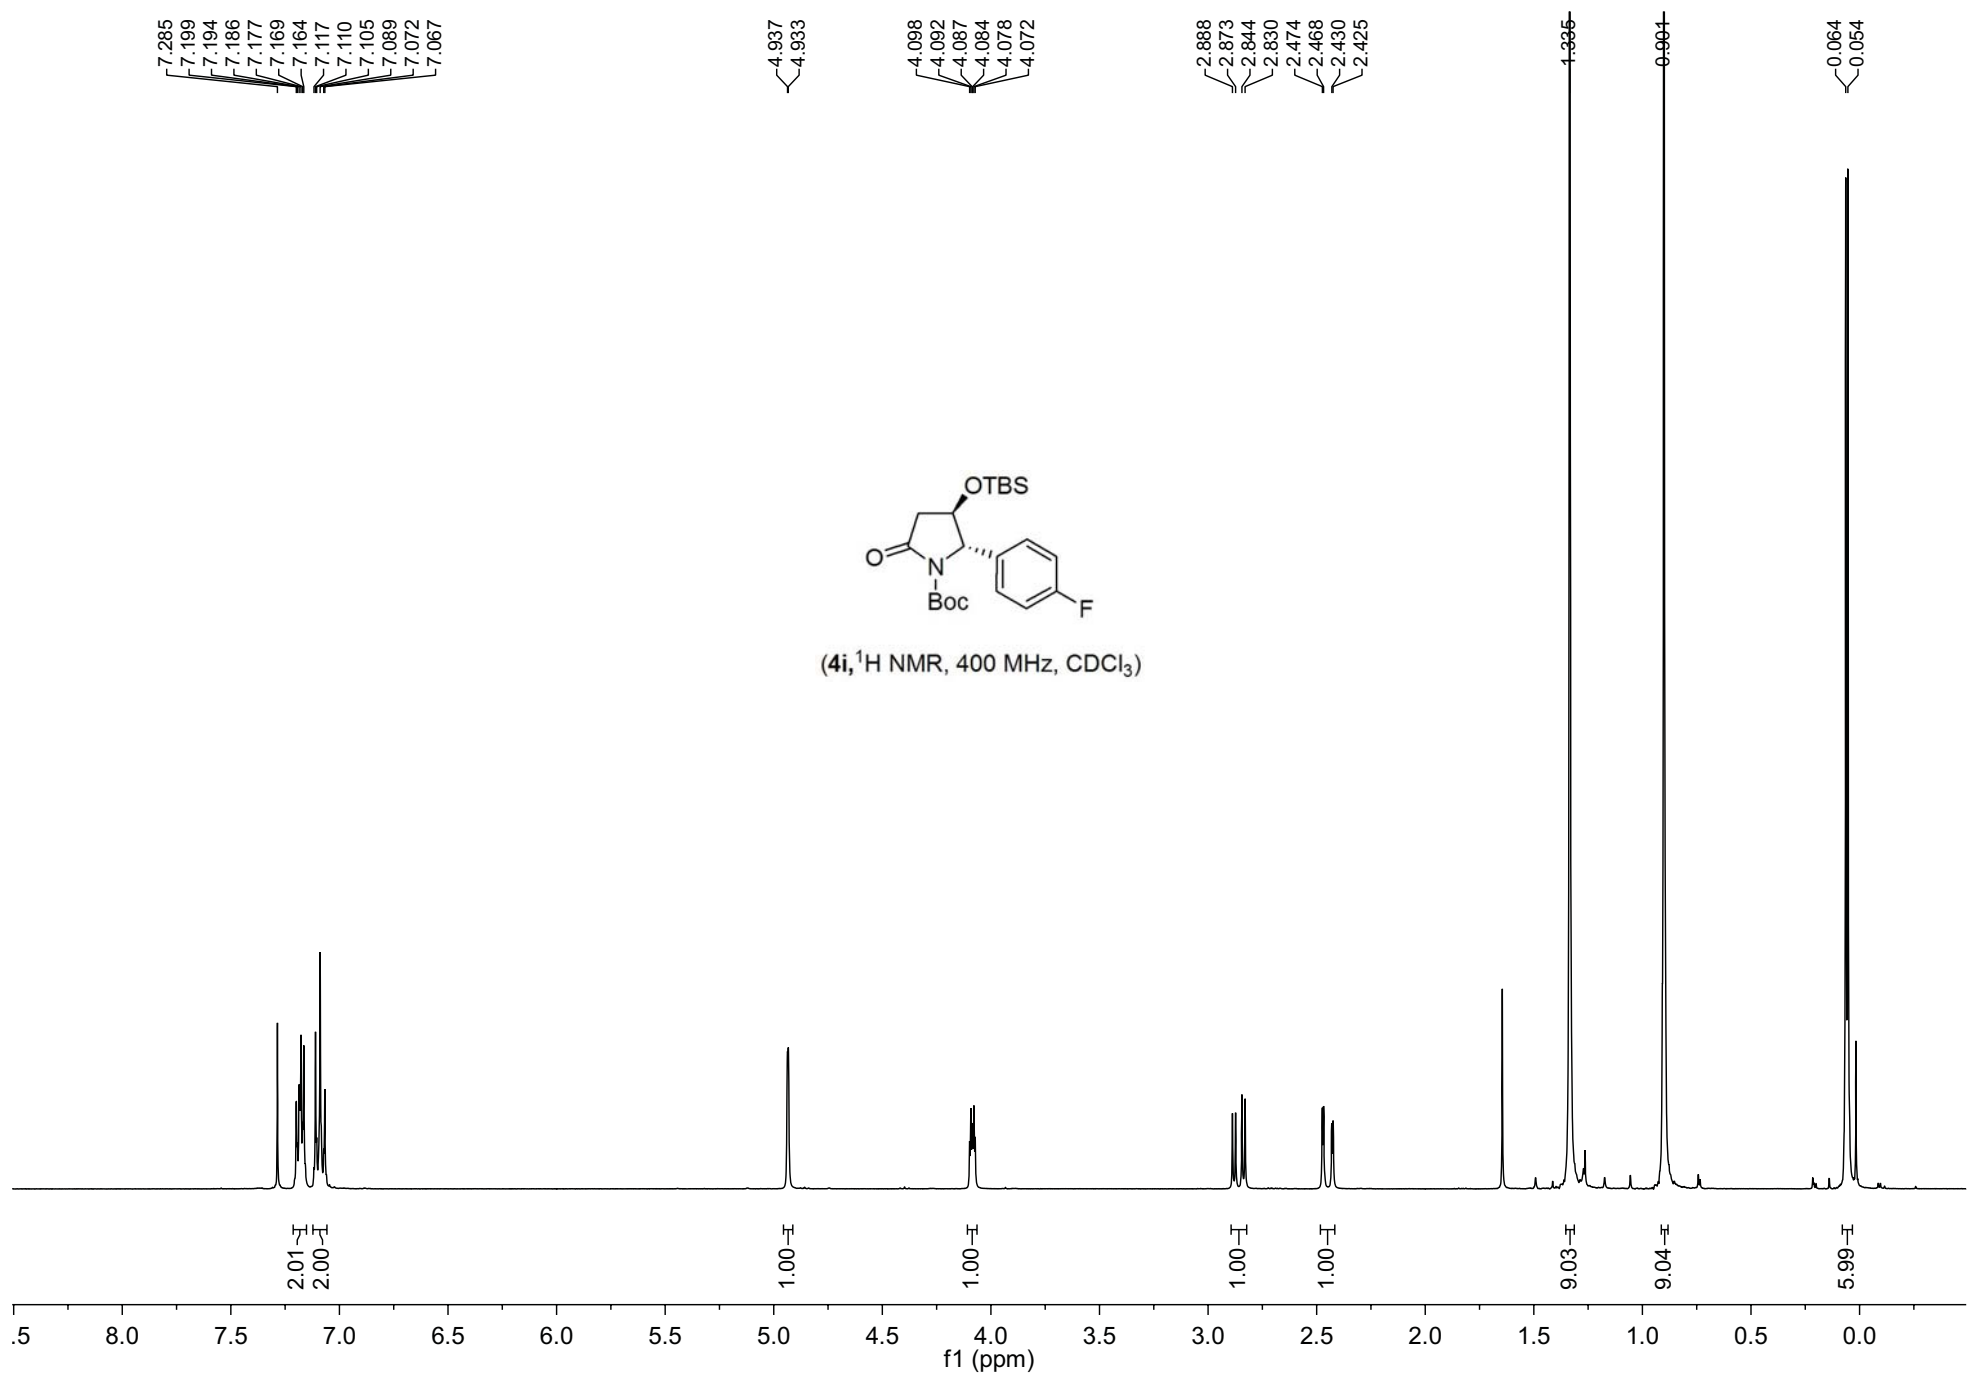

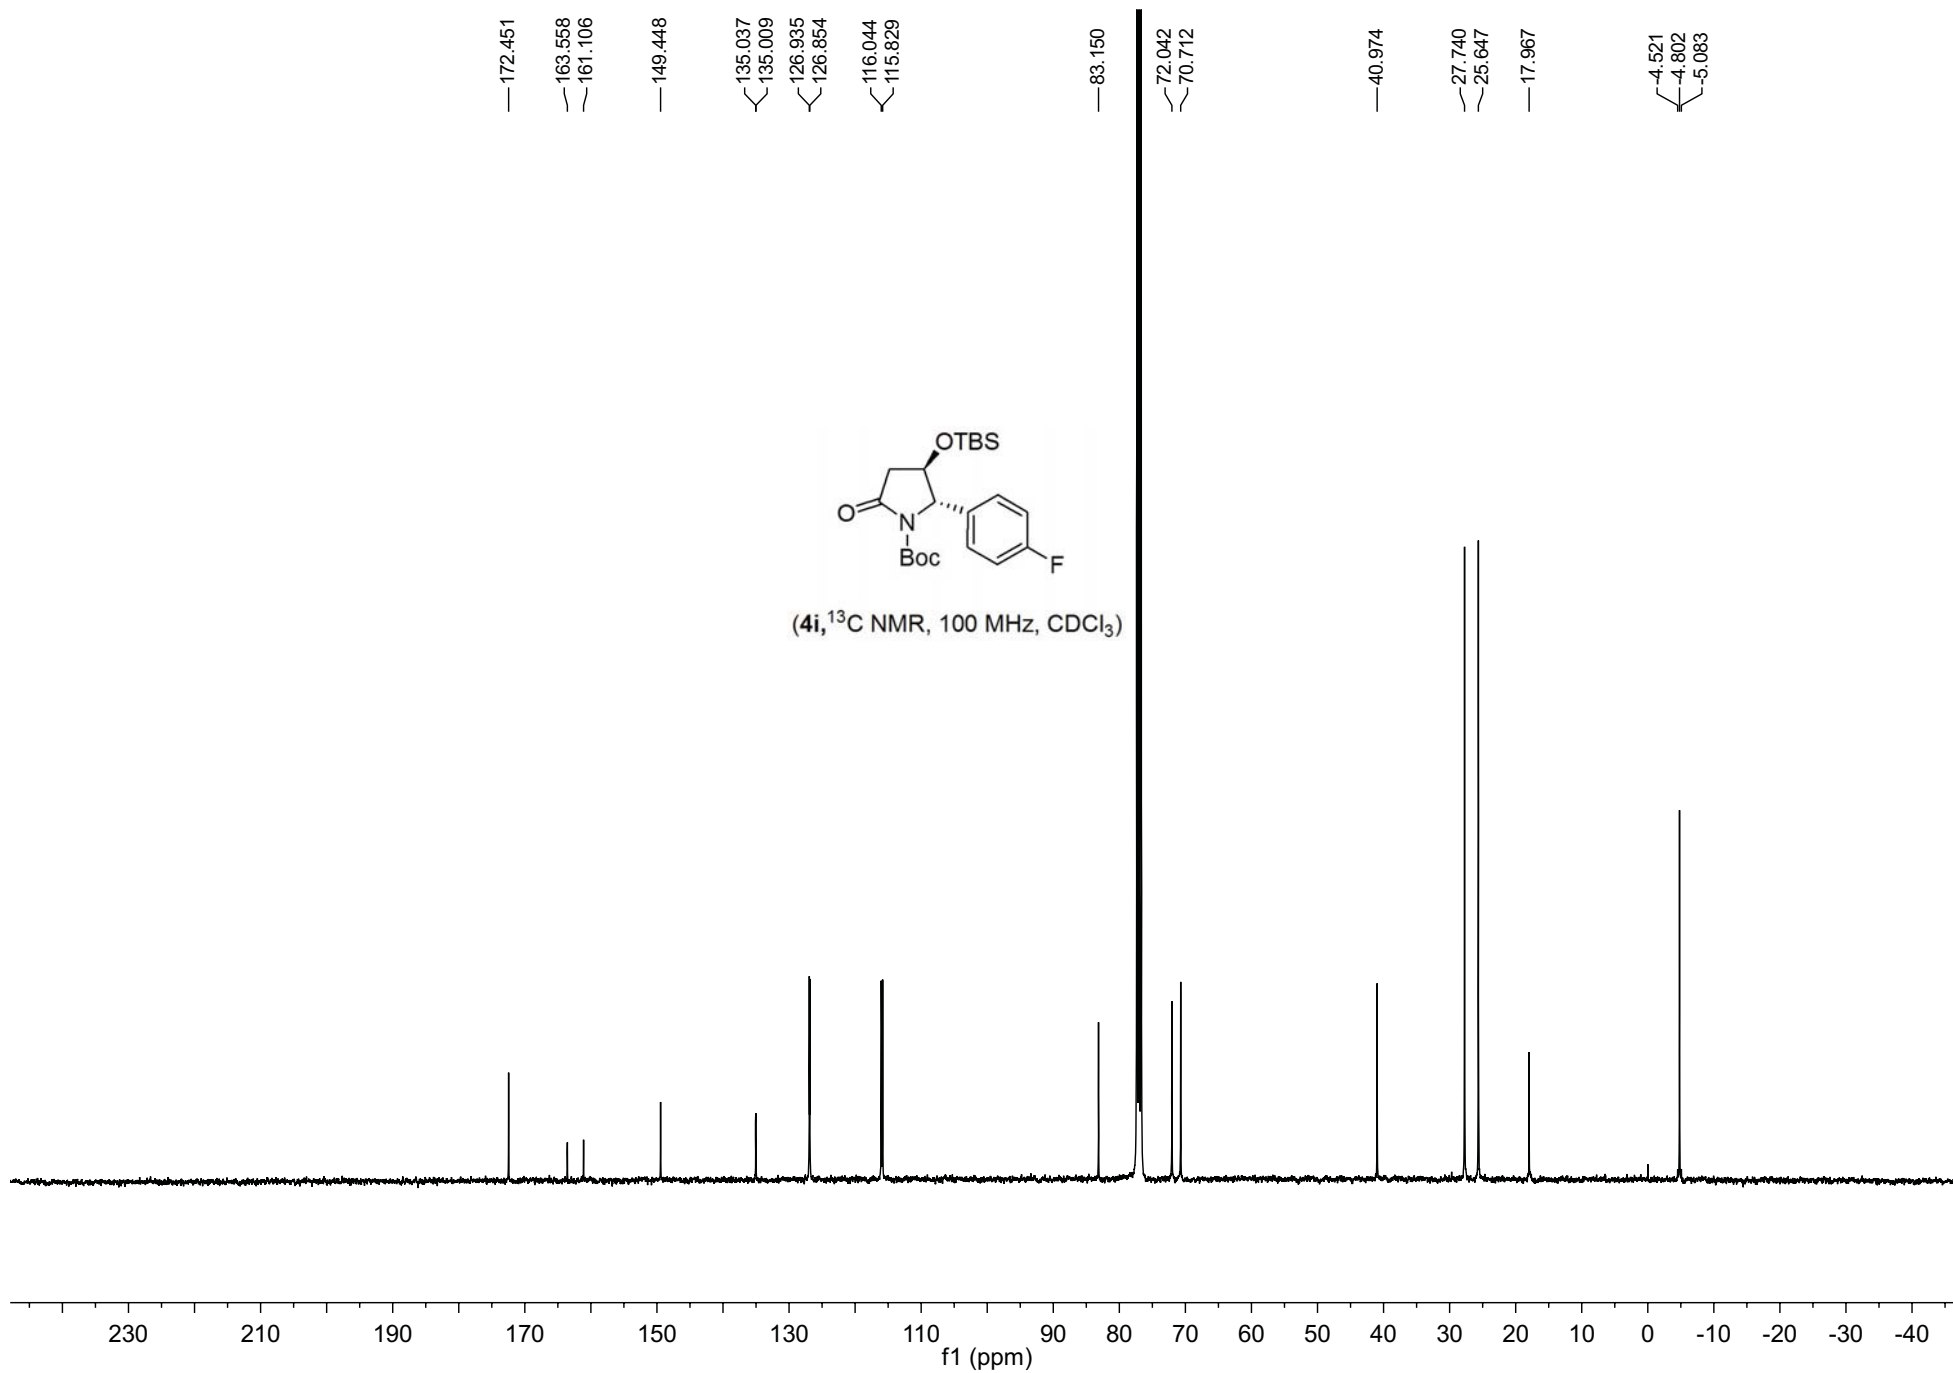

---114.105

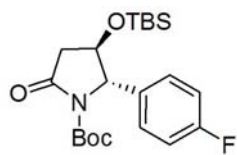

(4i,  $^{19}\text{F}$  NMR, 376 MHz,  $\text{CDCl}_3$ )

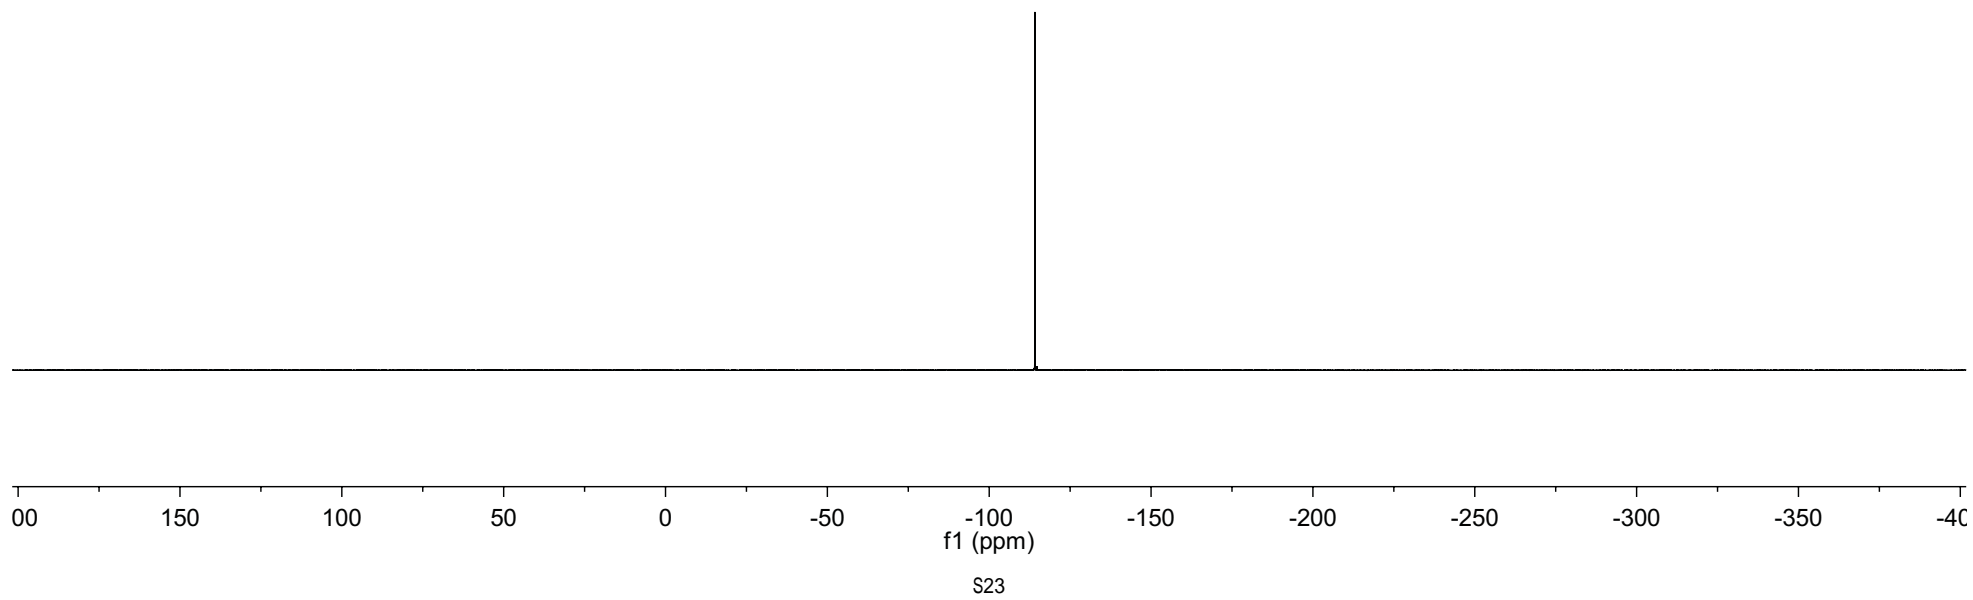

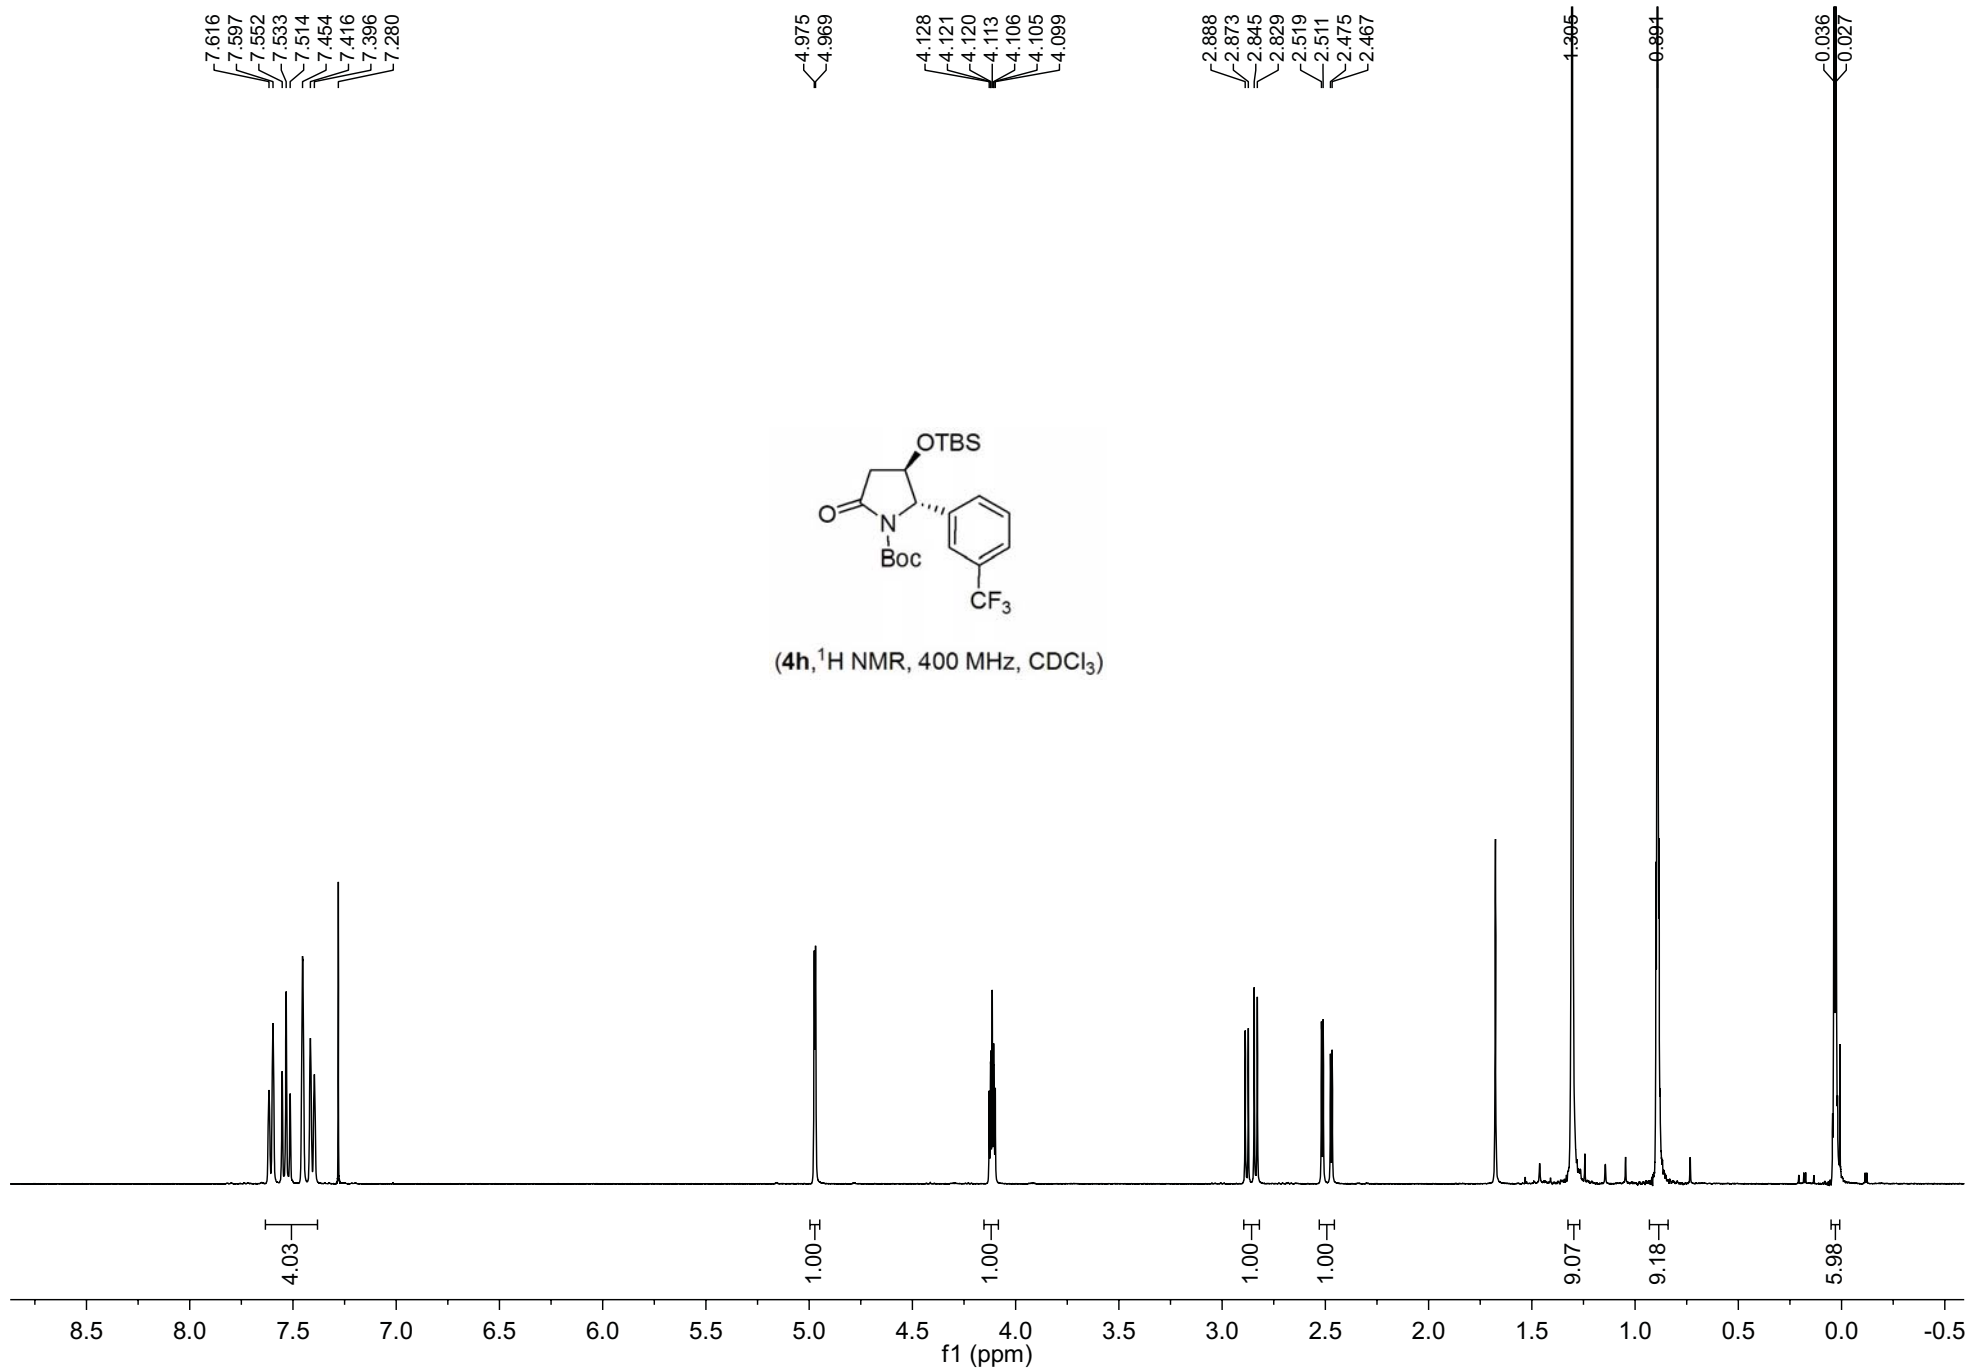



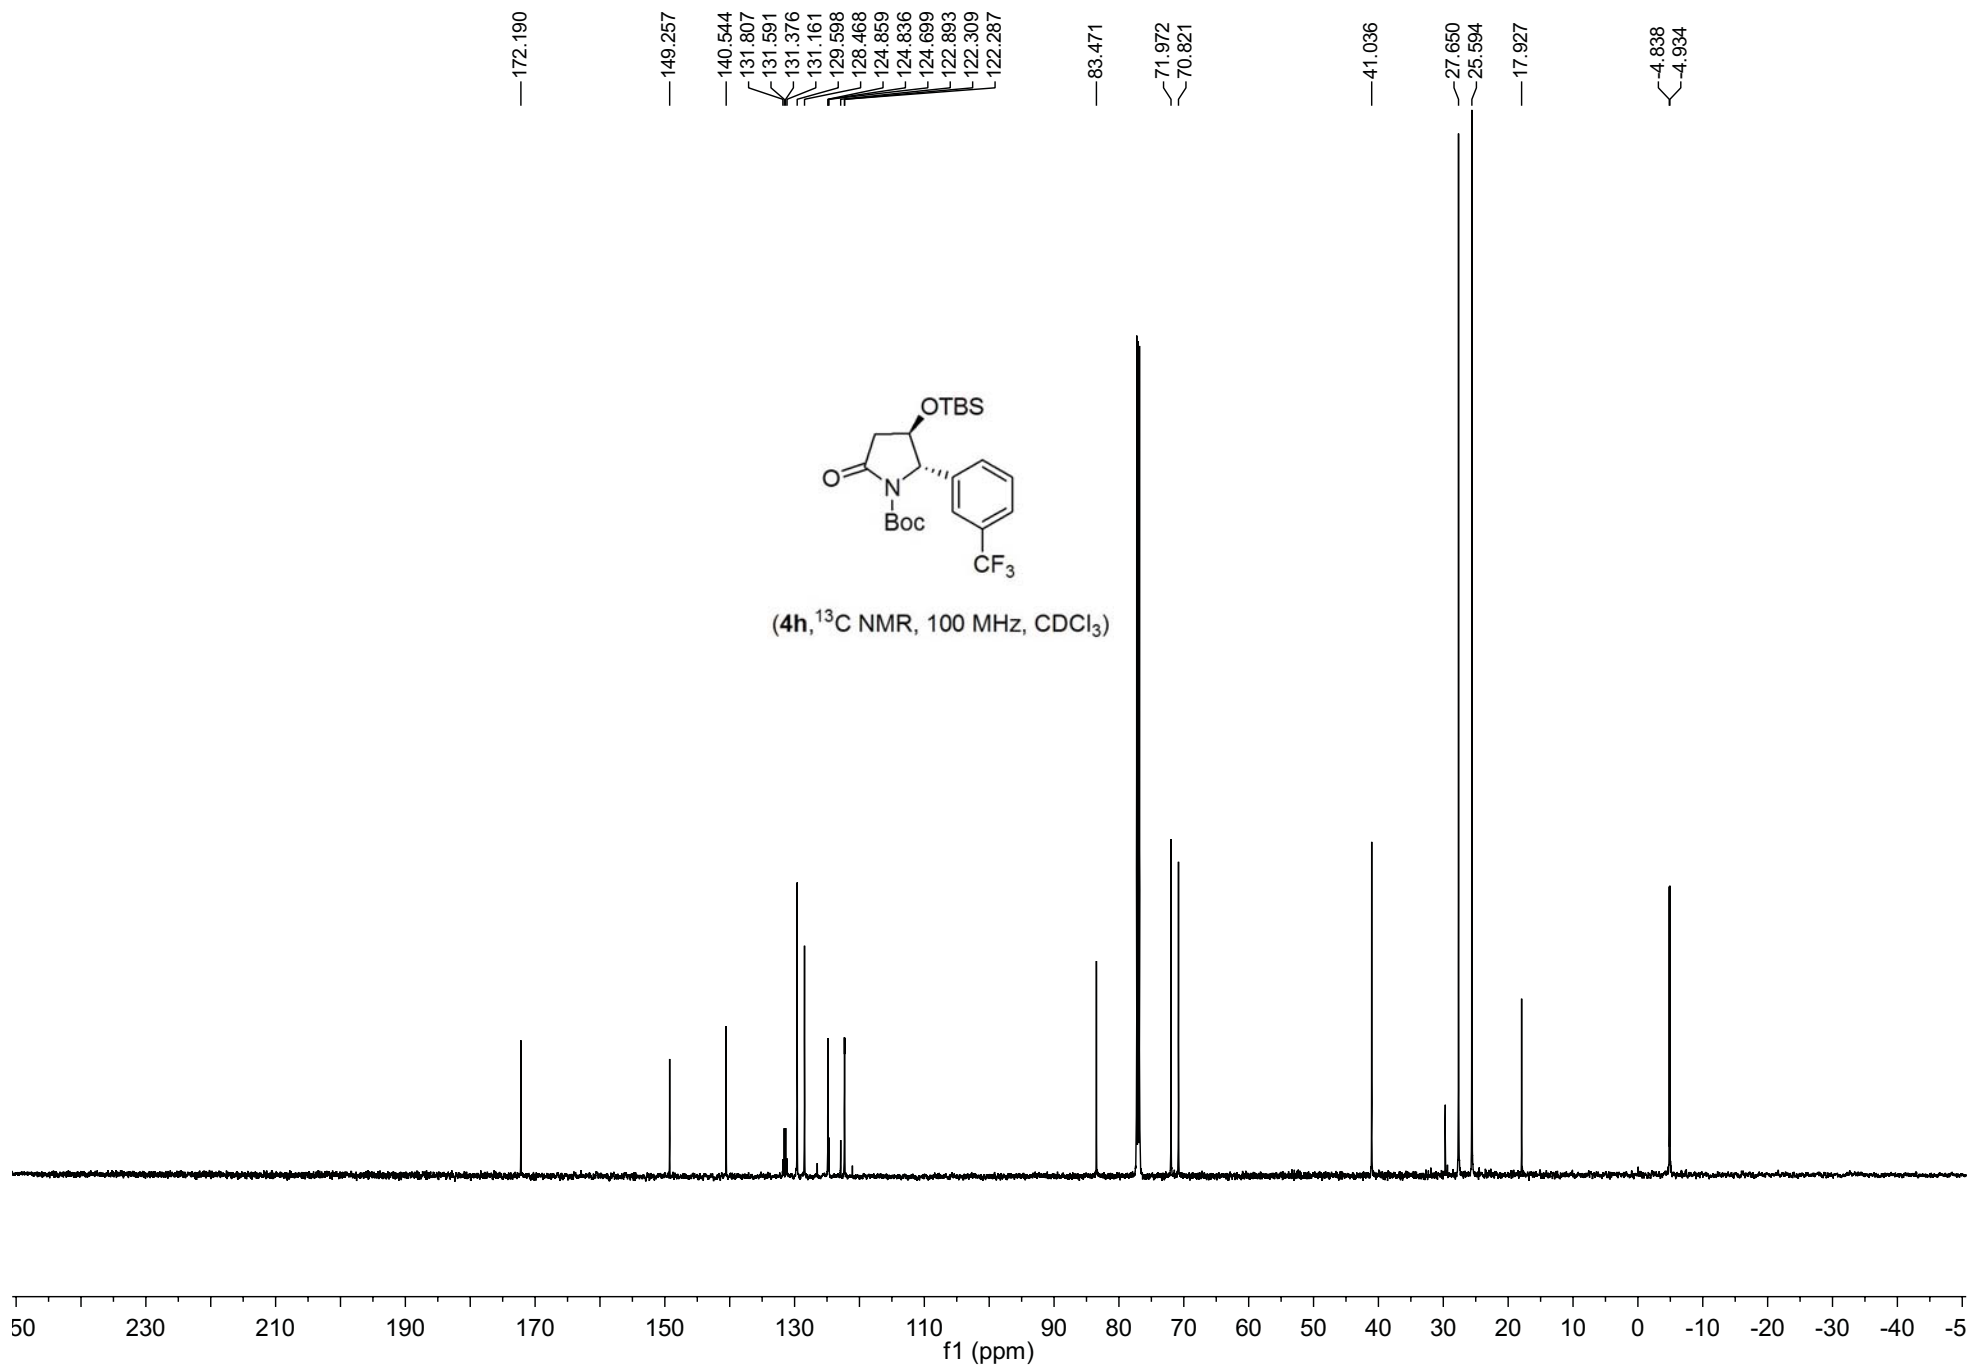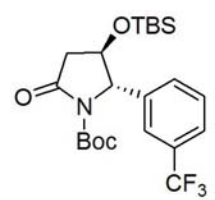

(4h, <sup>13</sup>C NMR, 100 MHz, CDCl<sub>3</sub>)

—62.781

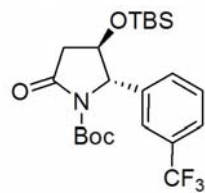

(4h, <sup>19</sup>F NMR, 376 MHz, CDCl<sub>3</sub>)

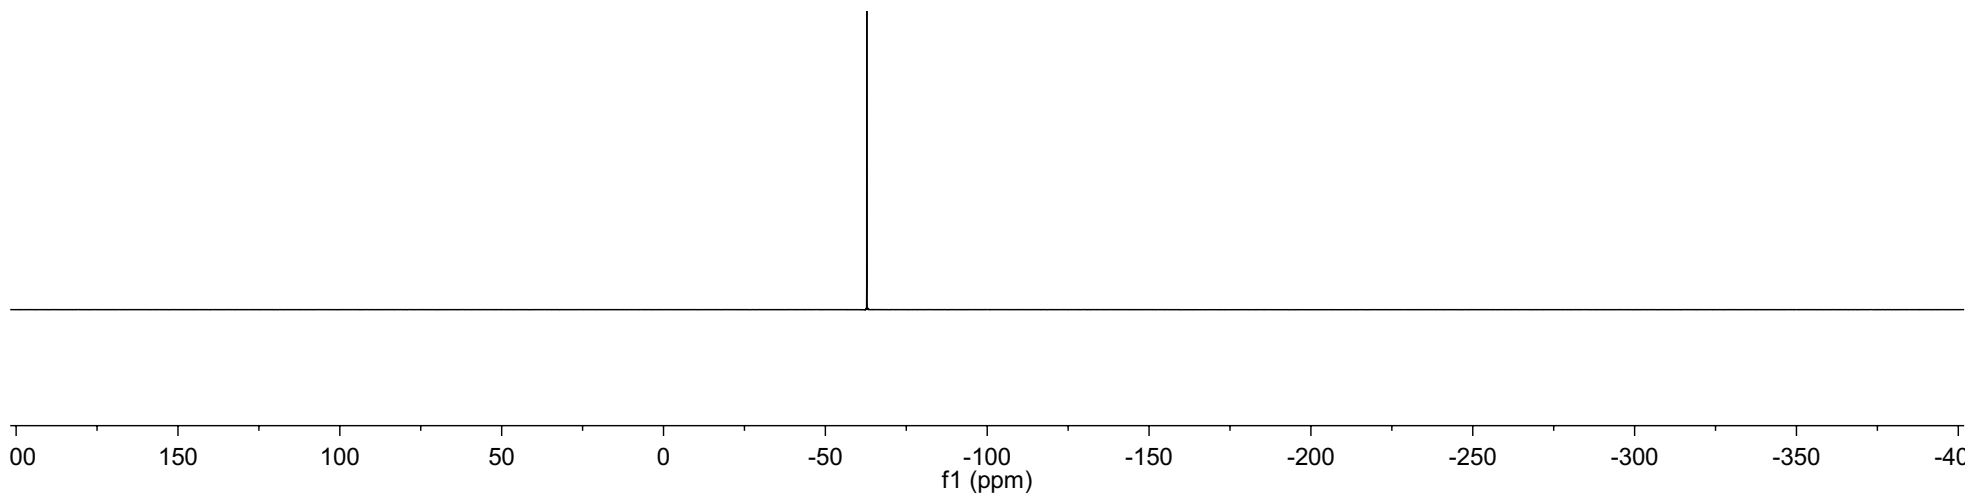

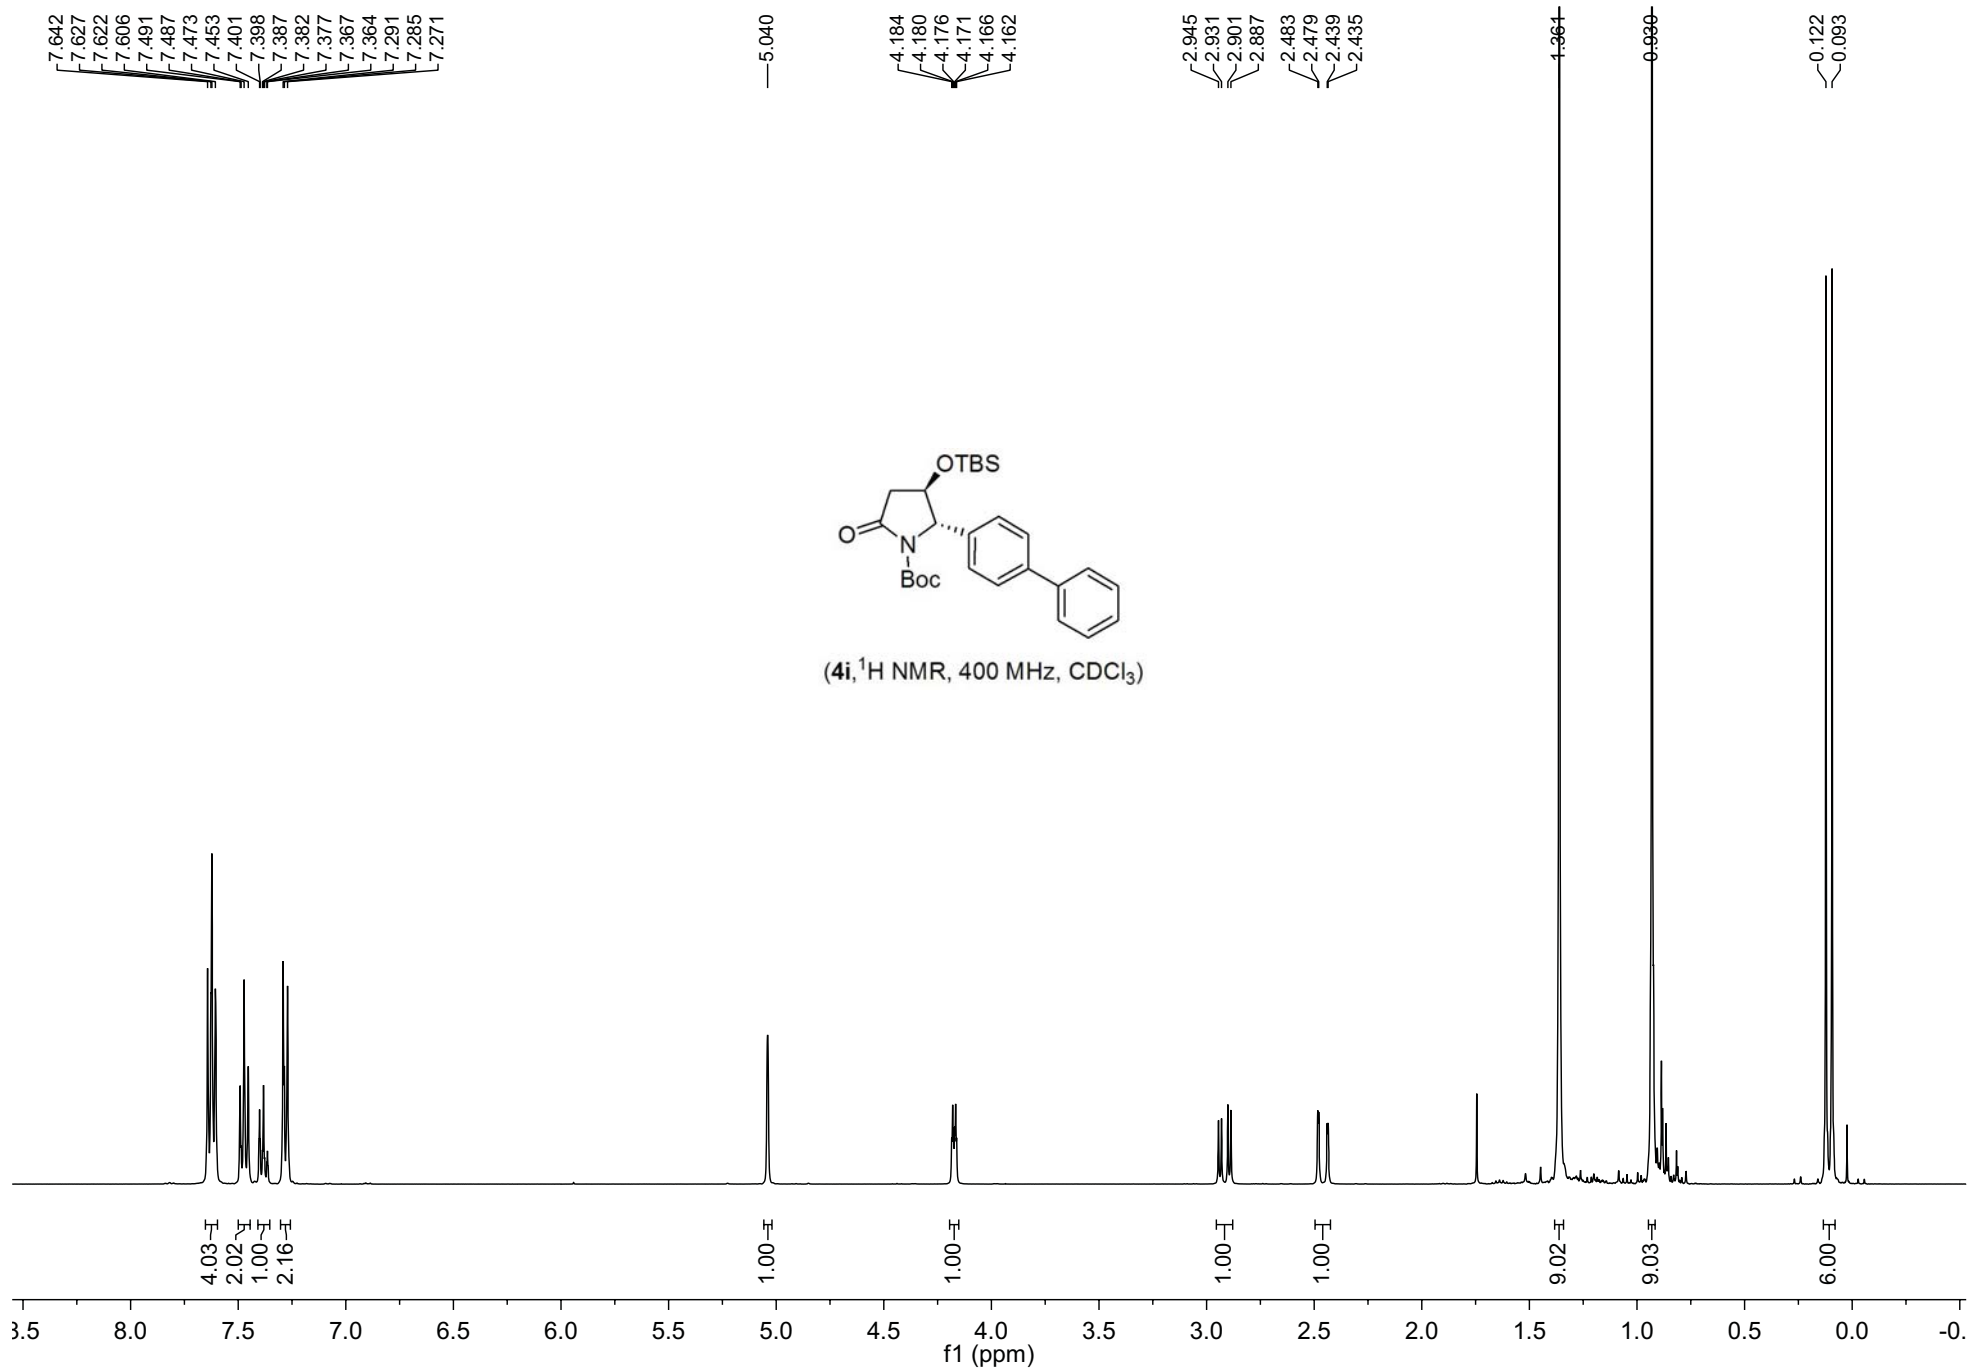

—172.777  
—149.662  
140.928  
140.326  
138.014  
128.867  
127.655  
127.559  
127.020  
125.637  
—83.069  
72.043  
71.203  
—41.097  
27.780  
25.706  
—18.014  
—4.699  
—4.746

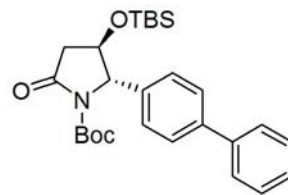

(4i,  $^{13}\text{C}$  NMR, 100 MHz,  $\text{CDCl}_3$ )

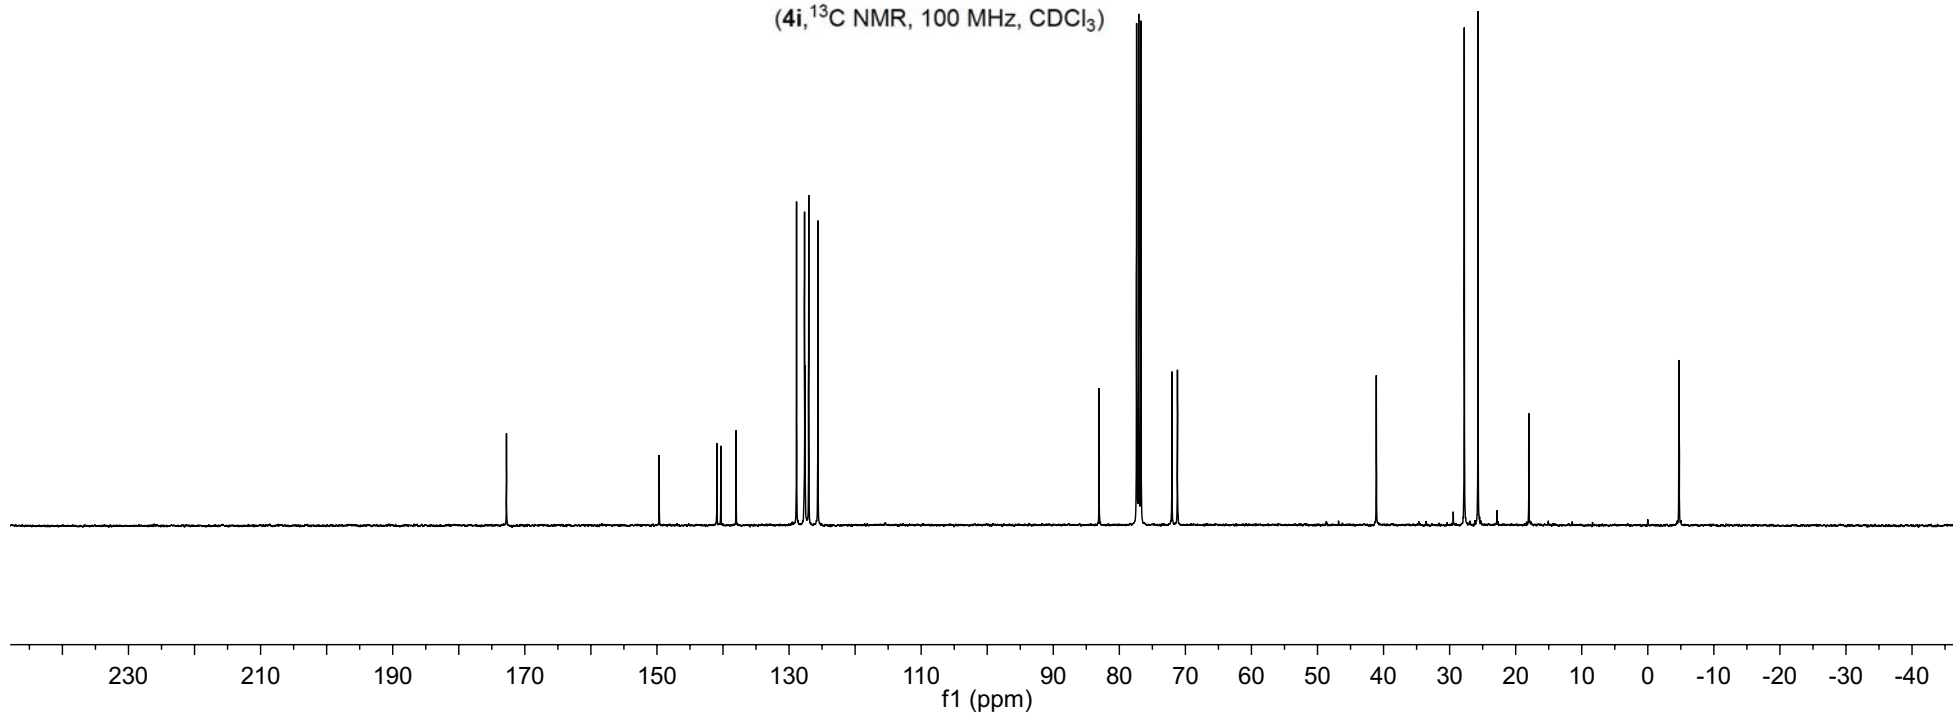

8.066  
8.046  
7.945  
7.925  
7.921  
7.841  
7.820  
7.619  
7.615  
7.602  
7.598  
7.594  
7.583  
7.578  
7.563  
7.560  
7.546  
7.543  
7.469  
7.450  
7.430  
7.280  
7.263  
7.245

5.855

4.250  
4.247  
4.244  
4.236  
4.233  
4.231

2.881  
2.868  
2.837  
2.824  
2.450  
2.406

1.257

0.963

0.104

0.043

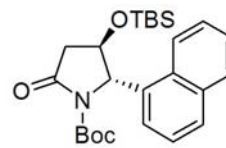

(4j), <sup>1</sup>H NMR, 400 MHz, CDCl<sub>3</sub>

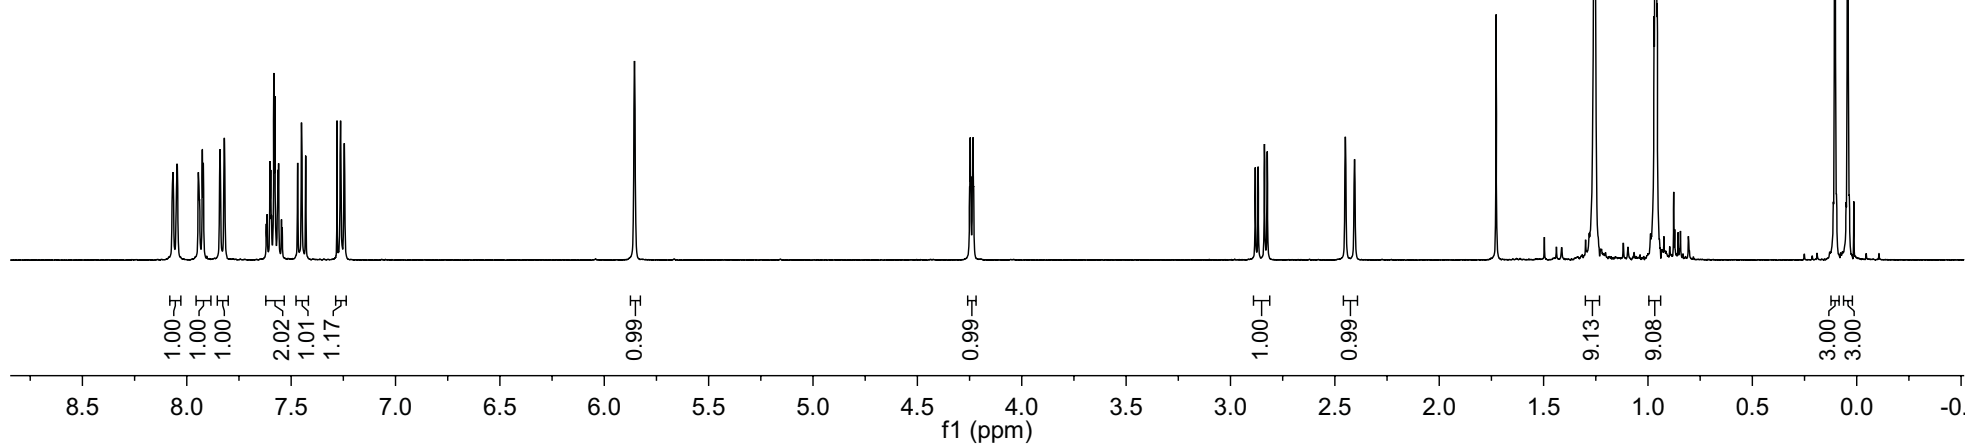

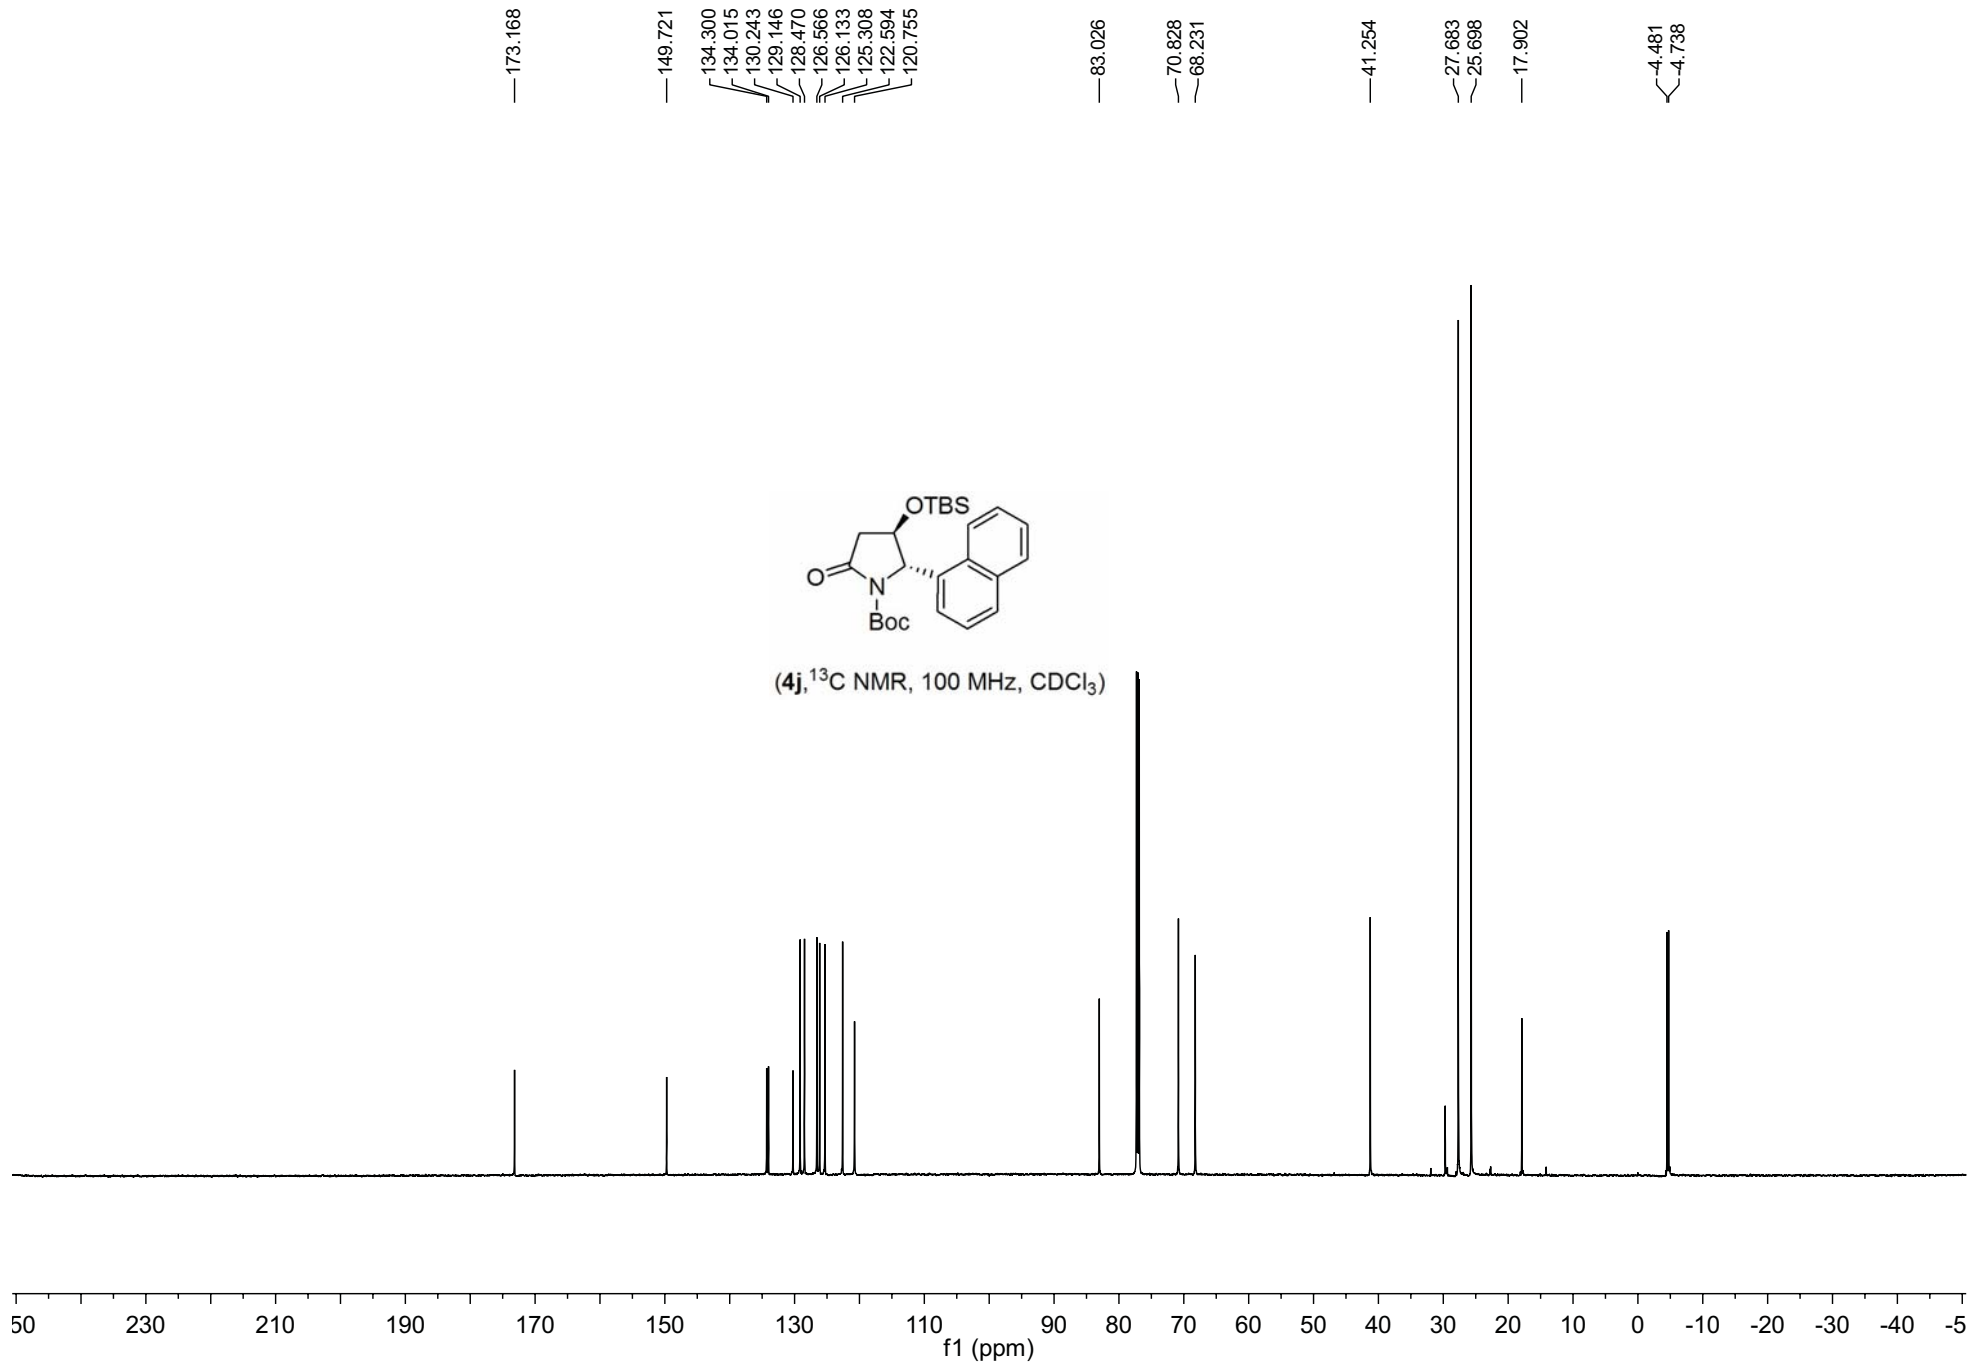

7.908  
7.887  
7.868  
7.859  
7.850  
7.842  
7.833  
7.819  
7.624  
7.555  
7.543  
7.538  
7.529  
7.520  
7.515  
7.503  
7.350  
7.346  
7.329  
7.325

5.160

4.215  
4.211  
4.207  
4.202  
4.197  
4.193

2.965  
2.951  
2.922  
2.908  
2.495  
2.491  
2.451  
2.447

1.307

0.990

0.113  
0.083

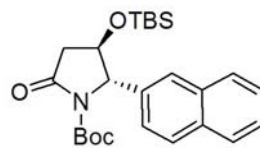

(4k, <sup>1</sup>H NMR, 400 MHz, CDCl<sub>3</sub>)

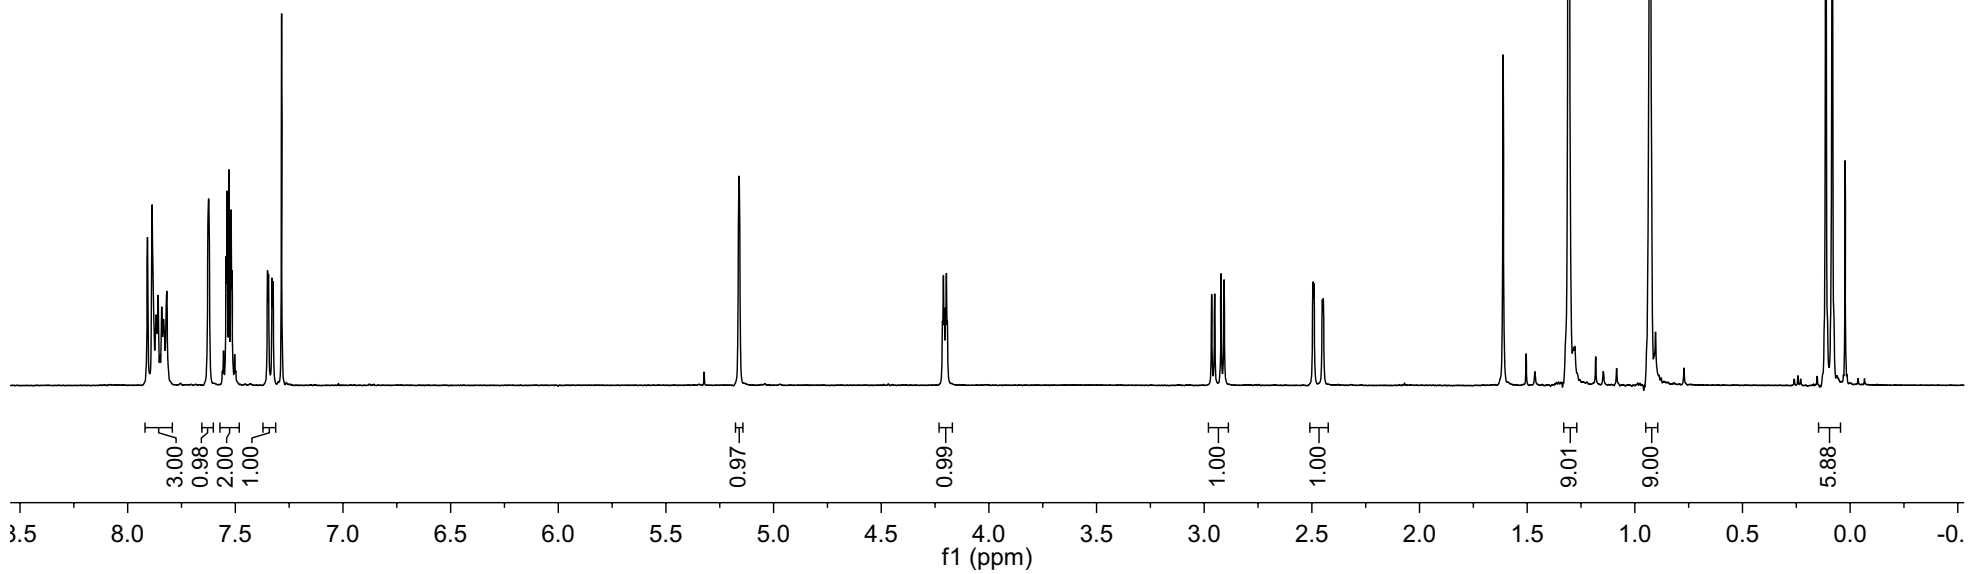

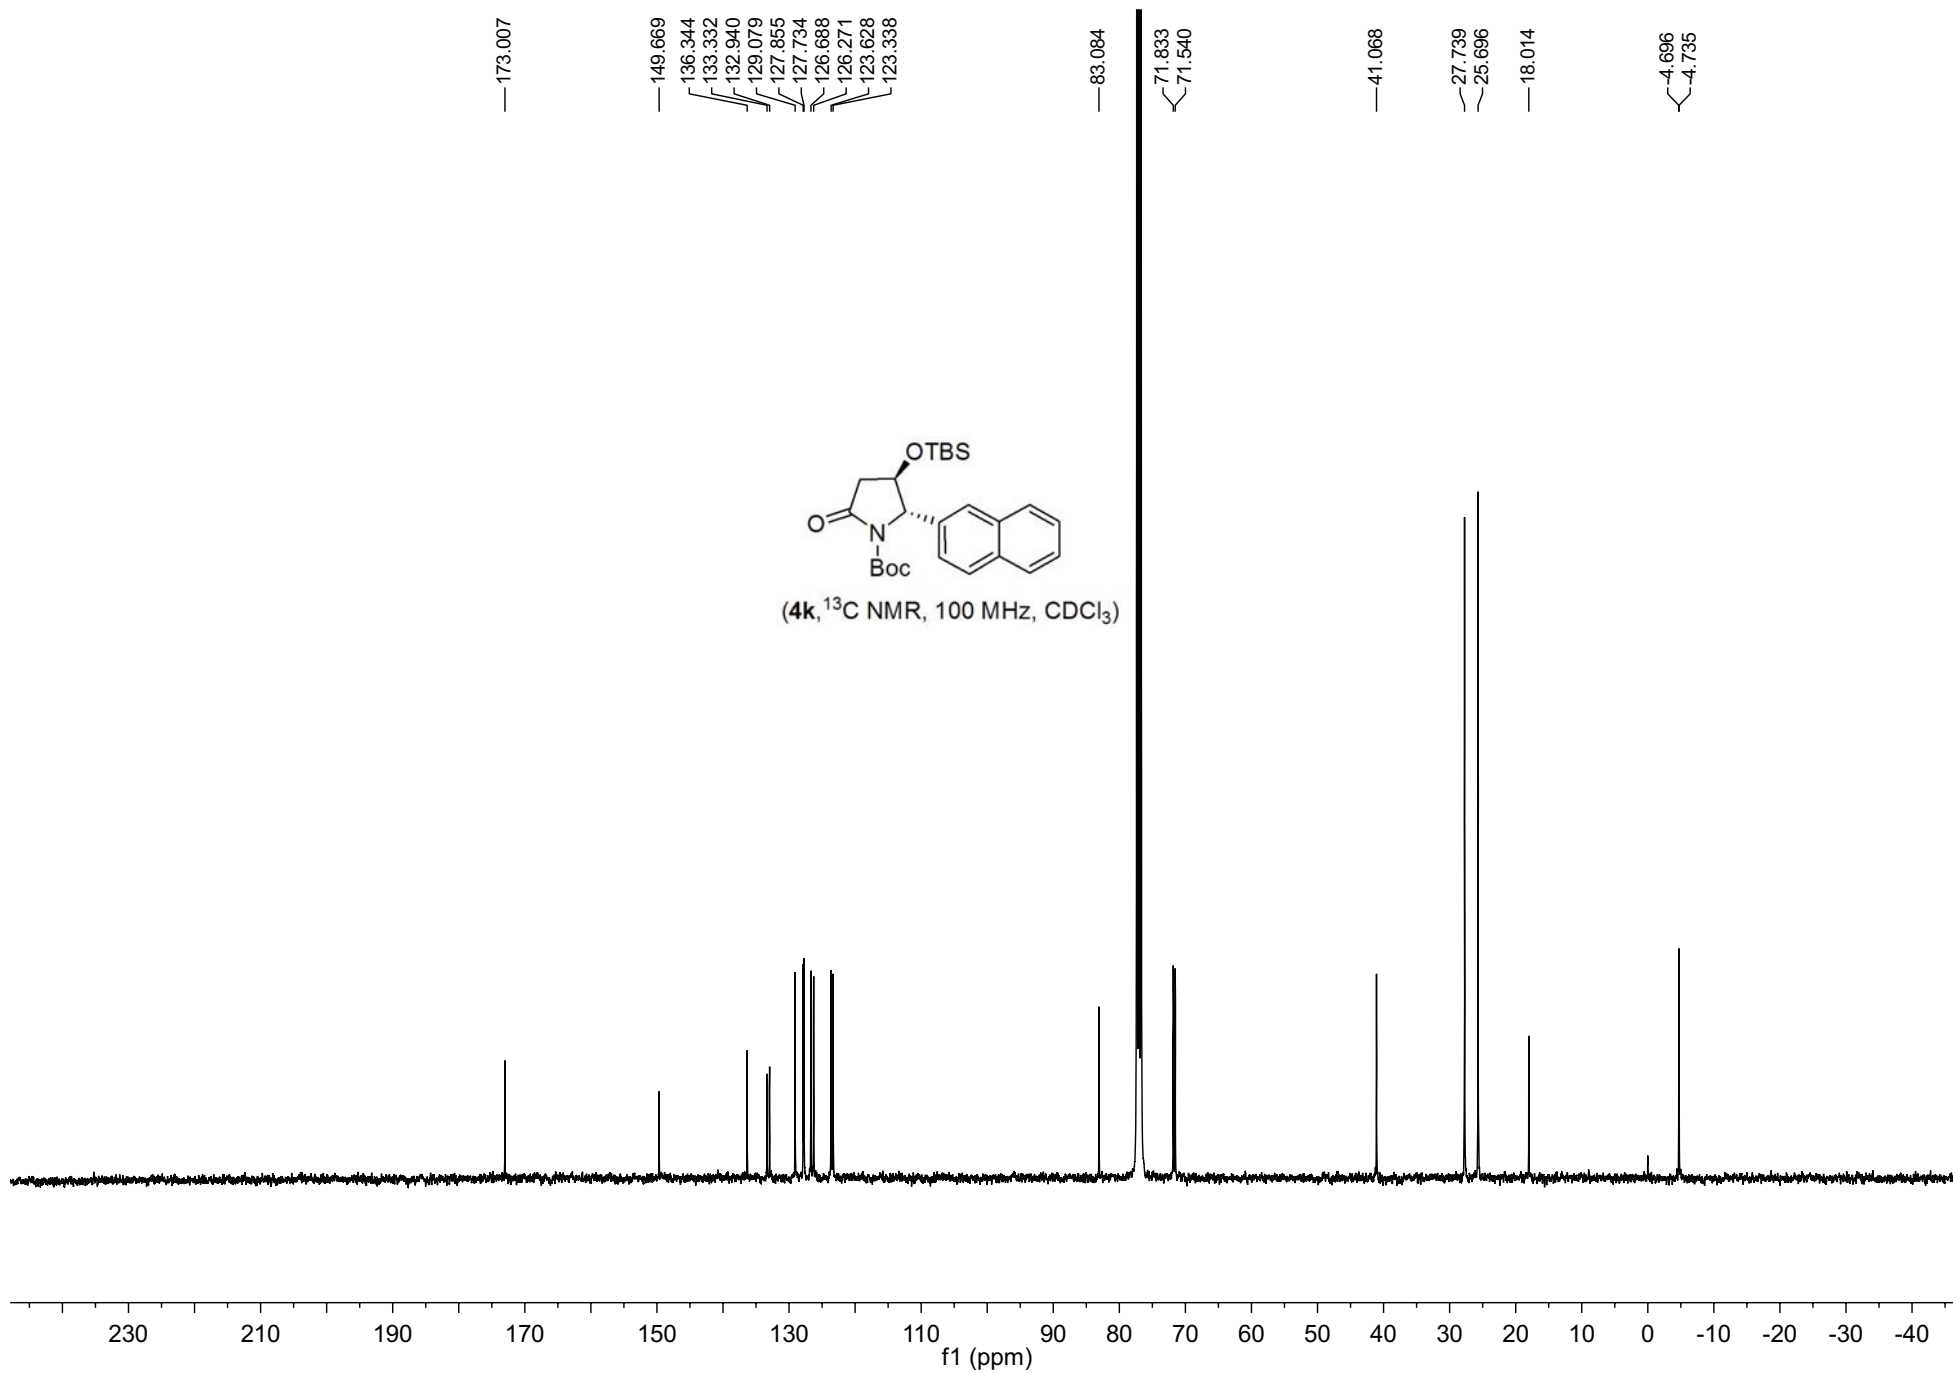



—7.218

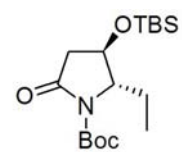

(41, <sup>1</sup>H NMR, 400 MHz, CDCl<sub>3</sub>)

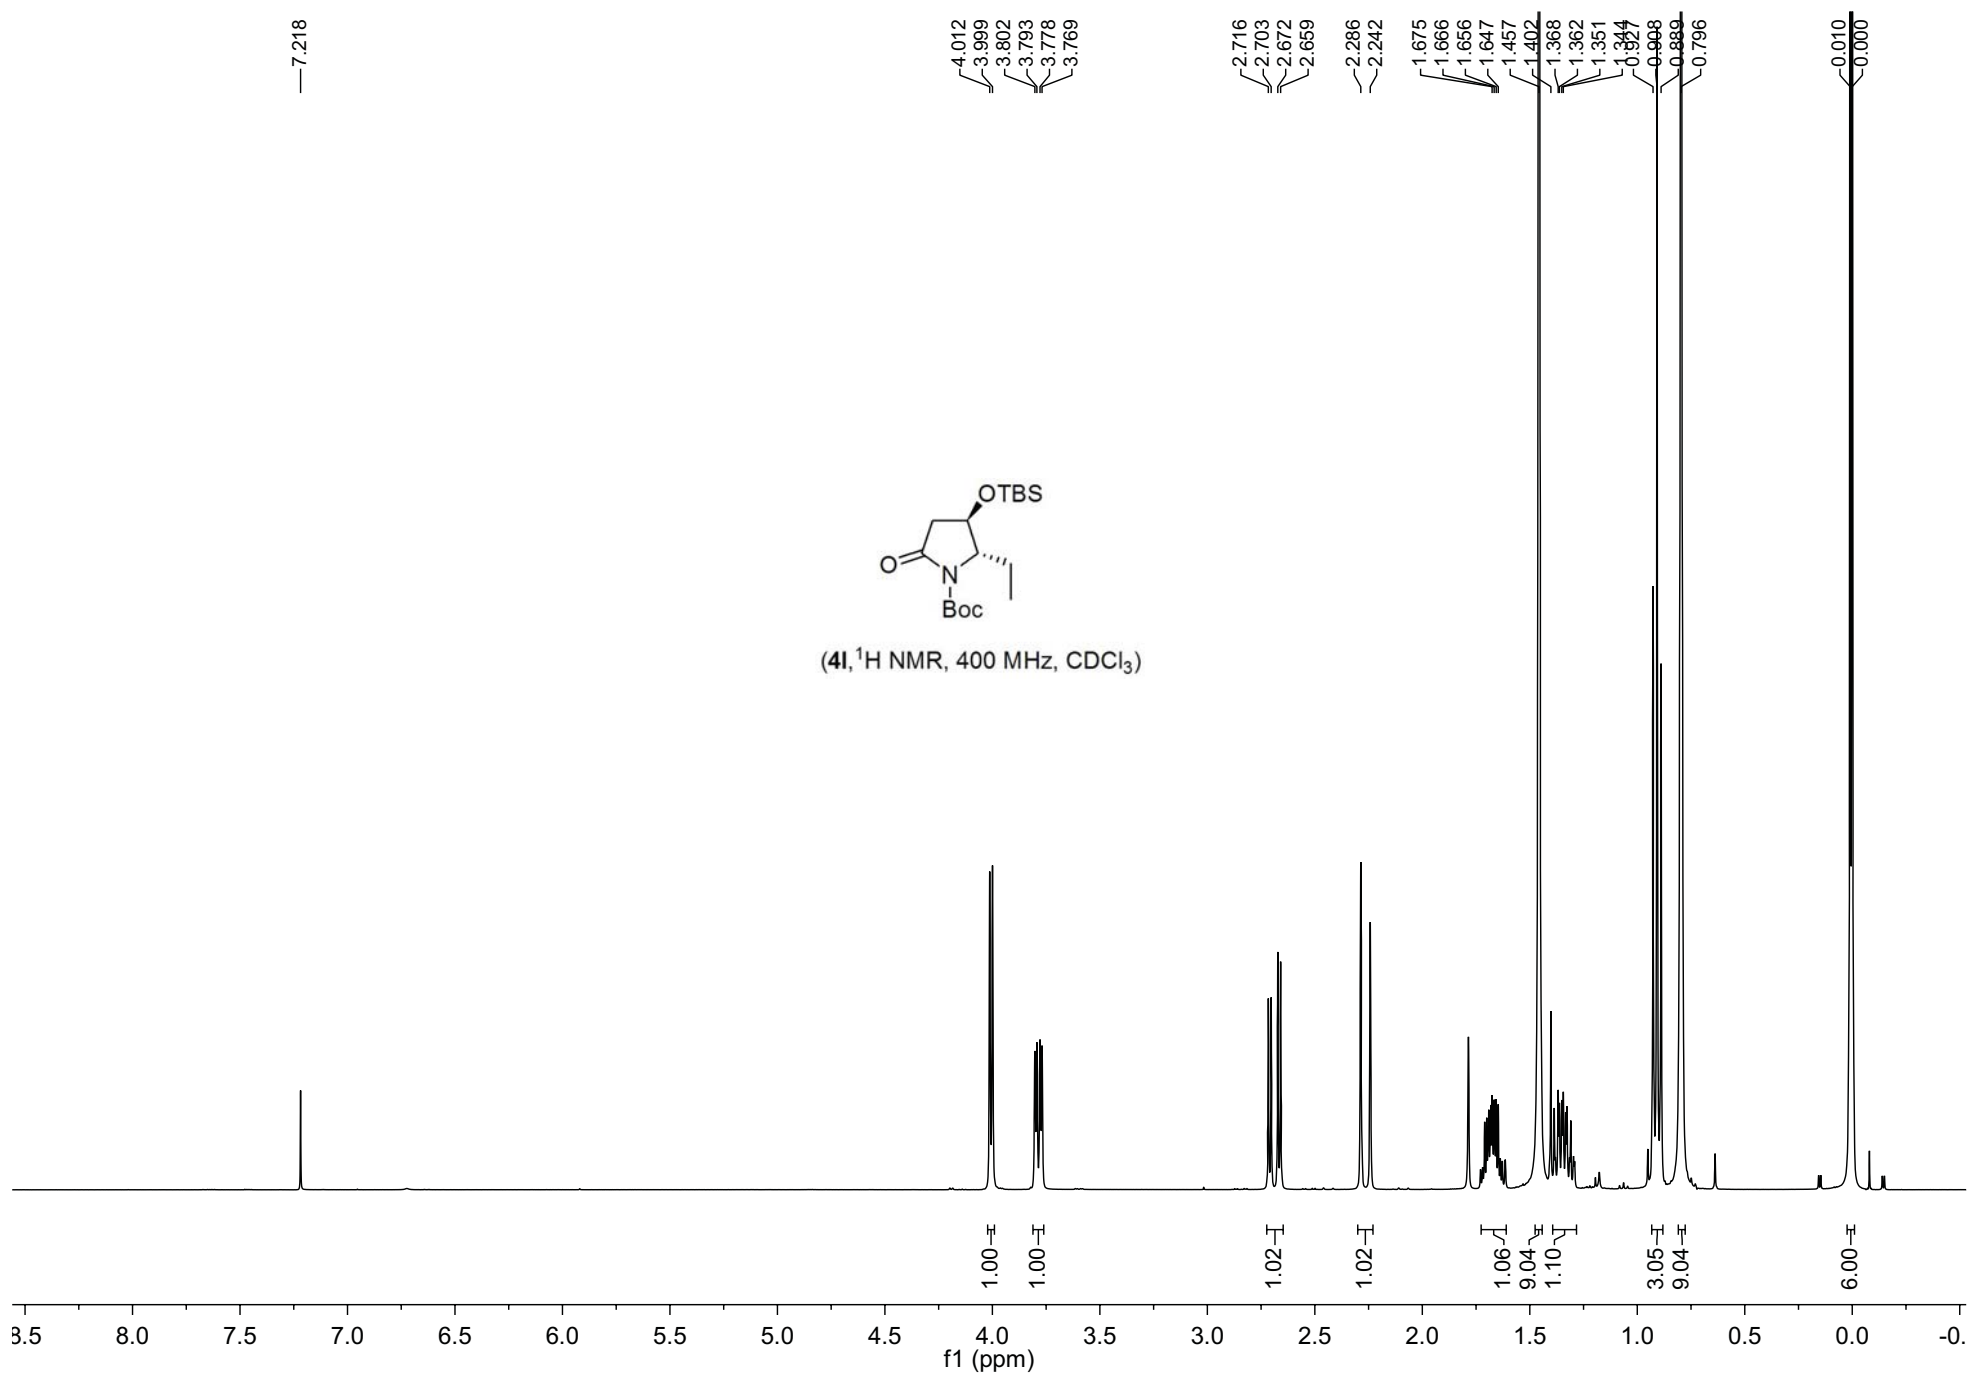

4.012  
3.999  
3.802  
3.793  
3.778  
3.769

2.716  
2.703  
2.672  
2.659

2.286  
2.242

1.675  
1.666  
1.656  
1.647

1.457  
1.402

1.368  
1.362

1.351  
1.344

0.927  
0.908

0.889  
0.796

0.010  
0.000

—172.685

—150.095

—82.732

—69.247

—67.900

—41.781

—28.023

—25.660

—24.943

—17.946

—10.331

—4.673

—4.711

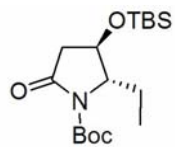

(41, <sup>13</sup>C NMR, 100 MHz, CDCl<sub>3</sub>)

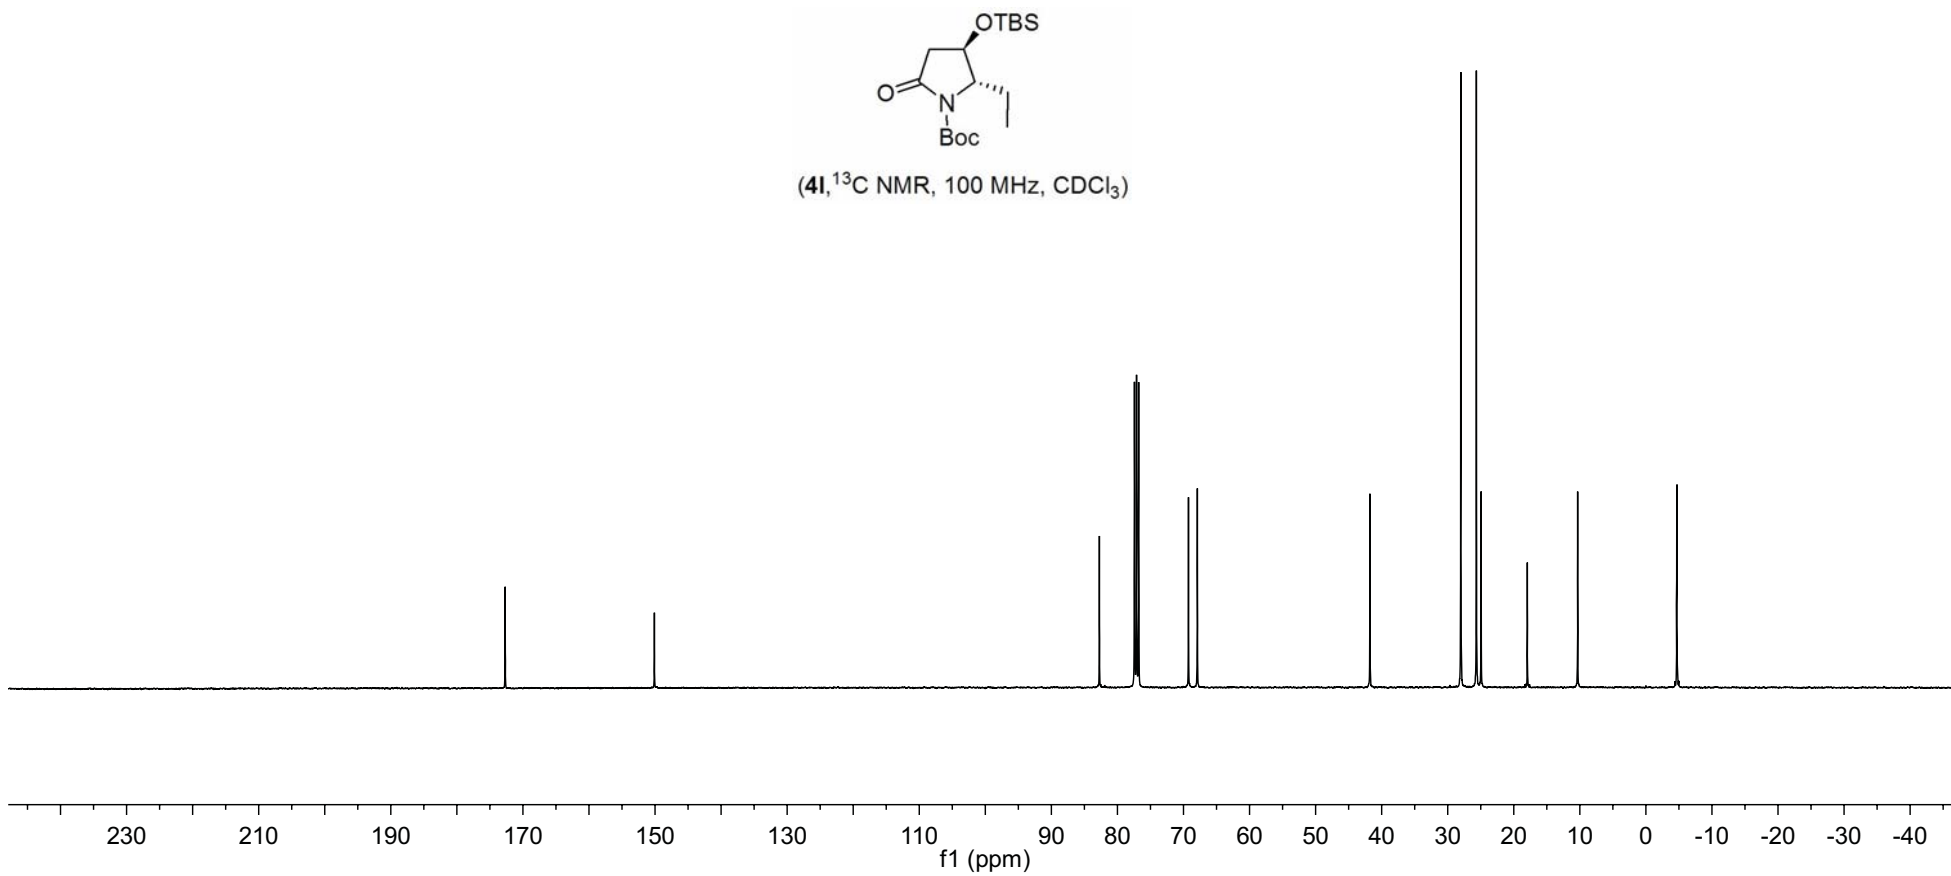

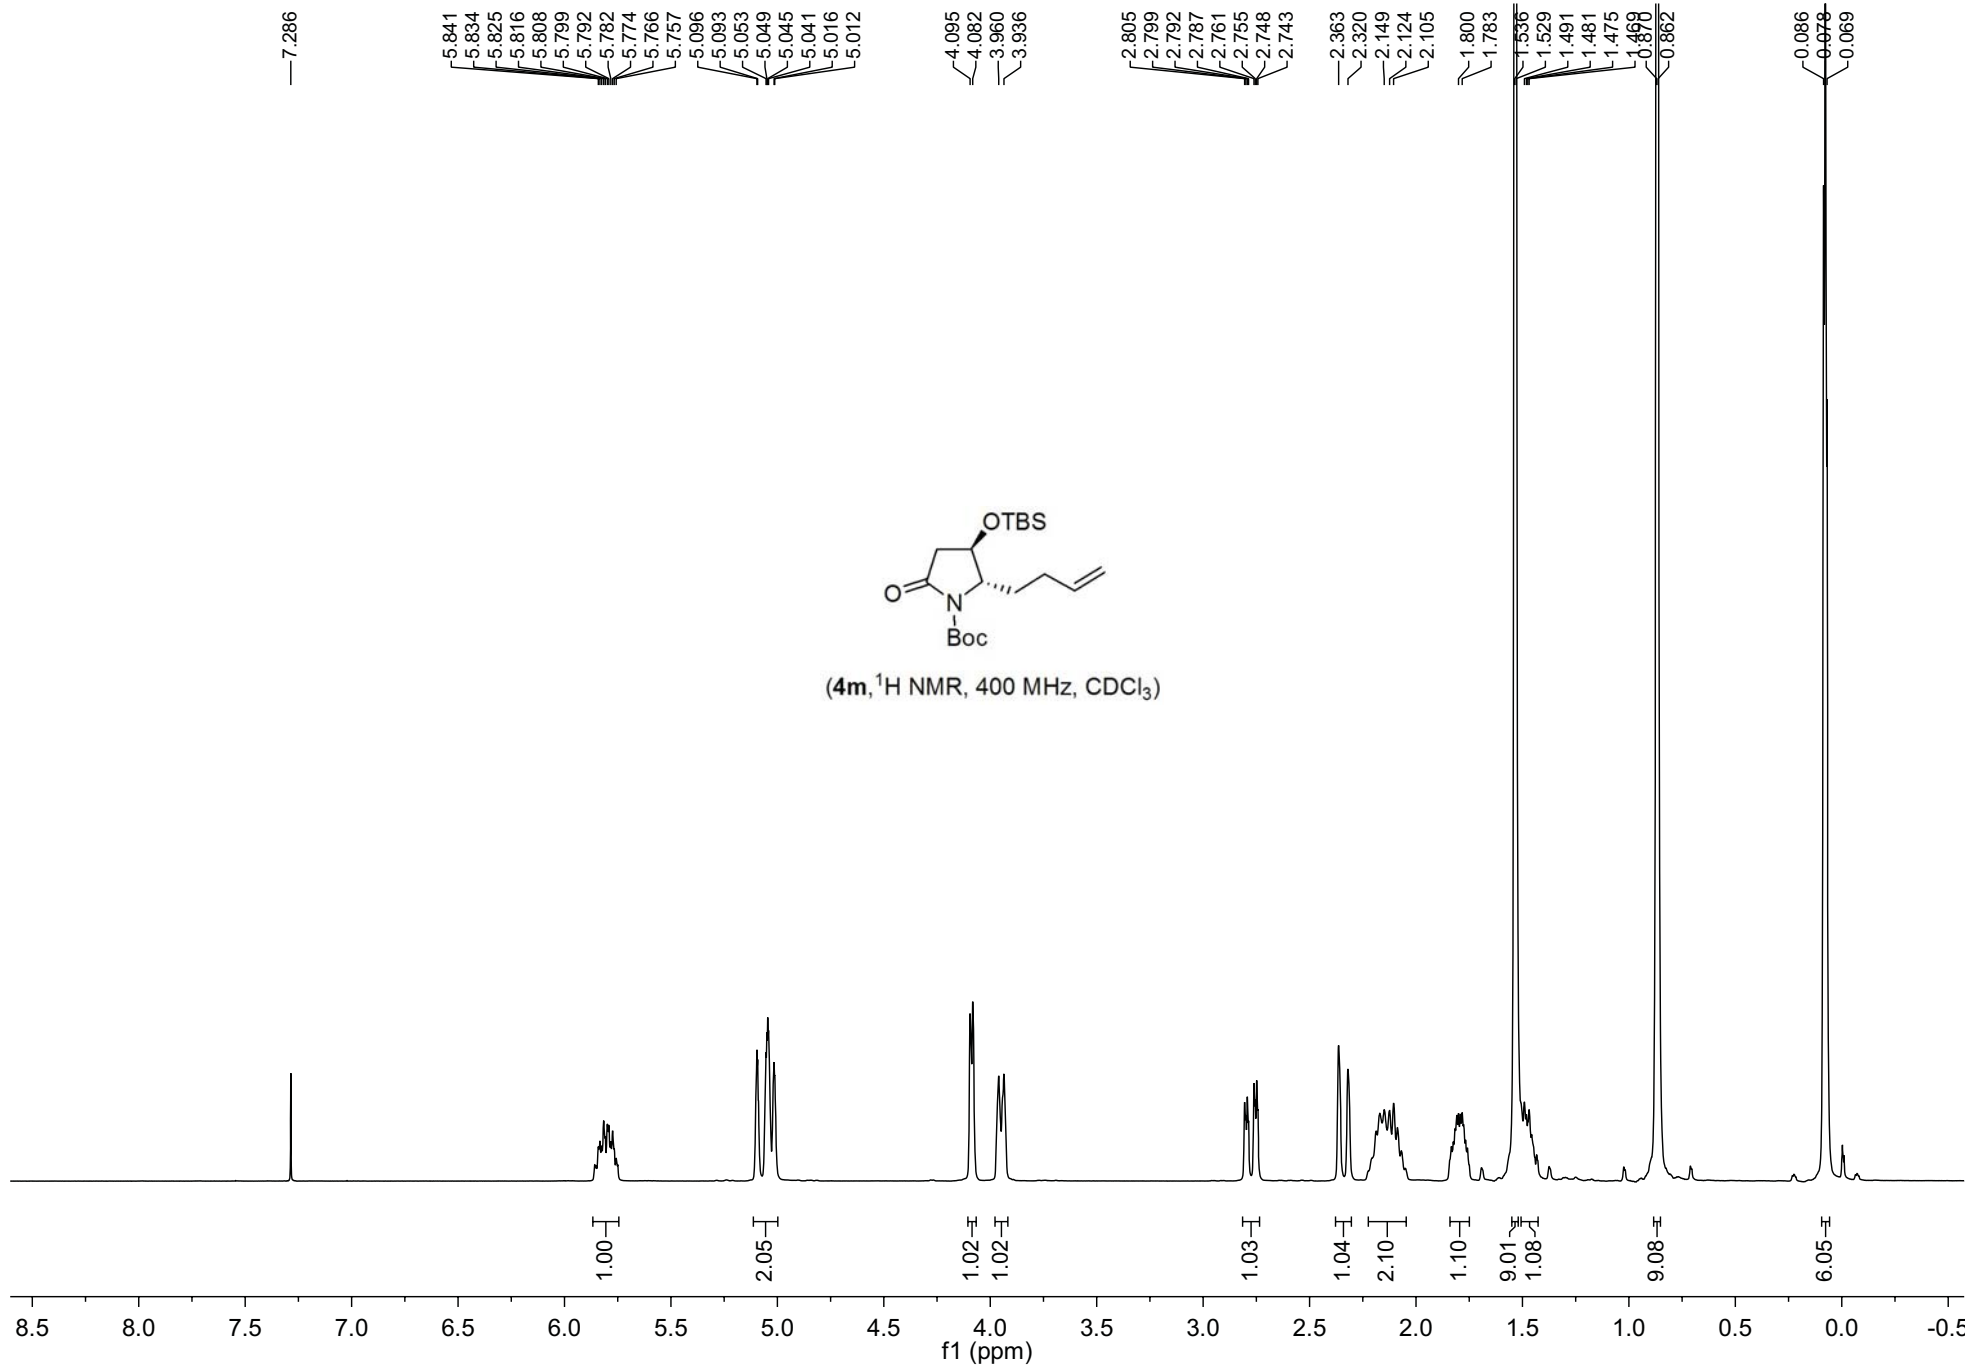

— 172.358  
— 149.820  
— 136.719  
— 115.556  
— 82.665  
68.000  
67.182  
— 41.450  
30.941  
29.891  
27.868  
25.460  
— 17.729  
— 4.820  
— 4.886

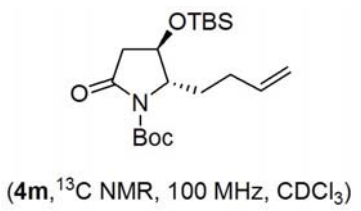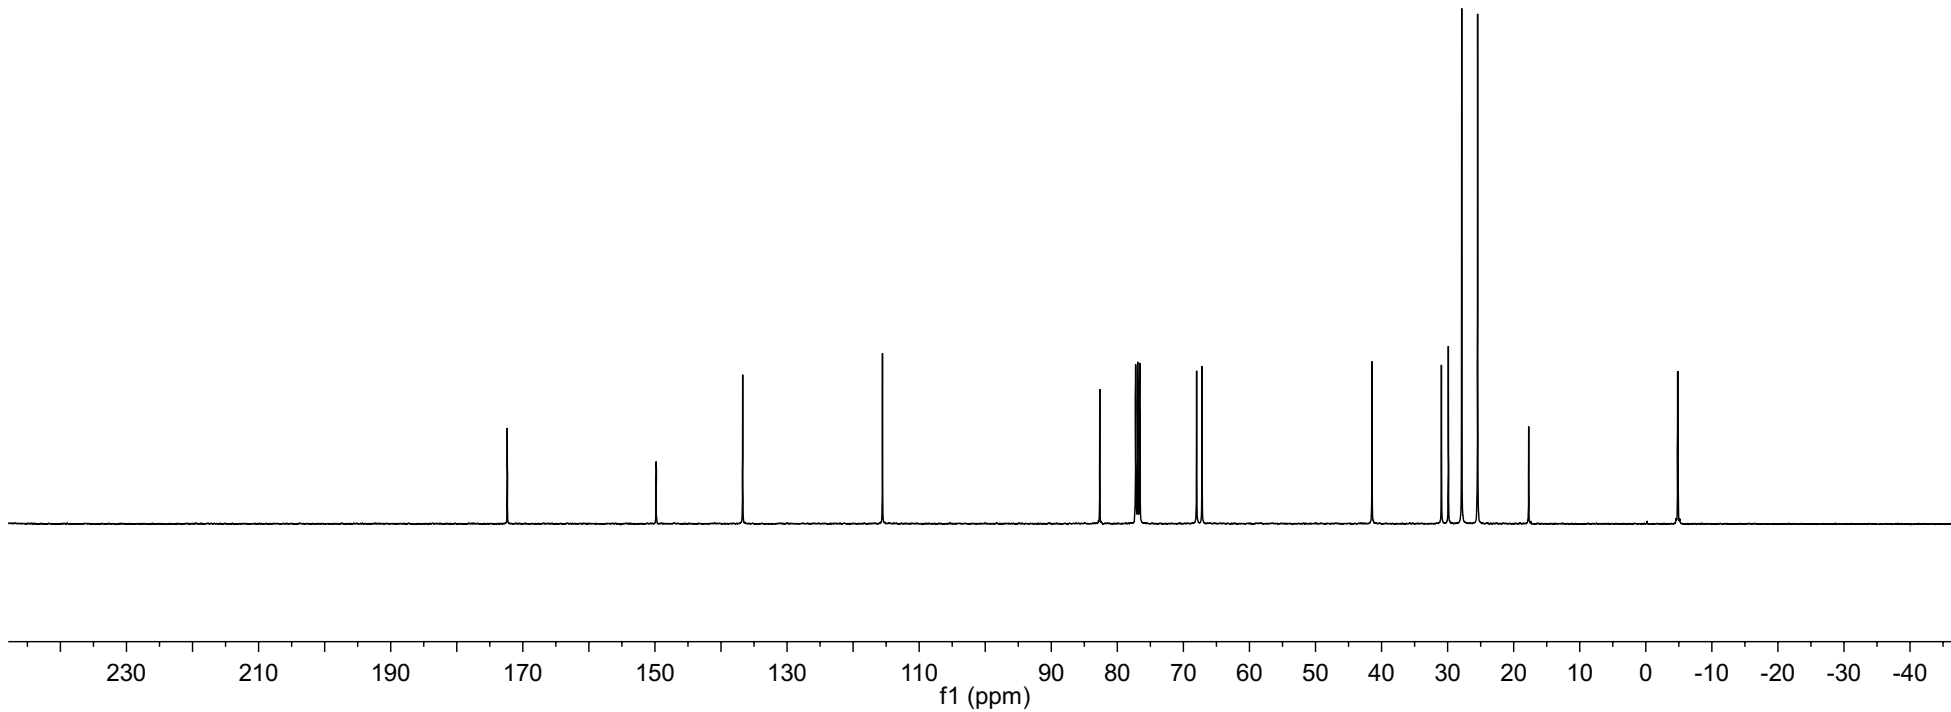

— 7.280

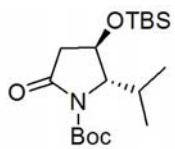

(4n, <sup>1</sup>H NMR, 400 MHz, CDCl<sub>3</sub>)

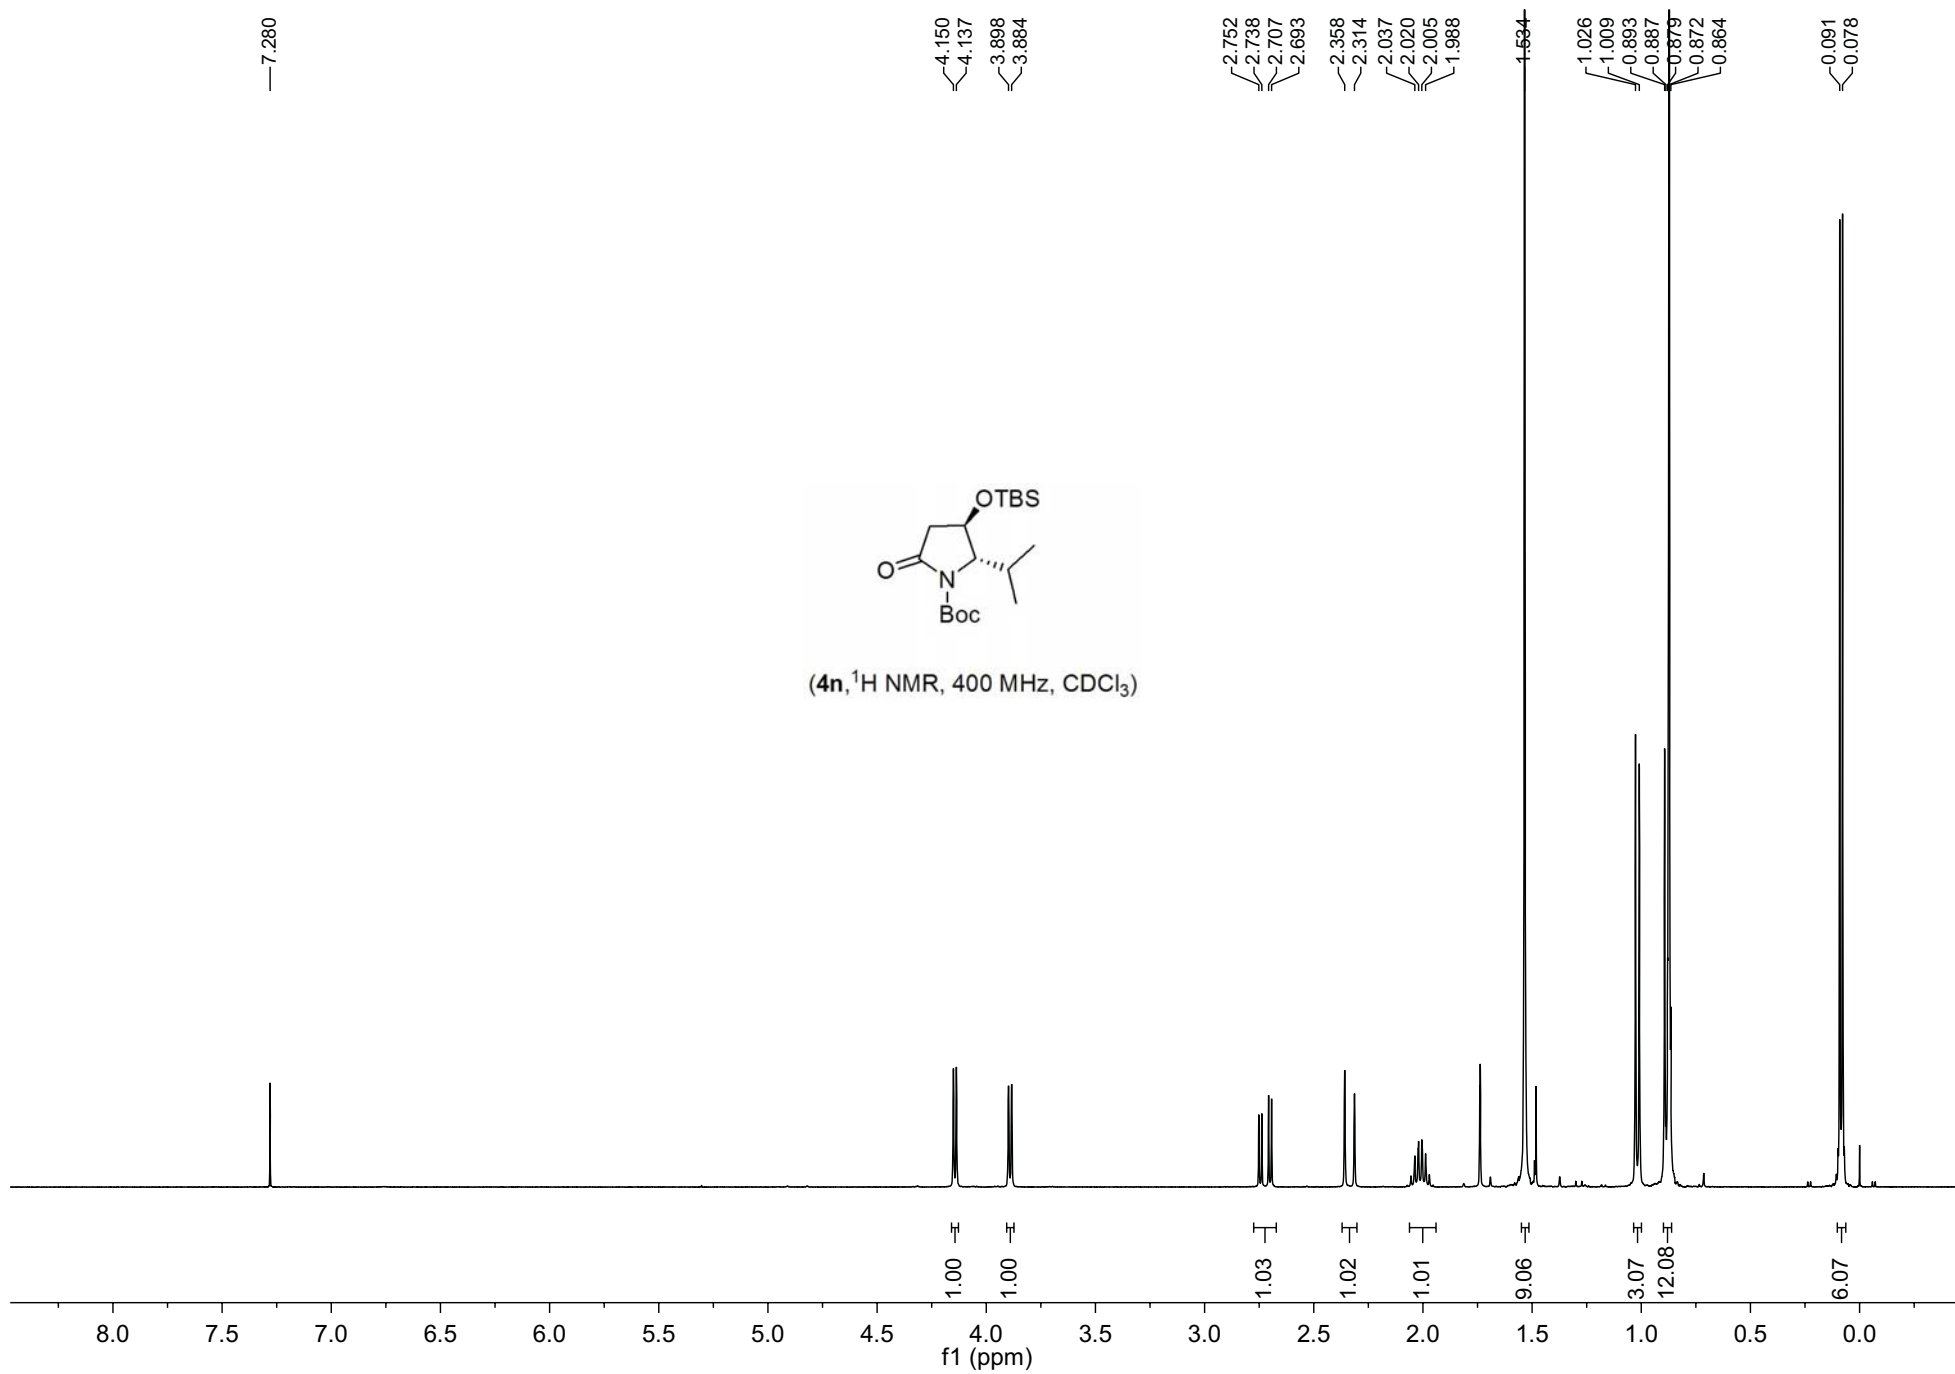

— 173.142

— 150.324

— 82.752

— 72.914

— 65.940

— 42.955

29.815

29.682

27.995

25.627

19.316

17.860

17.582

4.580

4.668

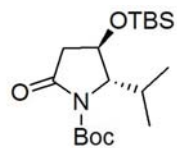

(4n, <sup>13</sup>C NMR, 100 MHz, CDCl<sub>3</sub>)

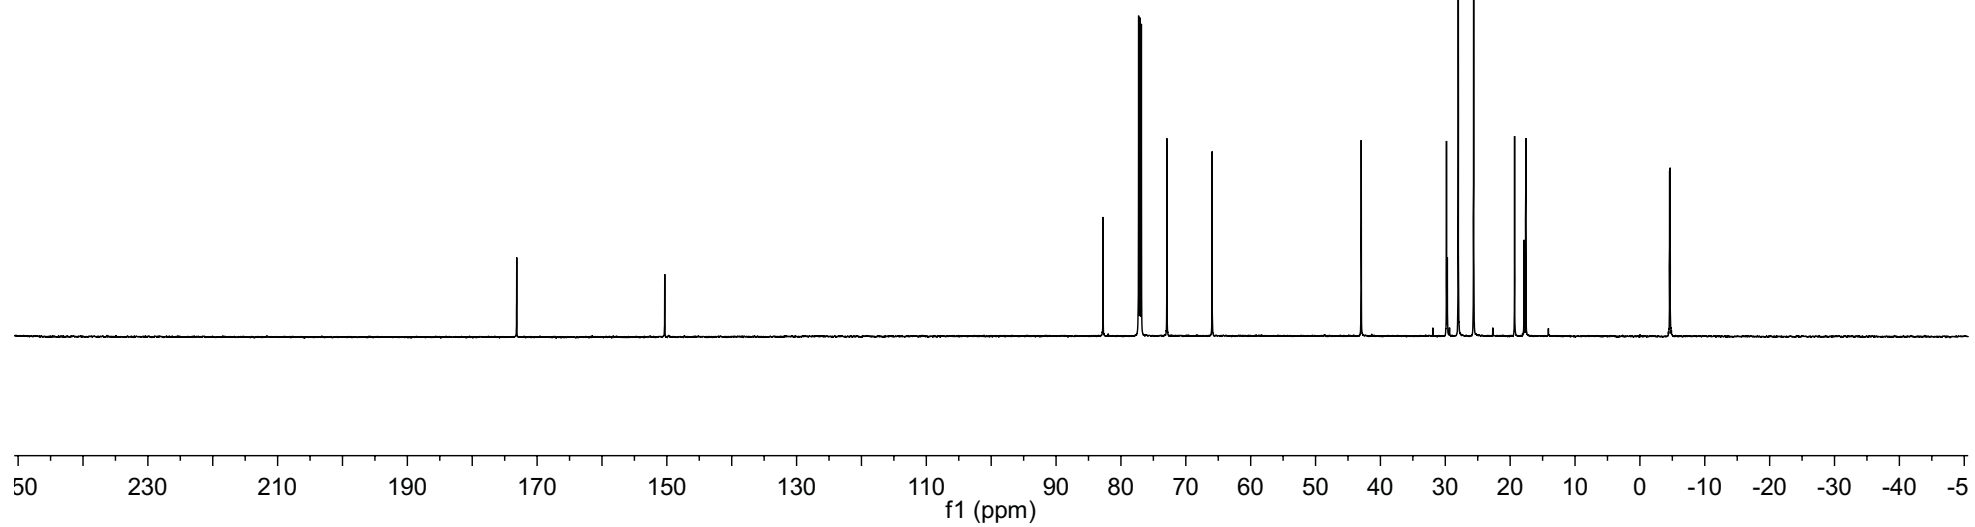

— 7.286

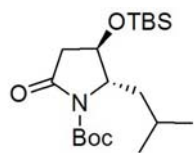

(4o, <sup>1</sup>H NMR, 400 MHz, CDCl<sub>3</sub>)

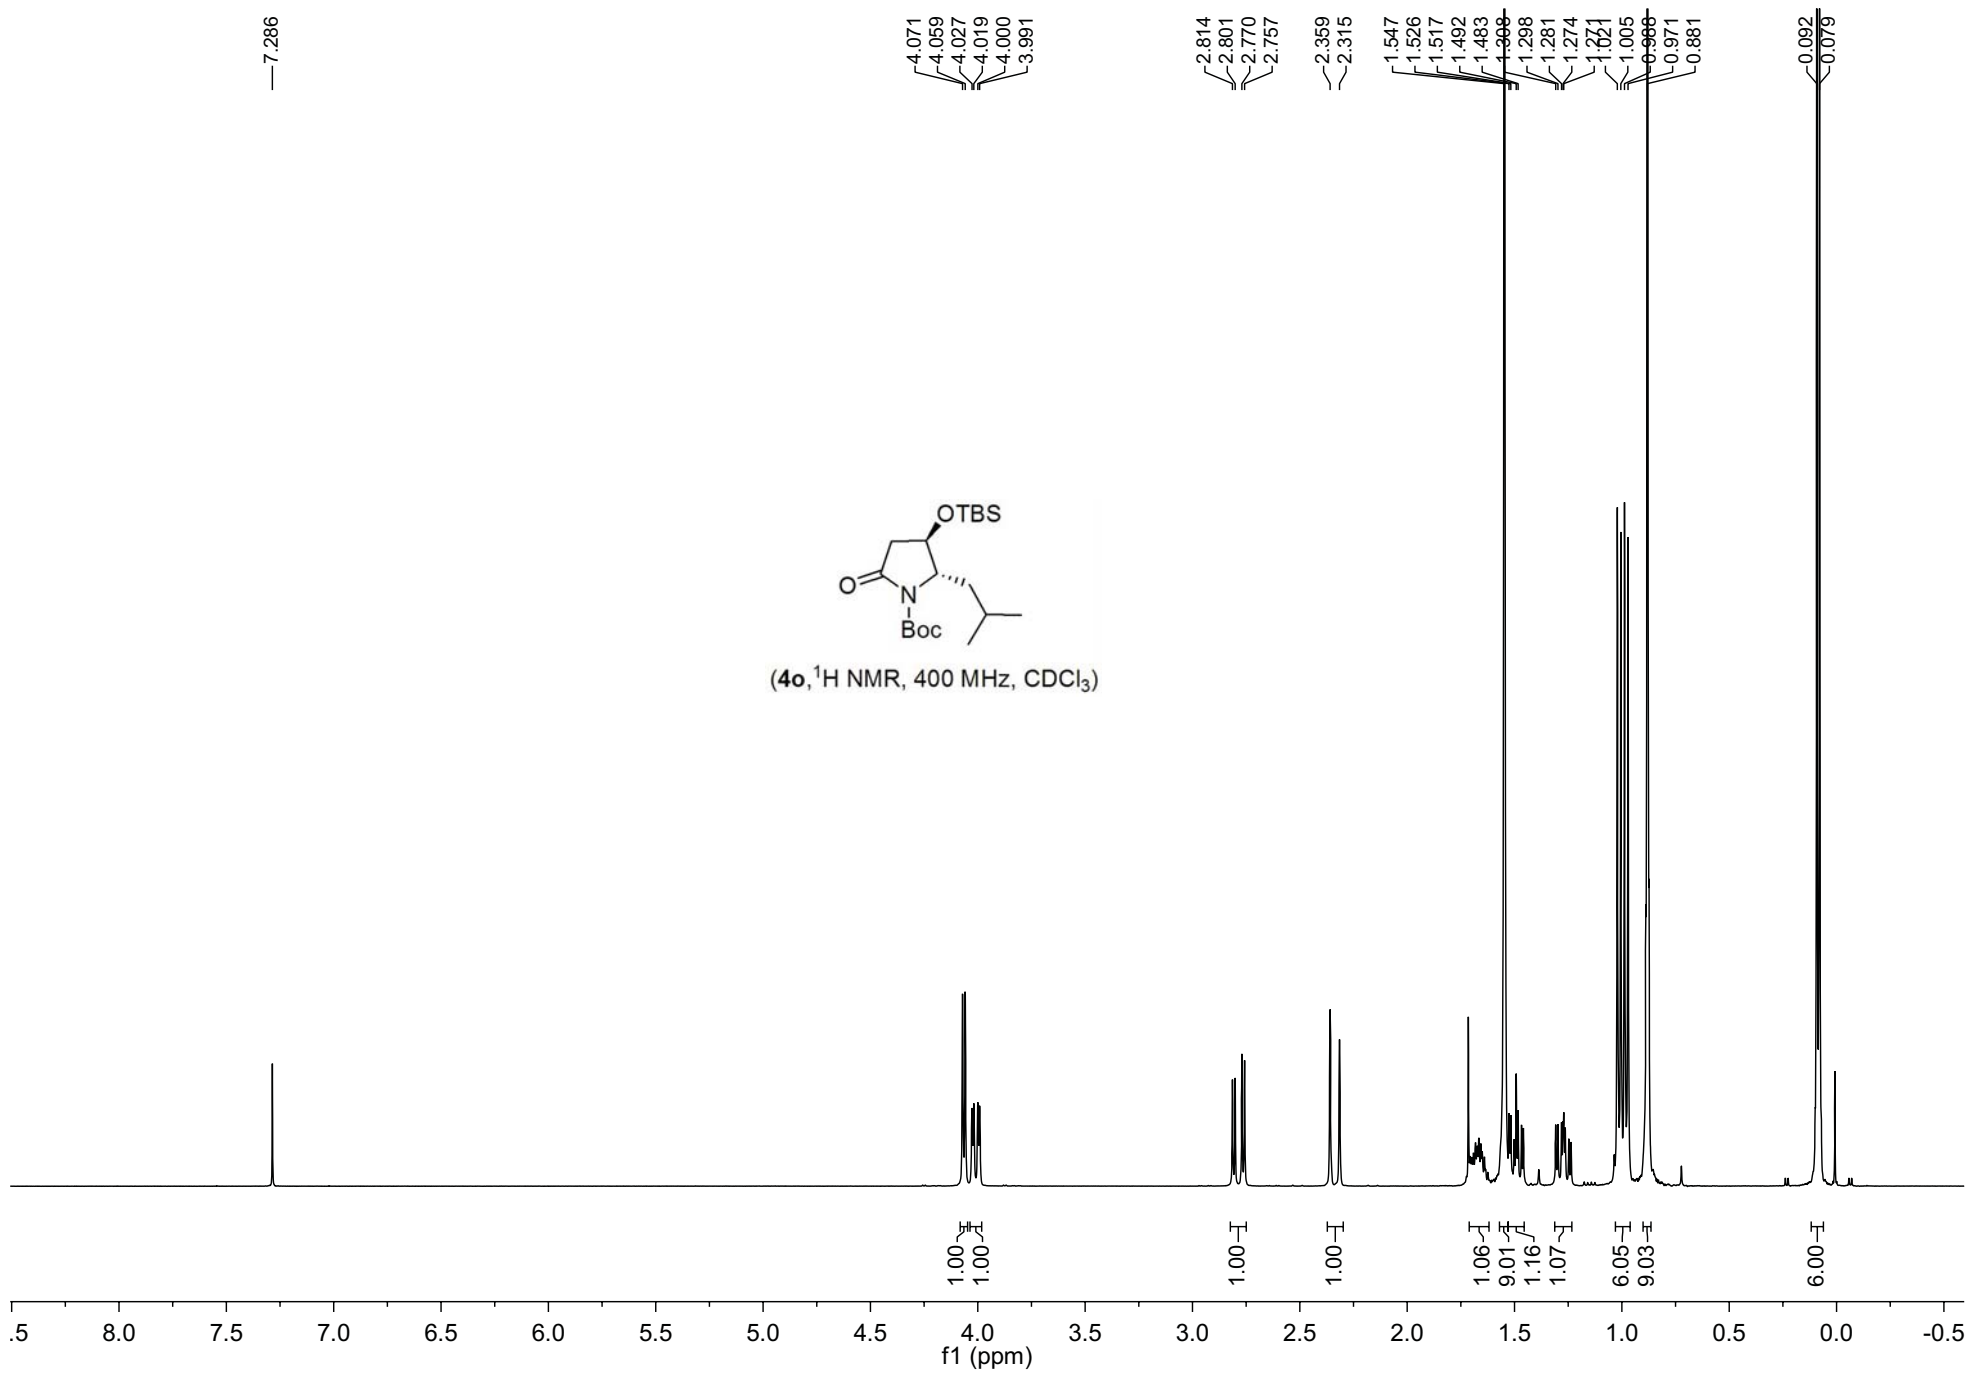

—172.810

—149.905

—82.768

—68.502

—66.389

—41.458  
—41.118

—28.090

—25.632

—25.286

—23.786

—21.659

—17.904

—4.653  
—4.770

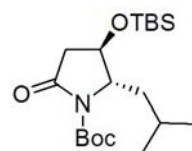

(**4o**,  $^{13}\text{C}$  NMR, 100 MHz,  $\text{CDCl}_3$ )

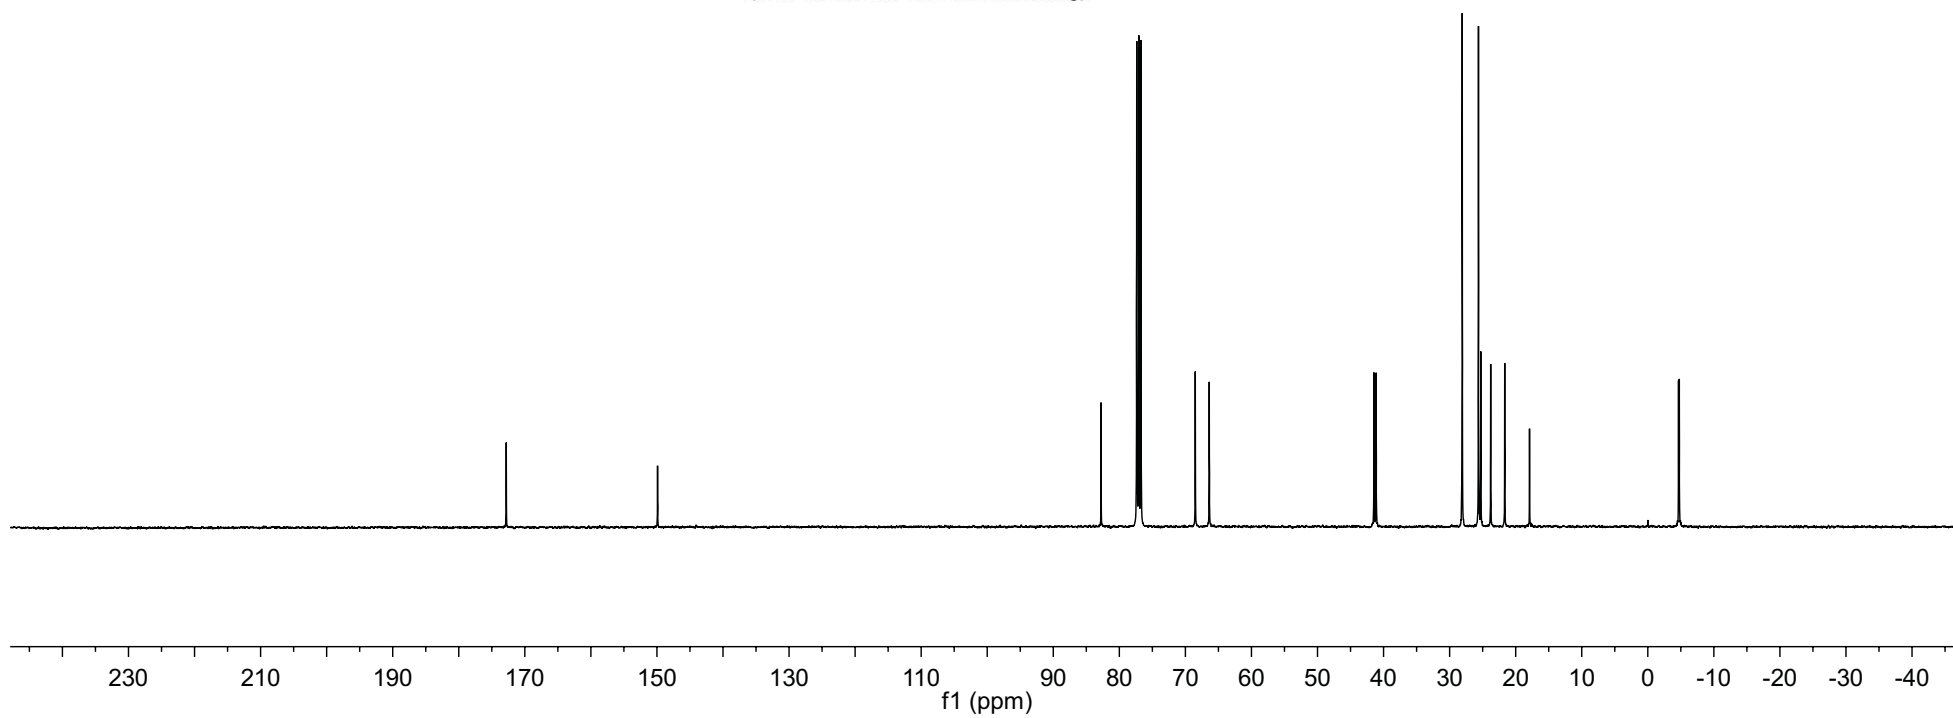



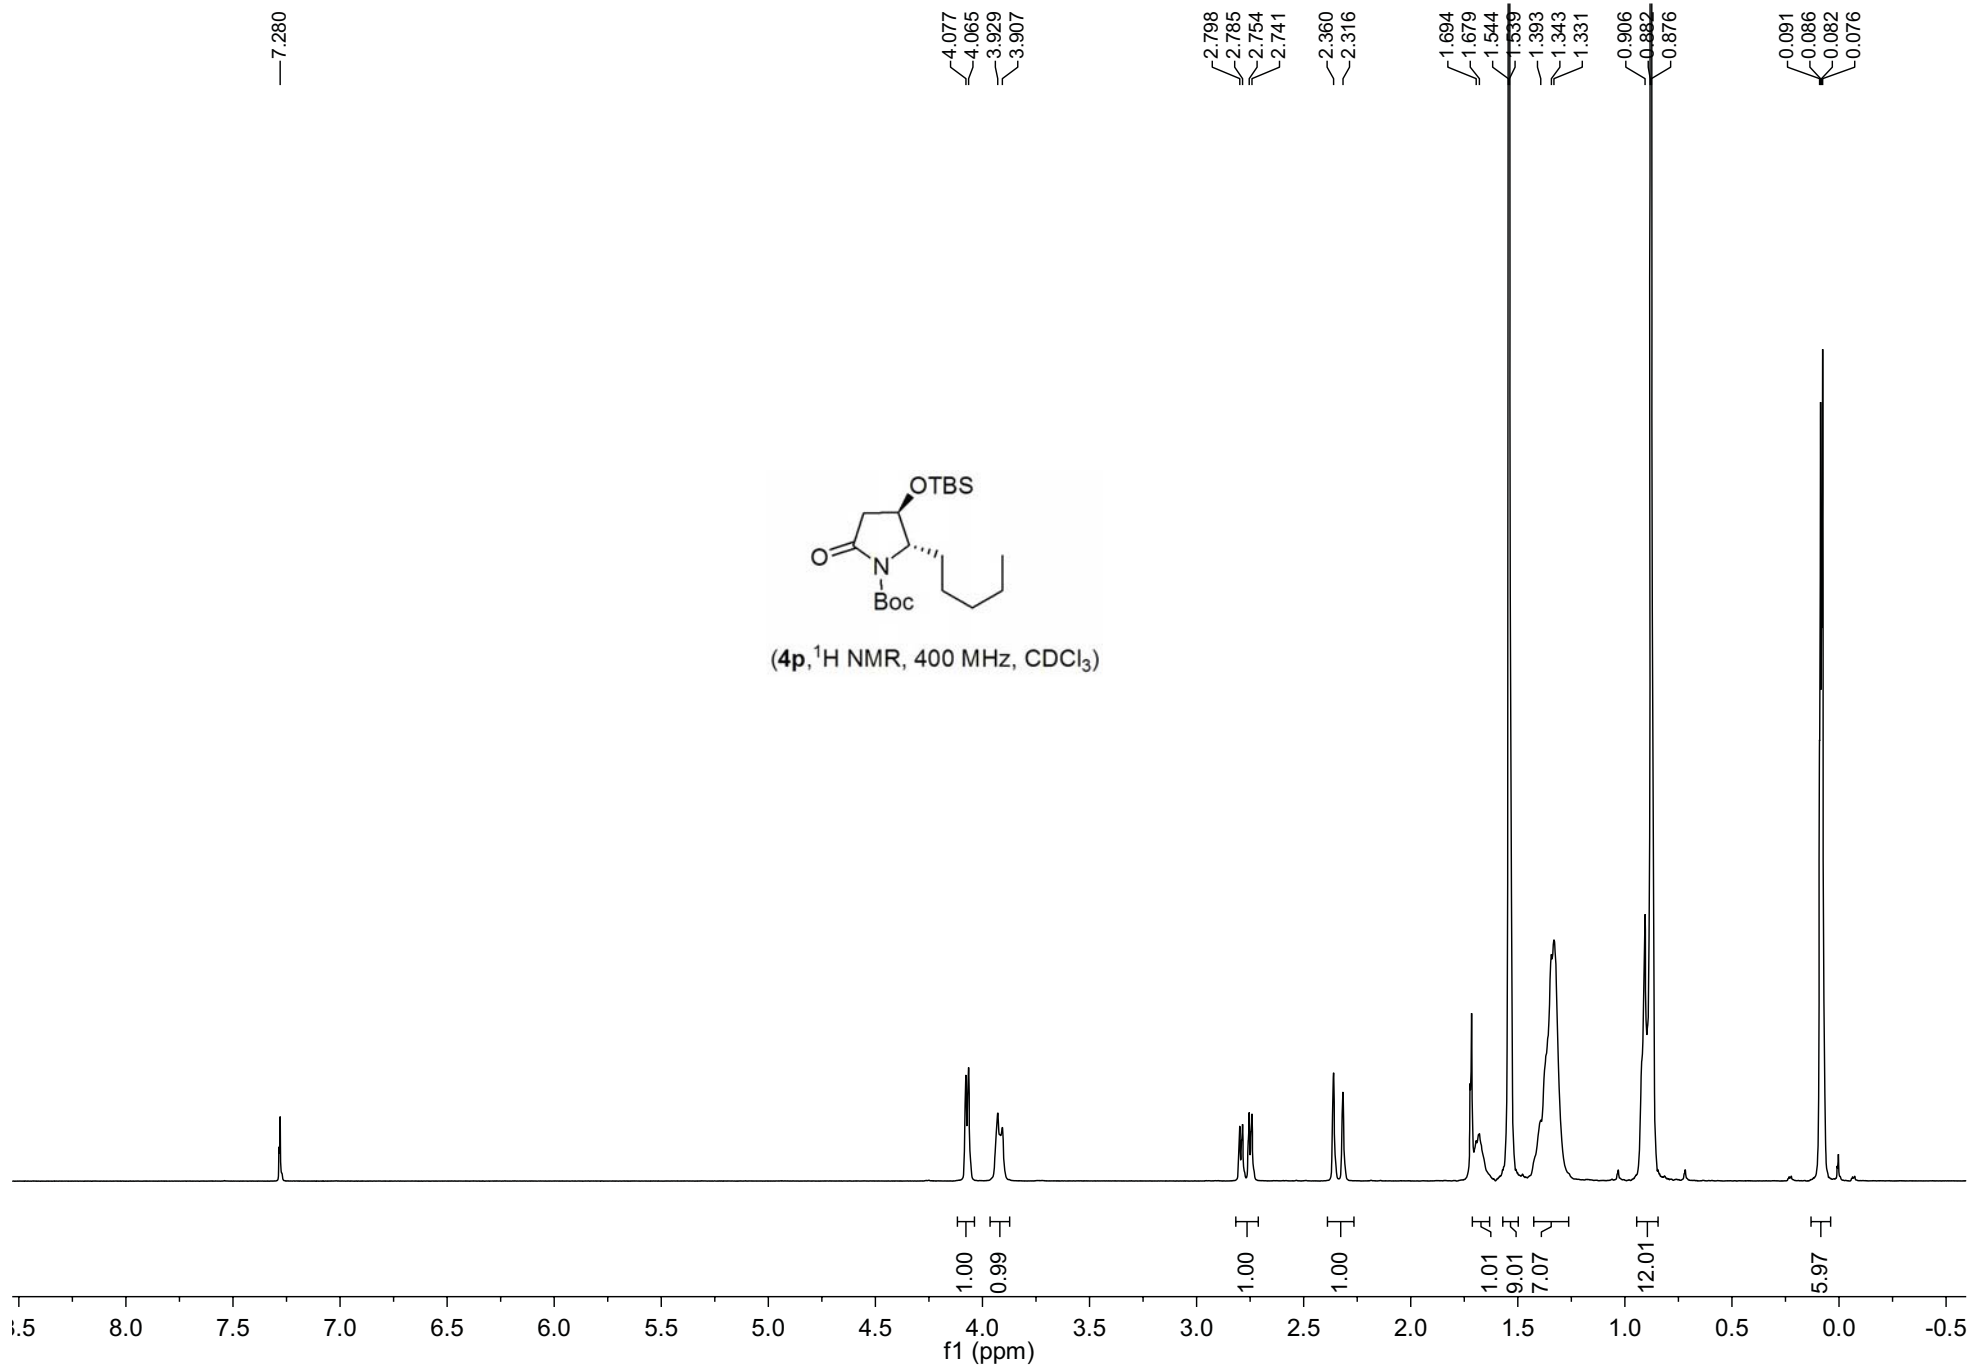

— 172.704  
— 150.052  
— 82.722  
68.331  
67.953  
— 41.697  
31.962  
31.608  
28.044  
25.653  
25.616  
22.508  
17.936  
13.916  
— 4.670  
— 4.724

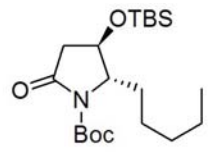

(4p, <sup>13</sup>C NMR, 100 MHz, CDCl<sub>3</sub>)

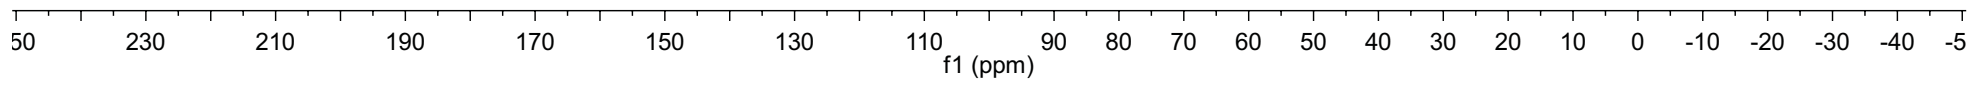

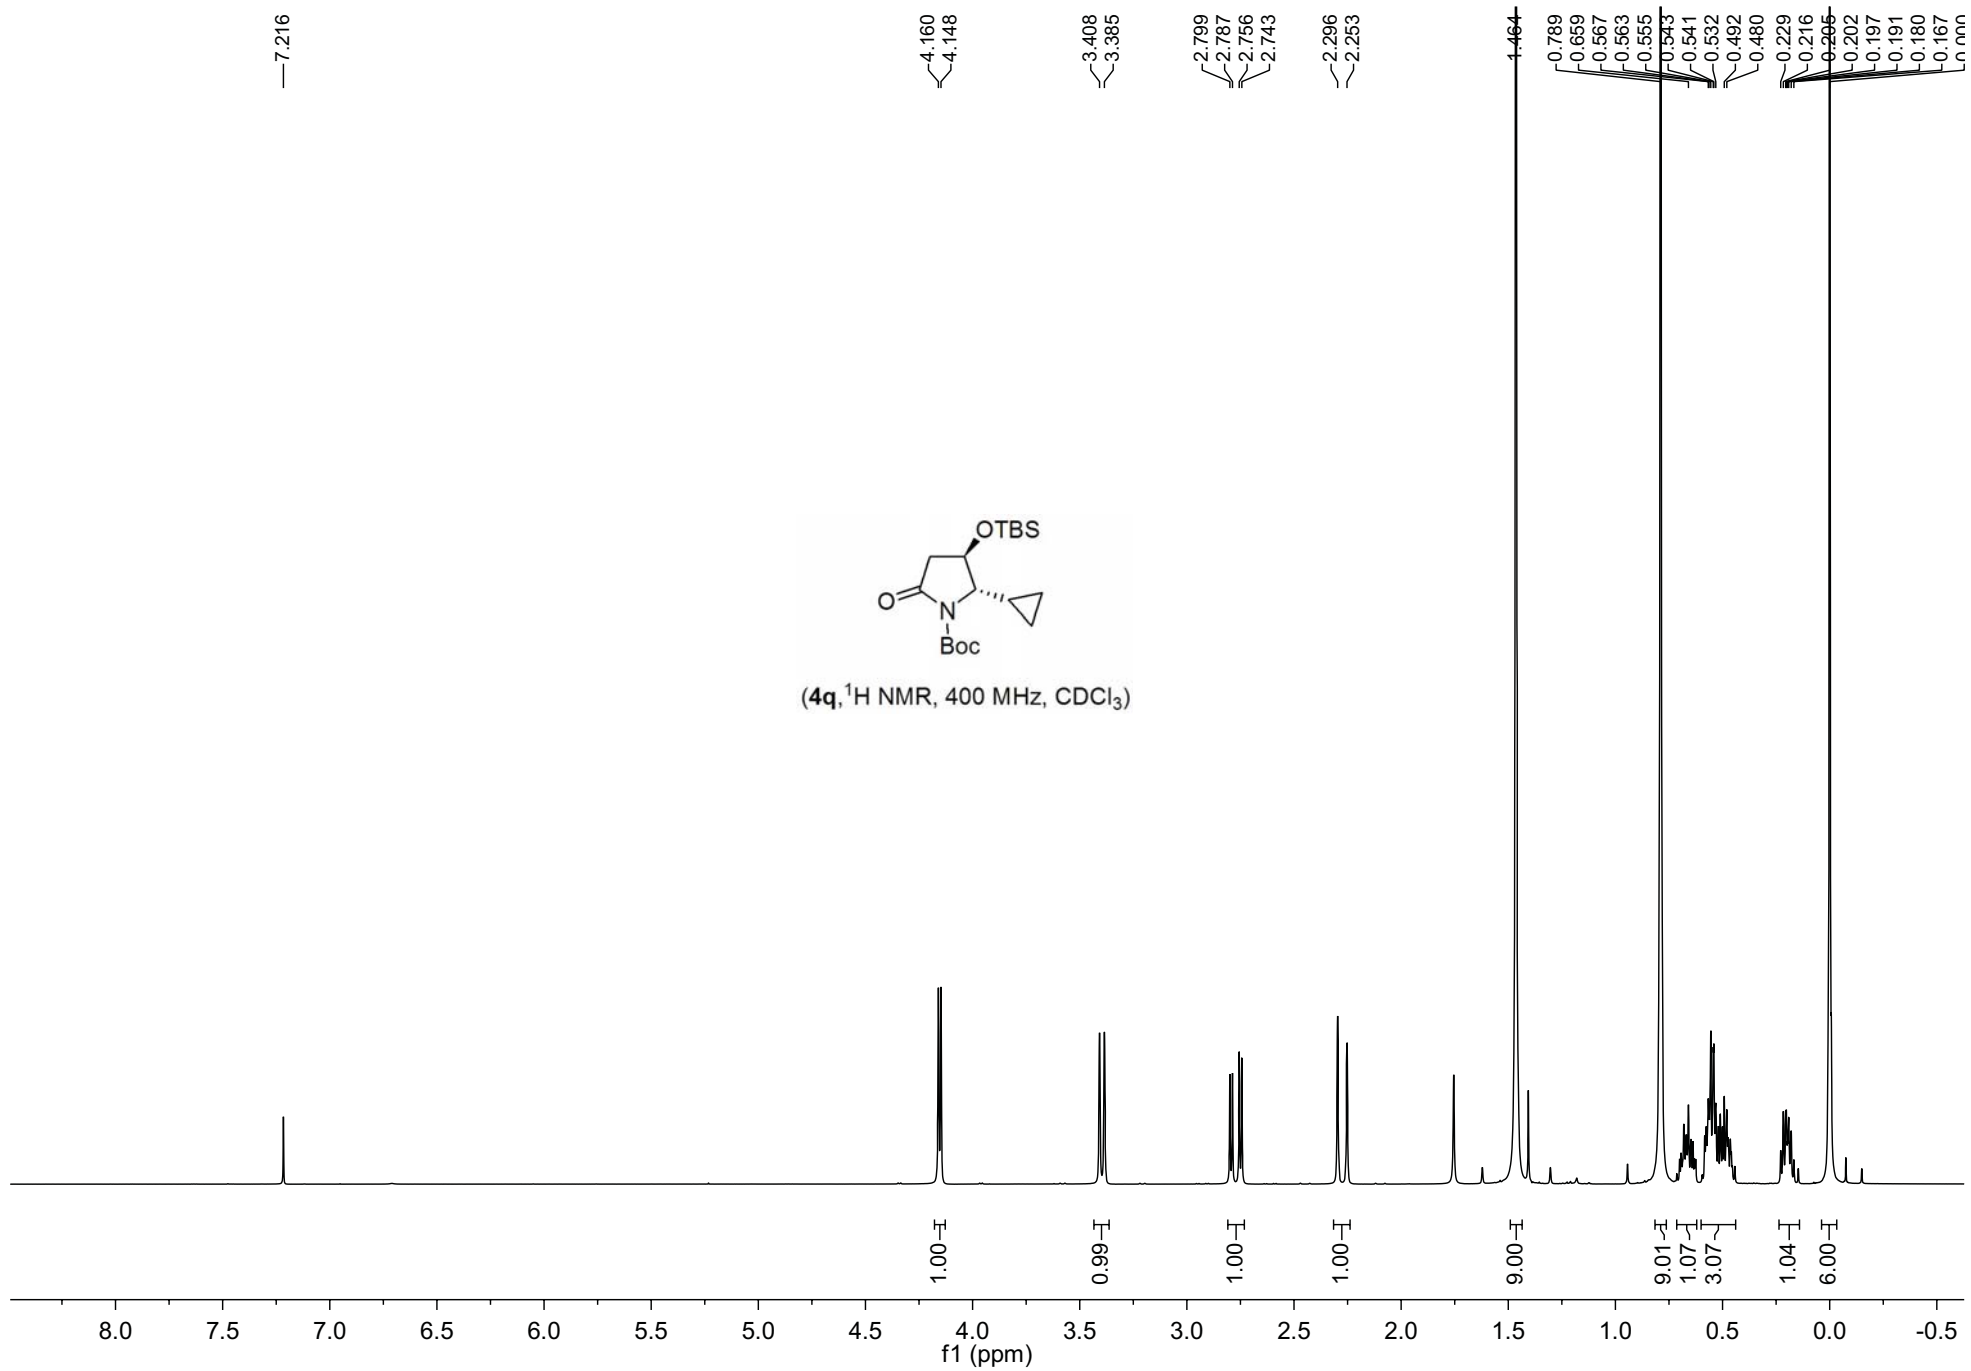

—172.849

—150.298

—82.661

—71.368  
—70.311

—41.798

—27.945  
—25.558

—17.868  
—13.613

—4.495  
—1.803  
—4.794  
—4.842

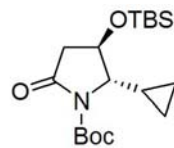

(4q,  $^{13}\text{C}$  NMR, 100 MHz,  $\text{CDCl}_3$ )

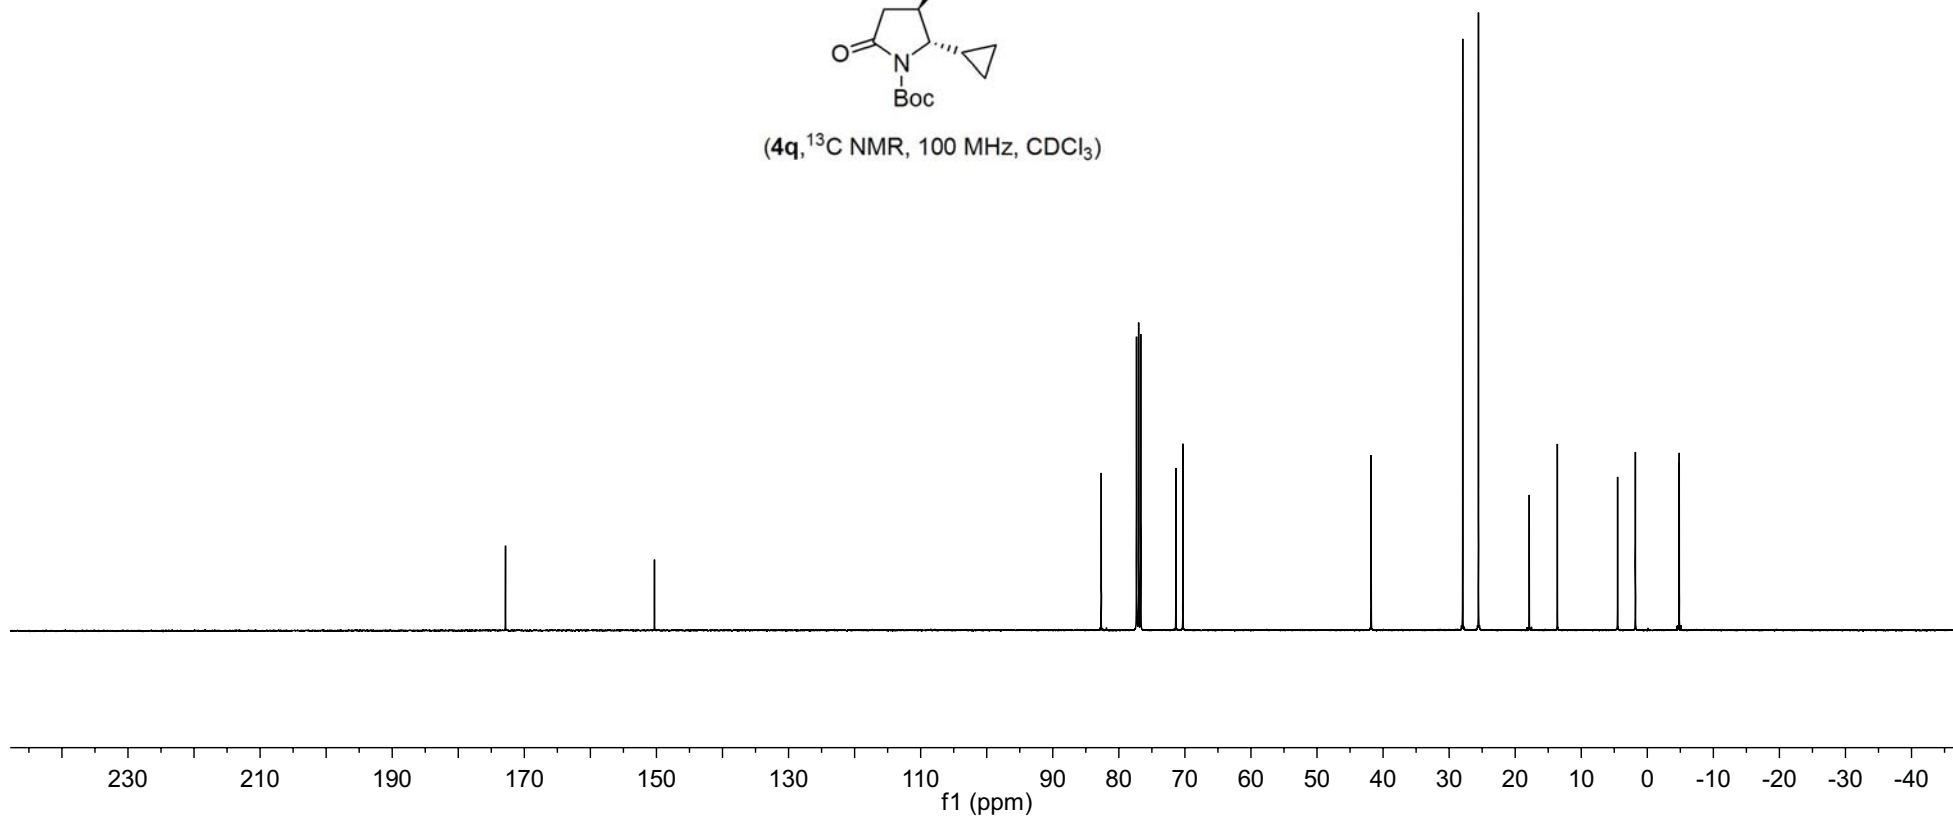

— 7.240

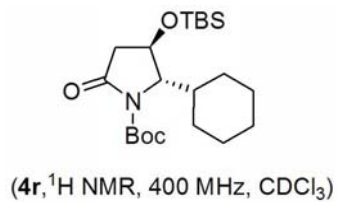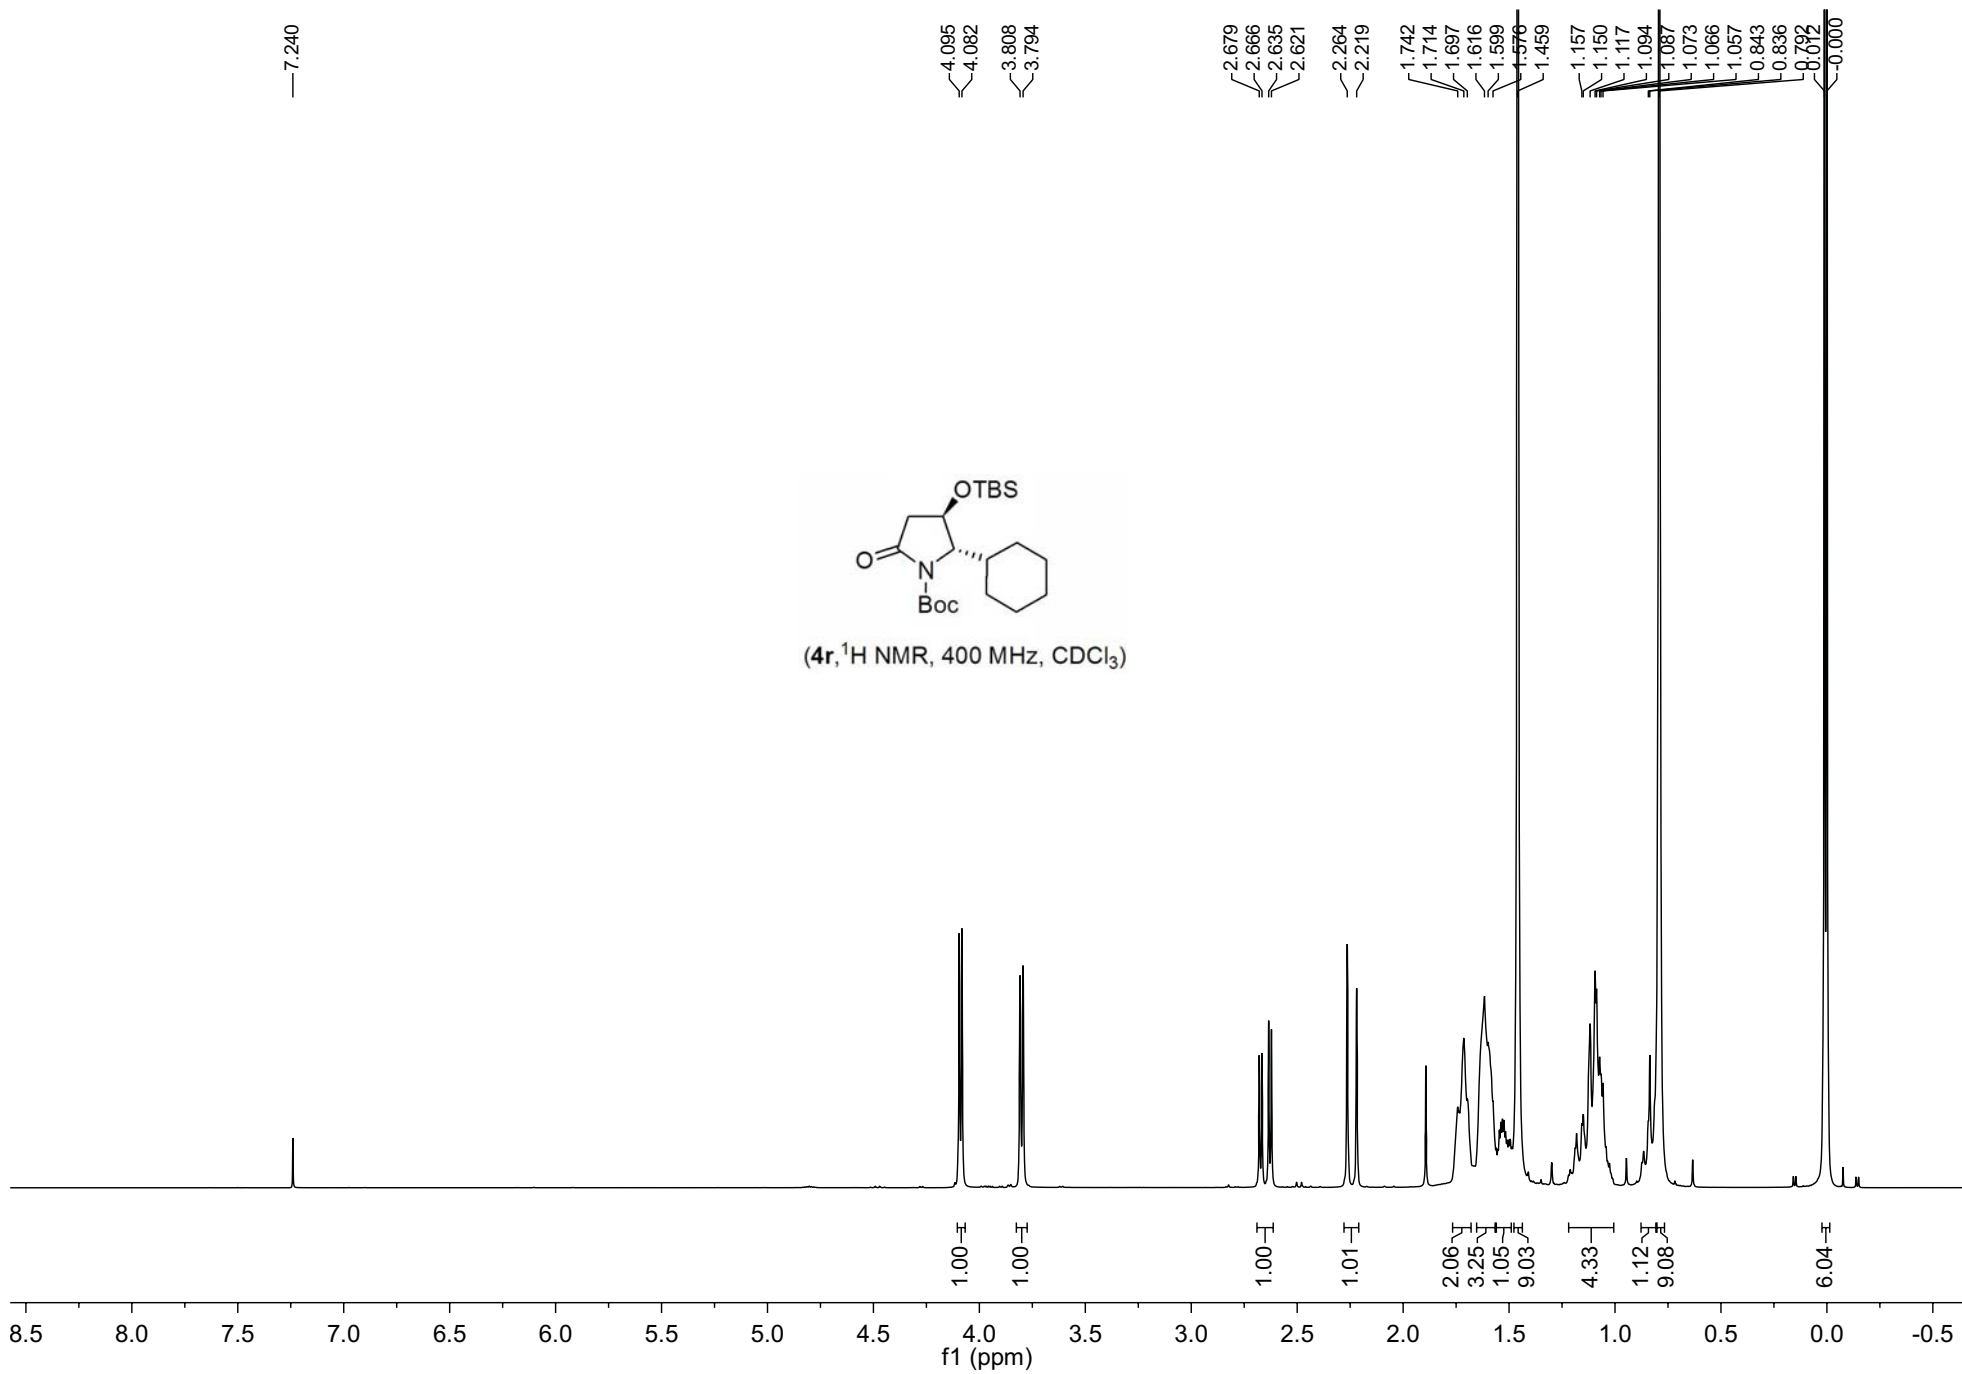

—173.181

—150.382

—82.664

—72.526

—66.590

—42.885  
—40.237

—29.844  
—28.012  
—26.270  
—26.186  
—25.843

—4.582  
—4.597

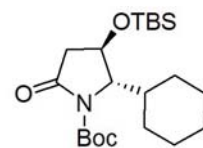

(4r, <sup>13</sup>C NMR, 100 MHz, CDCl<sub>3</sub>)

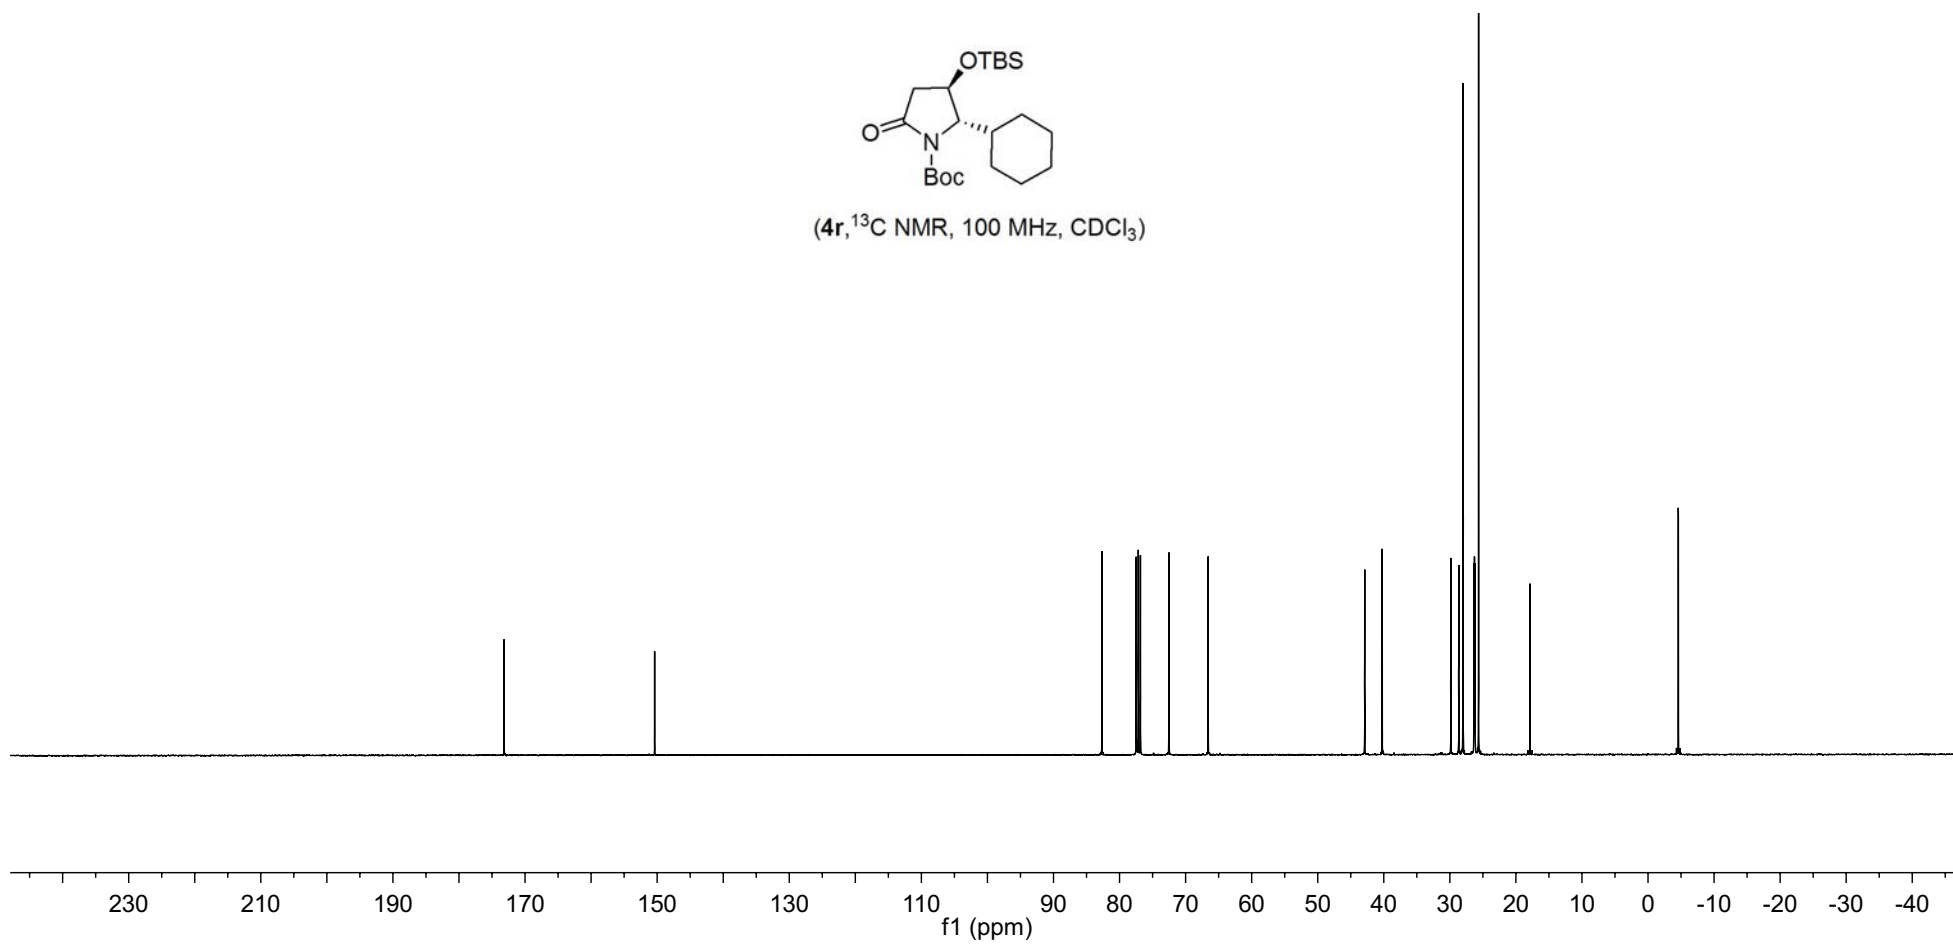

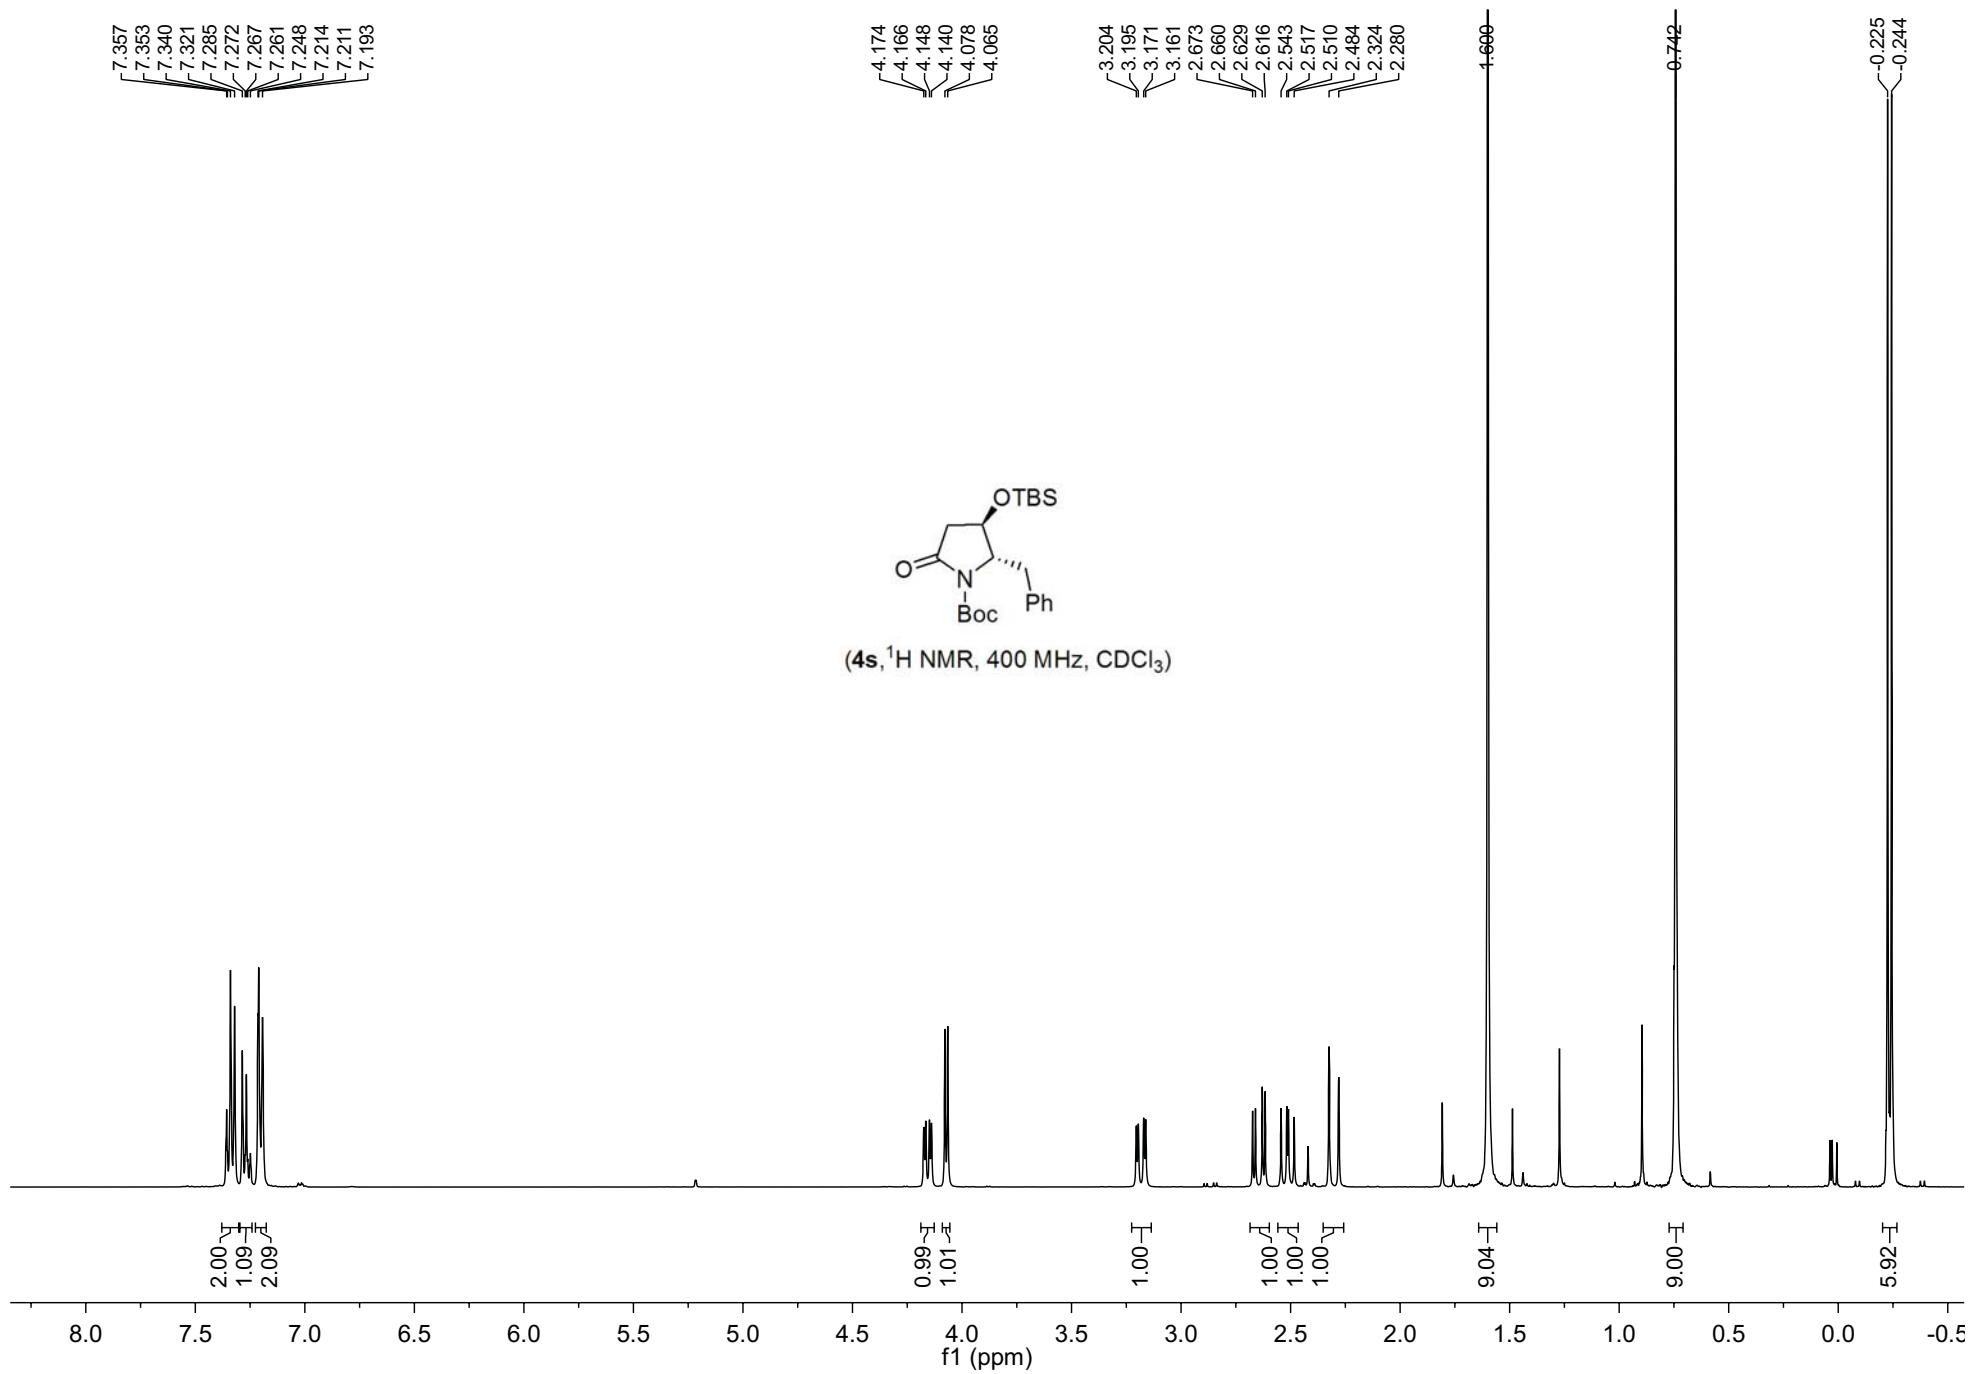

— 172.793  
— 149.963  
— 136.628  
— 129.281  
— 128.888  
— 127.107  
— 83.035  
— 69.143  
— 66.869  
— 41.351  
— 37.979  
— 28.119  
— 25.538  
— 17.818  
— 5.231  
— 5.296

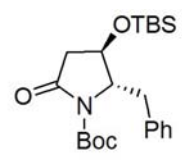

(4s, <sup>13</sup>C NMR, 100 MHz, CDCl<sub>3</sub>)

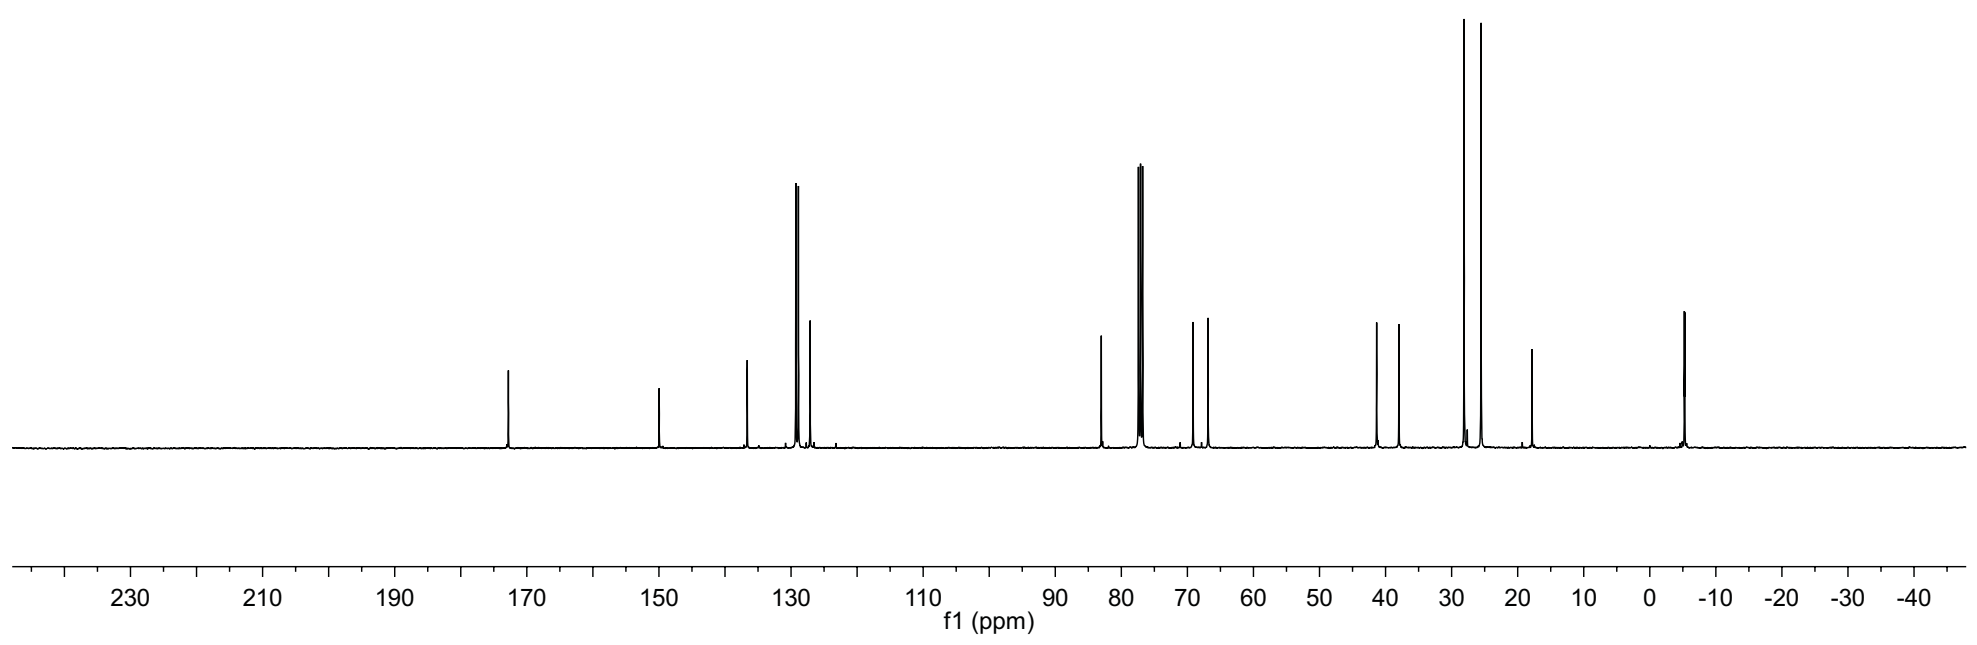



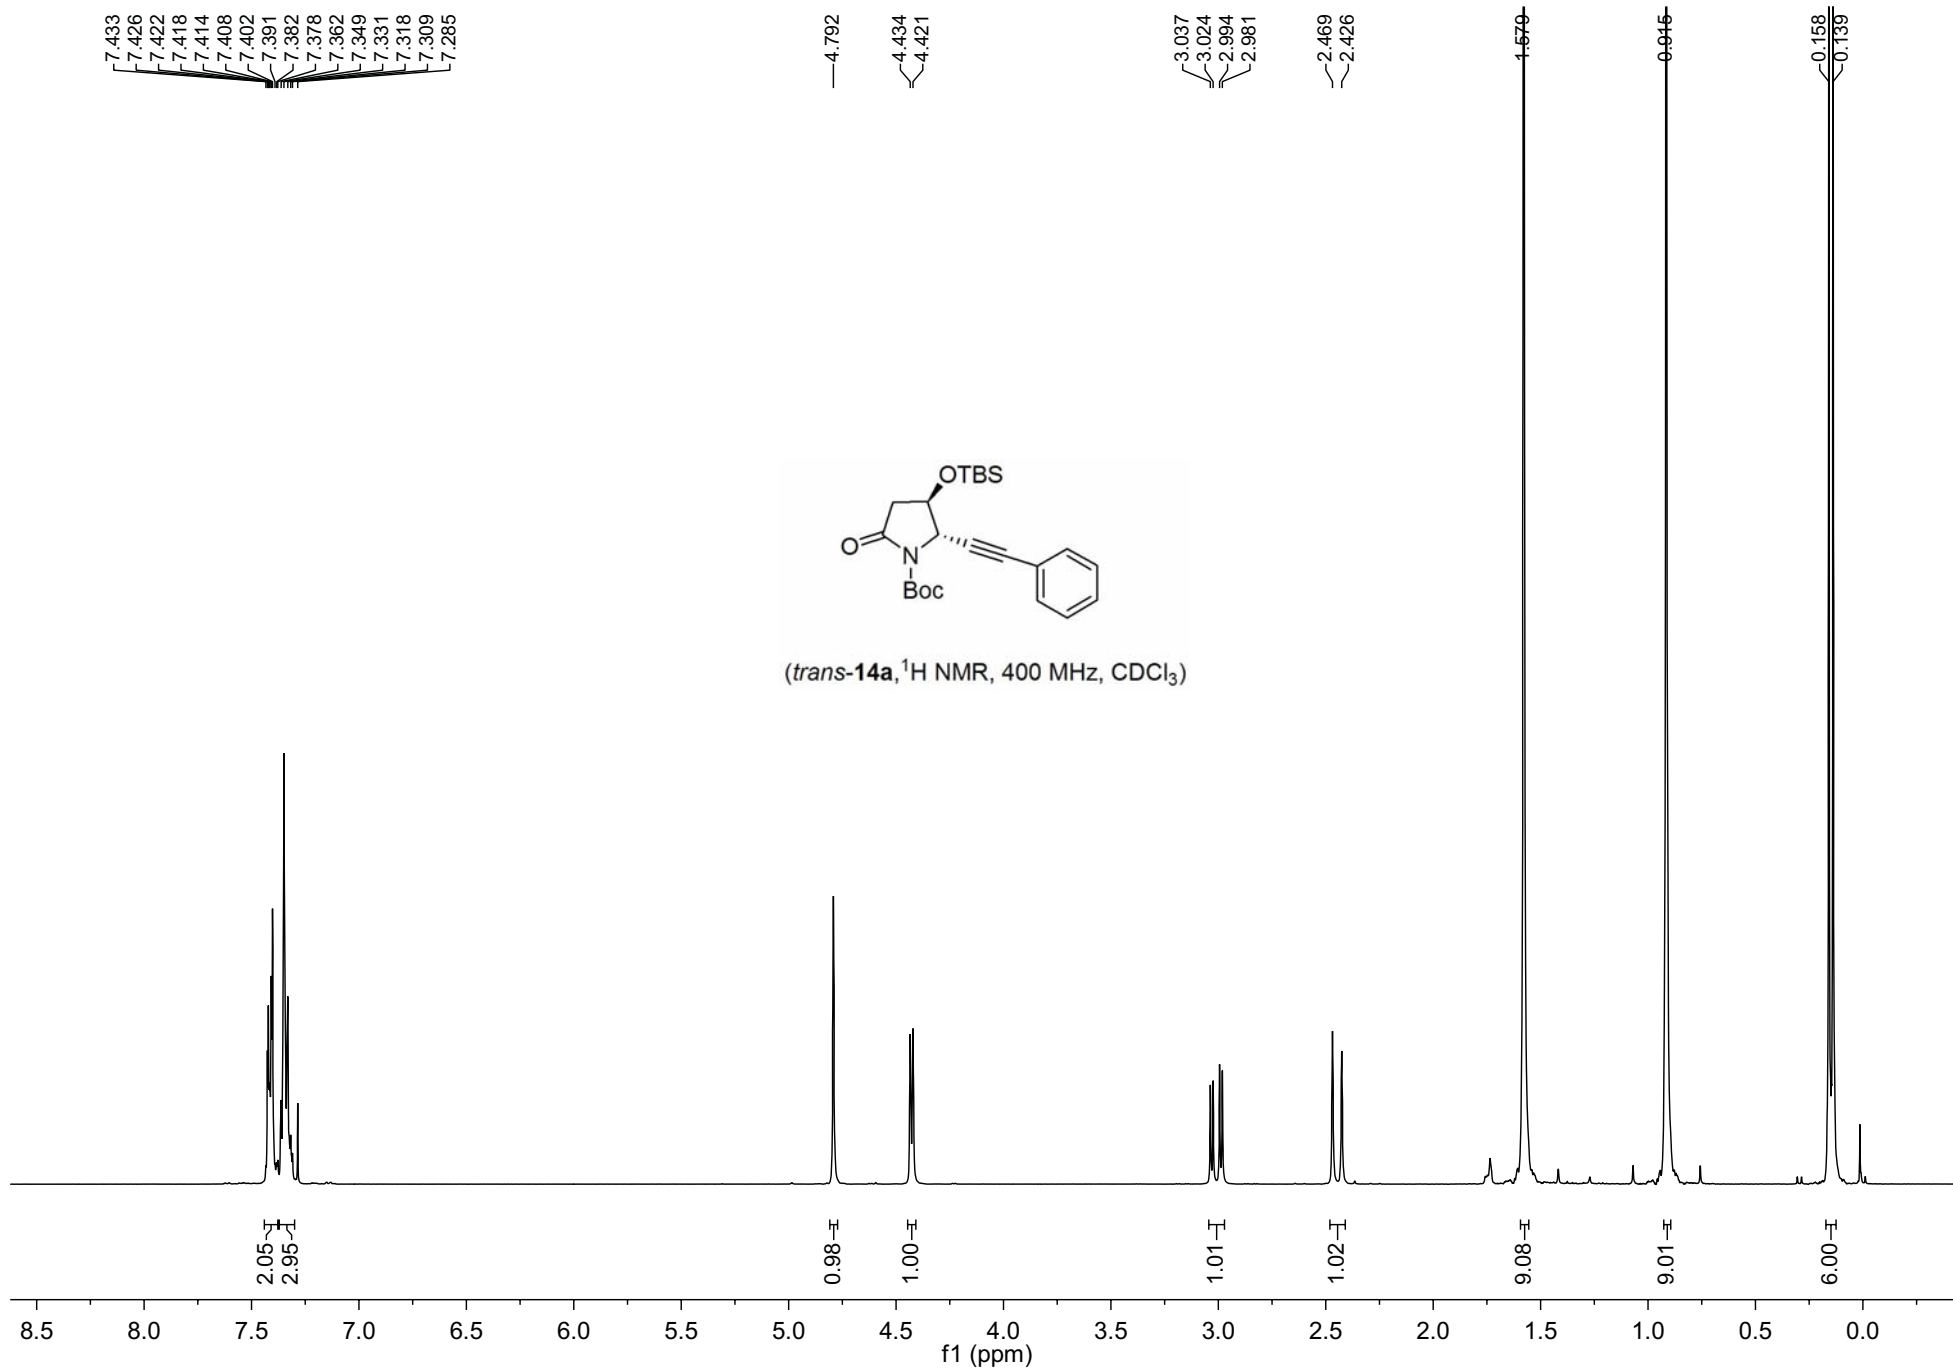

—171.713  
—149.383  
—131.689  
—128.824  
—128.398  
—121.935  
—85.530  
—84.191  
—83.393  
—70.480  
—59.222  
—41.927  
—28.052  
—25.655  
—17.997  
—4.826

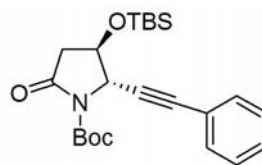

(*trans*-14a,  $^{13}\text{C}$  NMR, 100 MHz,  $\text{CDCl}_3$ )

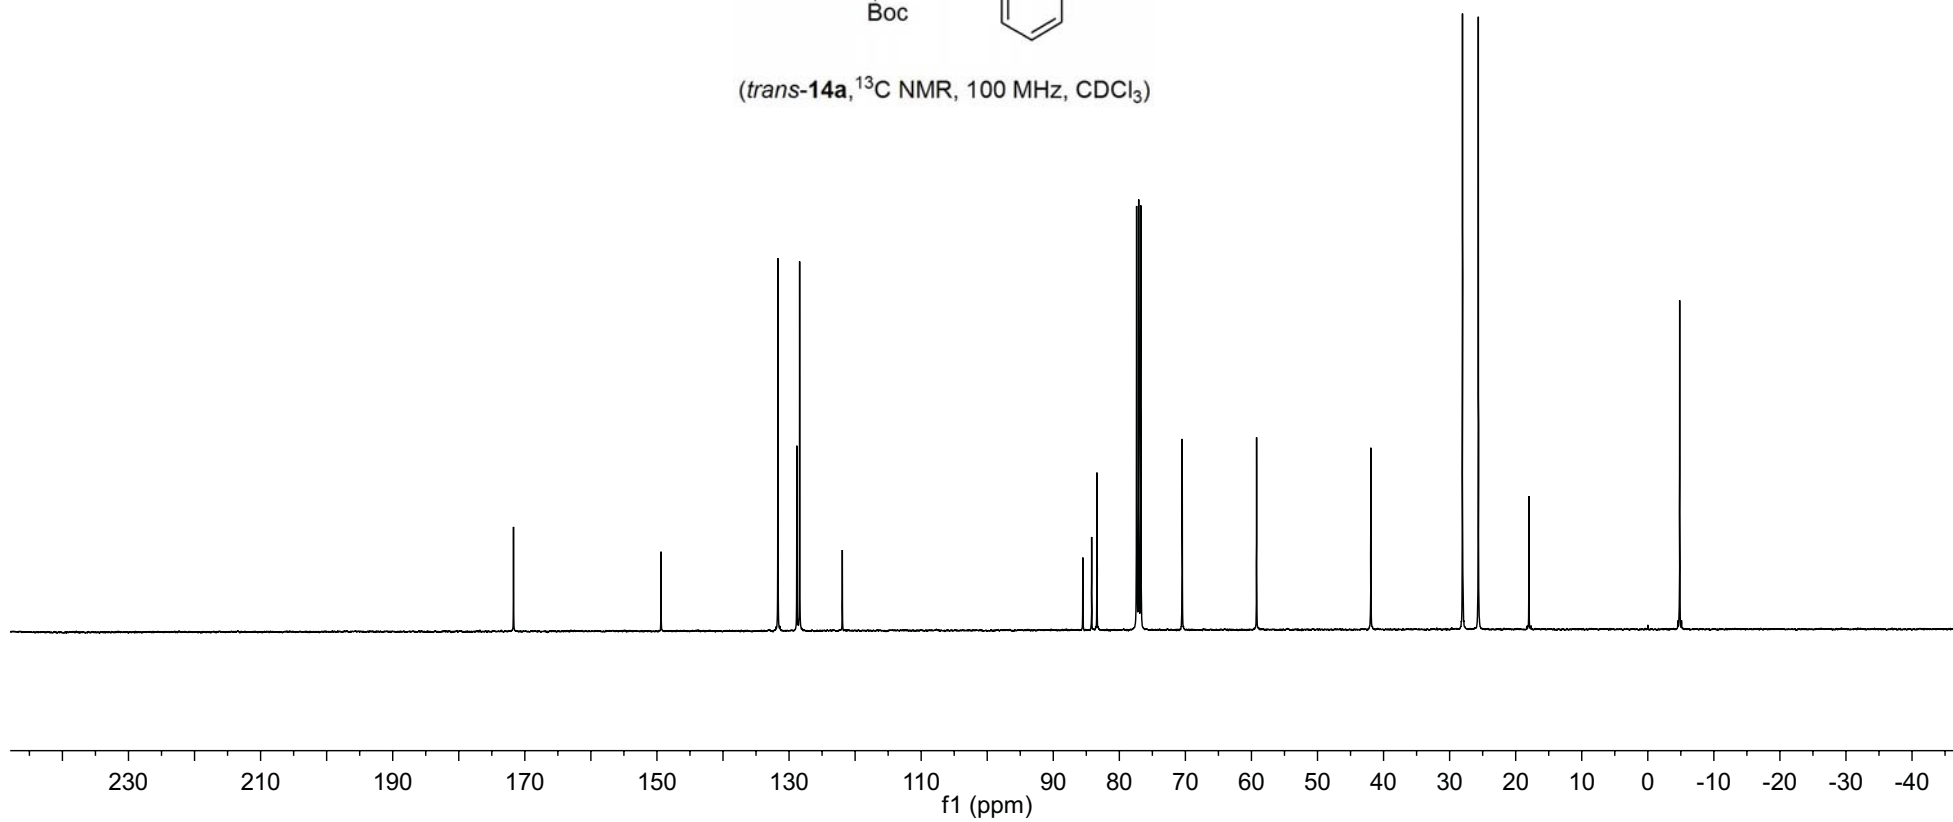

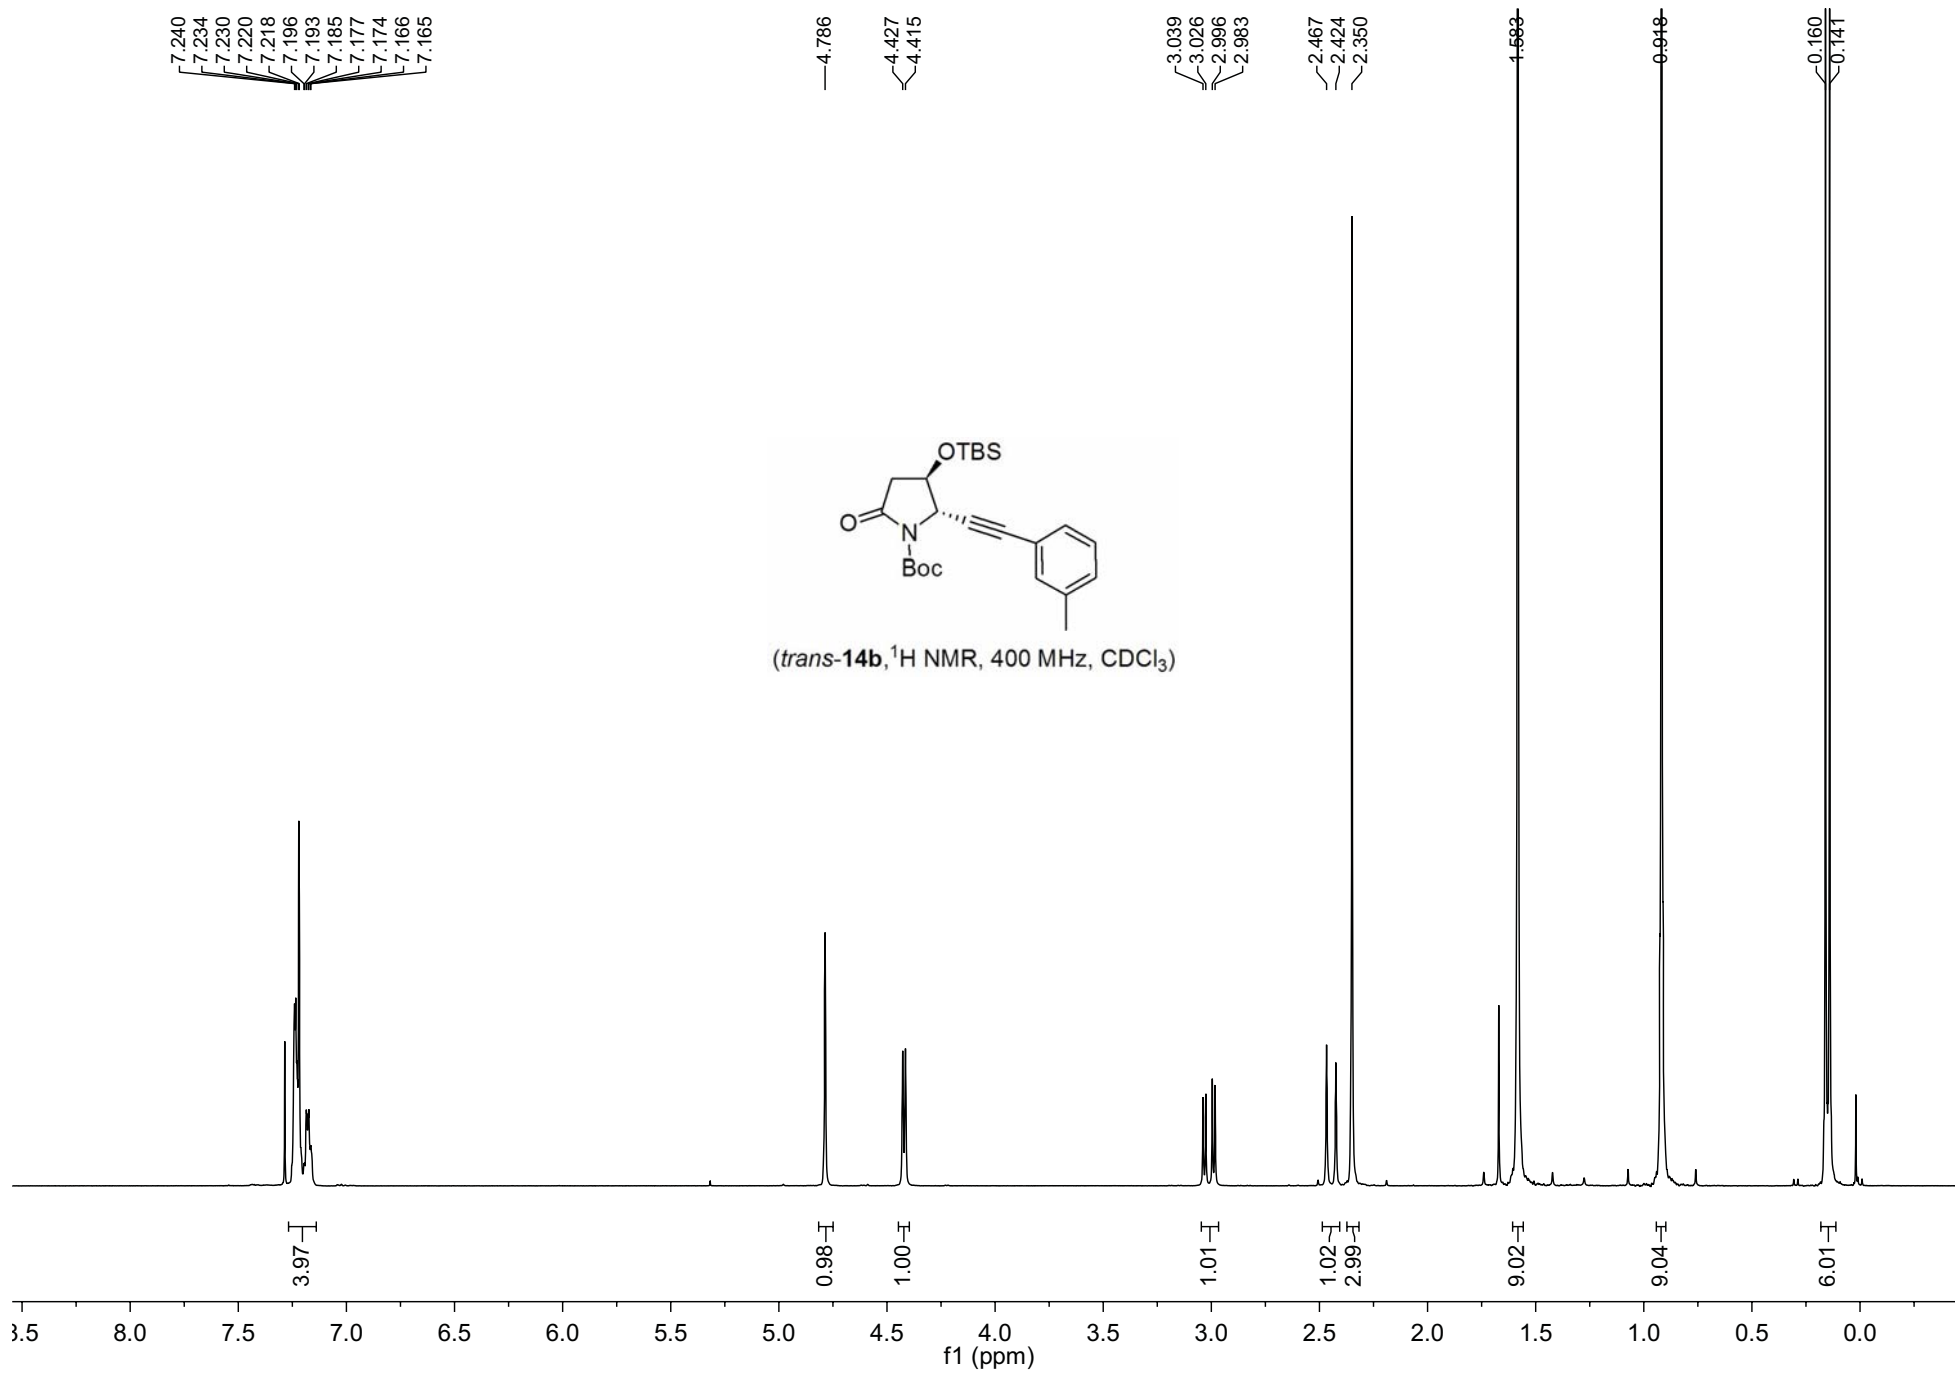

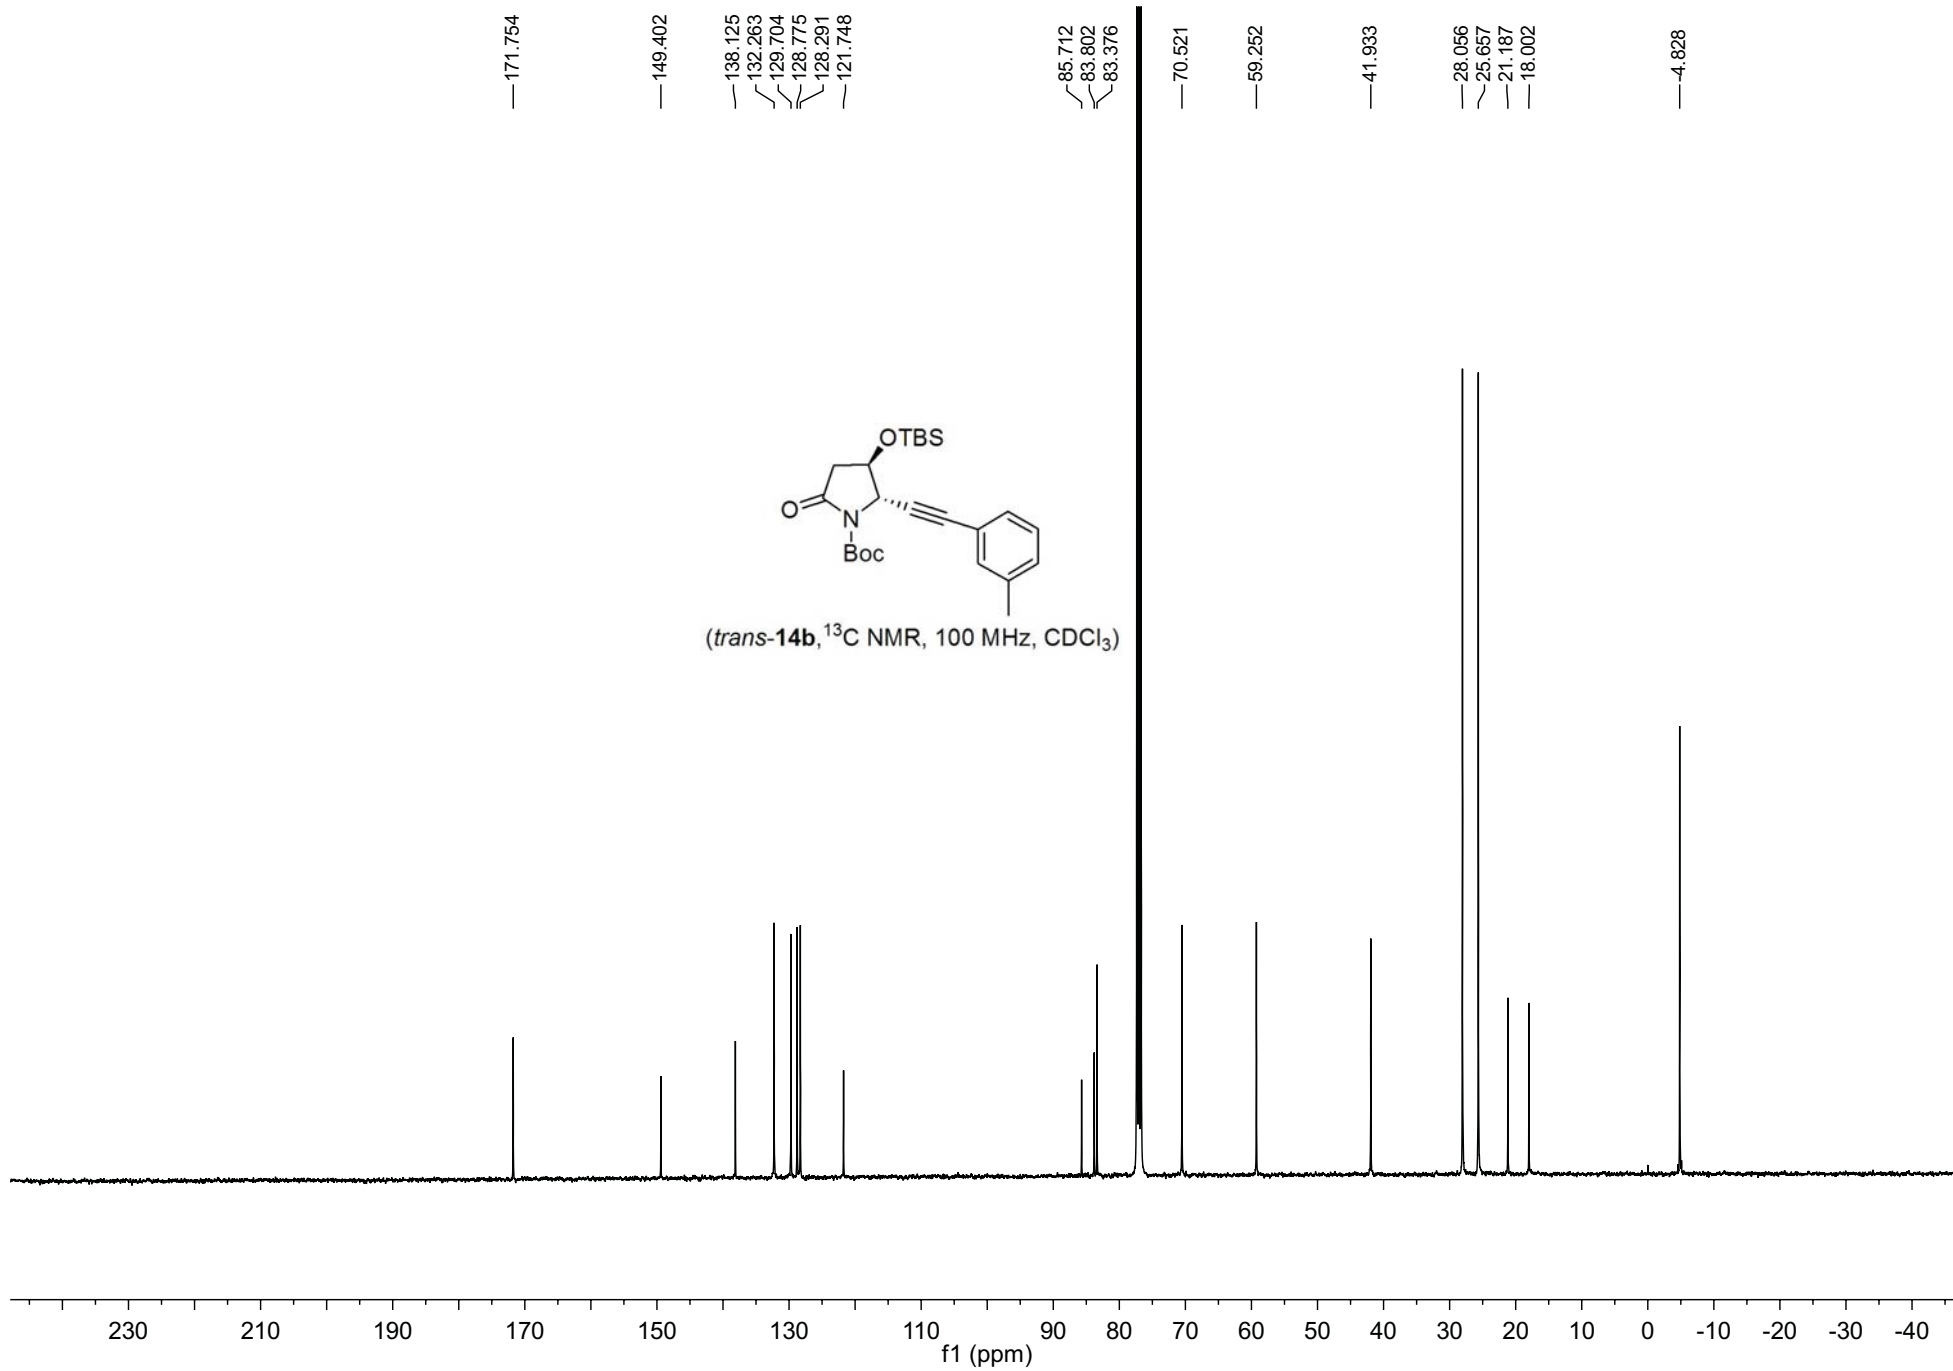

7.408  
7.395  
7.386  
7.373  
7.048  
7.031  
7.027  
7.022  
7.005

4.772

4.417  
4.404

3.021  
3.008  
2.977  
2.965

2.463  
2.420

1.570

0.907

0.149  
0.131

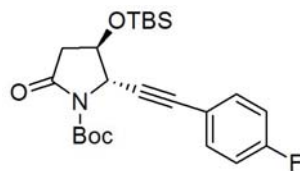

(*trans*-14c, <sup>1</sup>H NMR, 400 MHz, CDCl<sub>3</sub>)

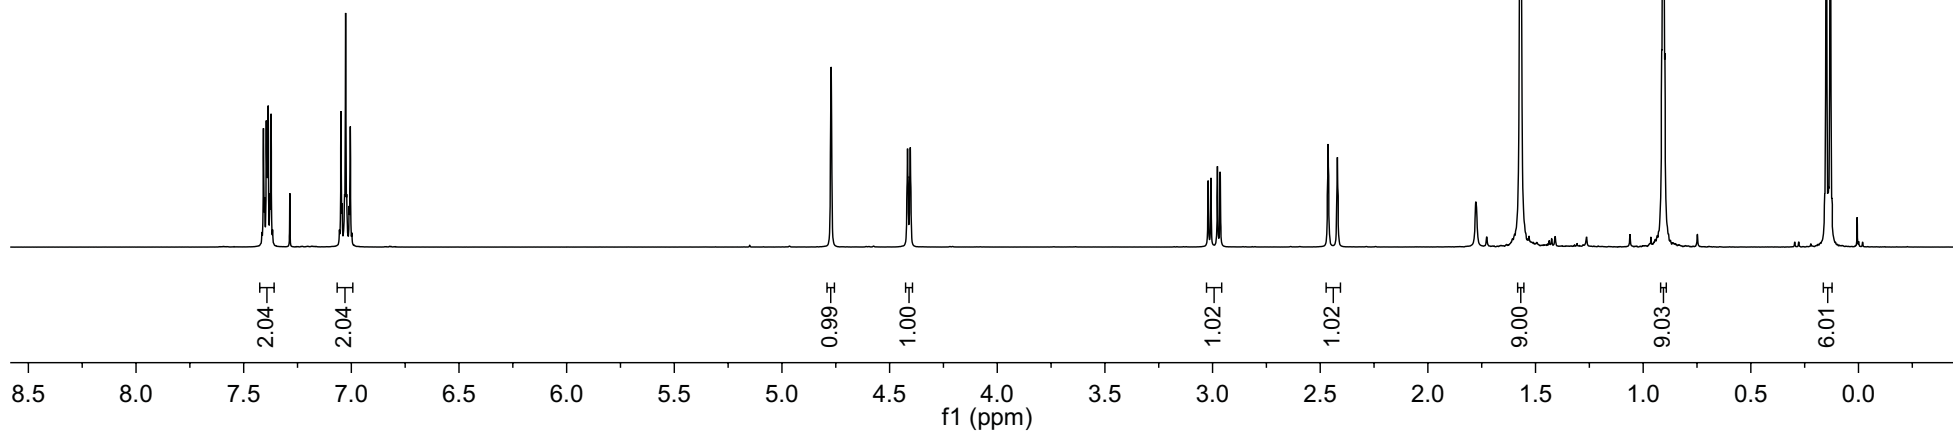

— 171.657  
— 164.008  
— 161.519  
— 149.390  
— 133.691  
— 133.607  
— 118.009  
— 117.977  
— 115.846  
— 115.626  
— 84.489  
— 83.930  
— 83.452  
— 70.404  
— 59.134  
— 41.919  
— 28.039  
— 25.635  
— 17.987  
— 4.842

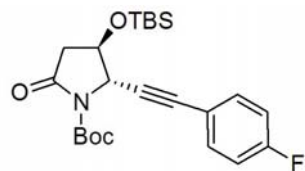

(*trans*-**14c**,  $^{13}\text{C}$  NMR, 100 MHz,  $\text{CDCl}_3$ )

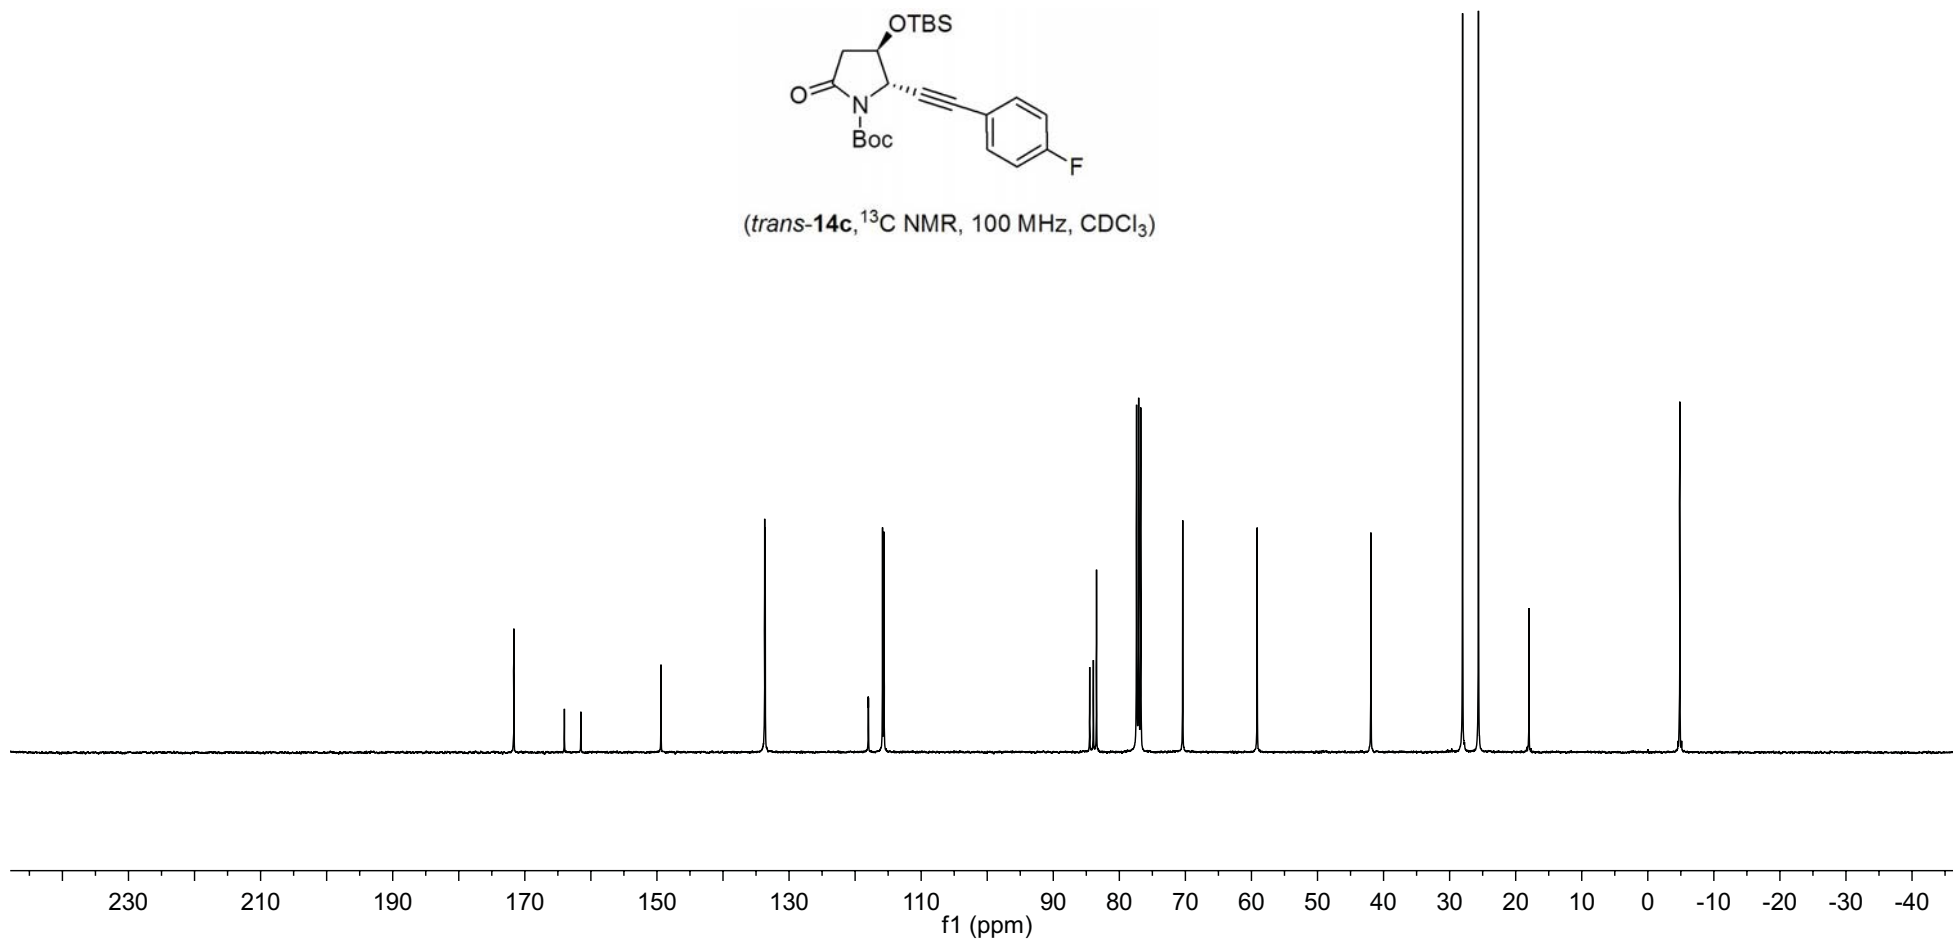

-109.881

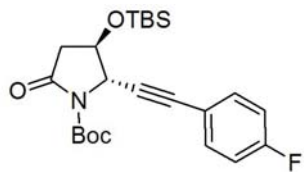

(*trans*-**14c**,  $^{19}\text{F}$  NMR, 376 MHz,  $\text{CDCl}_3$ )

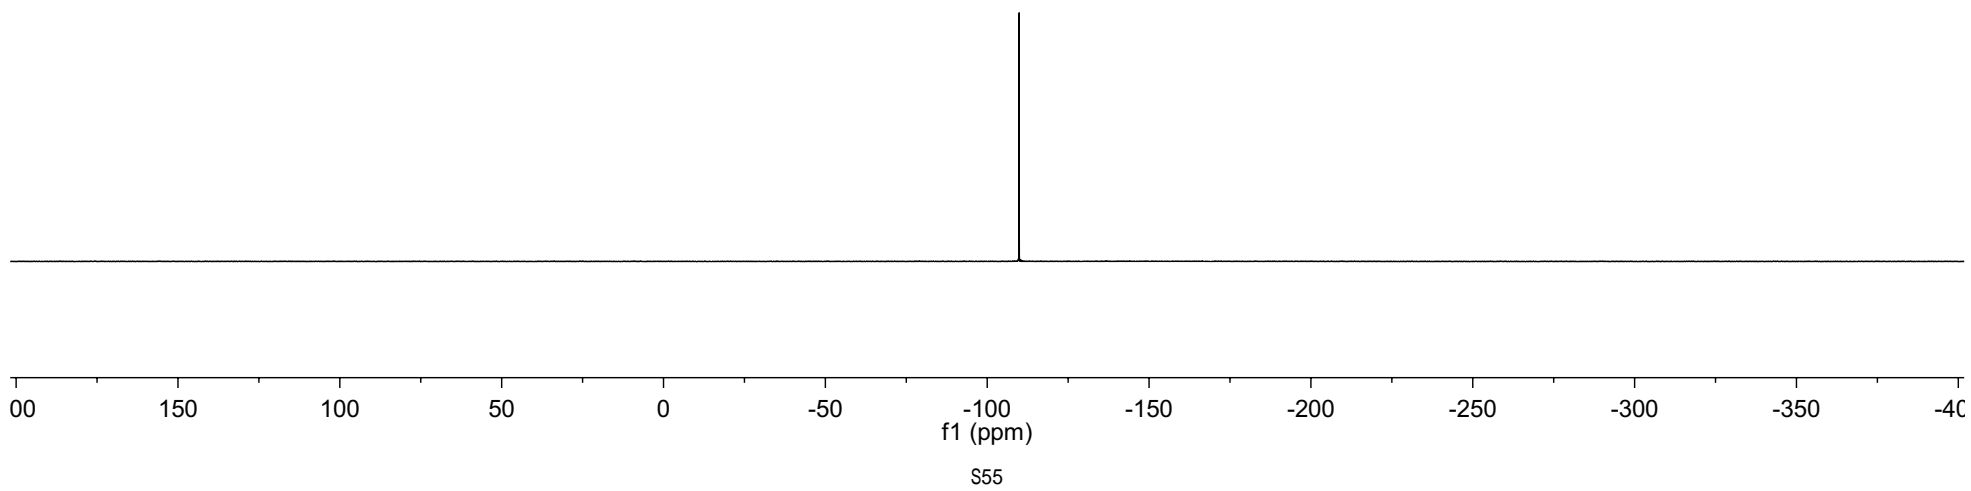

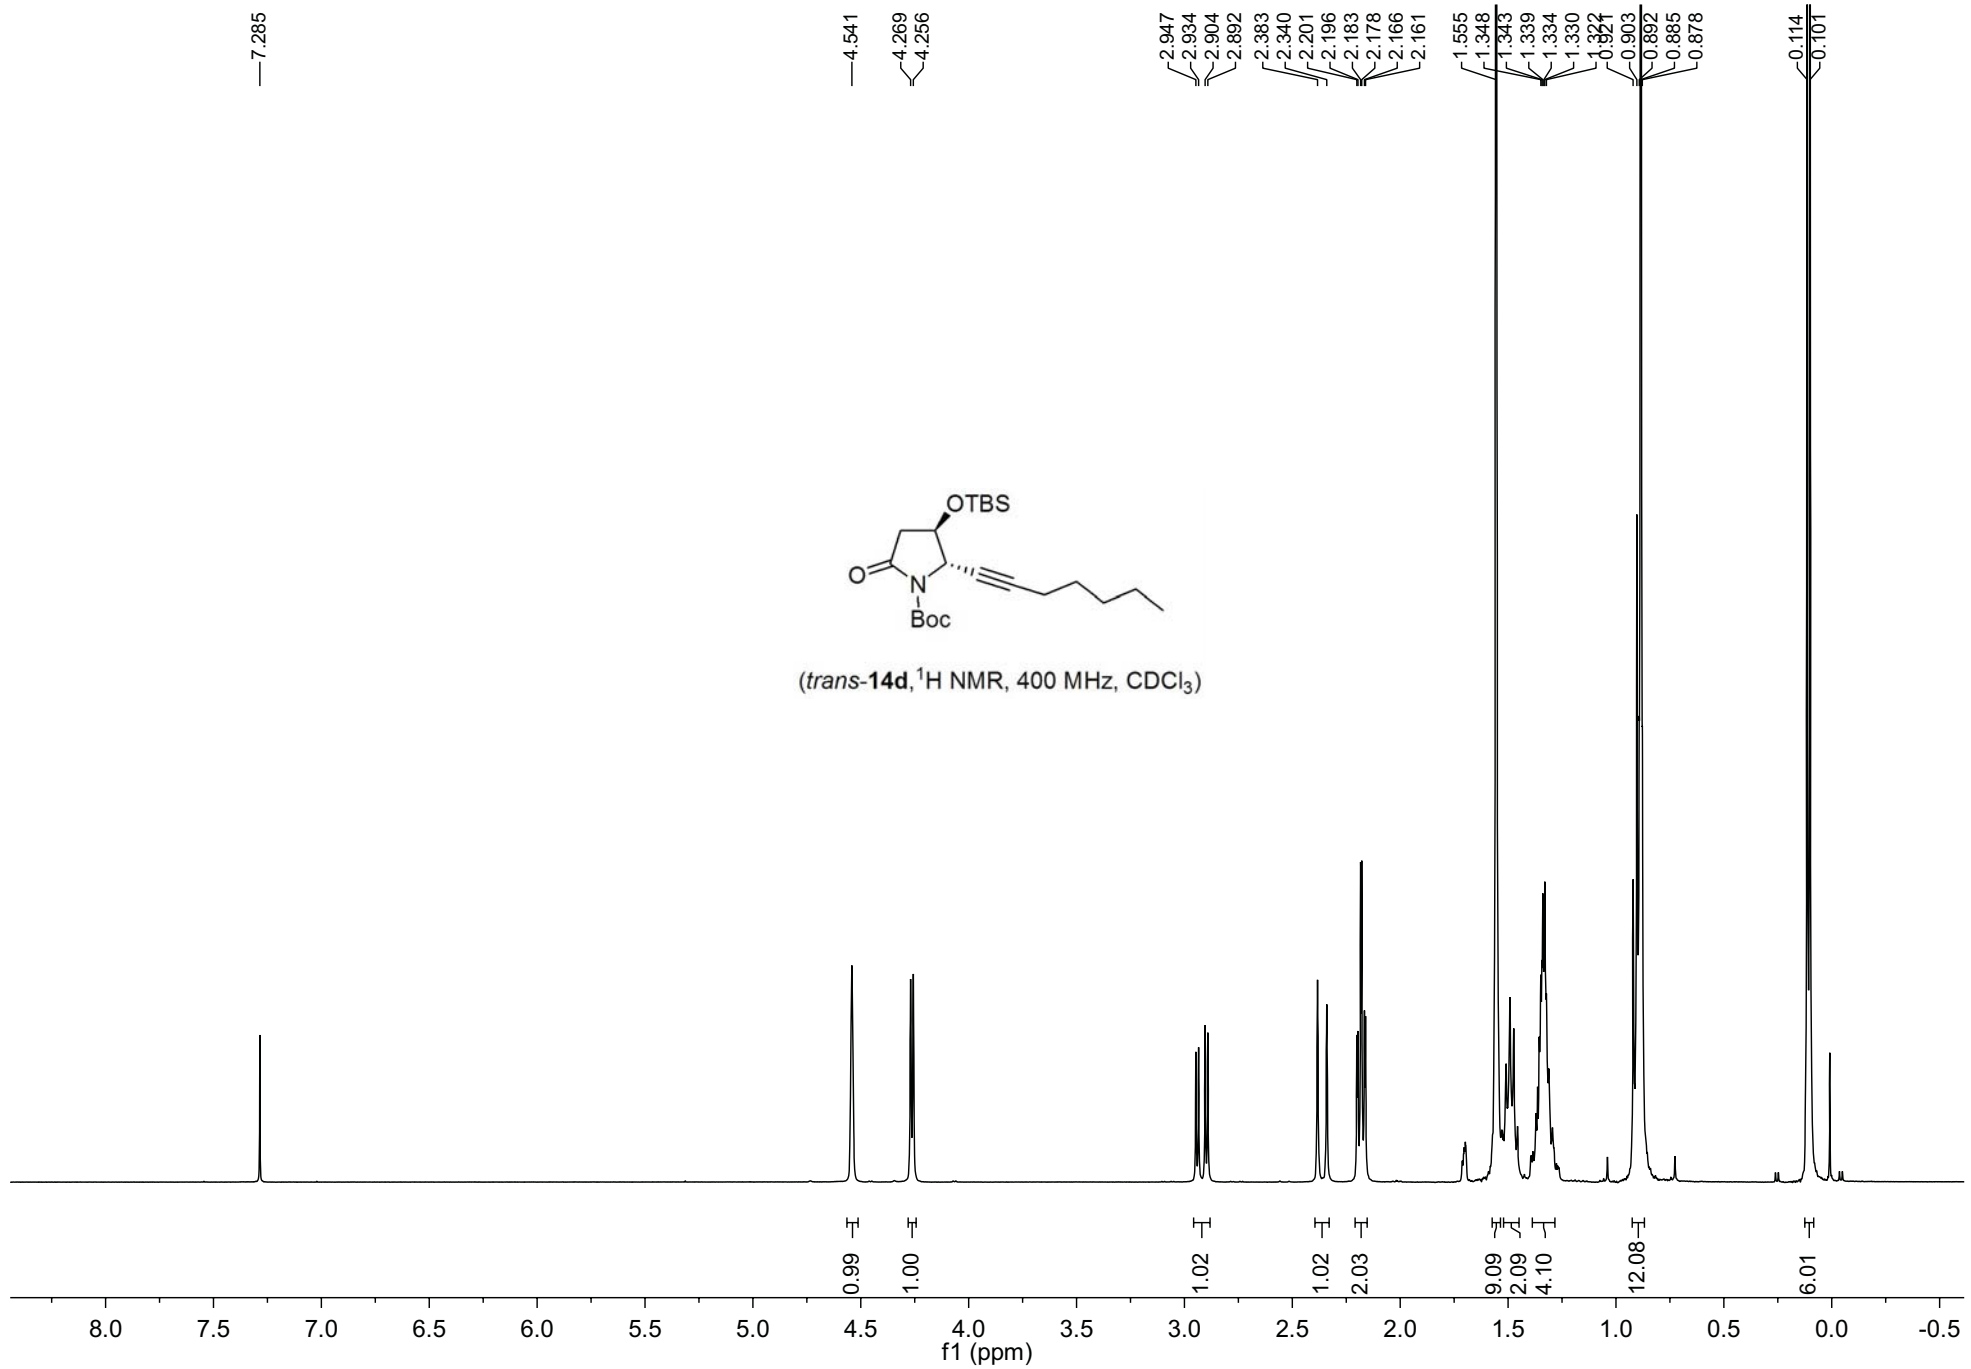



—171.911

—149.508

—86.427

—83.063

—75.413

—70.715

—58.957

—41.843

30.947

28.105

28.006

25.635

22.111

18.561

17.975

13.913

—4.883

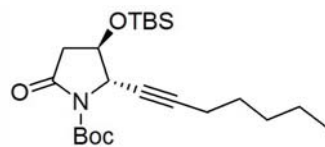

(*trans*-14d,  $^{13}\text{C}$  NMR, 100 MHz,  $\text{CDCl}_3$ )

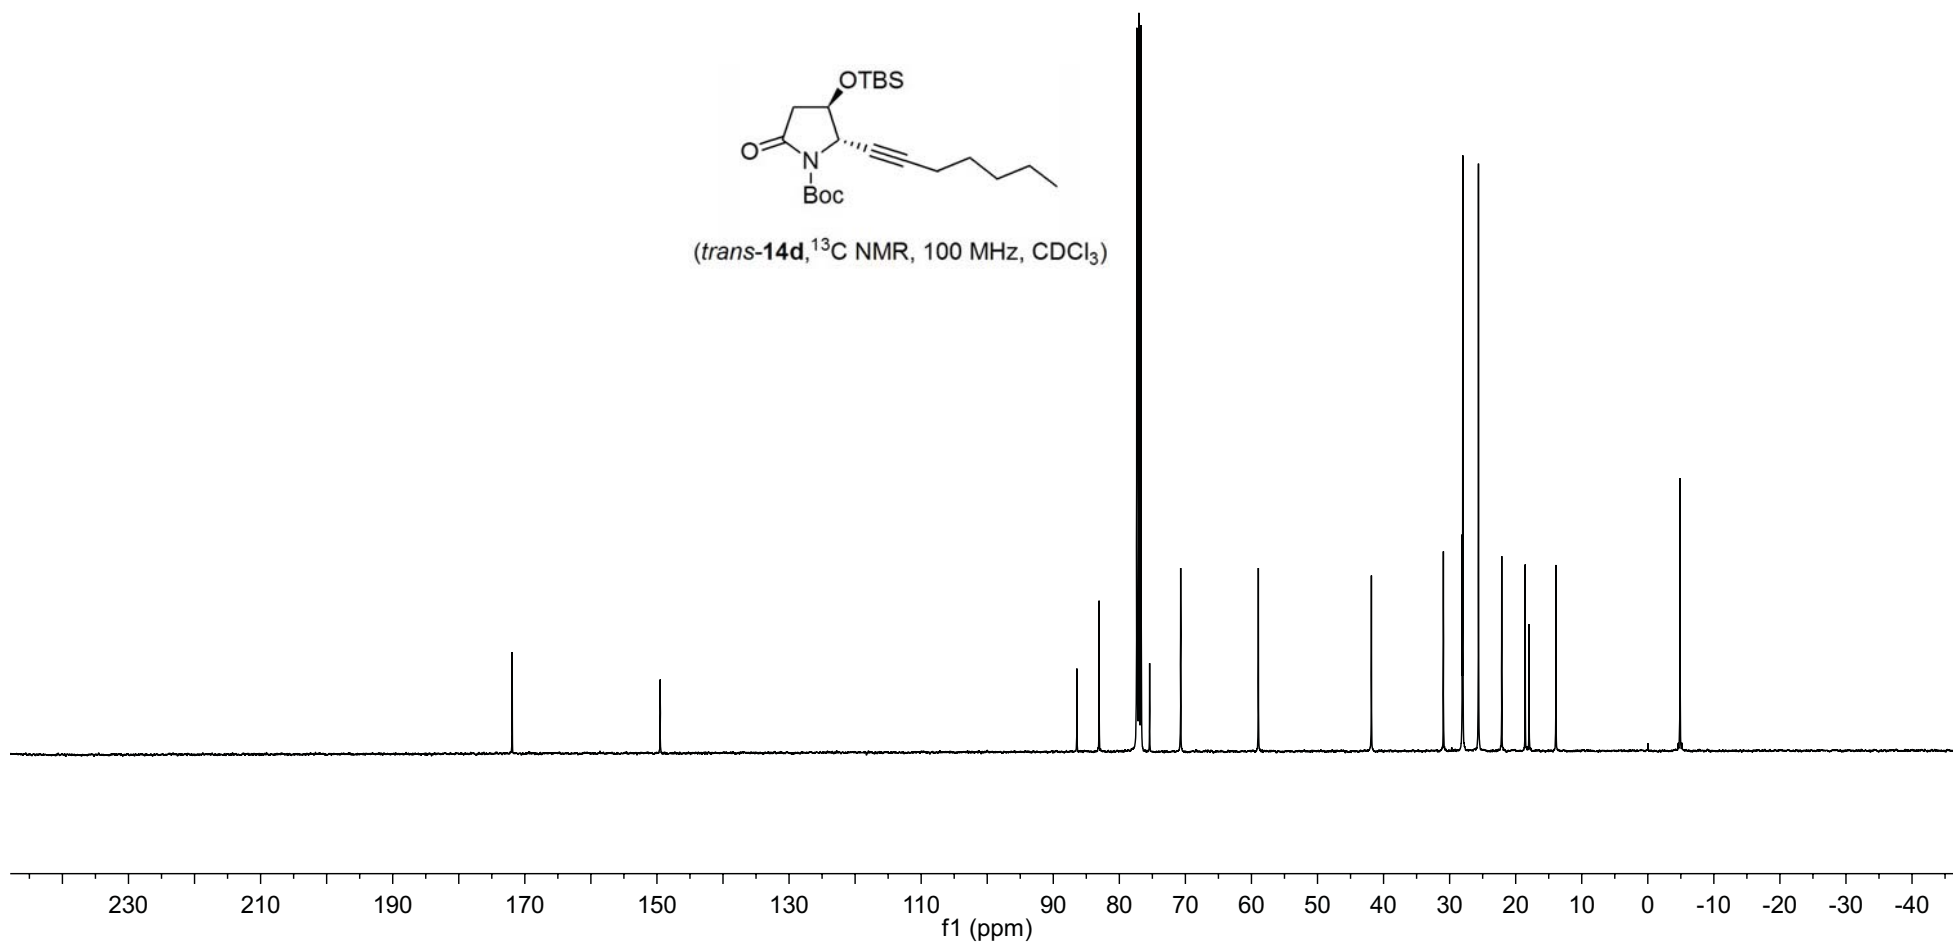

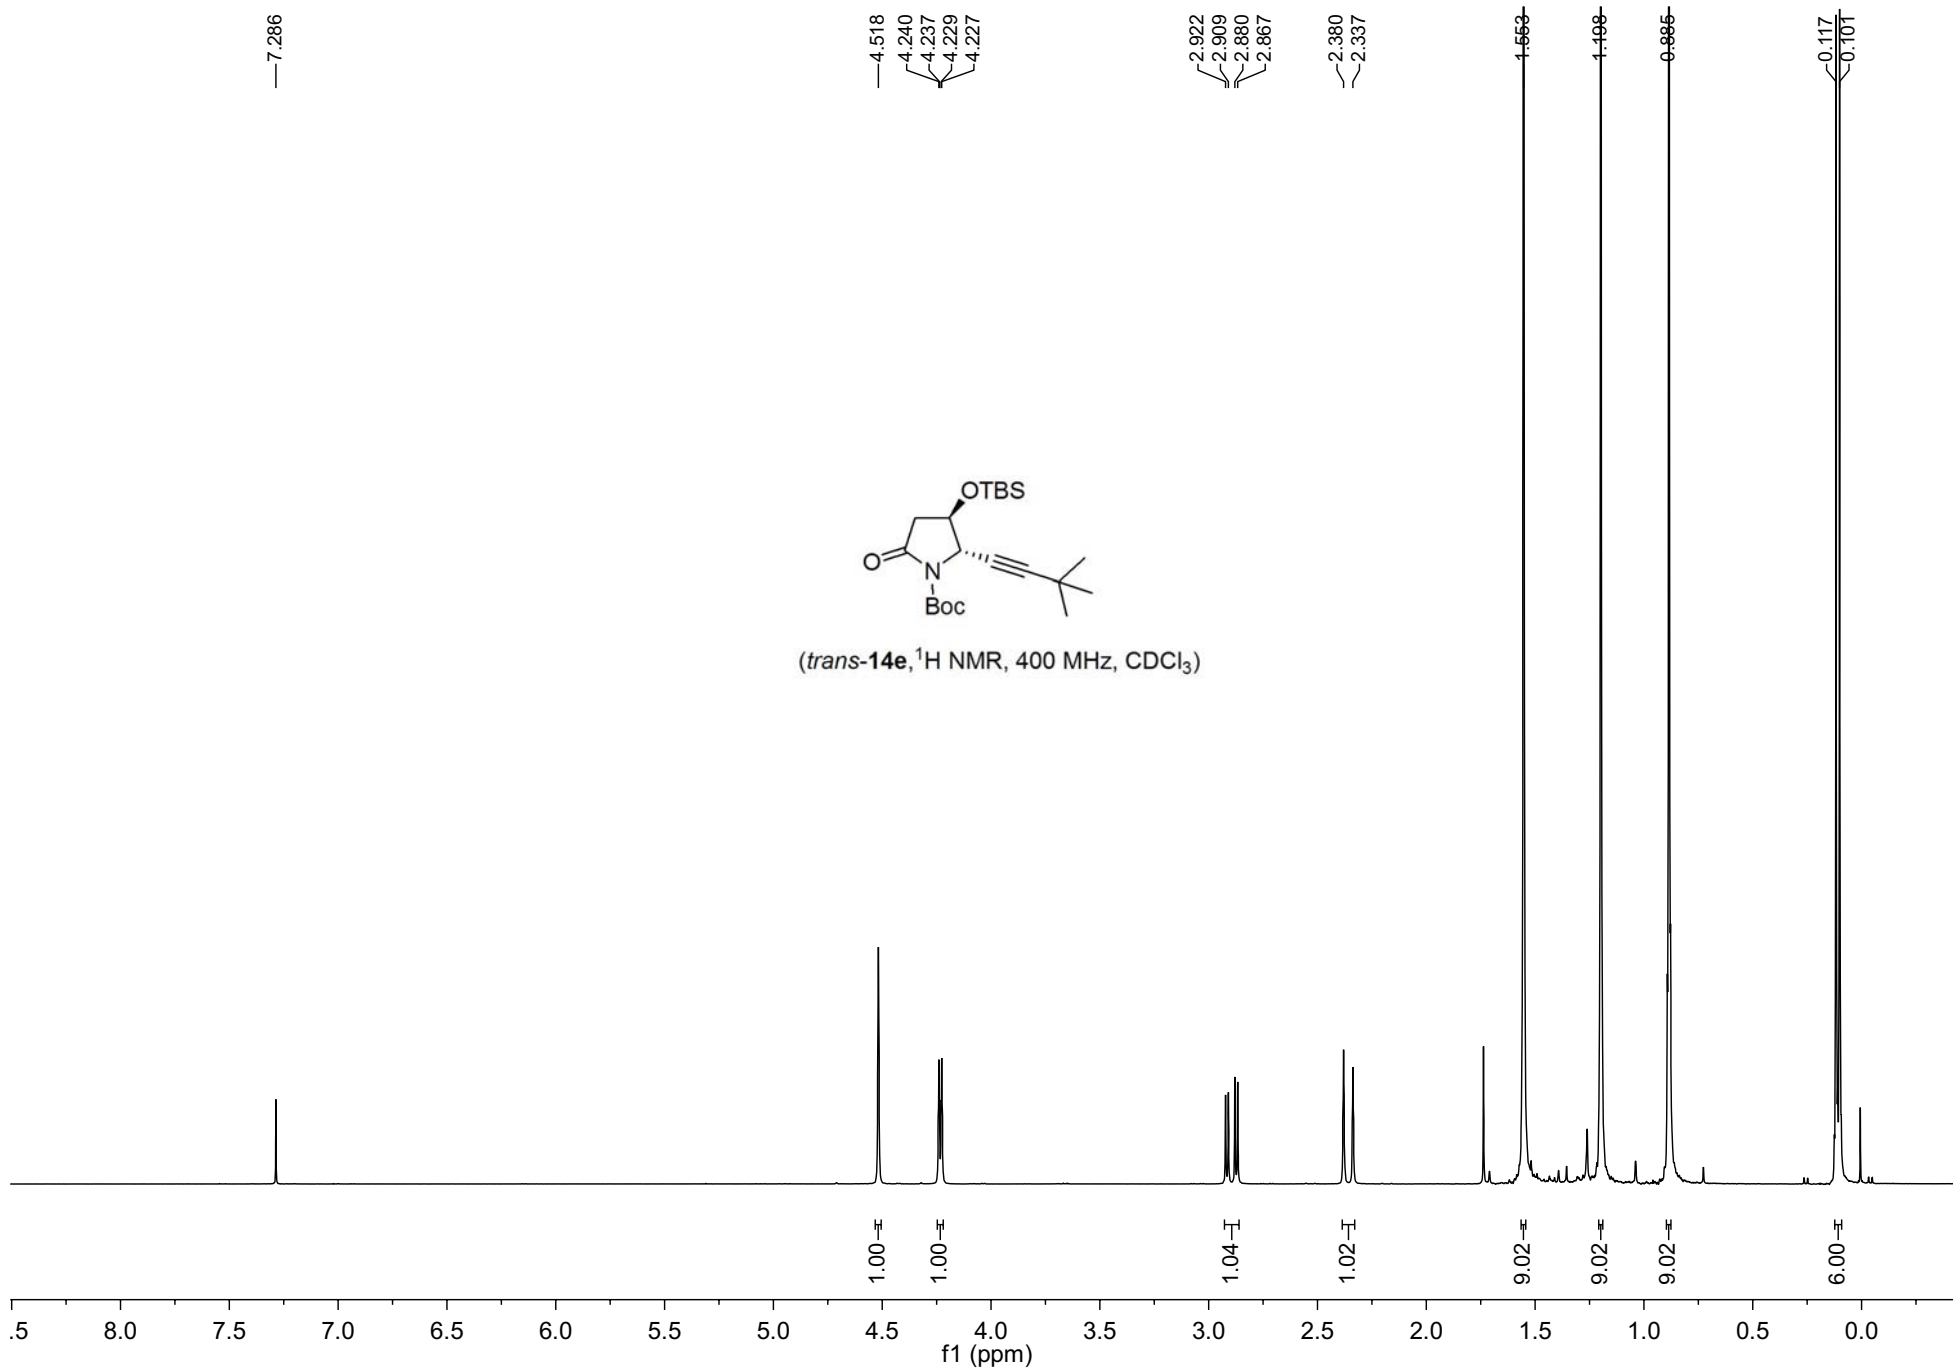

—172.147

—149.308

—94.397

—82.992

—73.894

—70.713

—58.958

—41.743

30.837

27.989

27.349

25.633

—17.967

—4.864

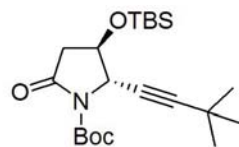

(*trans*-14e, <sup>13</sup>C NMR, 100 MHz, CDCl<sub>3</sub>)

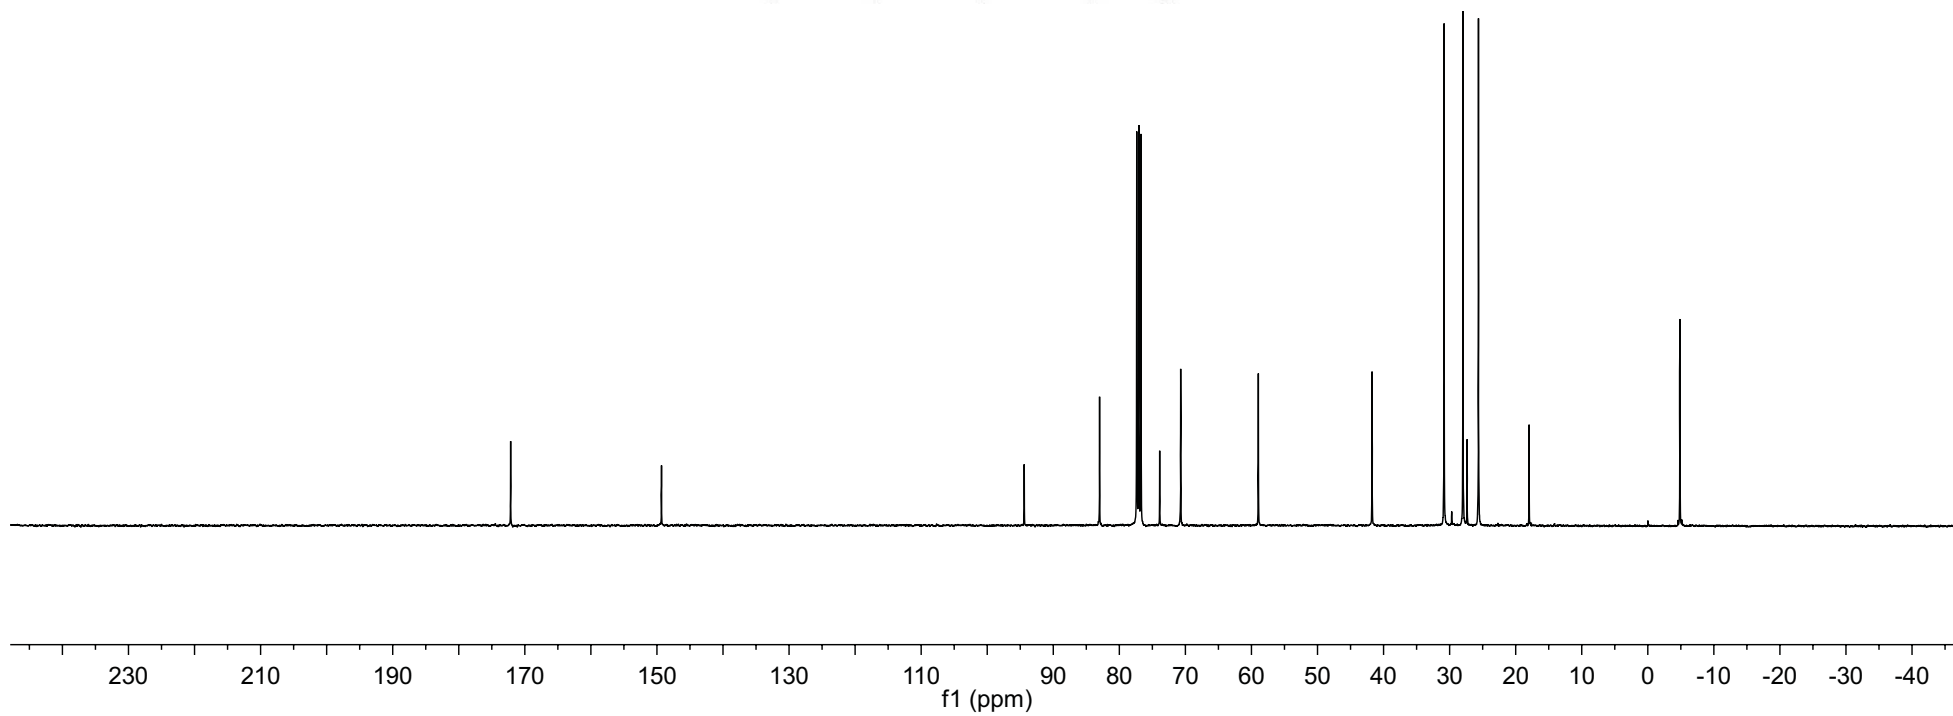

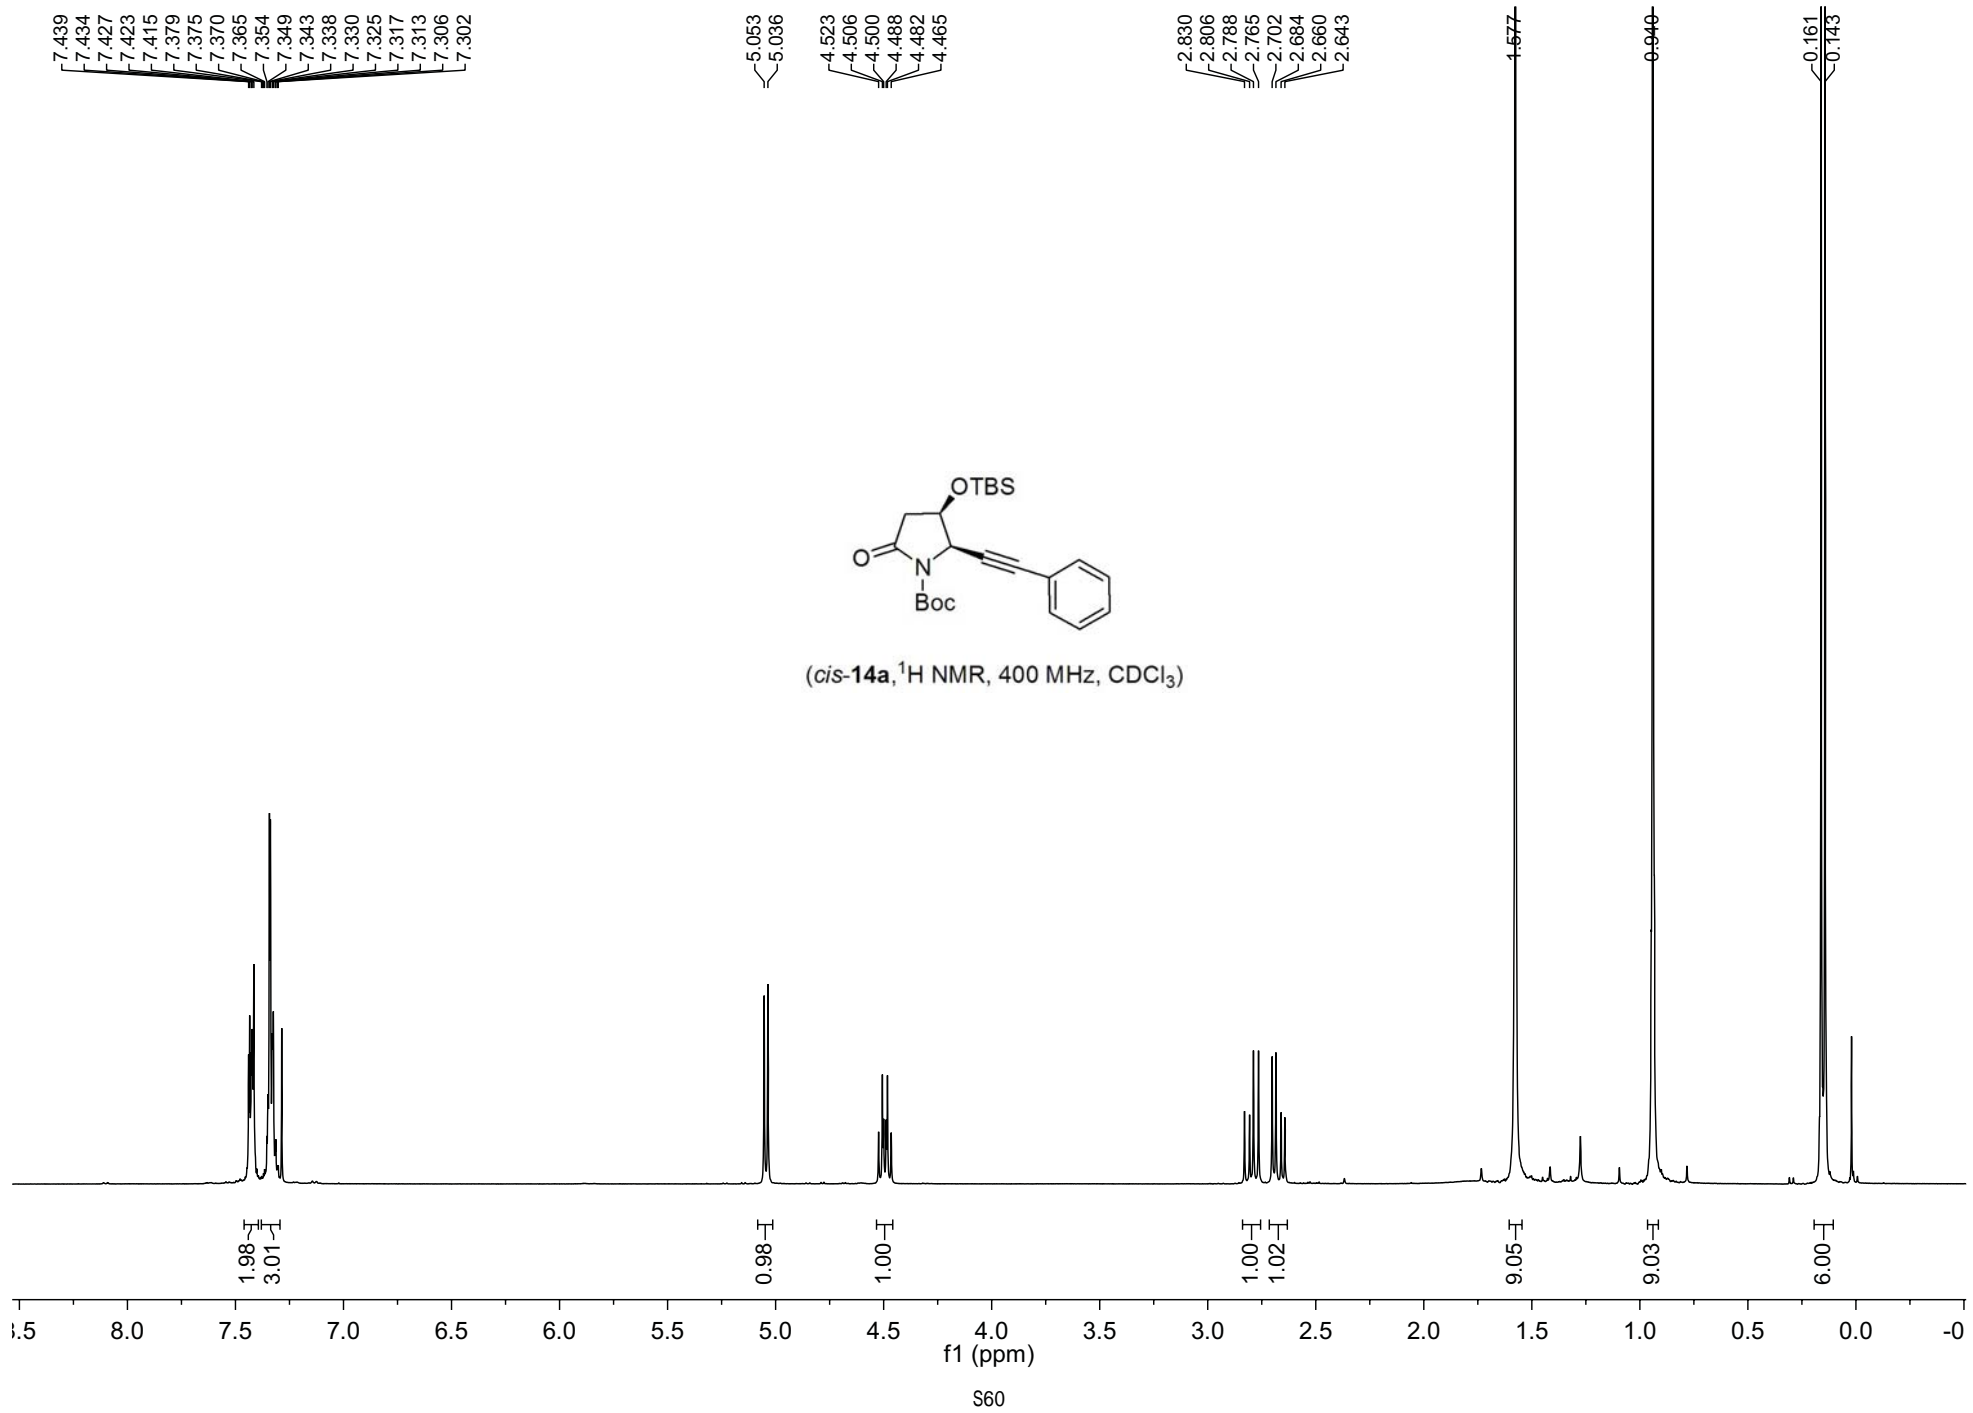

—170.599  
—149.035  
—131.690  
—128.469  
—128.306  
—122.586  
—86.266  
—83.580  
—83.303  
—66.061  
—55.625  
—40.822  
—28.040  
—25.644  
—18.023  
—4.722  
—4.812

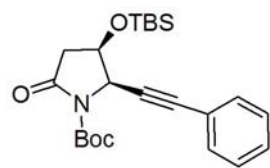

(*cis*-14a, <sup>13</sup>C NMR, 100 MHz, CDCl<sub>3</sub>)

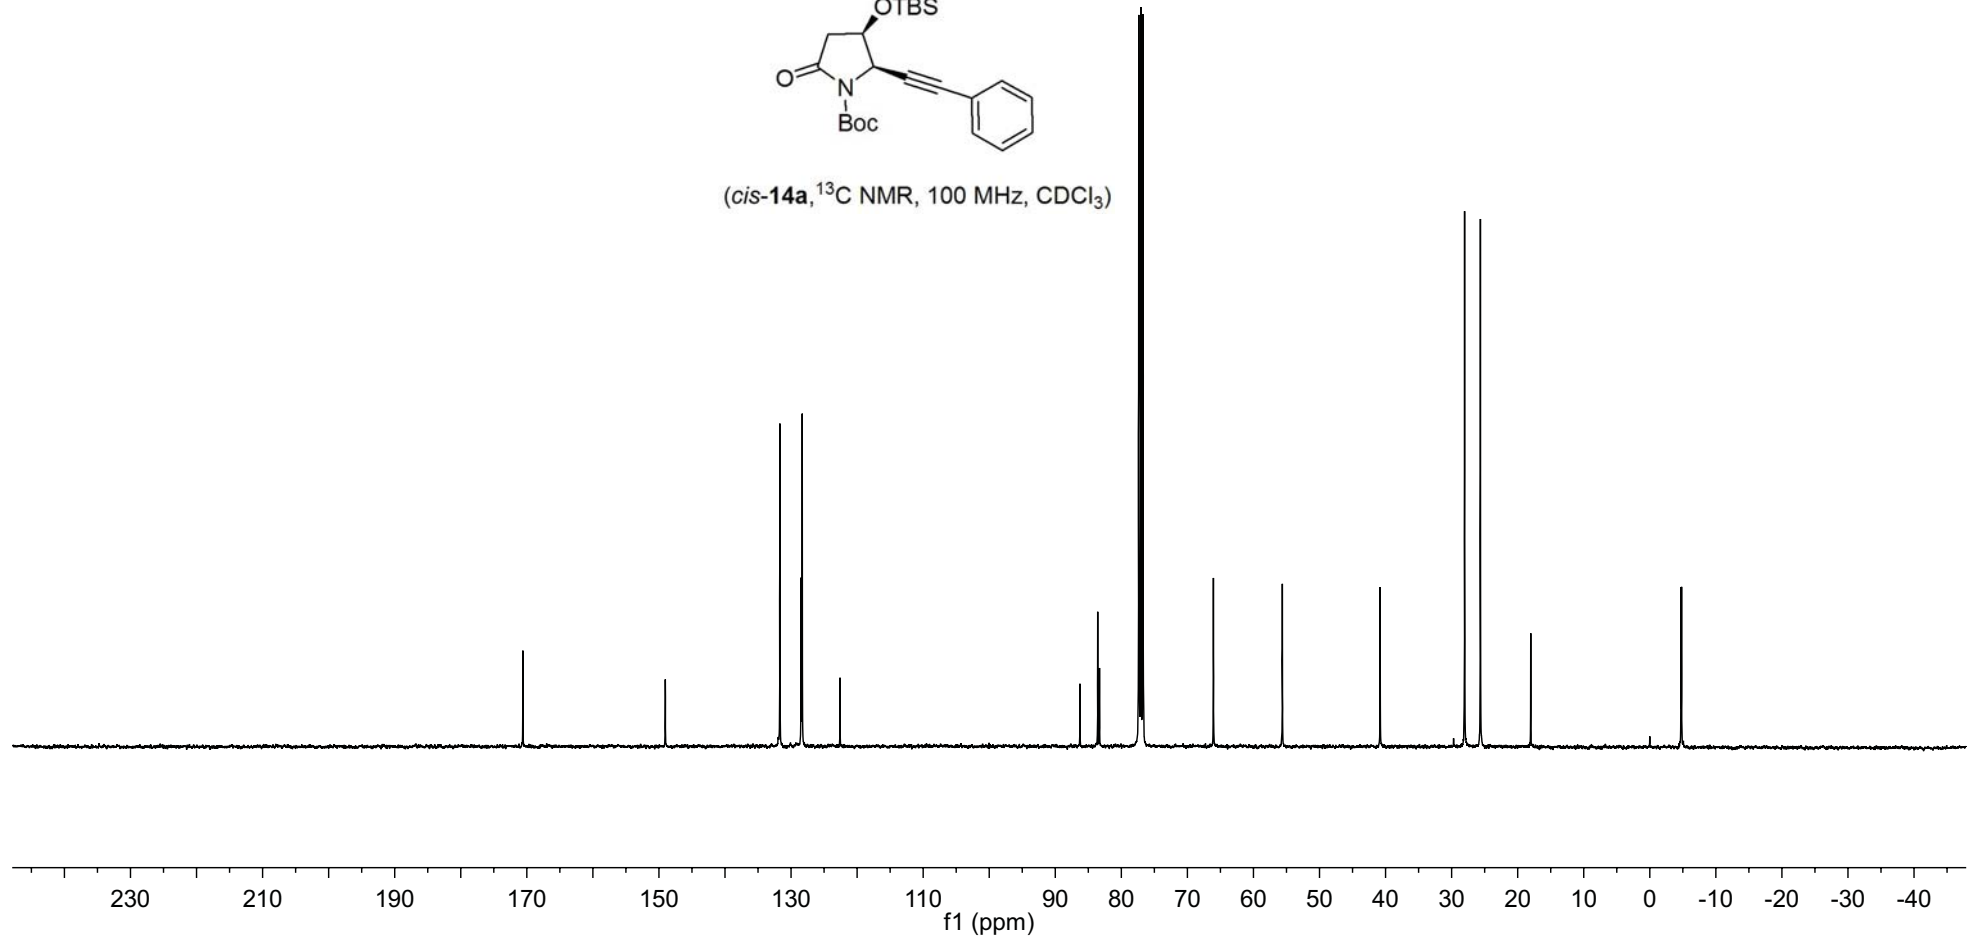

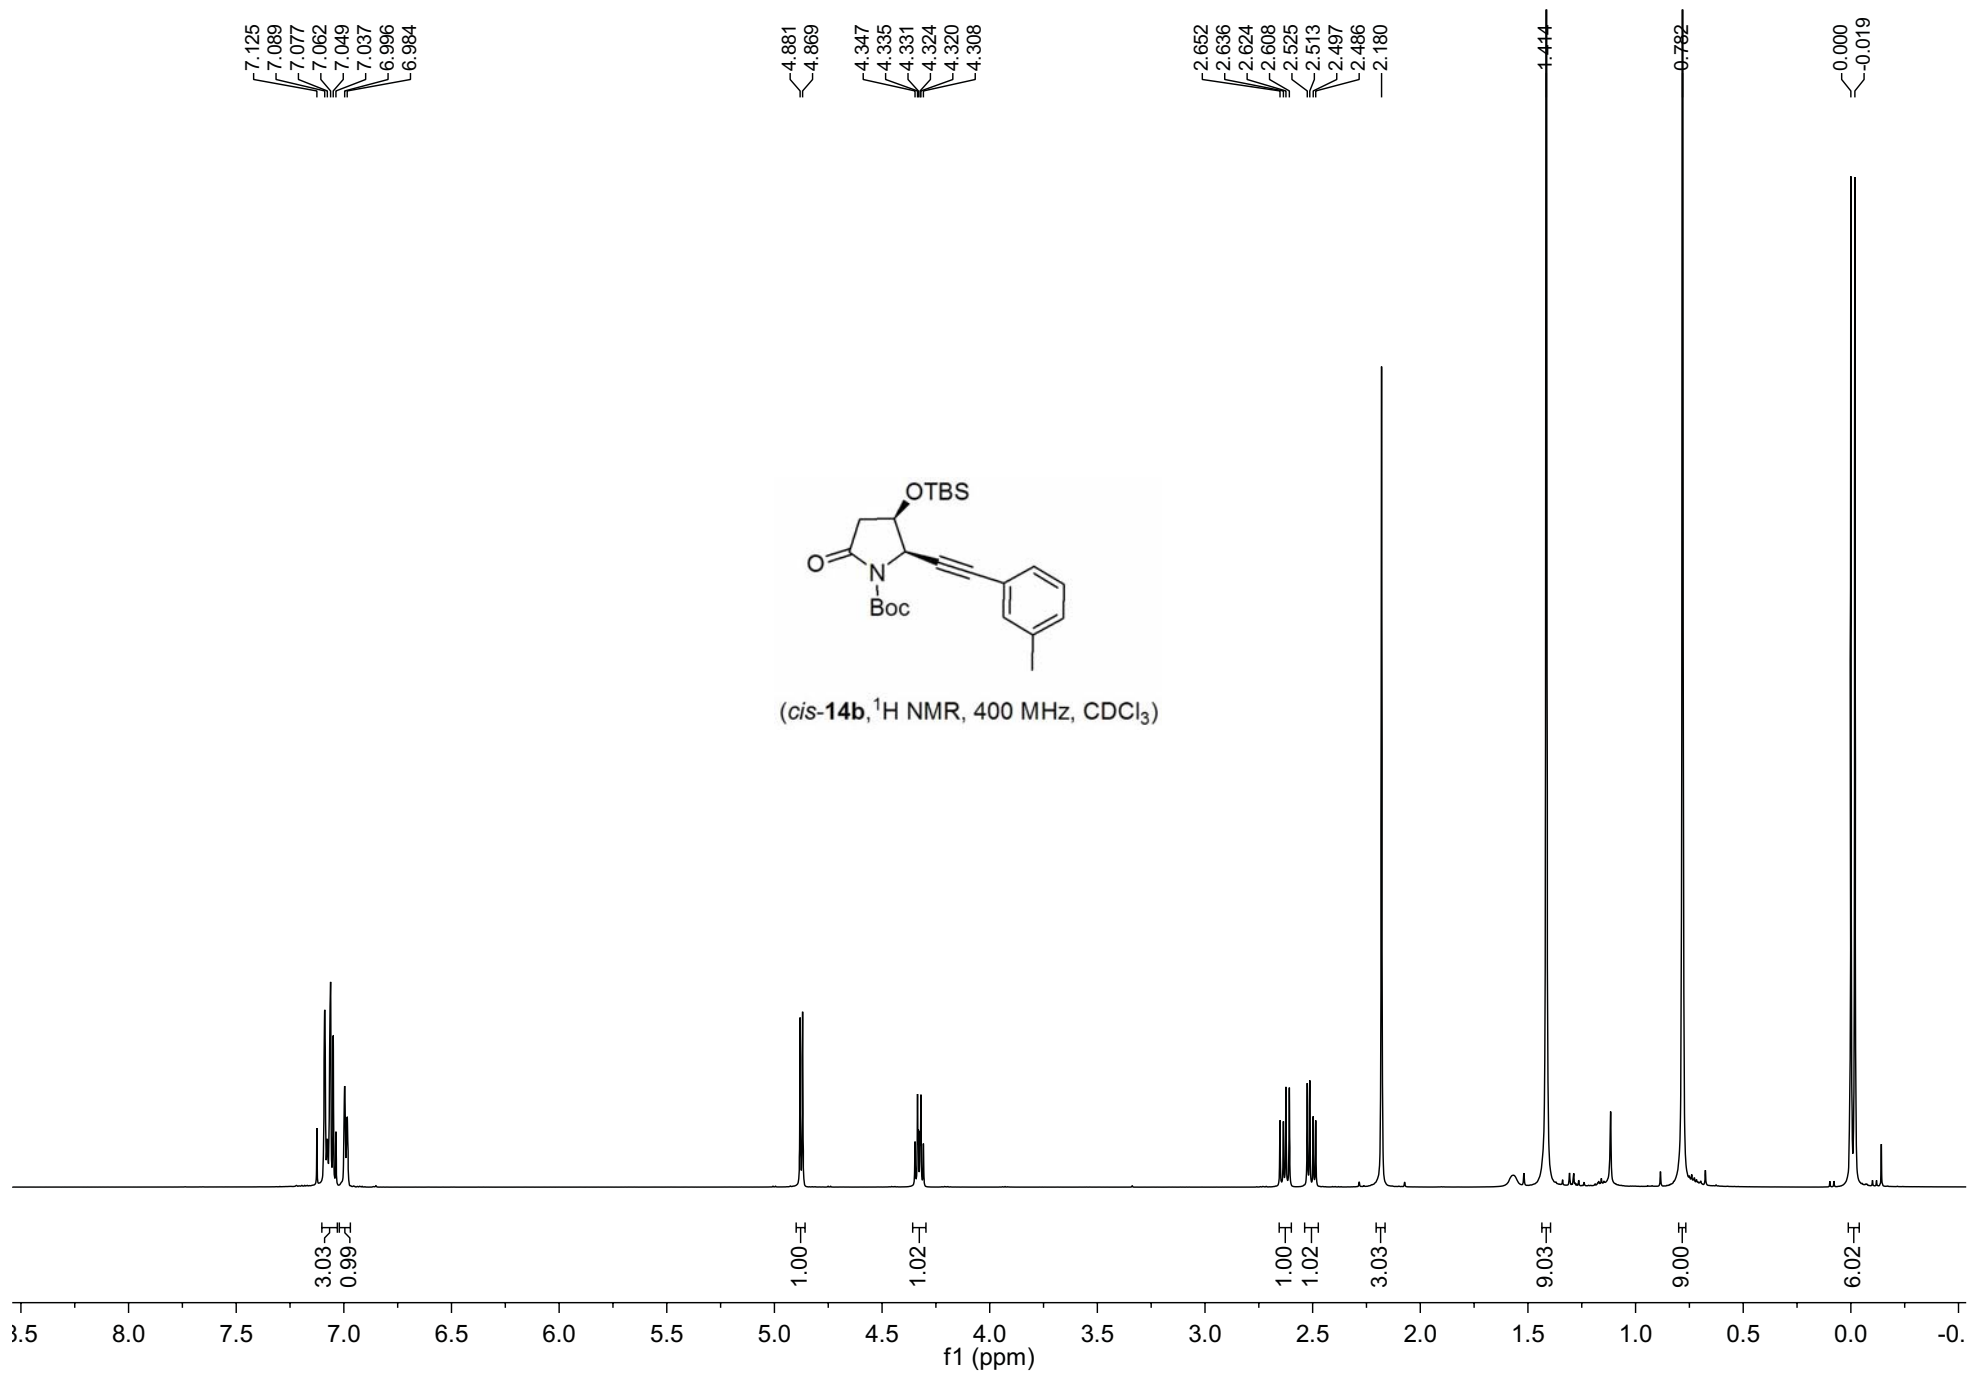

— 170.537  
— 149.047  
— 137.946  
— 132.316  
— 129.342  
— 128.764  
— 128.178  
— 122.421  
  
— 86.455  
— 83.515  
— 82.919  
  
— 66.101  
— 55.631  
  
— 40.817  
  
— 28.040  
— 25.653  
— 21.206  
— 18.022  
  
— 4.719  
— 4.817

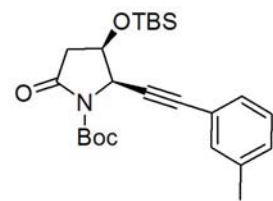

(*cis*-14b, <sup>13</sup>C NMR, 100 MHz, CDCl<sub>3</sub>)

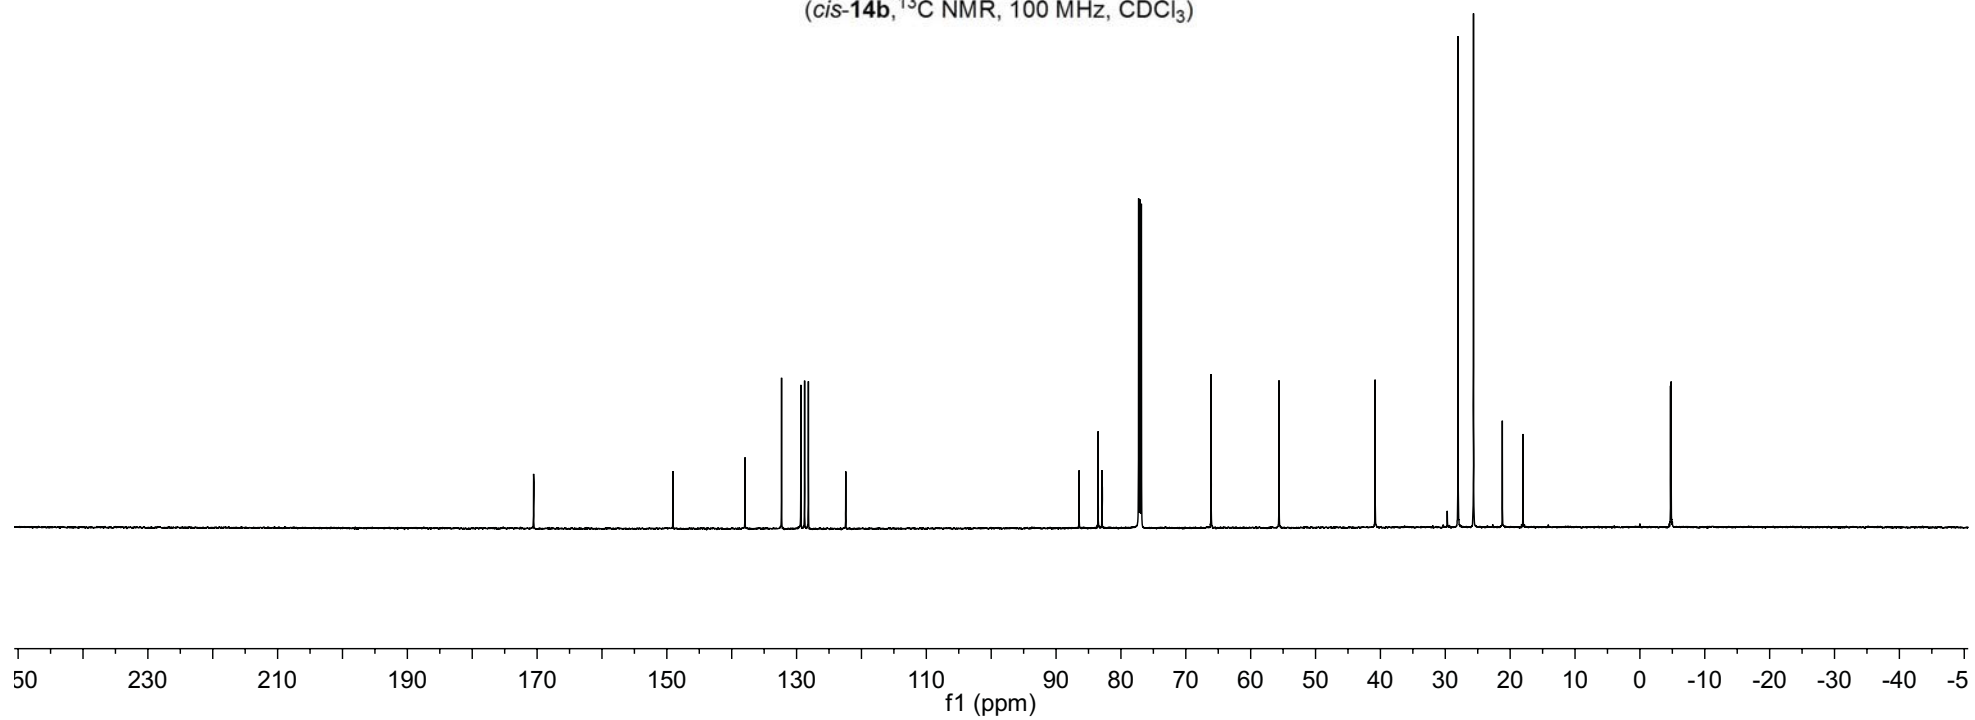

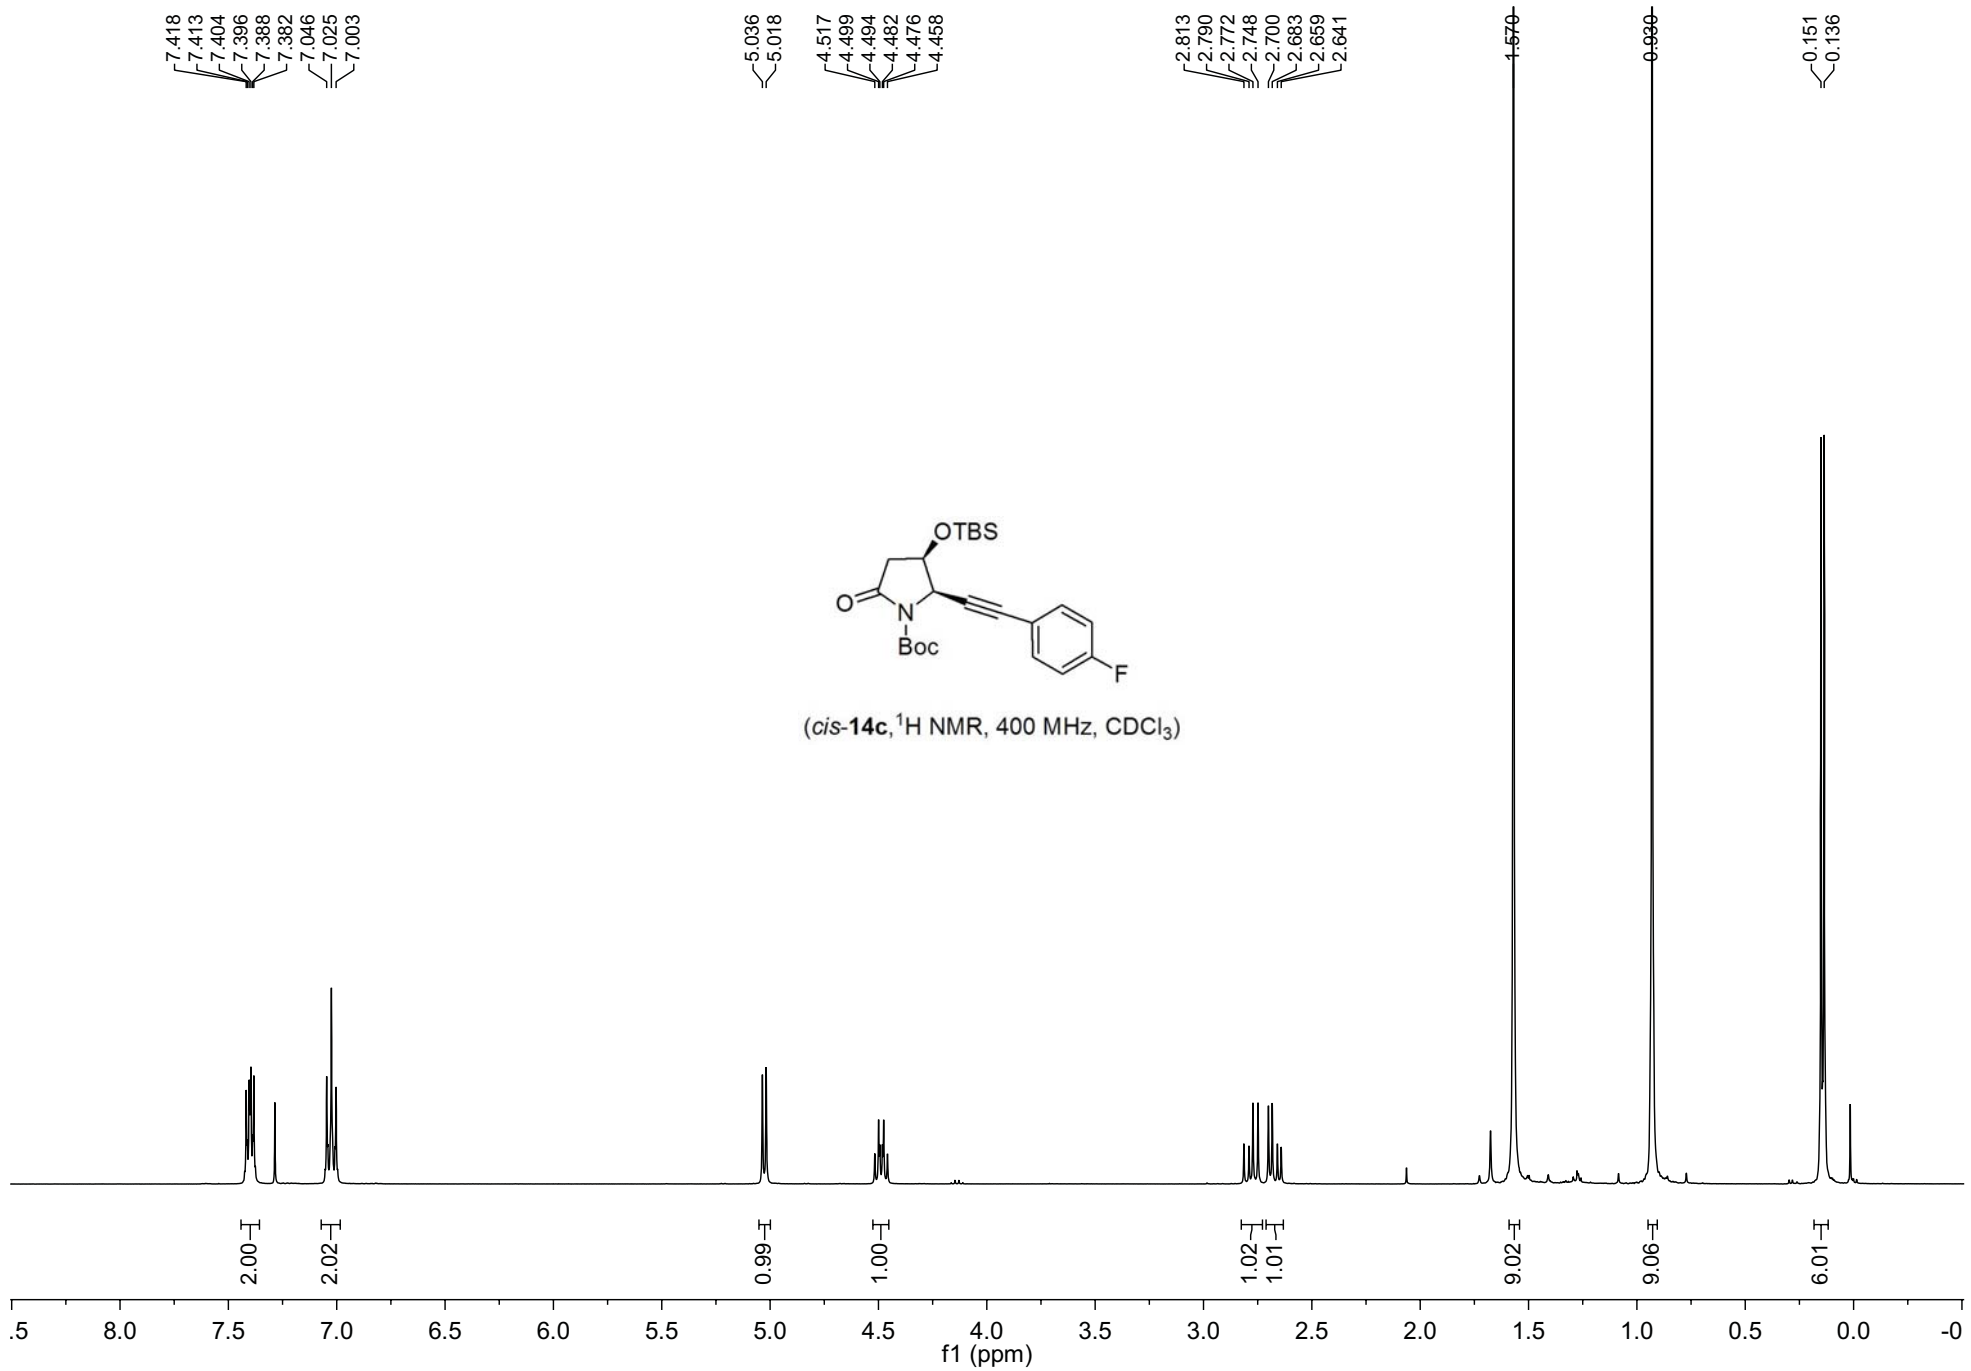



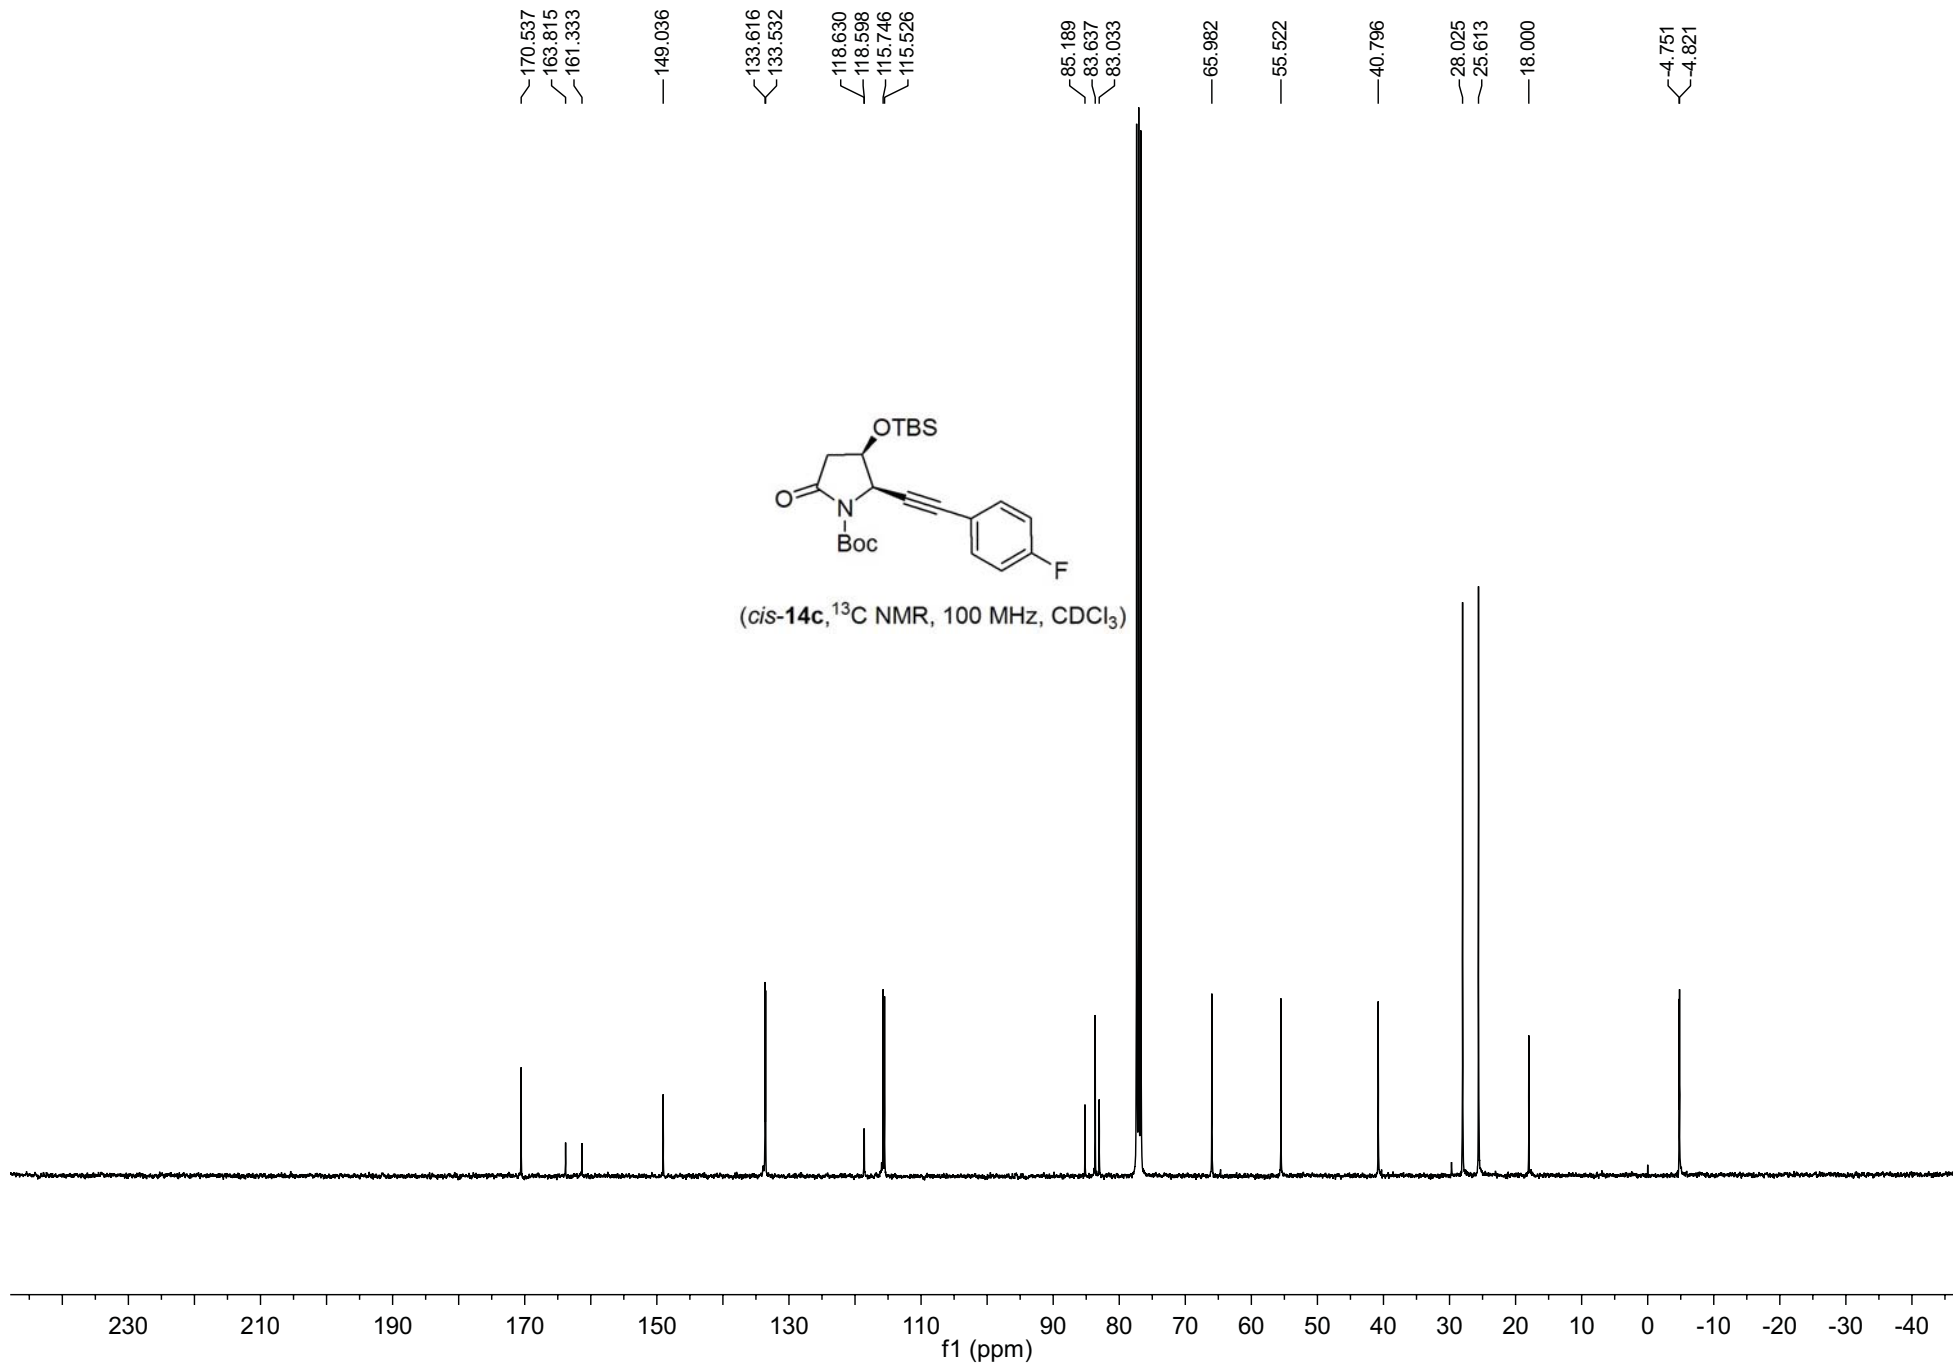

---110.551

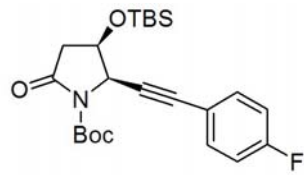

(*cis*-**14c**,  $^{19}\text{F}$  NMR, 376 MHz,  $\text{CDCl}_3$ )

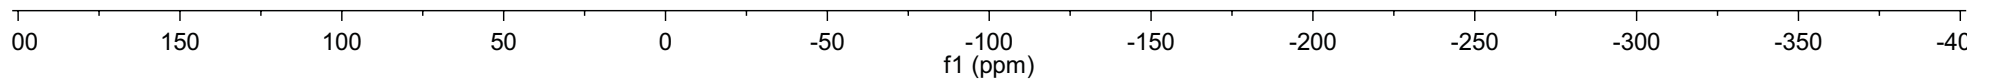

—7.285

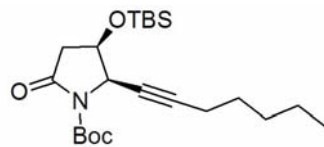

(*cis*-14d, <sup>1</sup>H NMR, 400 MHz, CDCl<sub>3</sub>)

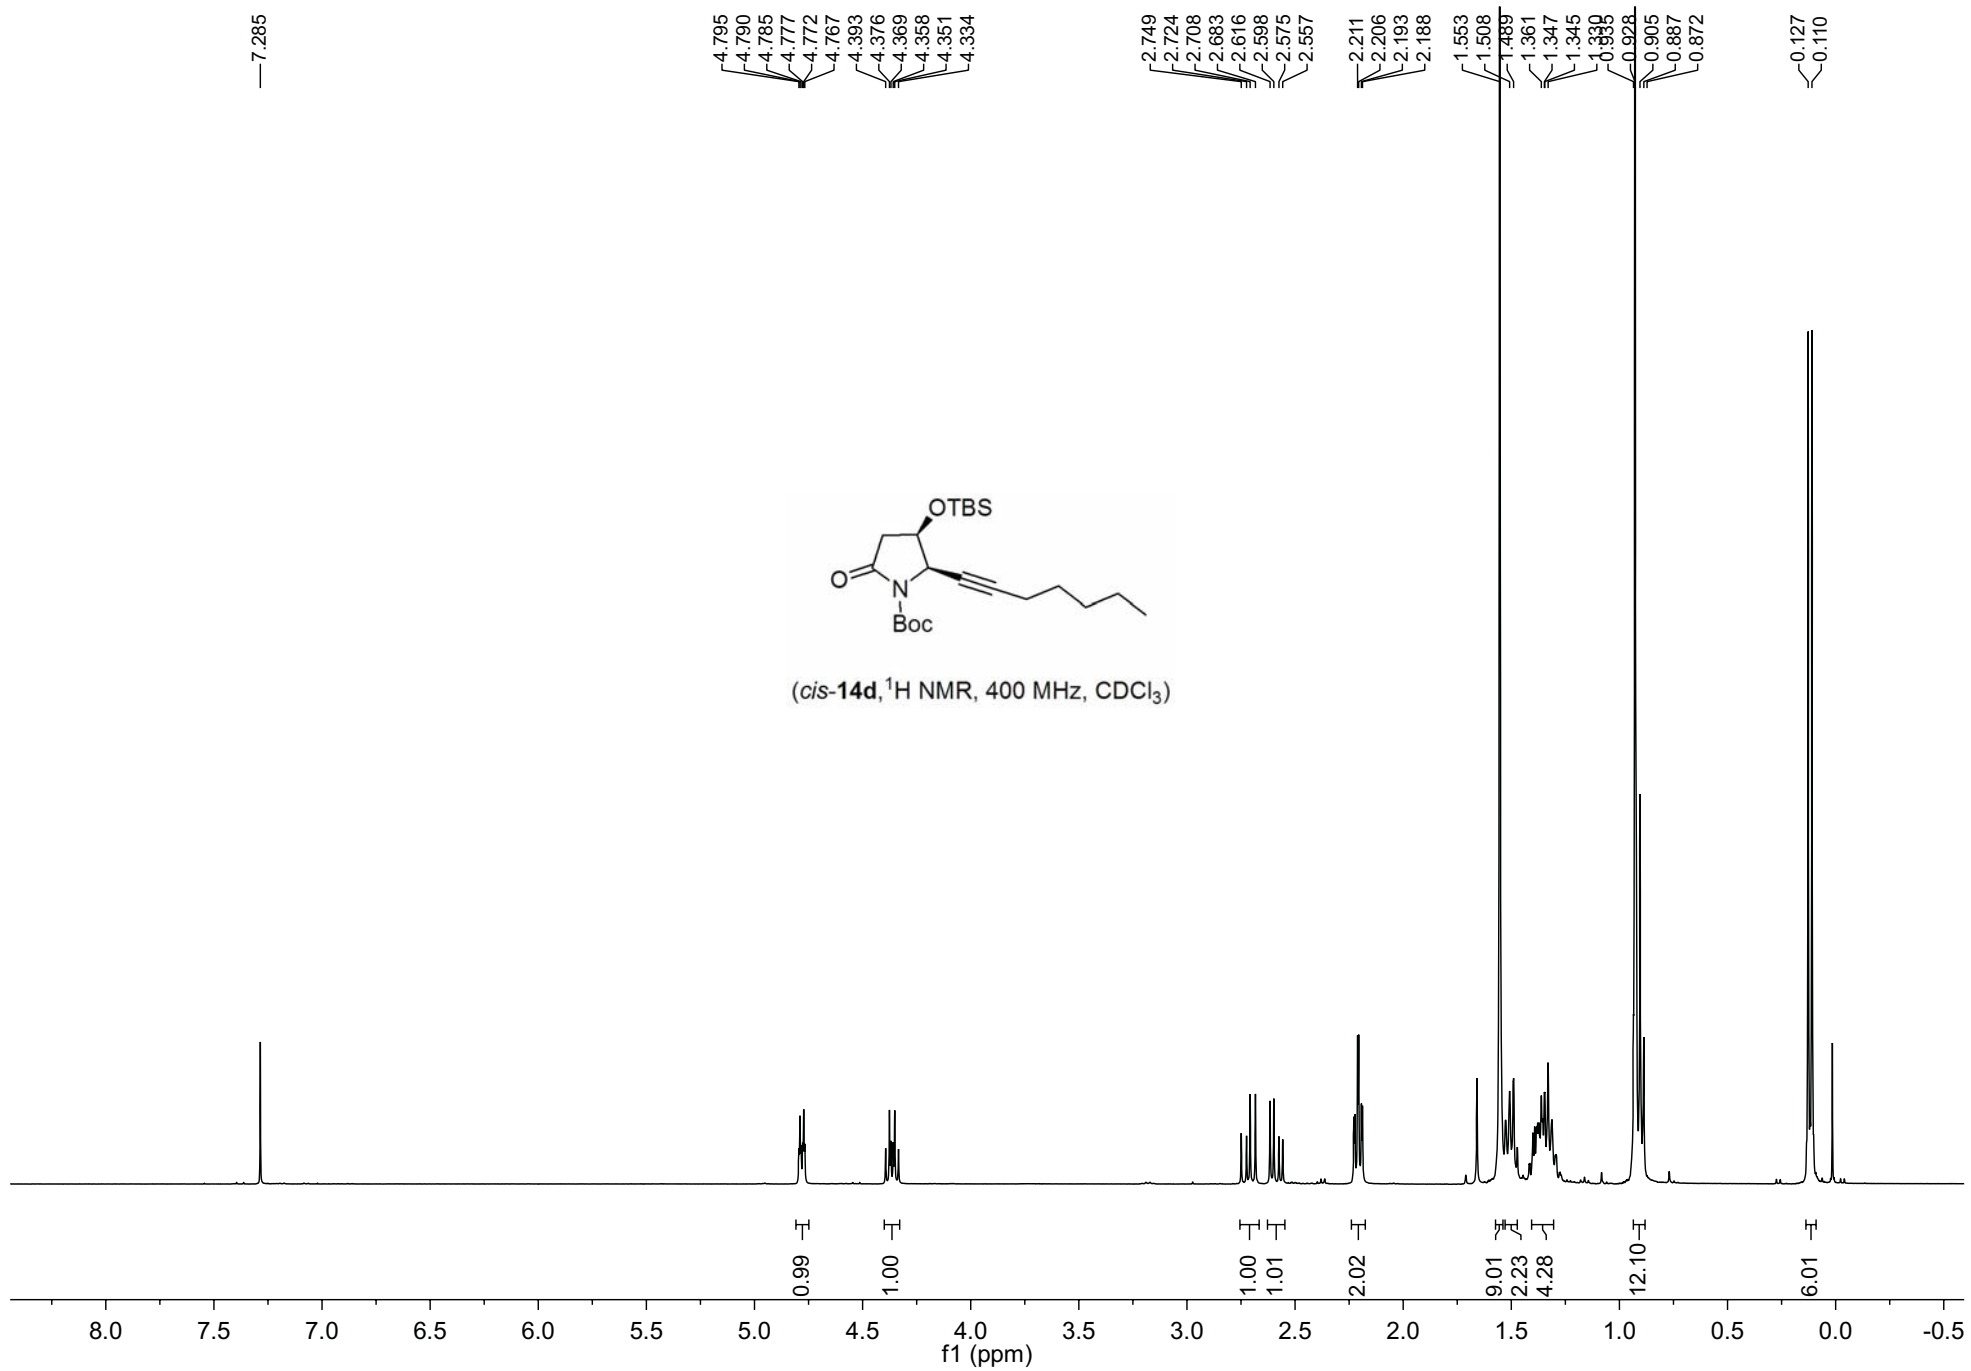

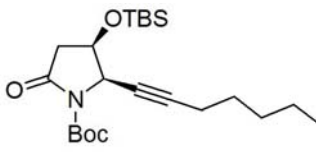

(*cis*-14d,  $^{13}\text{C}$  NMR, 100 MHz,  $\text{CDCl}_3$ )

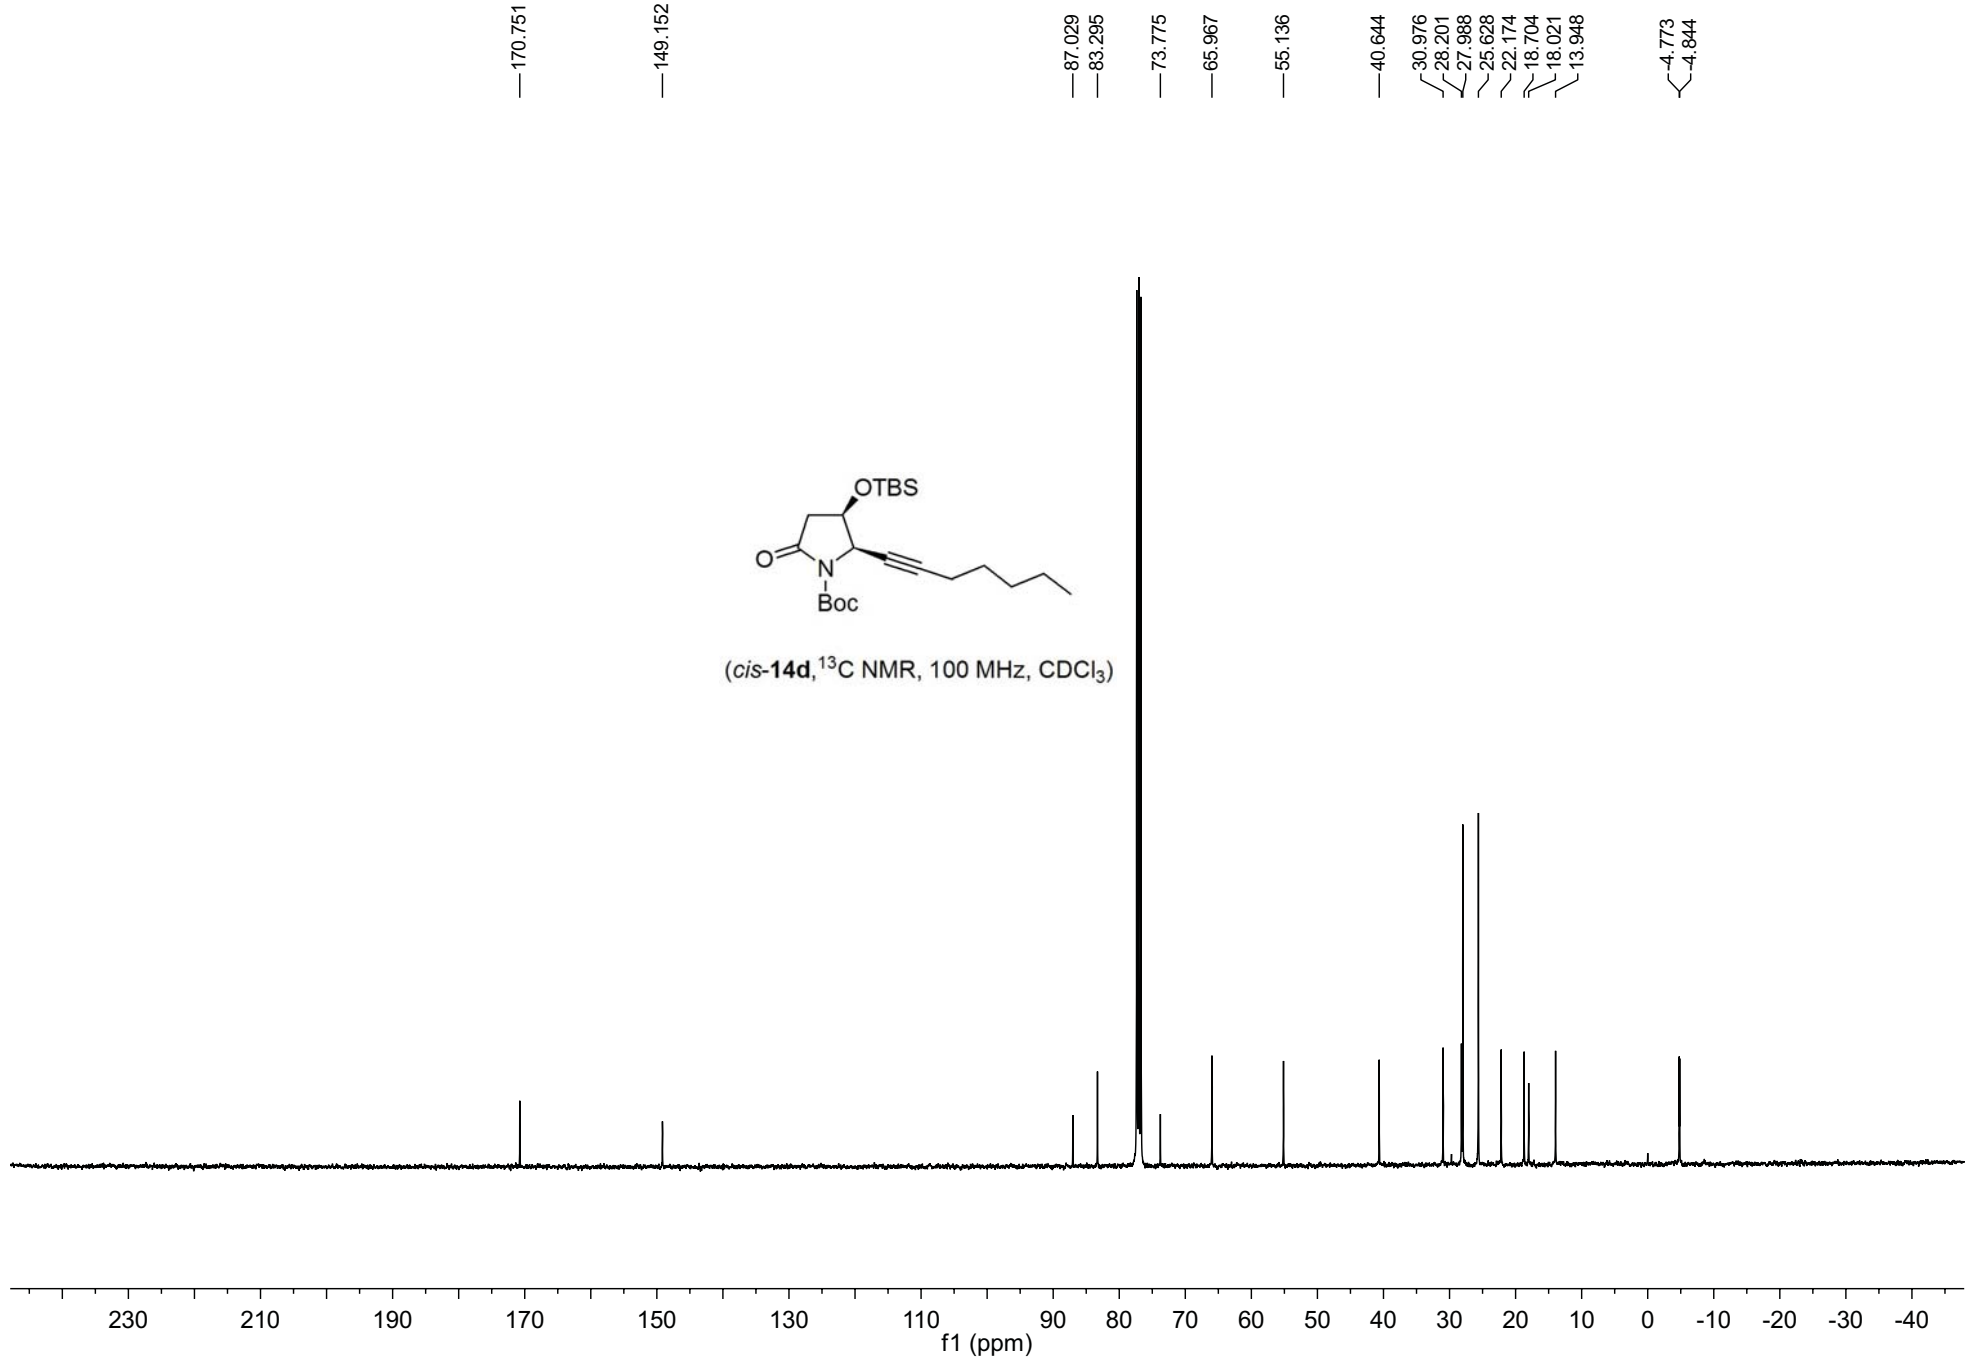

— 7.286

4.787  
4.769  
4.388  
4.370  
4.362  
4.352  
4.345  
4.327

2.740  
2.714  
2.699  
2.674  
2.599  
2.581  
2.558  
2.541

1.566

1.249

0.938

0.129

0.107

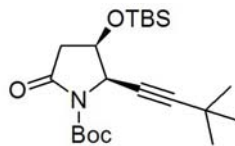

(*cis*-14e,  $^1\text{H}$  NMR, 400 MHz,  $\text{CDCl}_3$ )

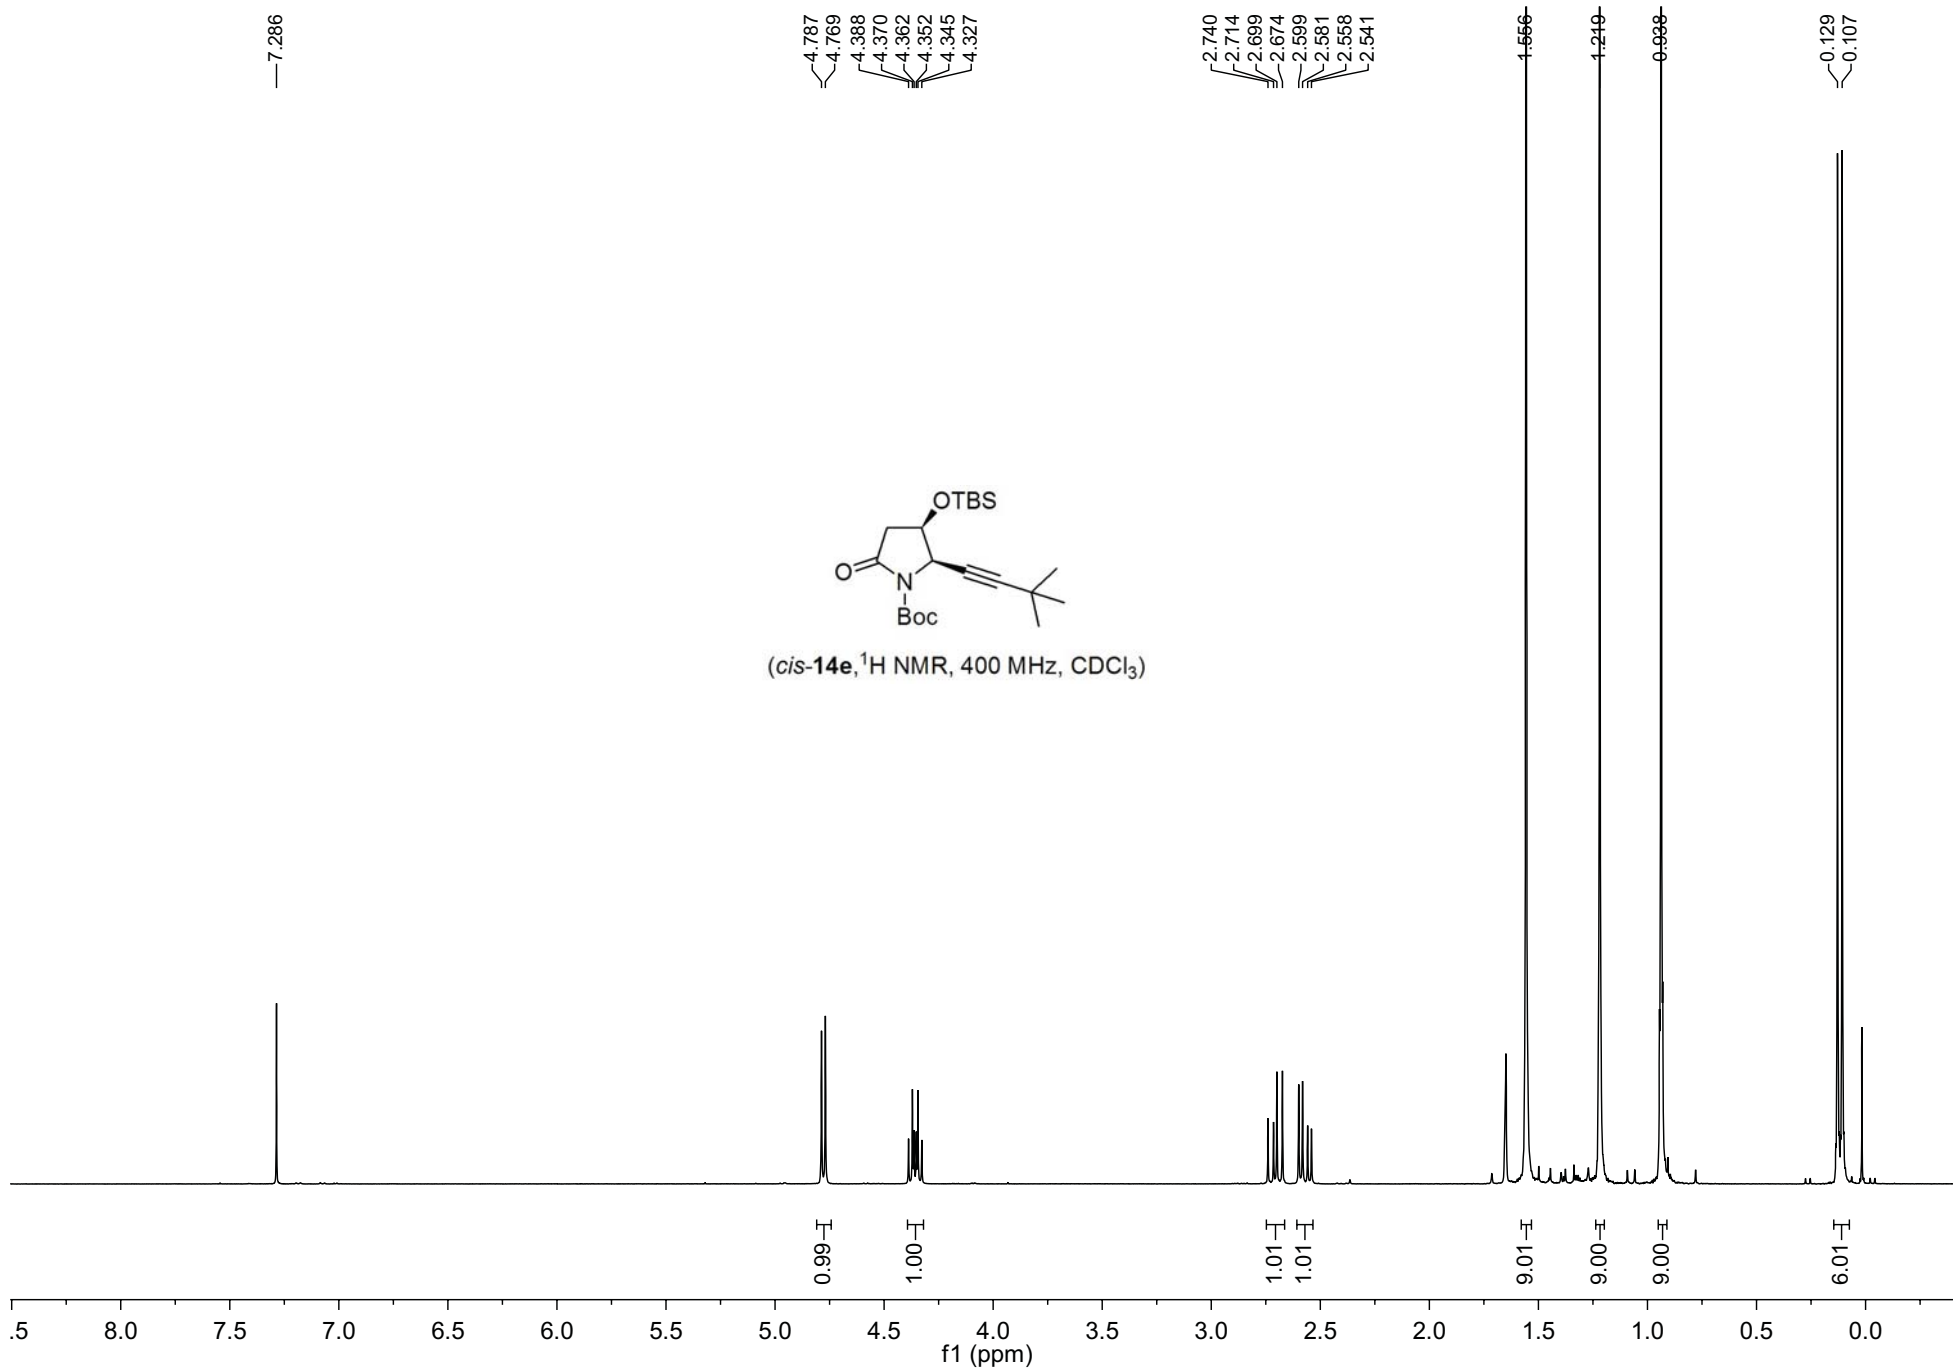

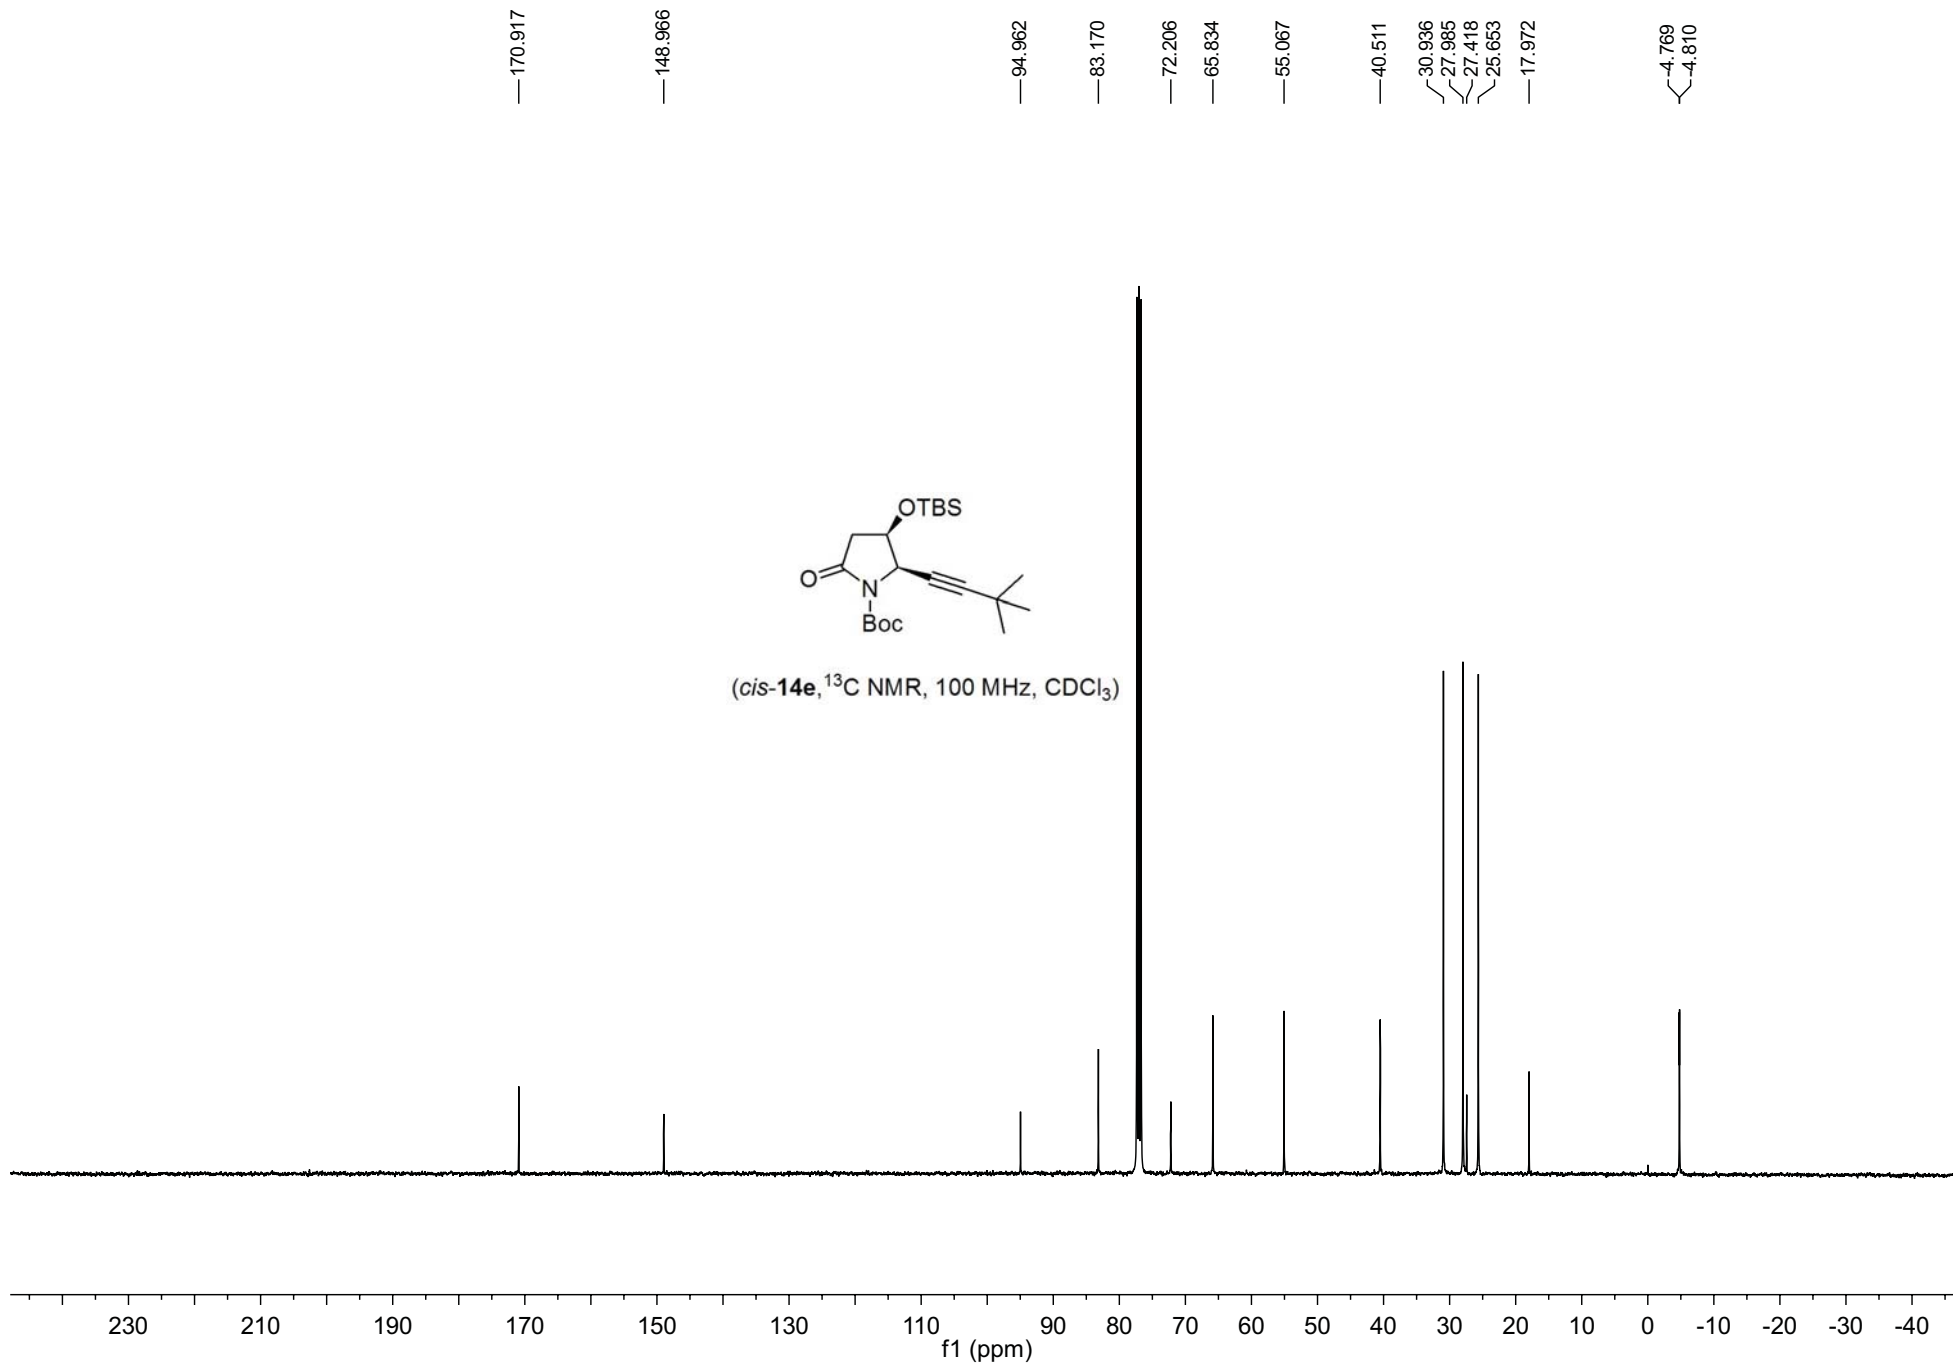

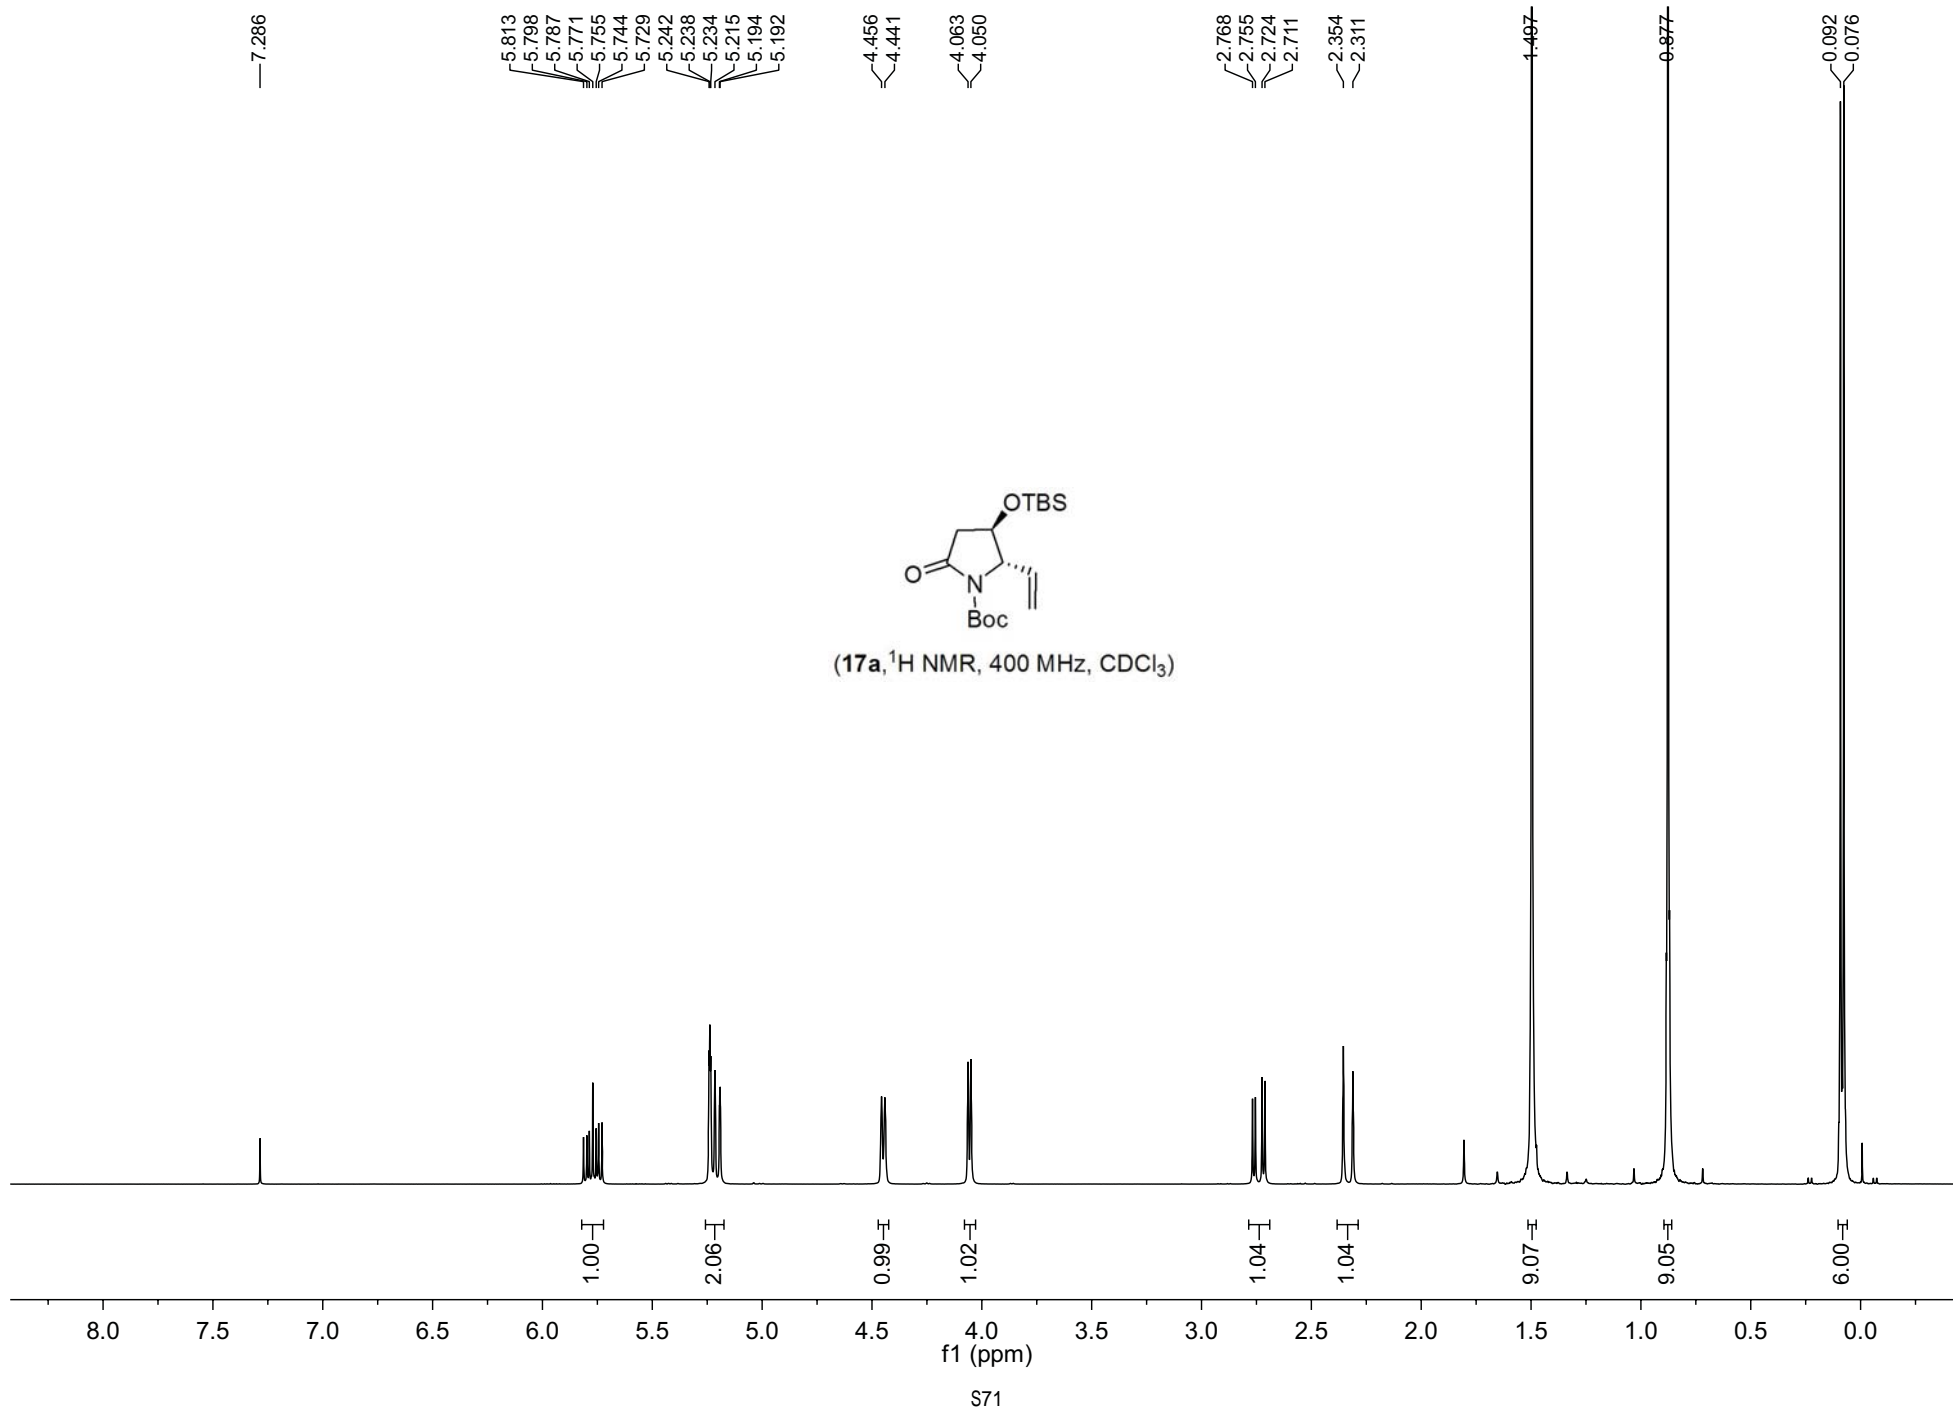

—172.592  
—149.799  
—133.949  
—116.574  
—82.867  
69.547  
69.403  
—41.056  
27.923  
25.642  
—17.974  
—4.799

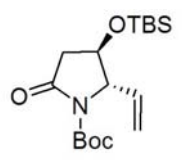

(17a, <sup>13</sup>C NMR, 100 MHz, CDCl<sub>3</sub>)

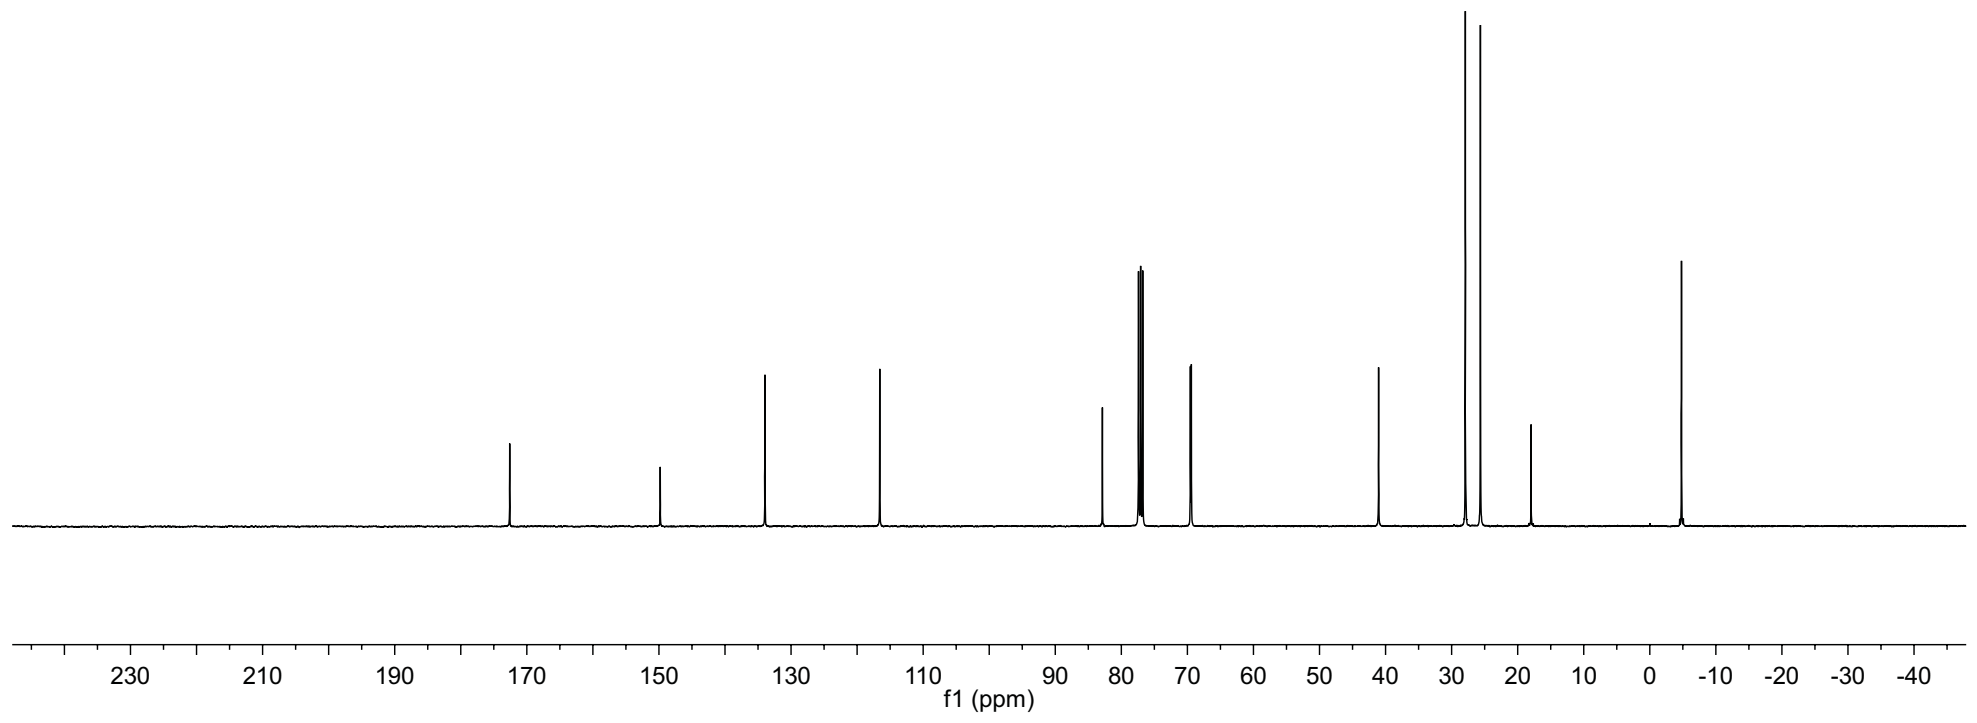



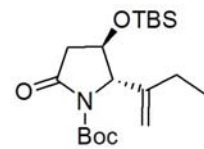

(**17b**,  $^1\text{H}$  NMR, 400 MHz,  $\text{CDCl}_3$ )

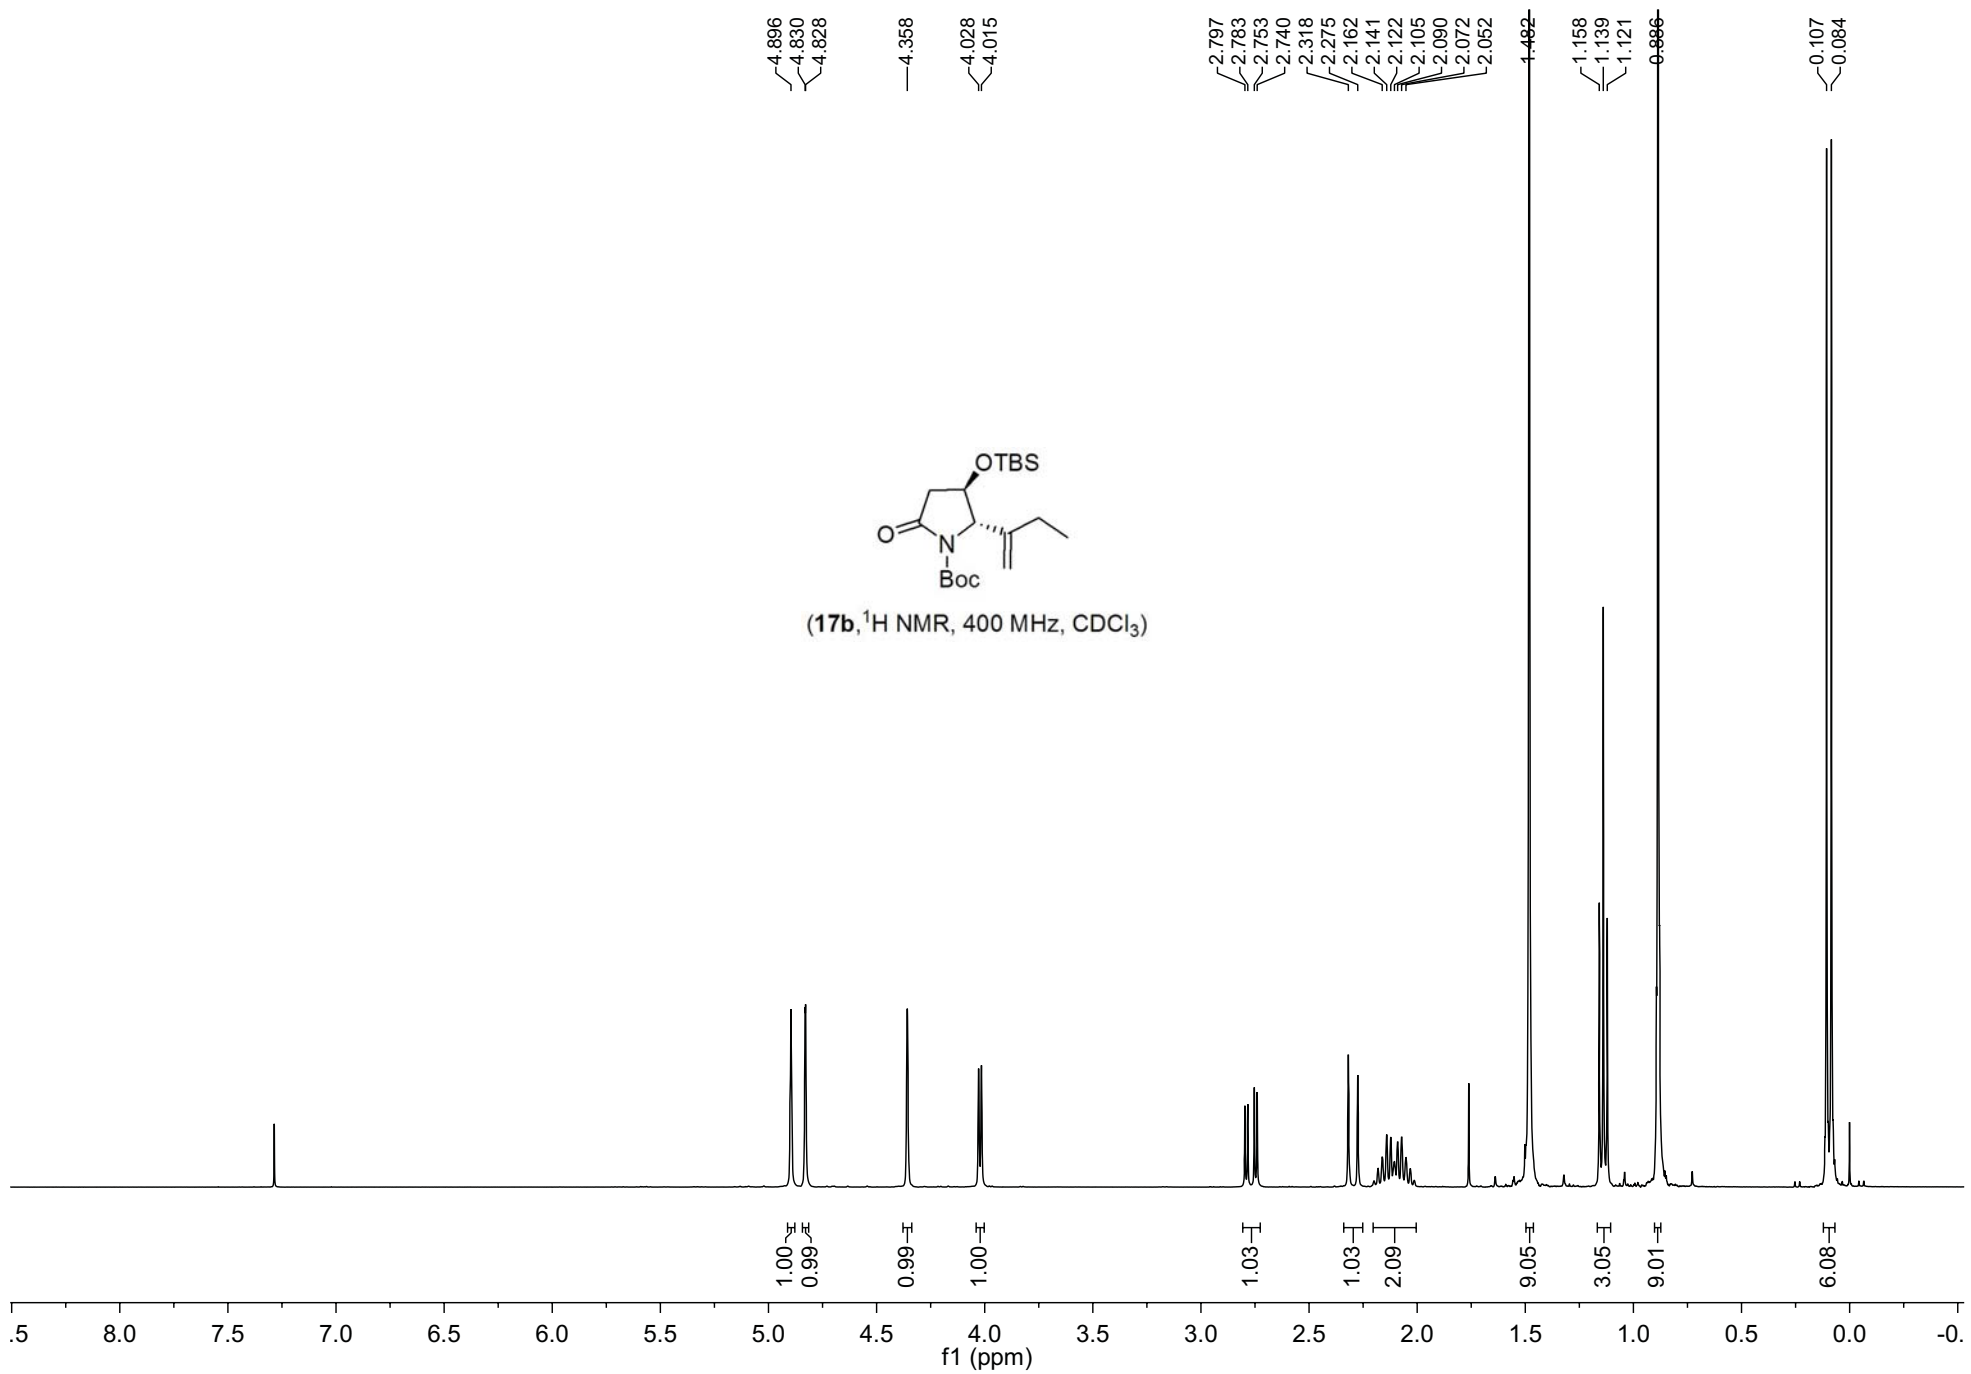

—173.113

—149.687  
—147.262

—108.071

—82.746

—71.462  
—68.566

—41.115

—27.907  
—26.516  
—25.634

—17.916  
—12.123

—4.694  
—4.733

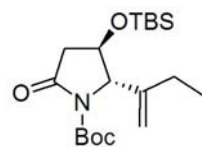

(**17b**,  $^{13}\text{C}$  NMR, 100 MHz,  $\text{CDCl}_3$ )

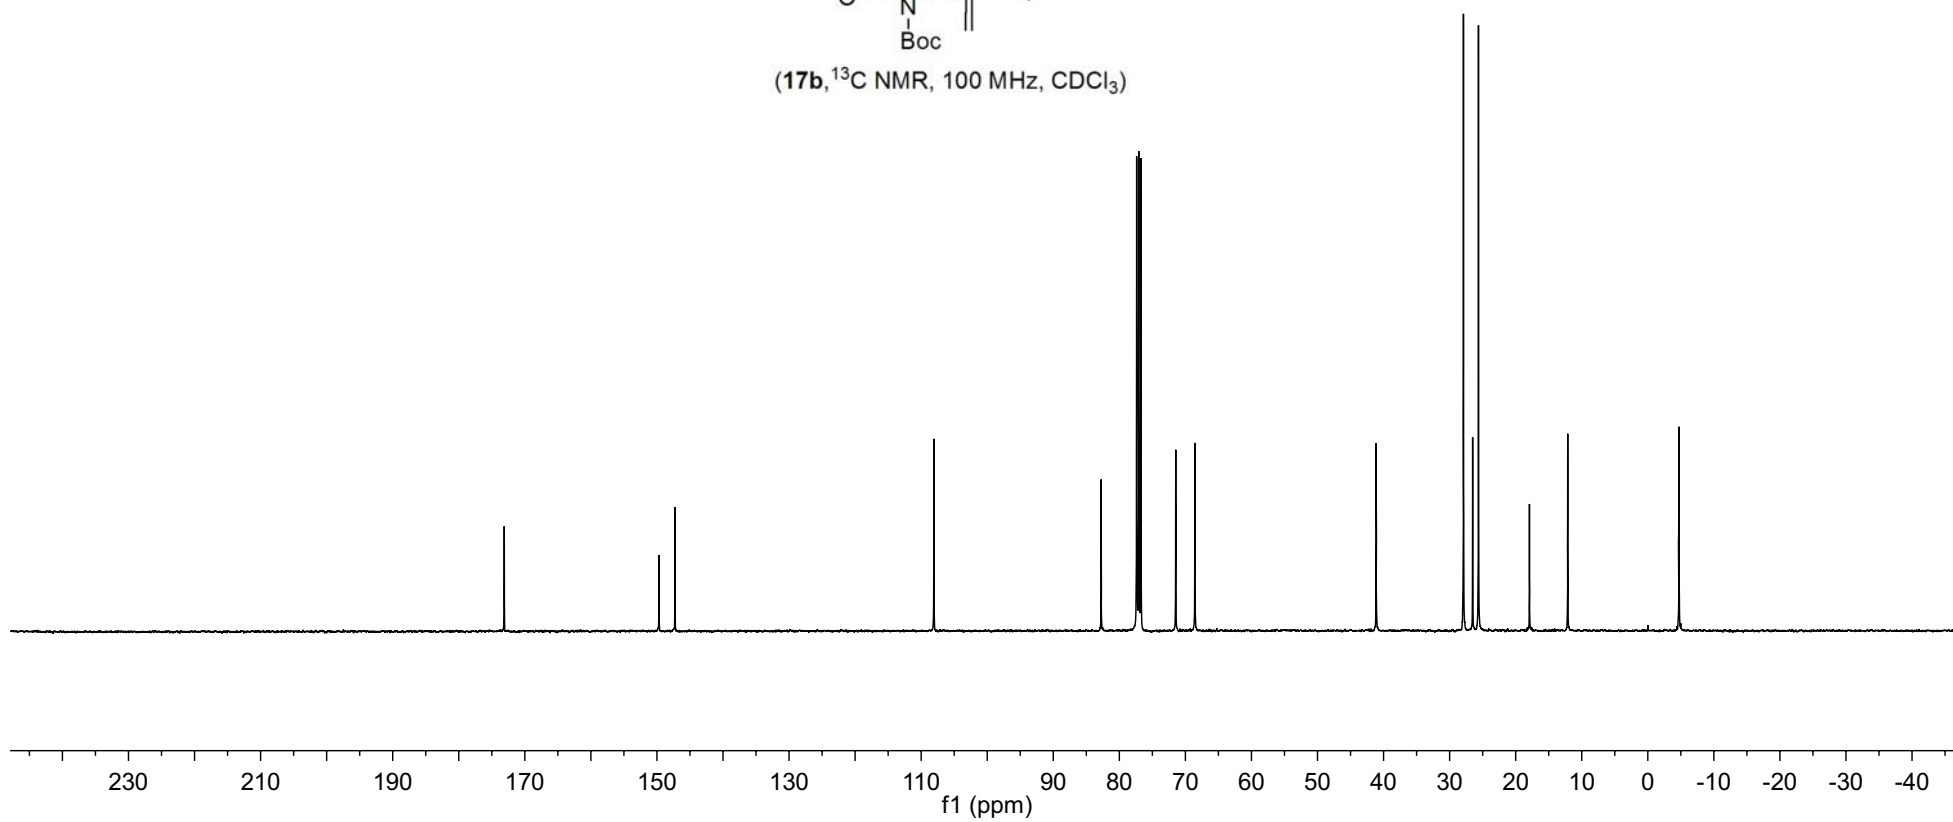

7.331  
7.323  
7.318  
7.295  
7.281  
7.270  
7.263  
7.258  
7.255  
7.249  
7.242  
7.228

4.549  
4.531  
4.512  
4.495  
4.486  
4.480  
4.468  
4.451

3.223  
3.205  
3.188  
3.170  
3.157  
3.135  
3.122  
2.659  
2.642  
2.617  
2.599  
2.468  
2.448  
2.426  
2.405

1.514

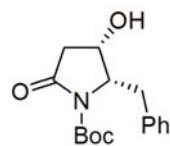

(18, <sup>1</sup>H NMR, 400 MHz, CDCl<sub>3</sub>)

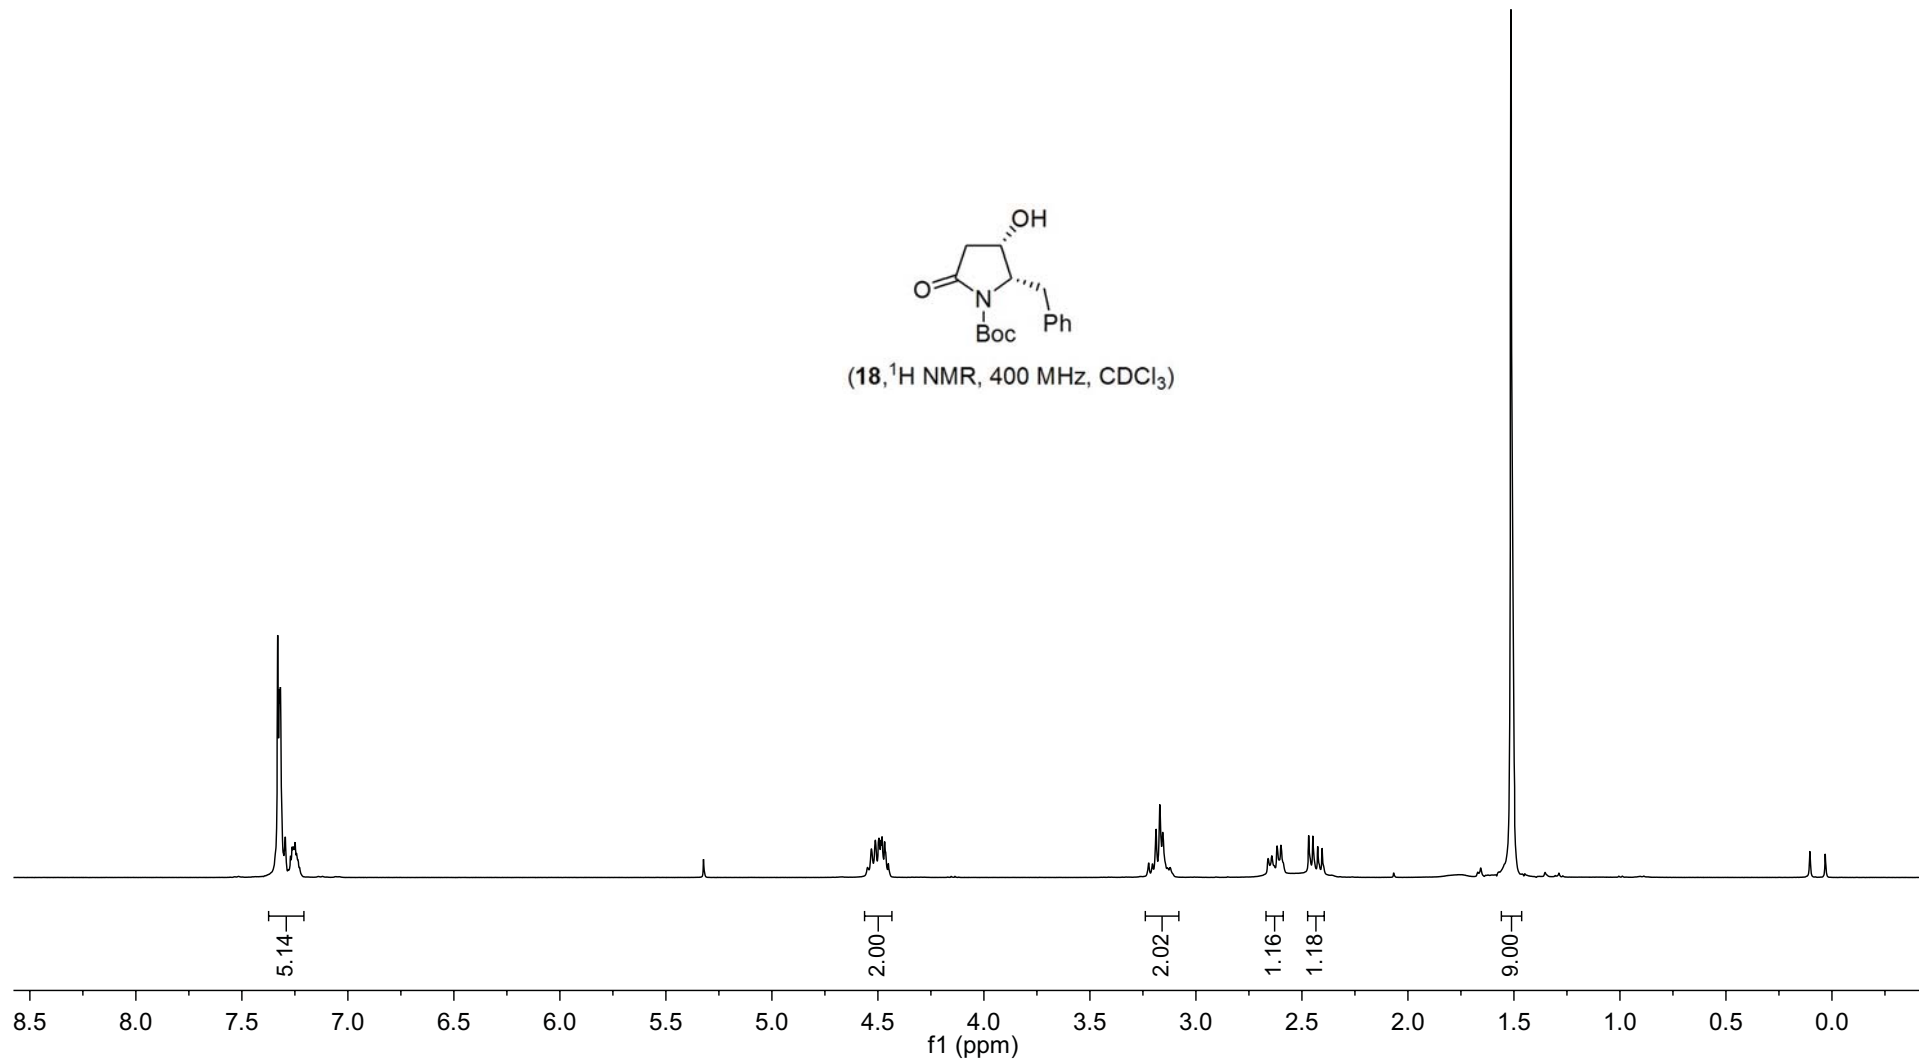

—171.800  
—149.765  
—137.780  
129.856  
128.623  
126.657  
—83.333  
—65.603  
—62.719  
—40.129  
—33.975  
—27.990

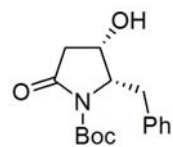

(18,  $^{13}\text{C}$  NMR, 100 MHz,  $\text{CDCl}_3$ )

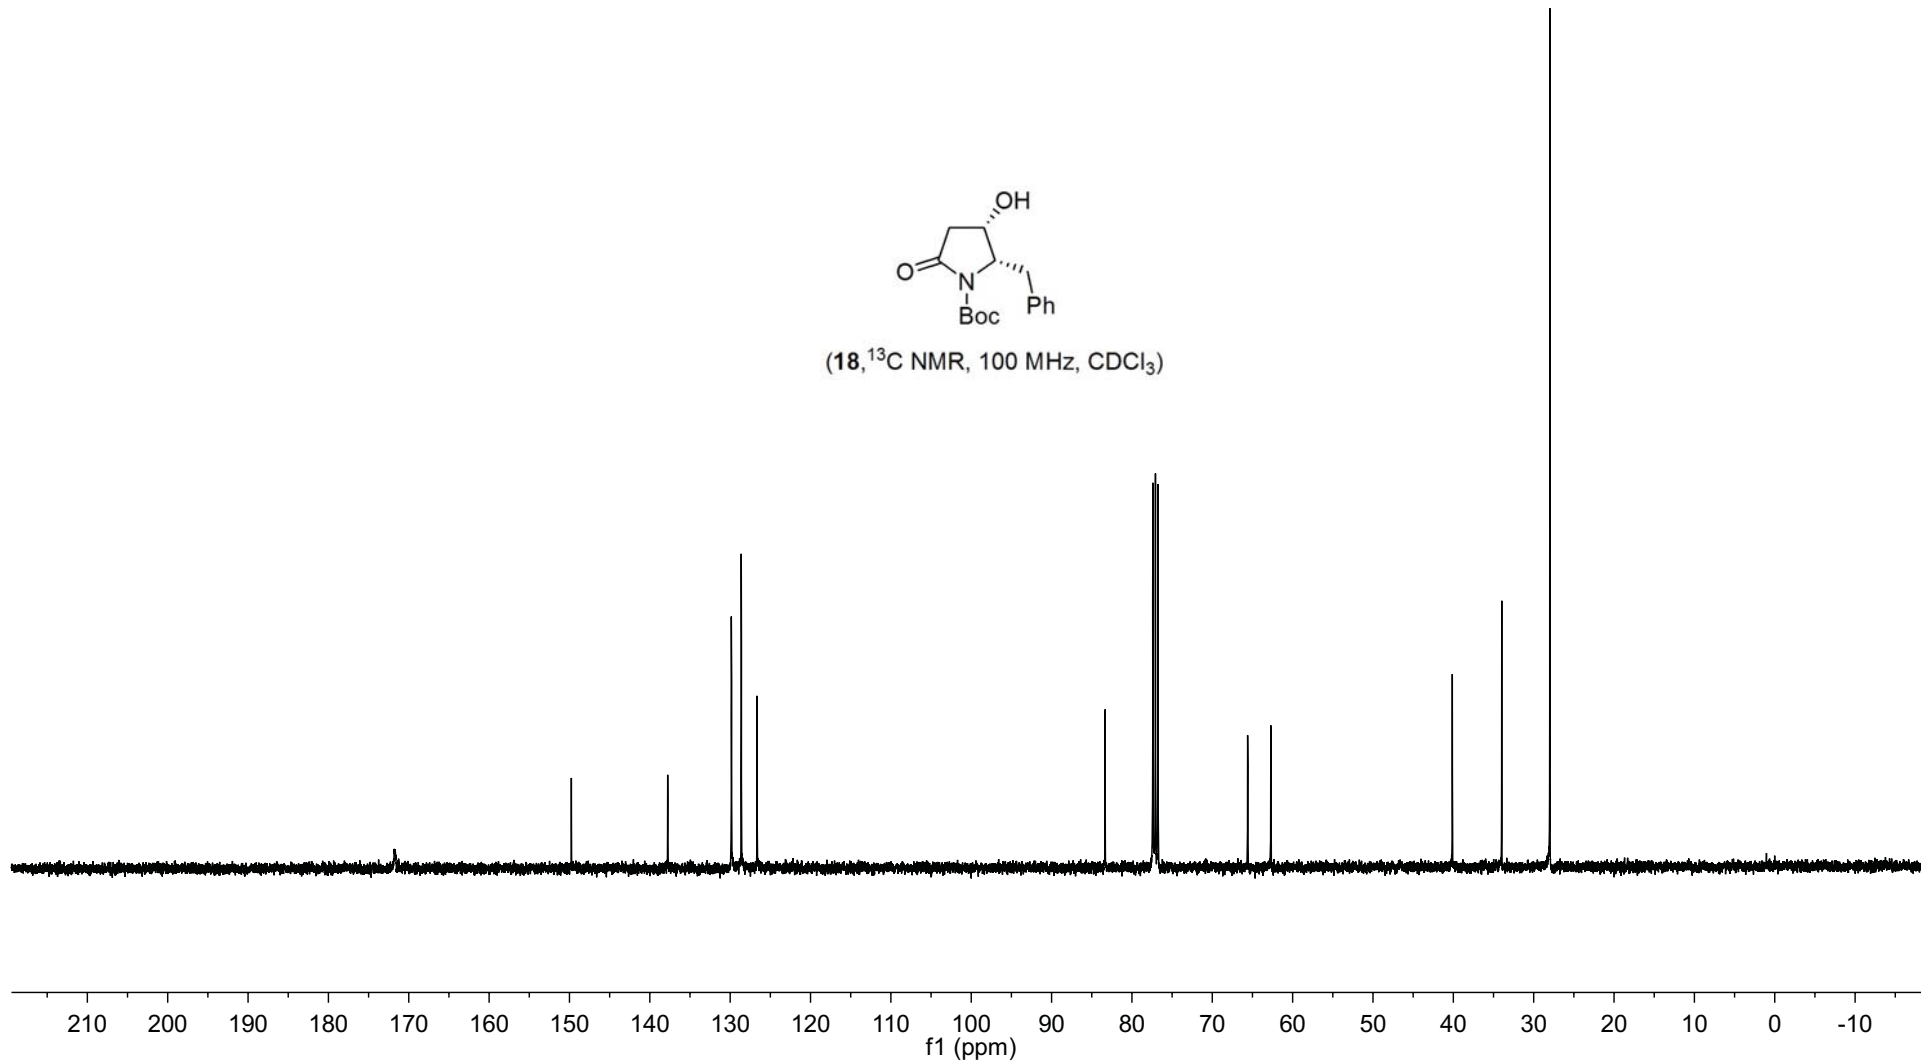

7.367  
7.348  
7.331  
7.285  
7.274  
7.254

5.779

4.473

3.940  
3.927  
3.917  
3.914  
3.904  
3.891

3.089  
3.075  
3.055  
3.040

2.988  
2.976  
2.892  
2.870  
2.858

2.835  
2.710  
2.695  
2.667  
2.652  
2.444  
2.438  
2.401  
2.395

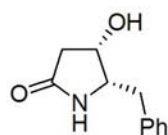

(5, <sup>1</sup>H NMR, 400 MHz, CDCl<sub>3</sub>)

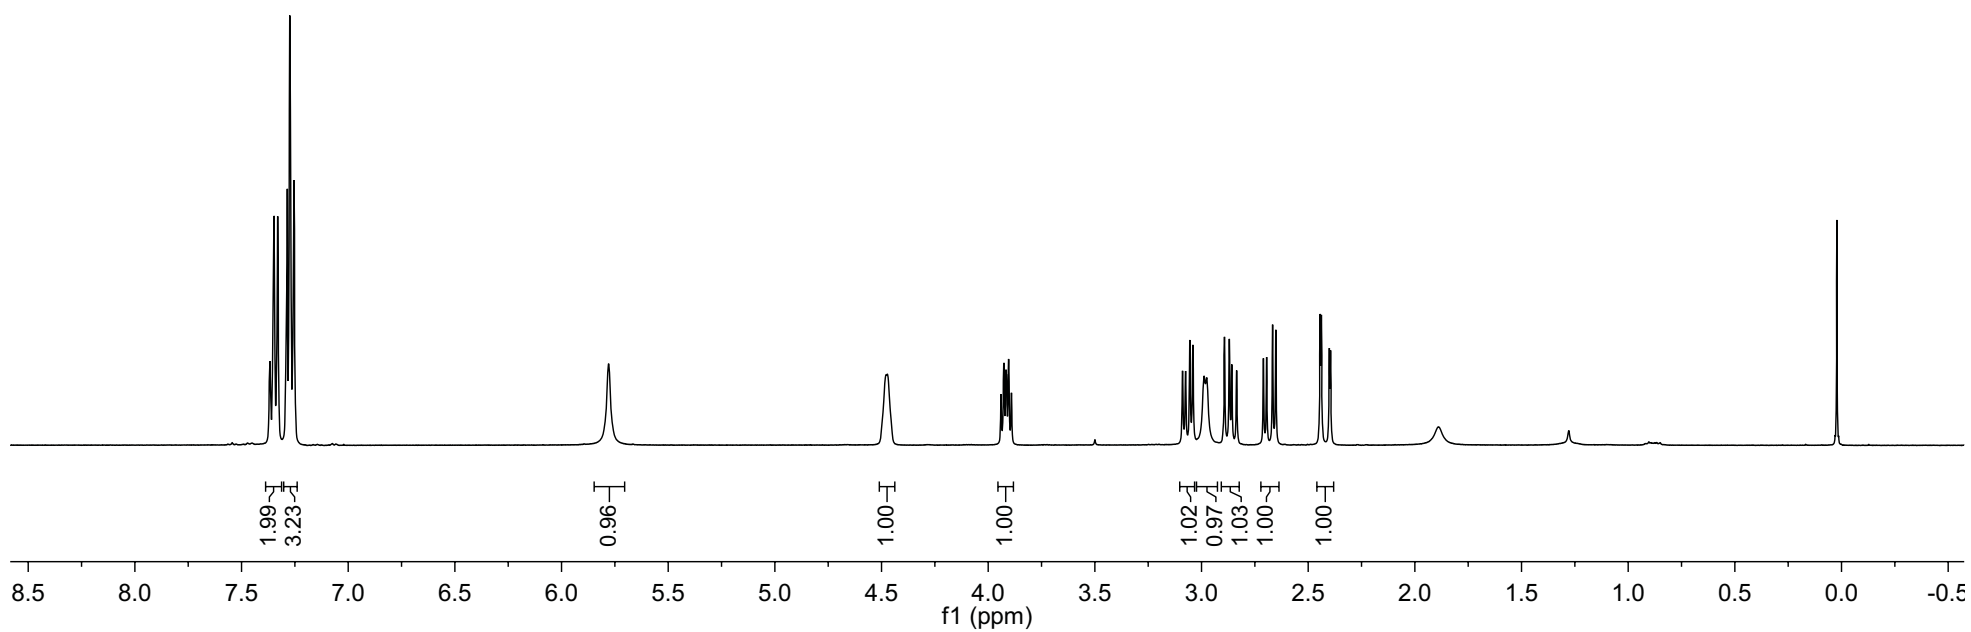

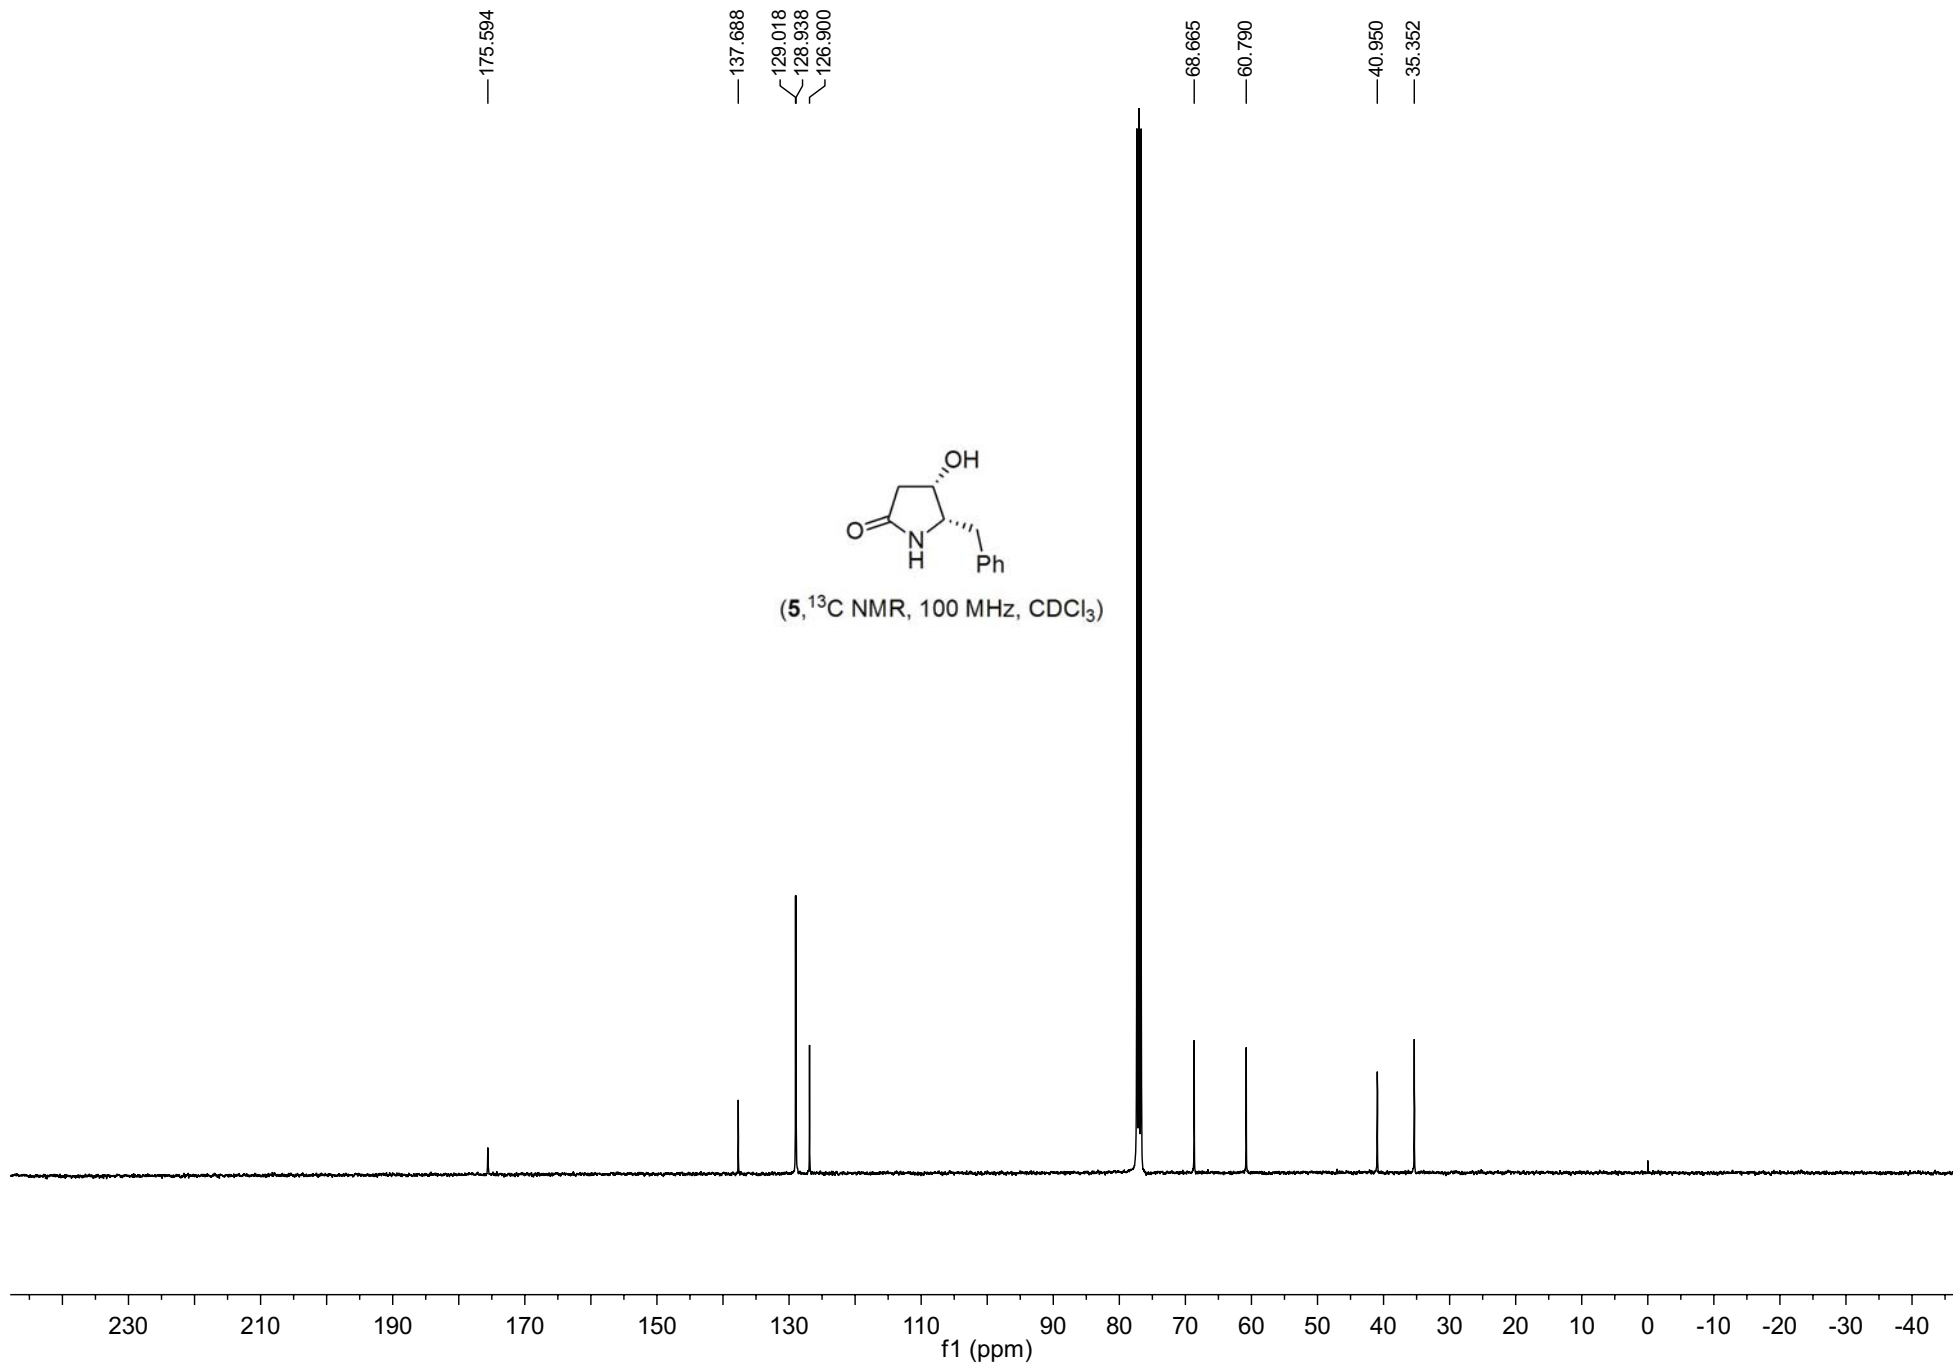

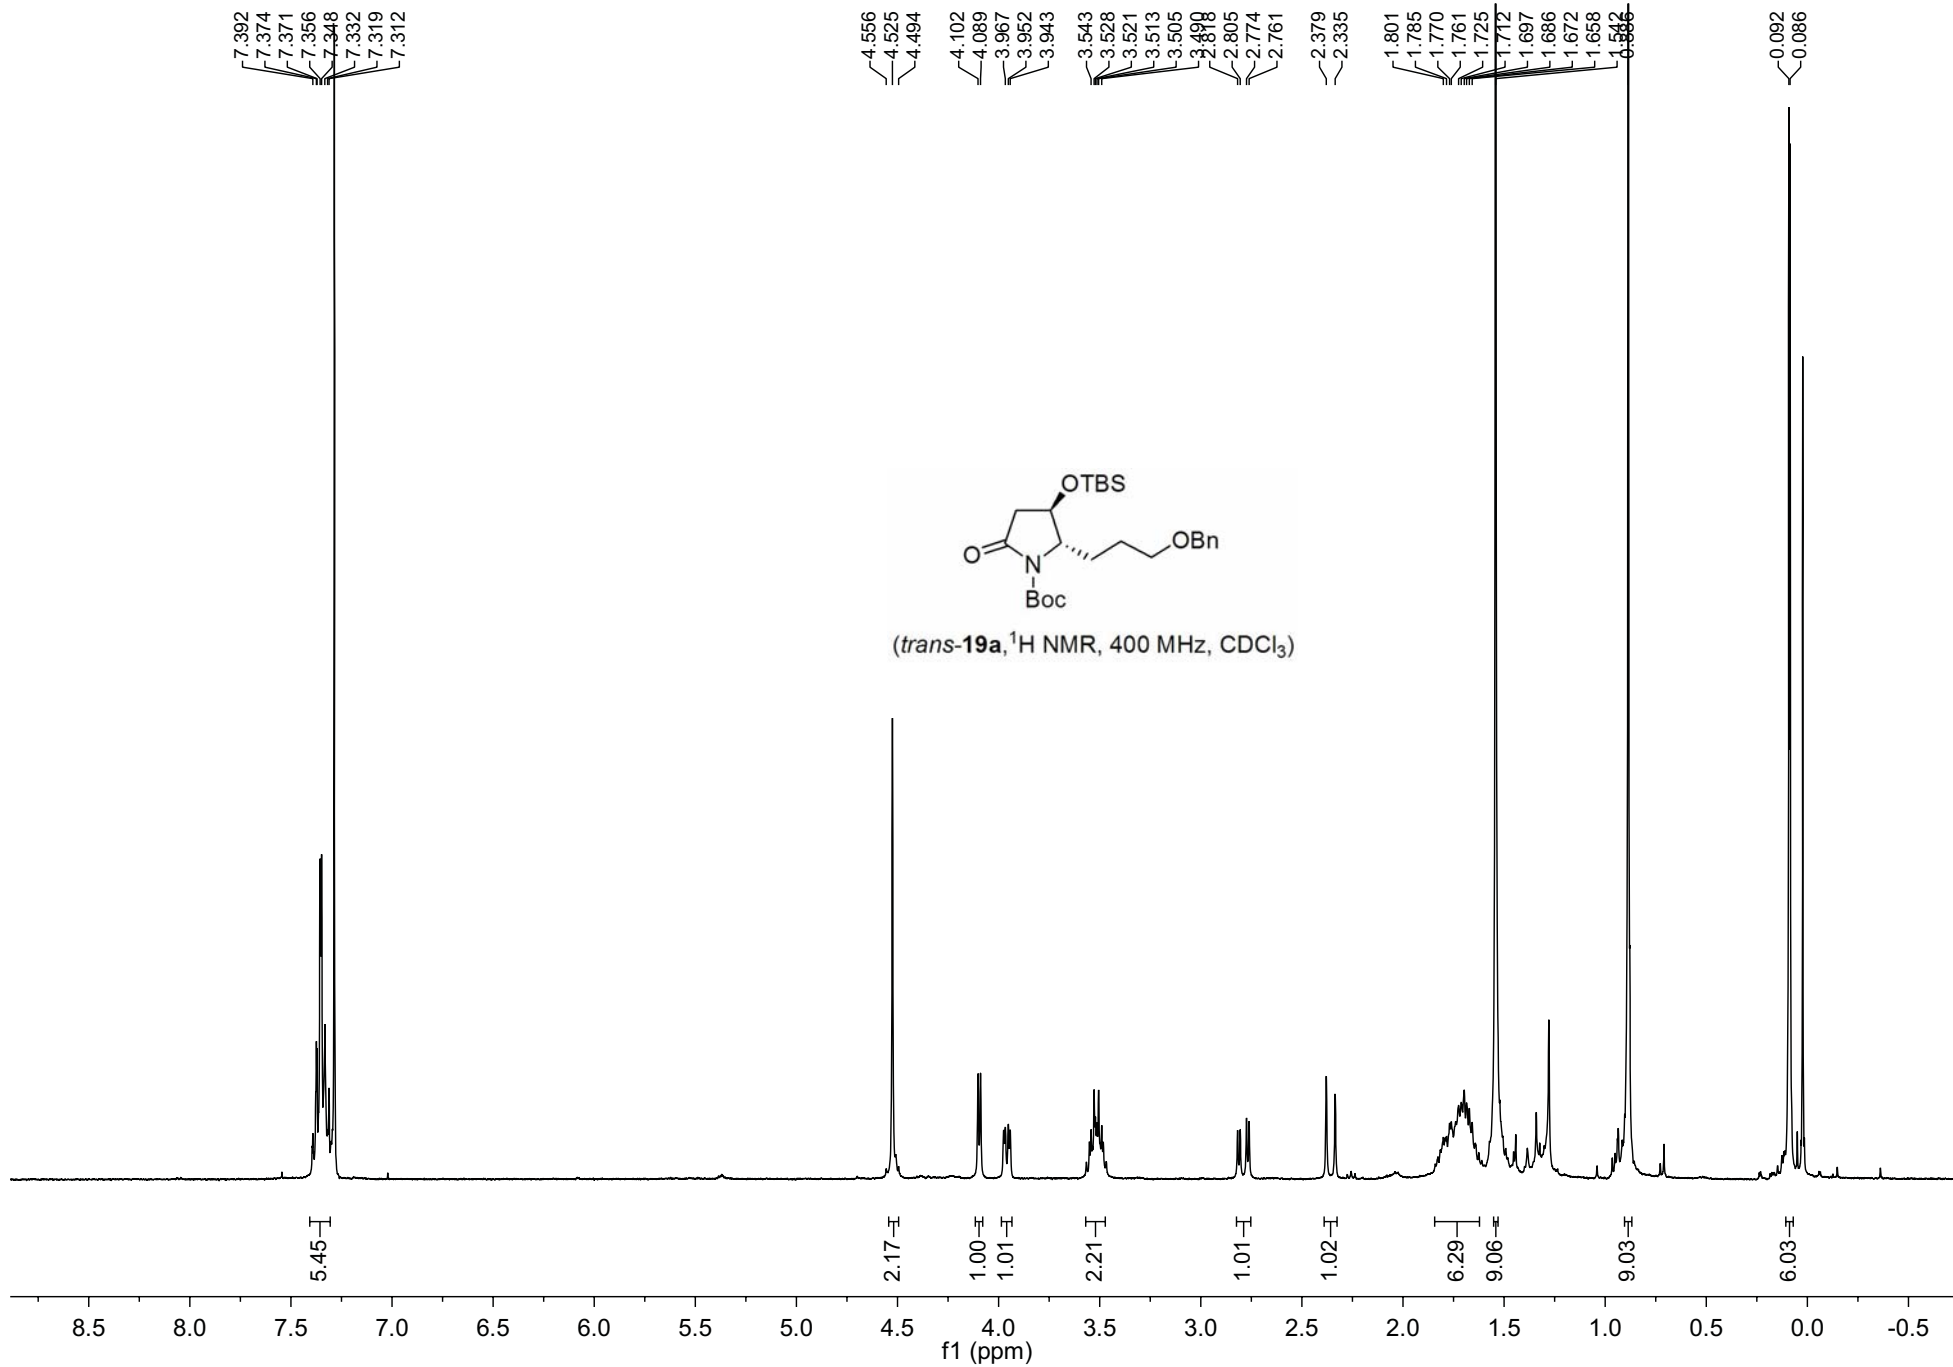

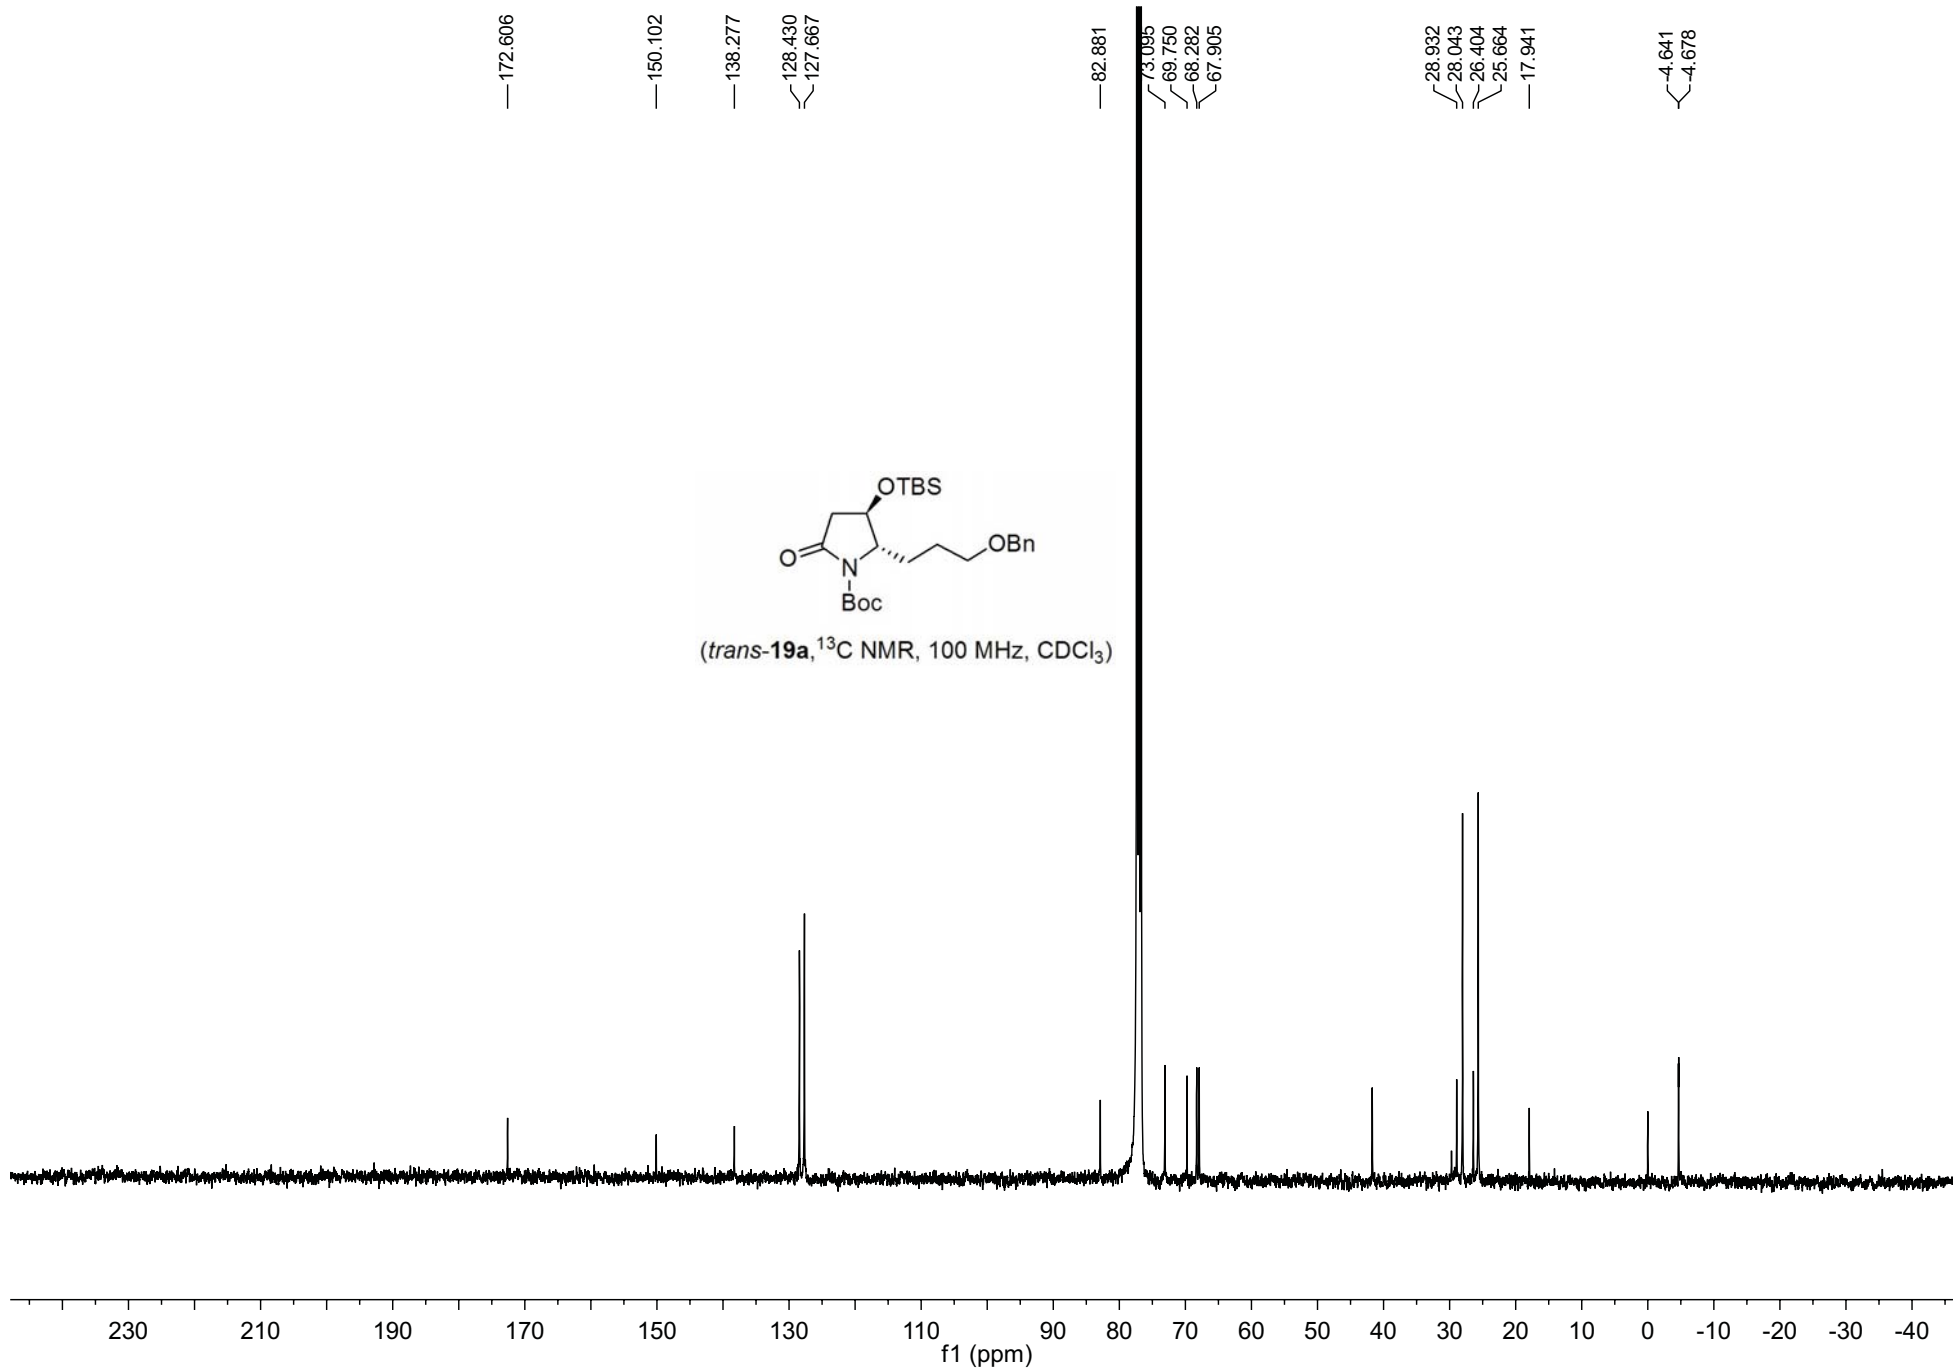



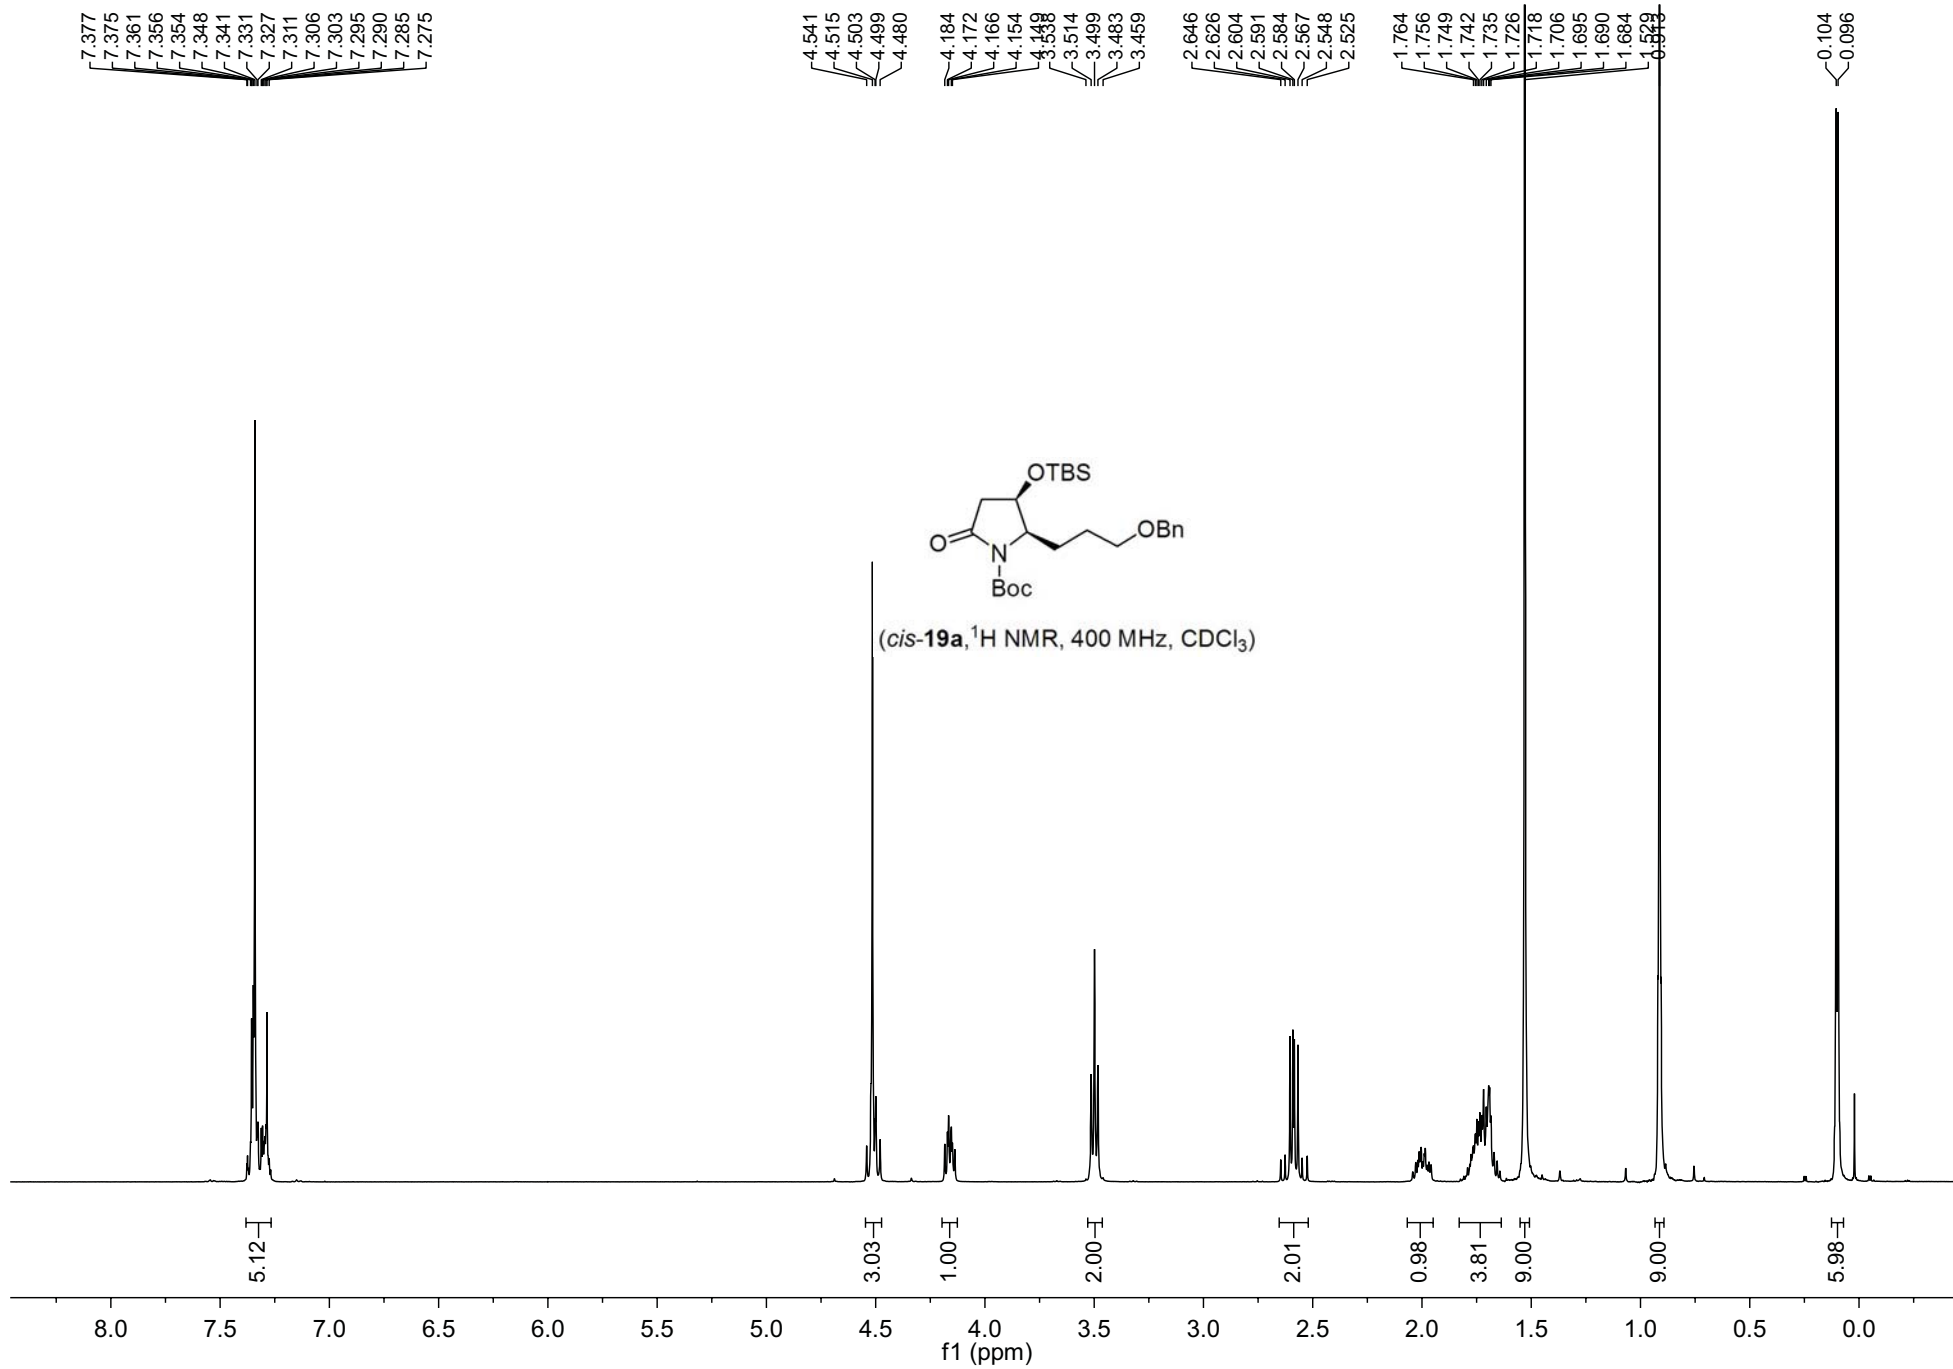

— 171.292  
— 149.845  
— 138.595  
128.320  
127.516  
127.470  
— 83.063  
72.791  
70.231  
66.400  
61.409  
— 40.798  
28.003  
26.658  
25.713  
25.510  
17.976  
— 4.694  
— 5.001

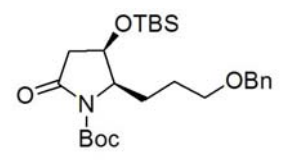

(*cis*-**19a**,  $^{13}\text{C}$  NMR, 100 MHz,  $\text{CDCl}_3$ )

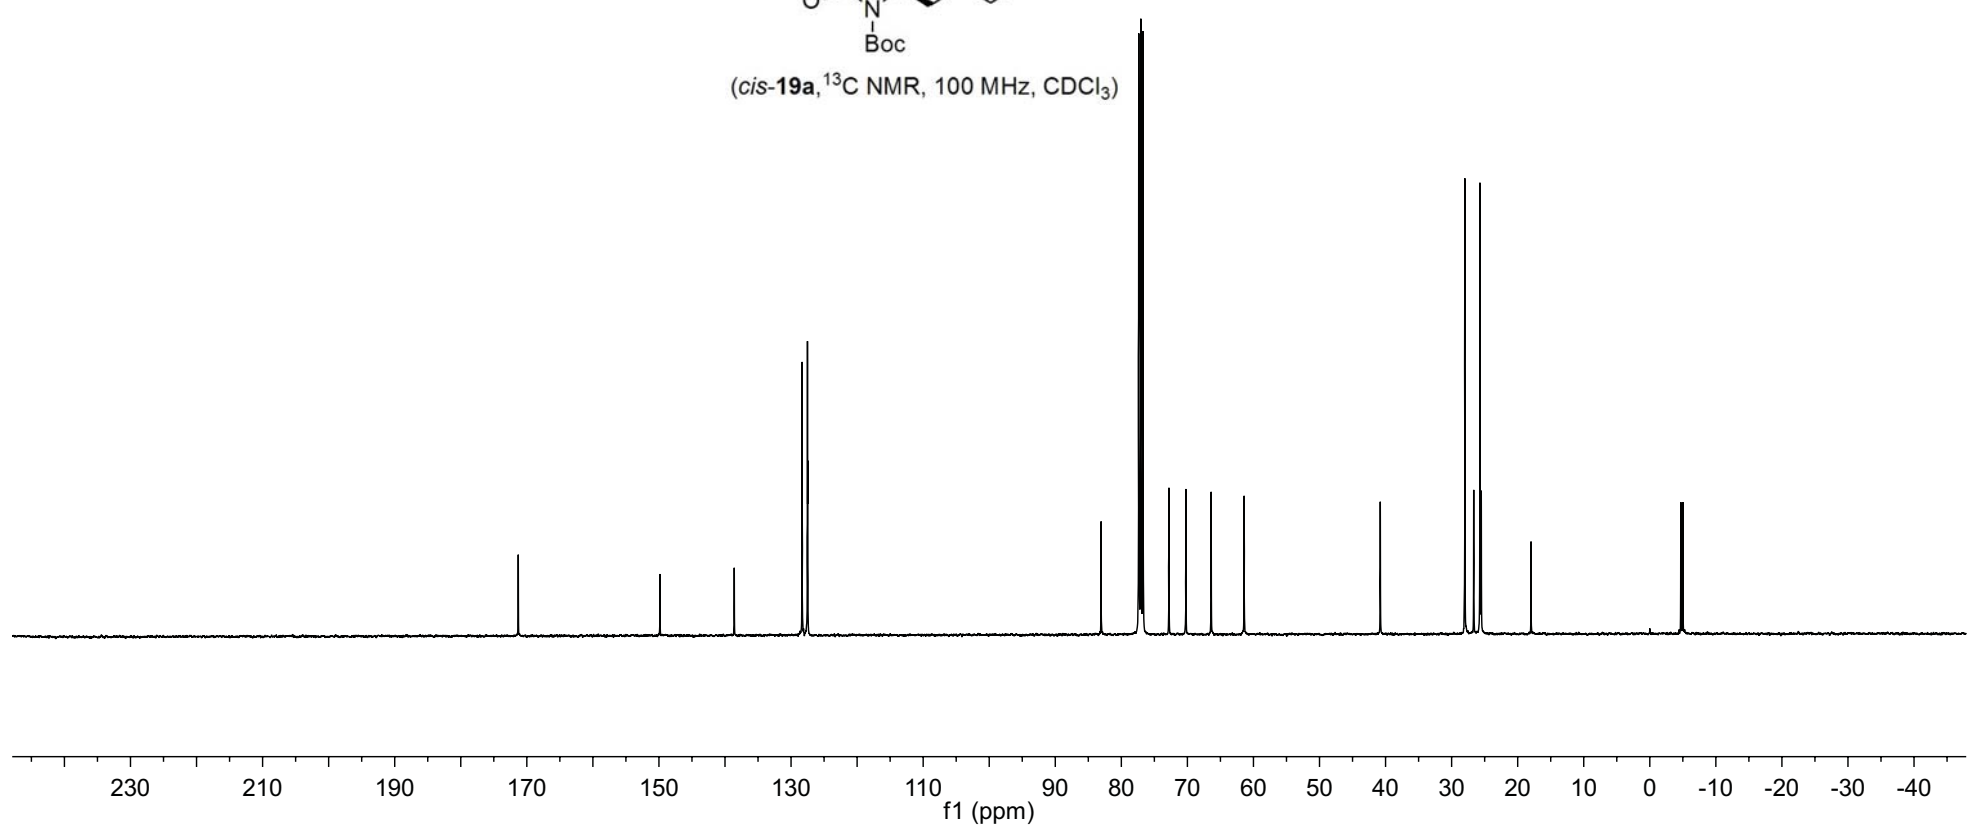

7.288  
7.275  
7.263  
7.258  
7.247  
7.227  
7.223  
7.216  
7.205  
7.198

4.452  
4.431  
4.425  
4.410

3.999  
3.991  
3.863  
3.856  
3.848

3.424  
3.420  
3.414  
3.409  
3.404  
3.399  
3.384  
3.380  
2.681  
2.660  
2.652

2.274  
2.244

1.637  
1.632  
1.619  
1.612  
1.605  
1.596  
1.587  
1.563  
1.457  
1.353  
1.347  
1.360

0.009  
-0.000

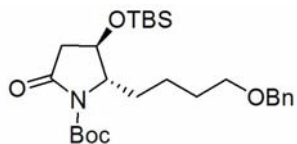

(*trans*-**19d**,  $^1\text{H}$  NMR, 400 MHz,  $\text{CDCl}_3$ )

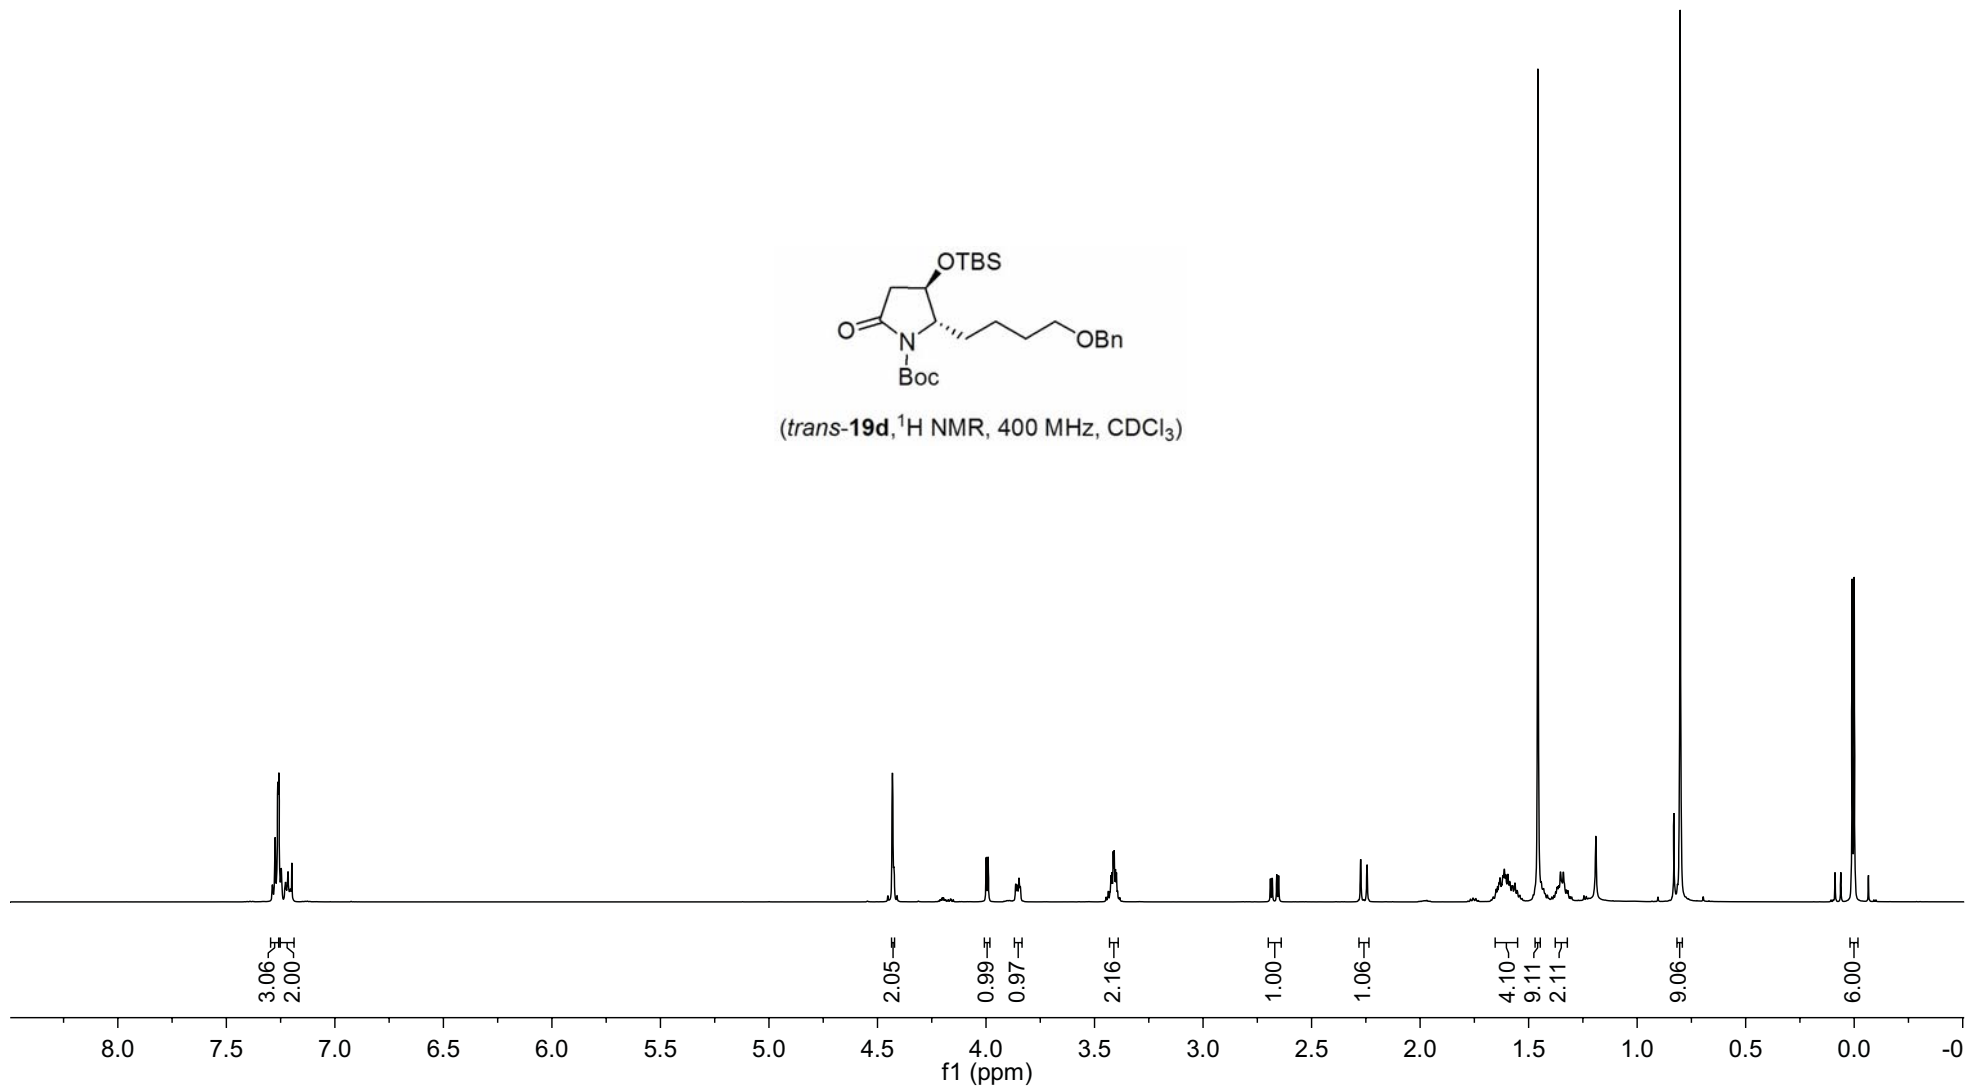

— 172.580  
 — 150.089  
 — 138.472  
 { 128.389  
 { 127.621  
 — 82.790  
 { 72.996  
 { 69.782  
 { 68.317  
 { 67.896  
 — 41.707  
 { 31.867  
 { 29.652  
 { 28.062  
 { 25.671  
 { 22.771  
 { 17.942  
 { -4.655  
 { -4.684

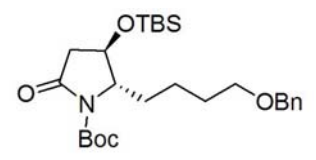

(*trans*-**19d**, <sup>13</sup>C NMR, 100 MHz, CDCl<sub>3</sub>)

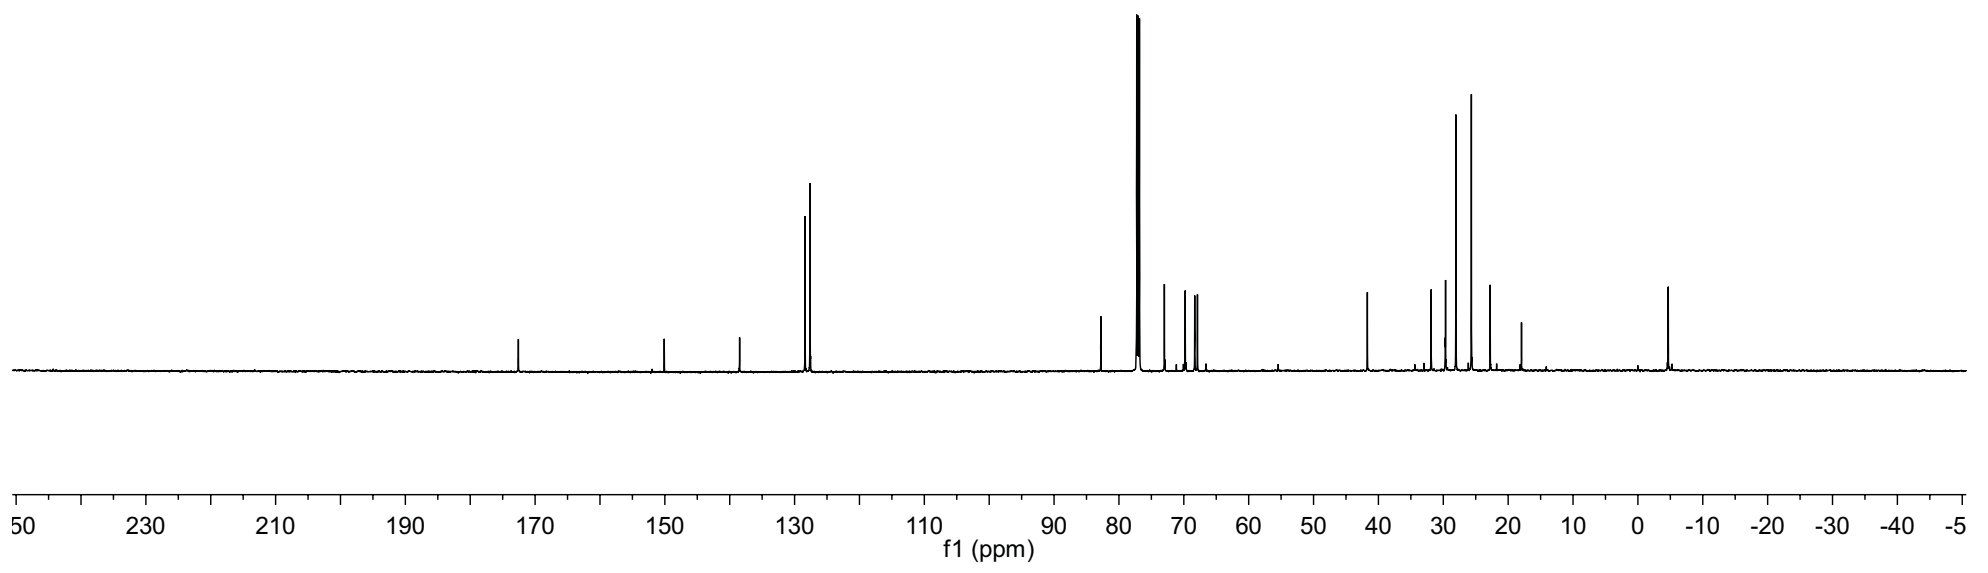

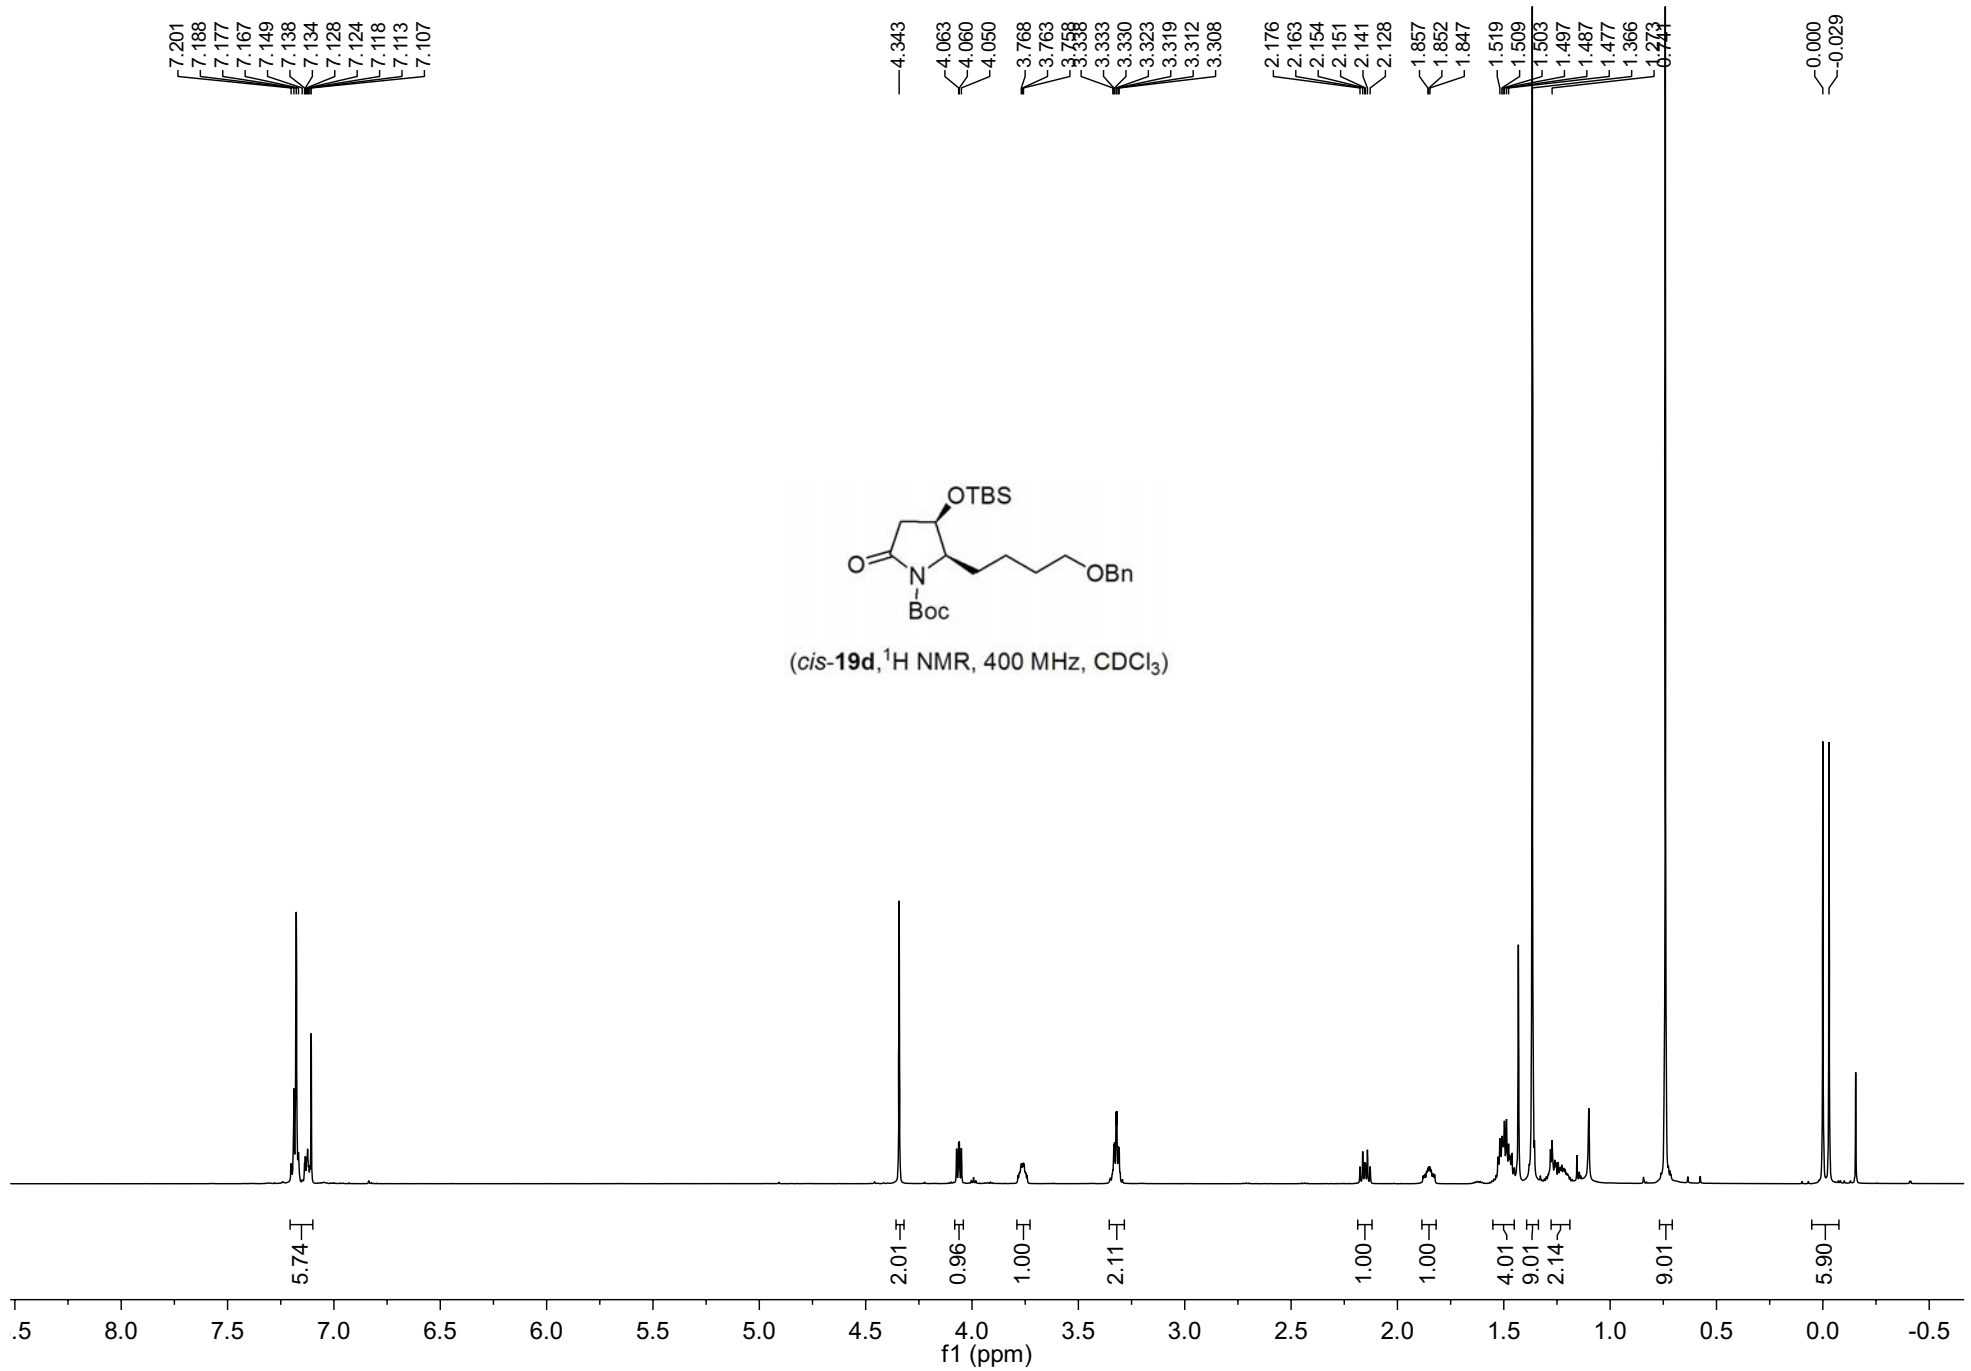

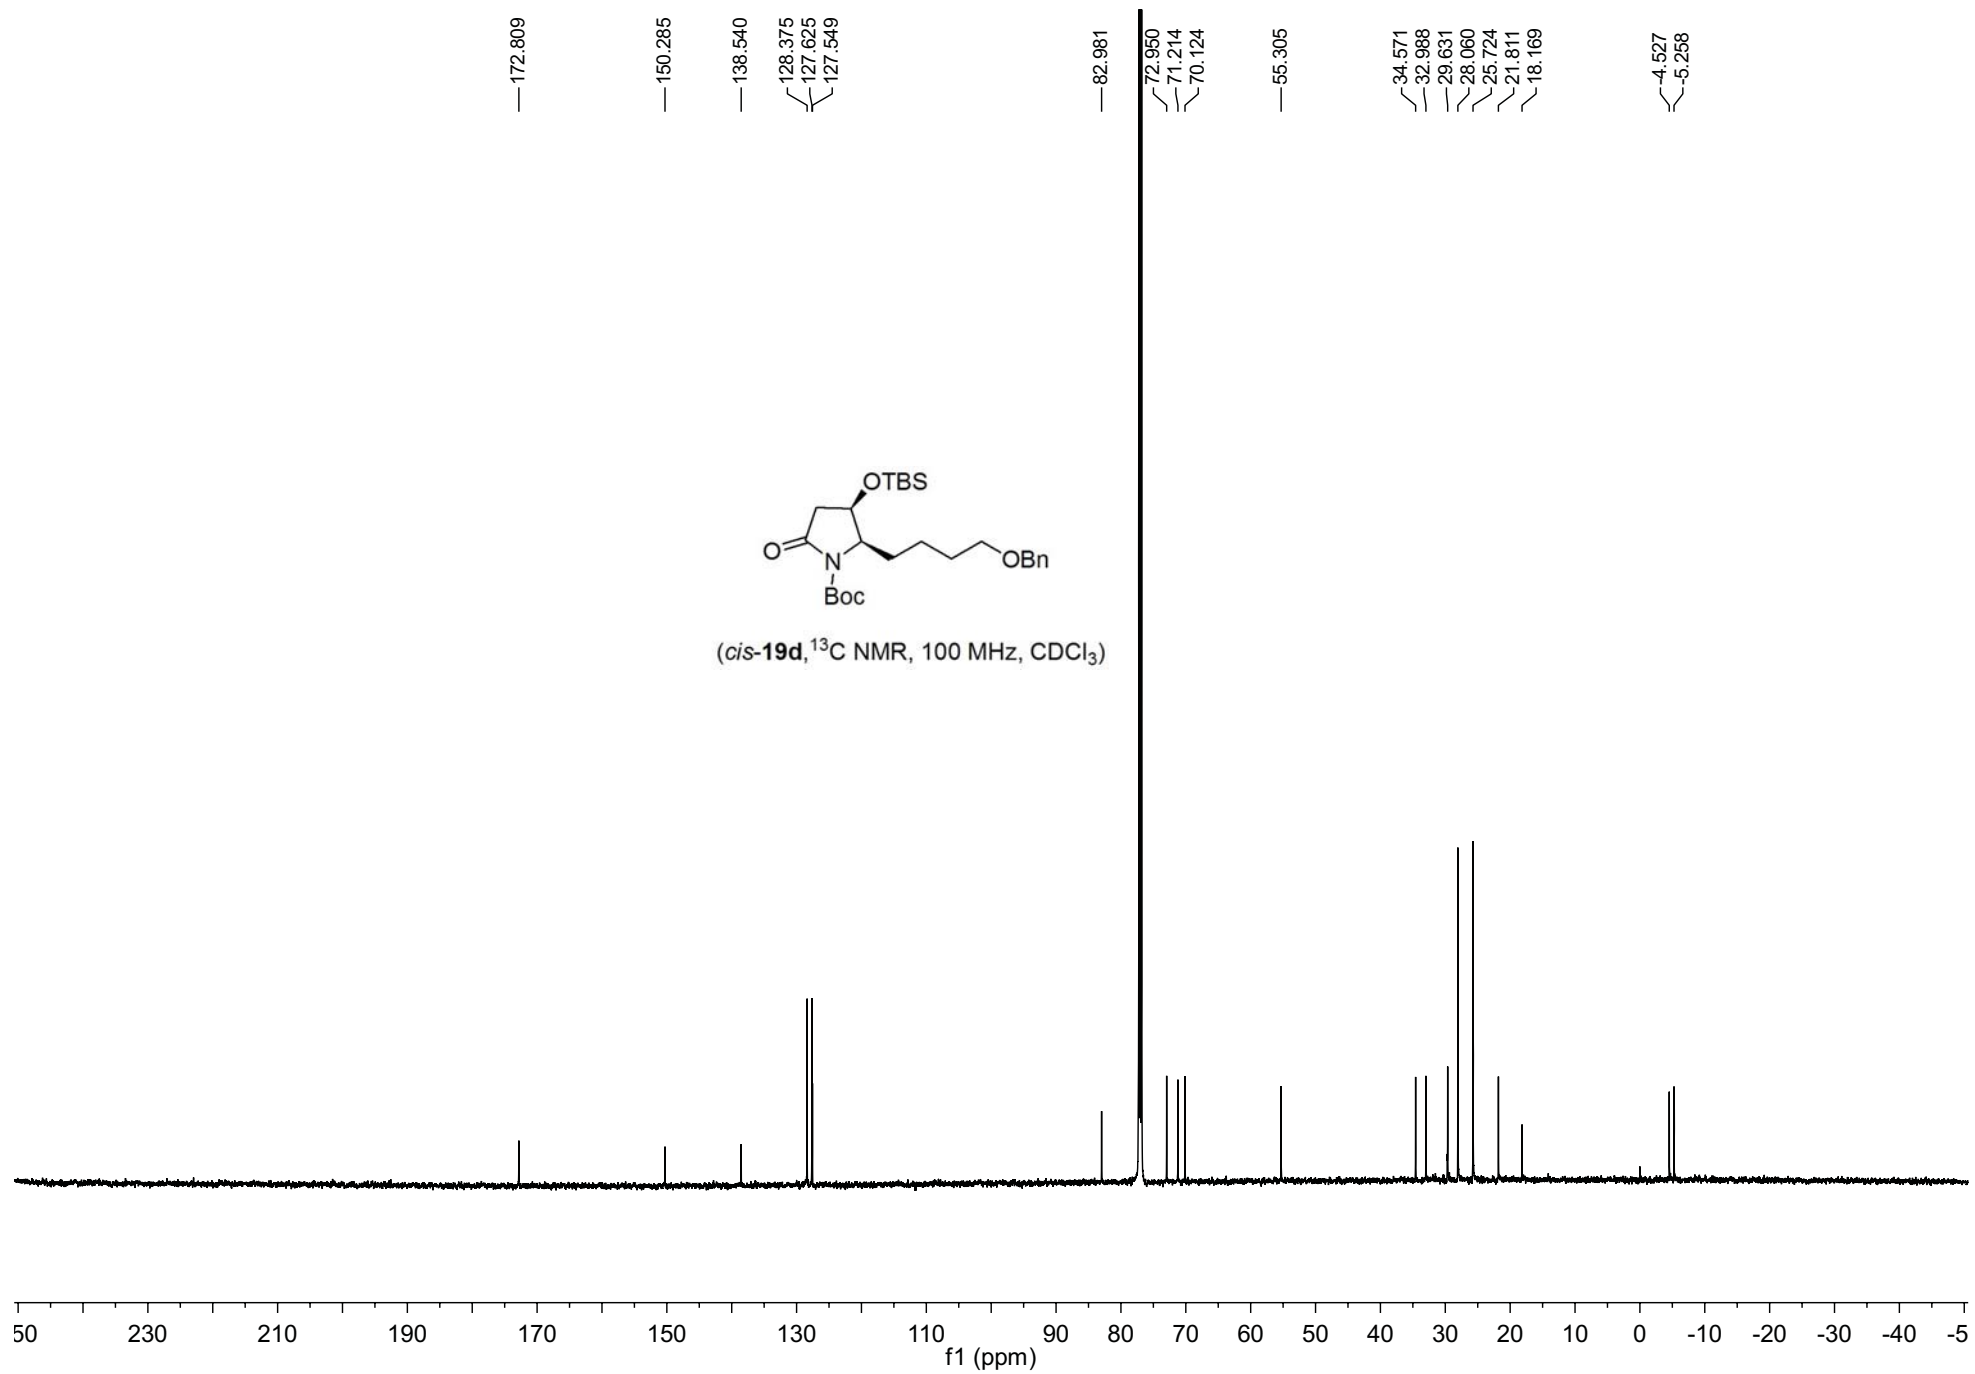

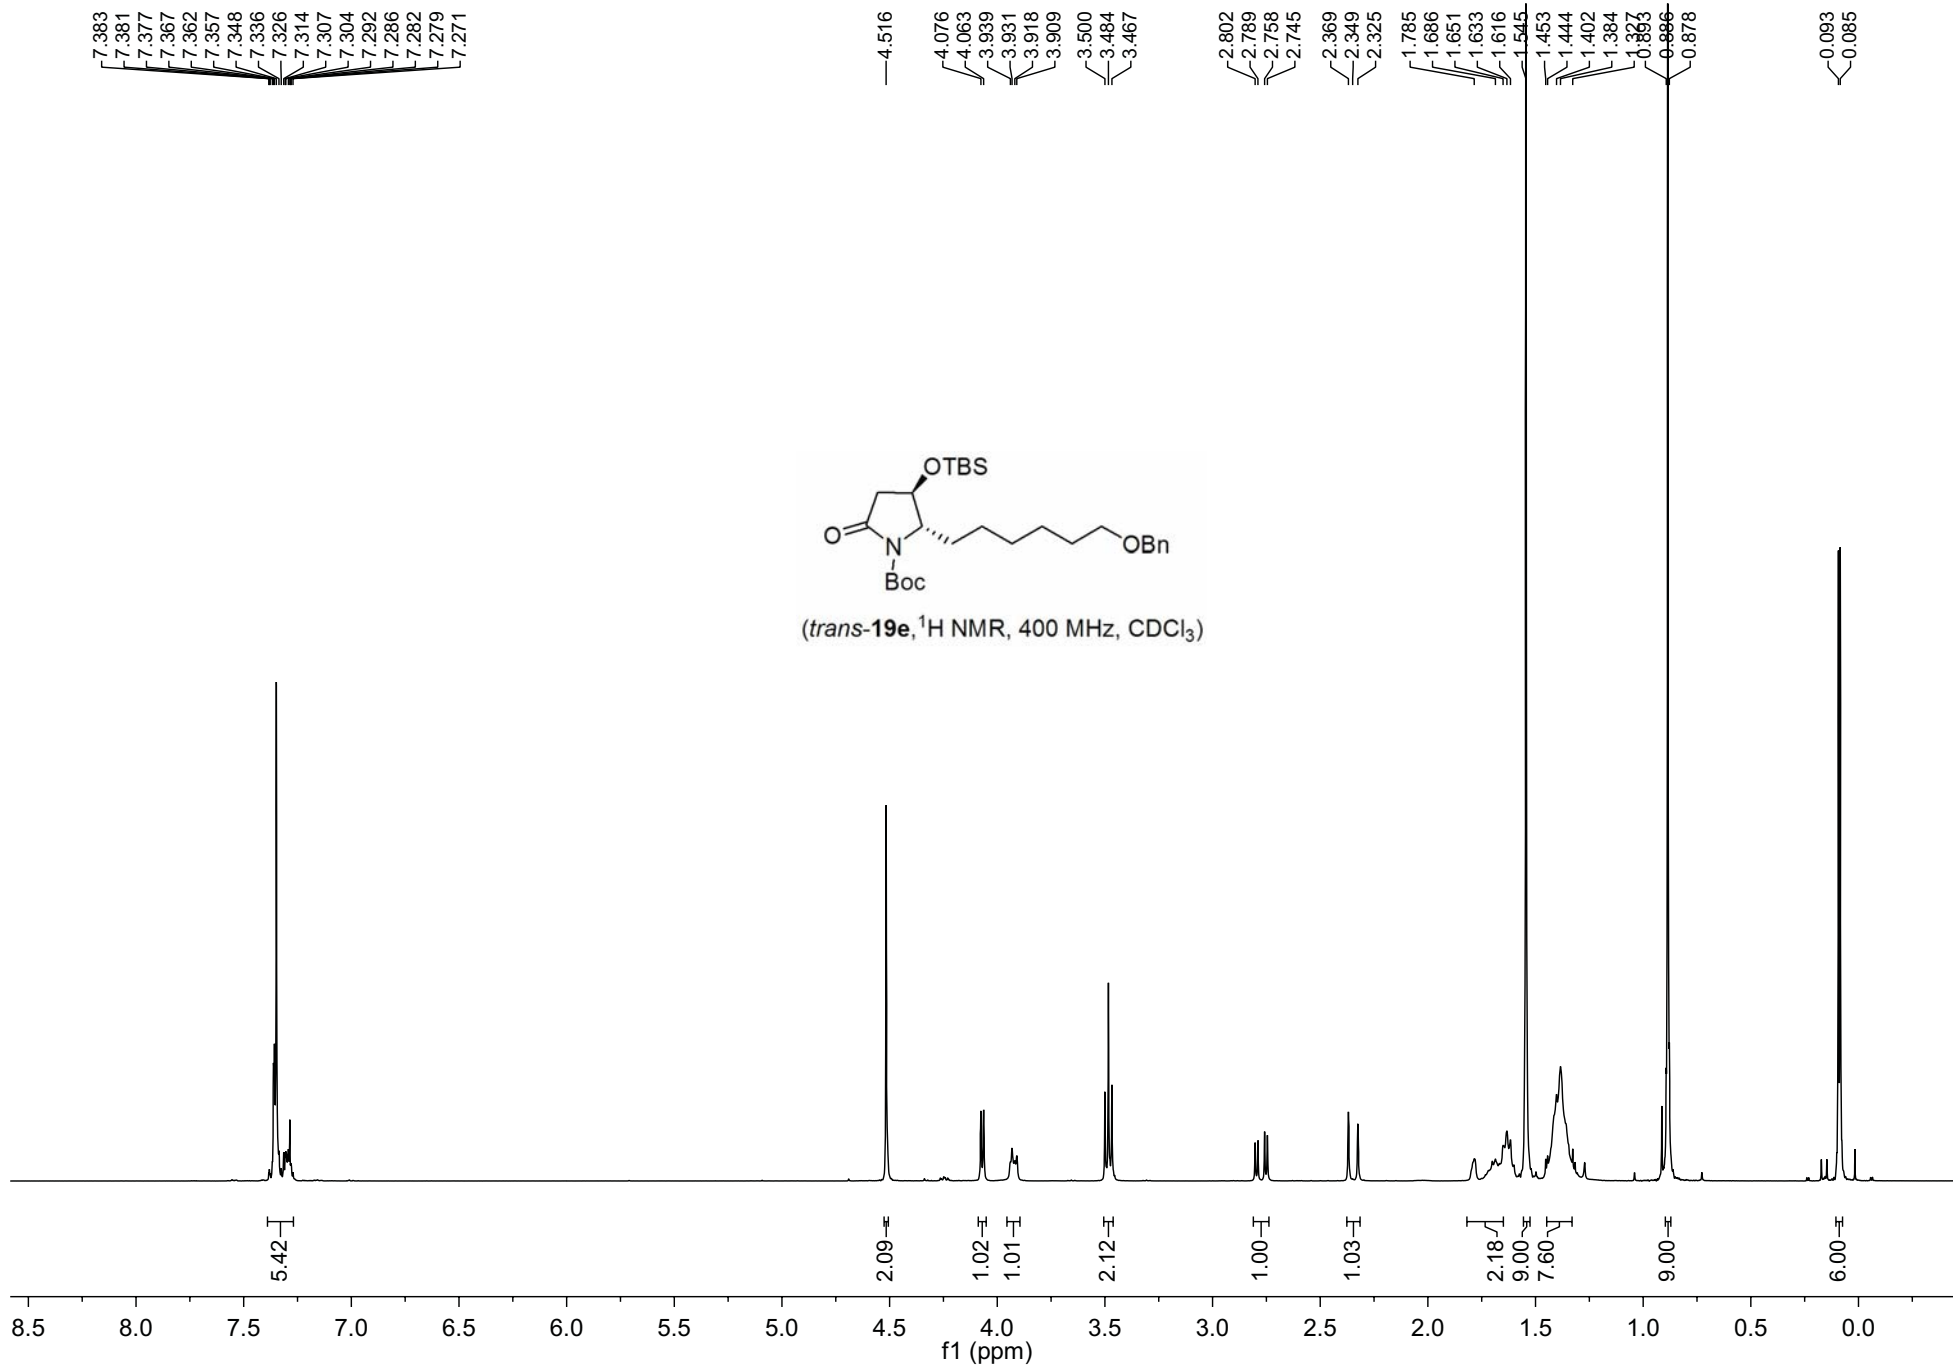

— 172.678  
 — 150.056  
 — 138.594  
 { 128.358  
 { 127.616  
 { 127.529  
 — 82.750  
 { 72.903  
 { 70.263  
 { 68.323  
 { 67.937  
 — 41.701  
 { 29.659  
 { 29.376  
 { 28.059  
 { 26.148  
 { 25.977  
 { 25.876  
 { 4.642  
 { 4.682

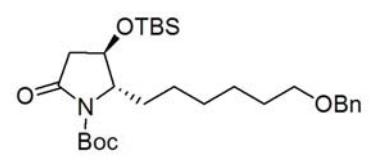

(*trans*-**19e**, <sup>13</sup>C NMR, 100 MHz, CDCl<sub>3</sub>)

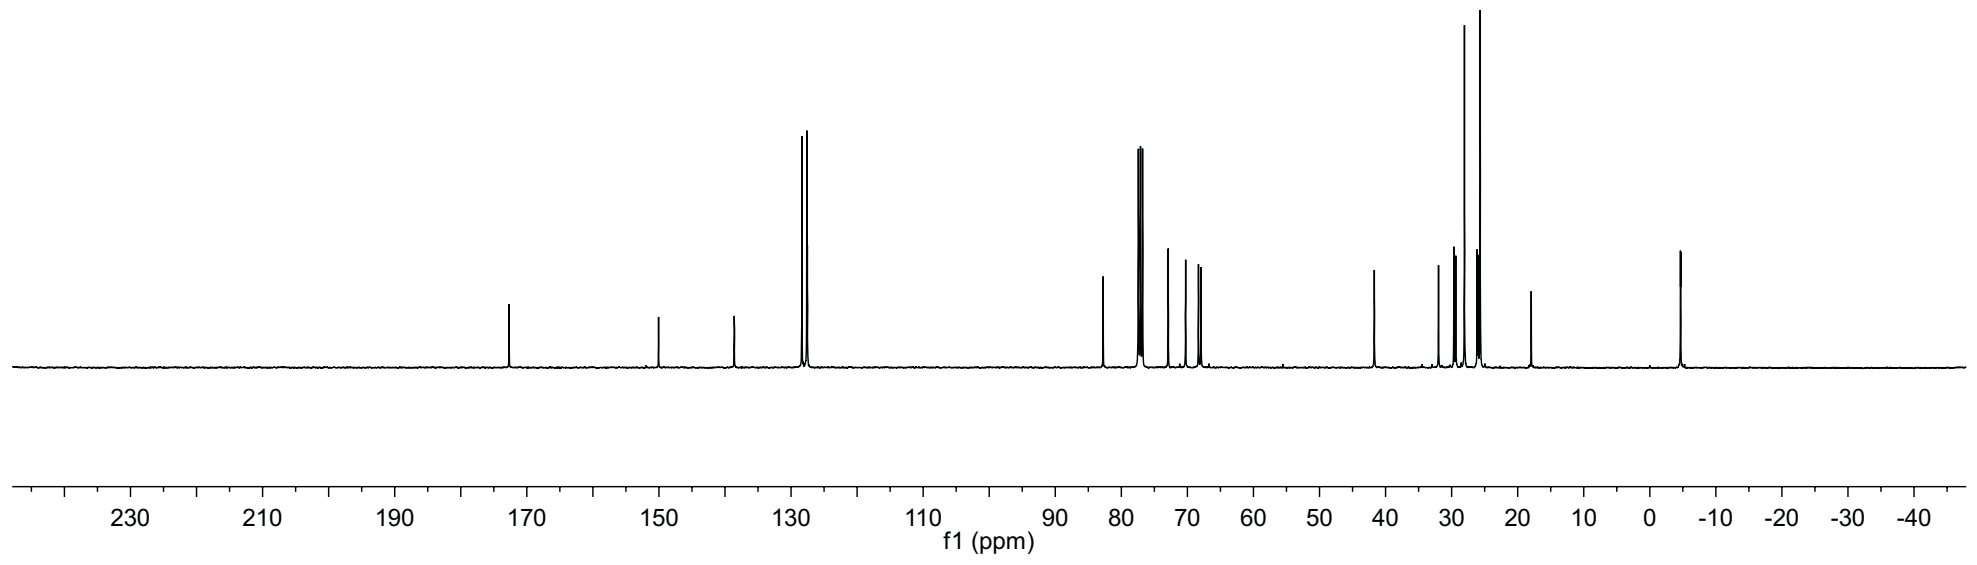



—7.285

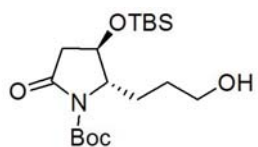

(**20**,  $^1\text{H NMR}$ , 400 MHz,  $\text{CDCl}_3$ )

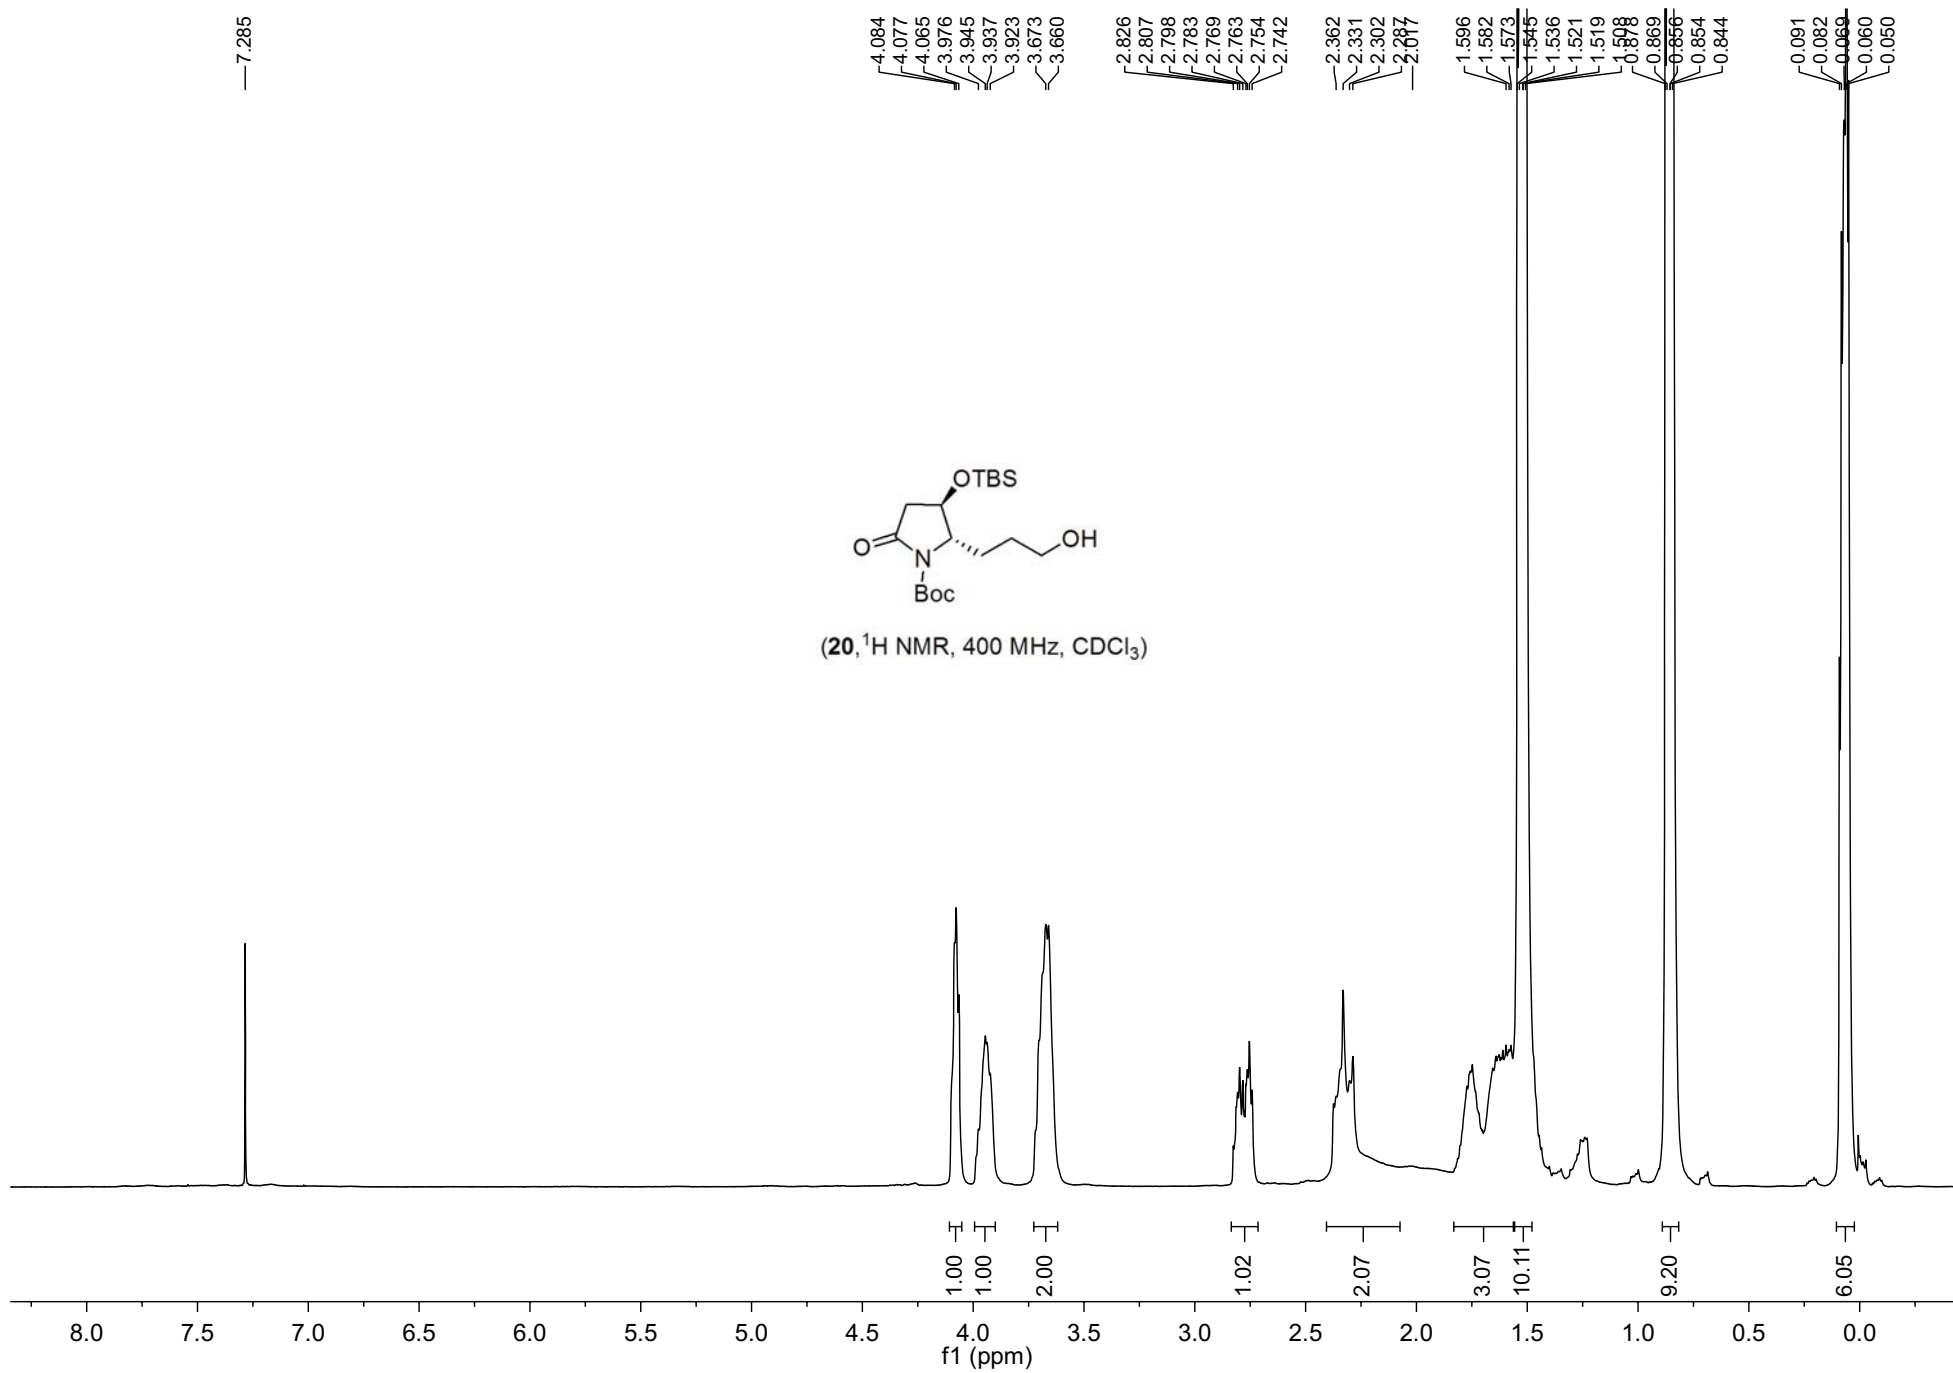

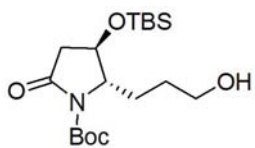

(**20**,  $^{13}\text{C}$  NMR, 100 MHz,  $\text{CDCl}_3$ )

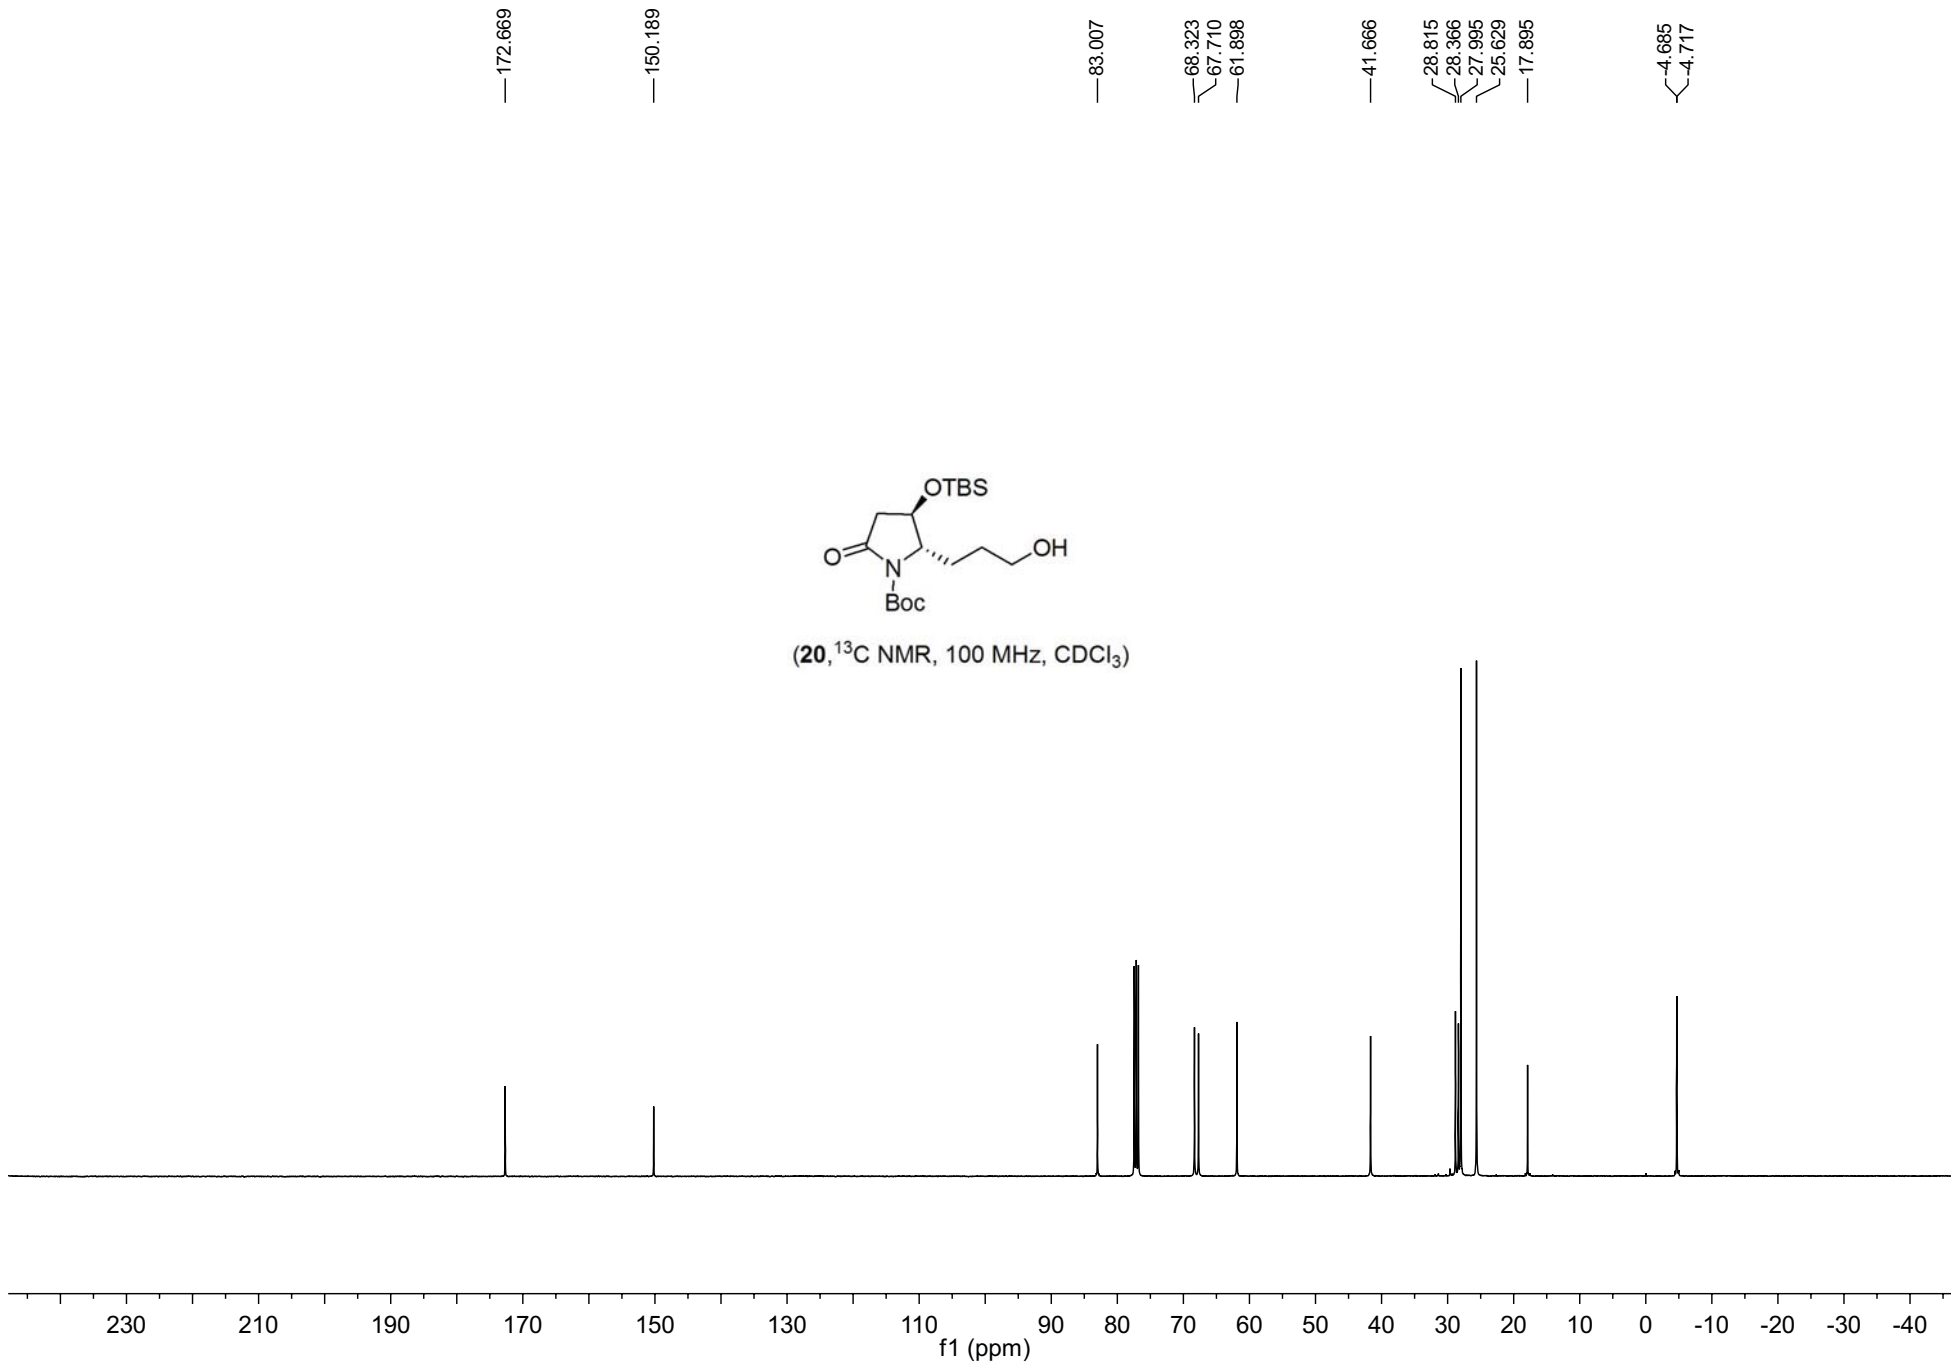

— 7.285

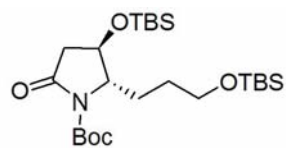

(*trans*-**19b**,  $^1\text{H}$  NMR, 400 MHz,  $\text{CDCl}_3$ )

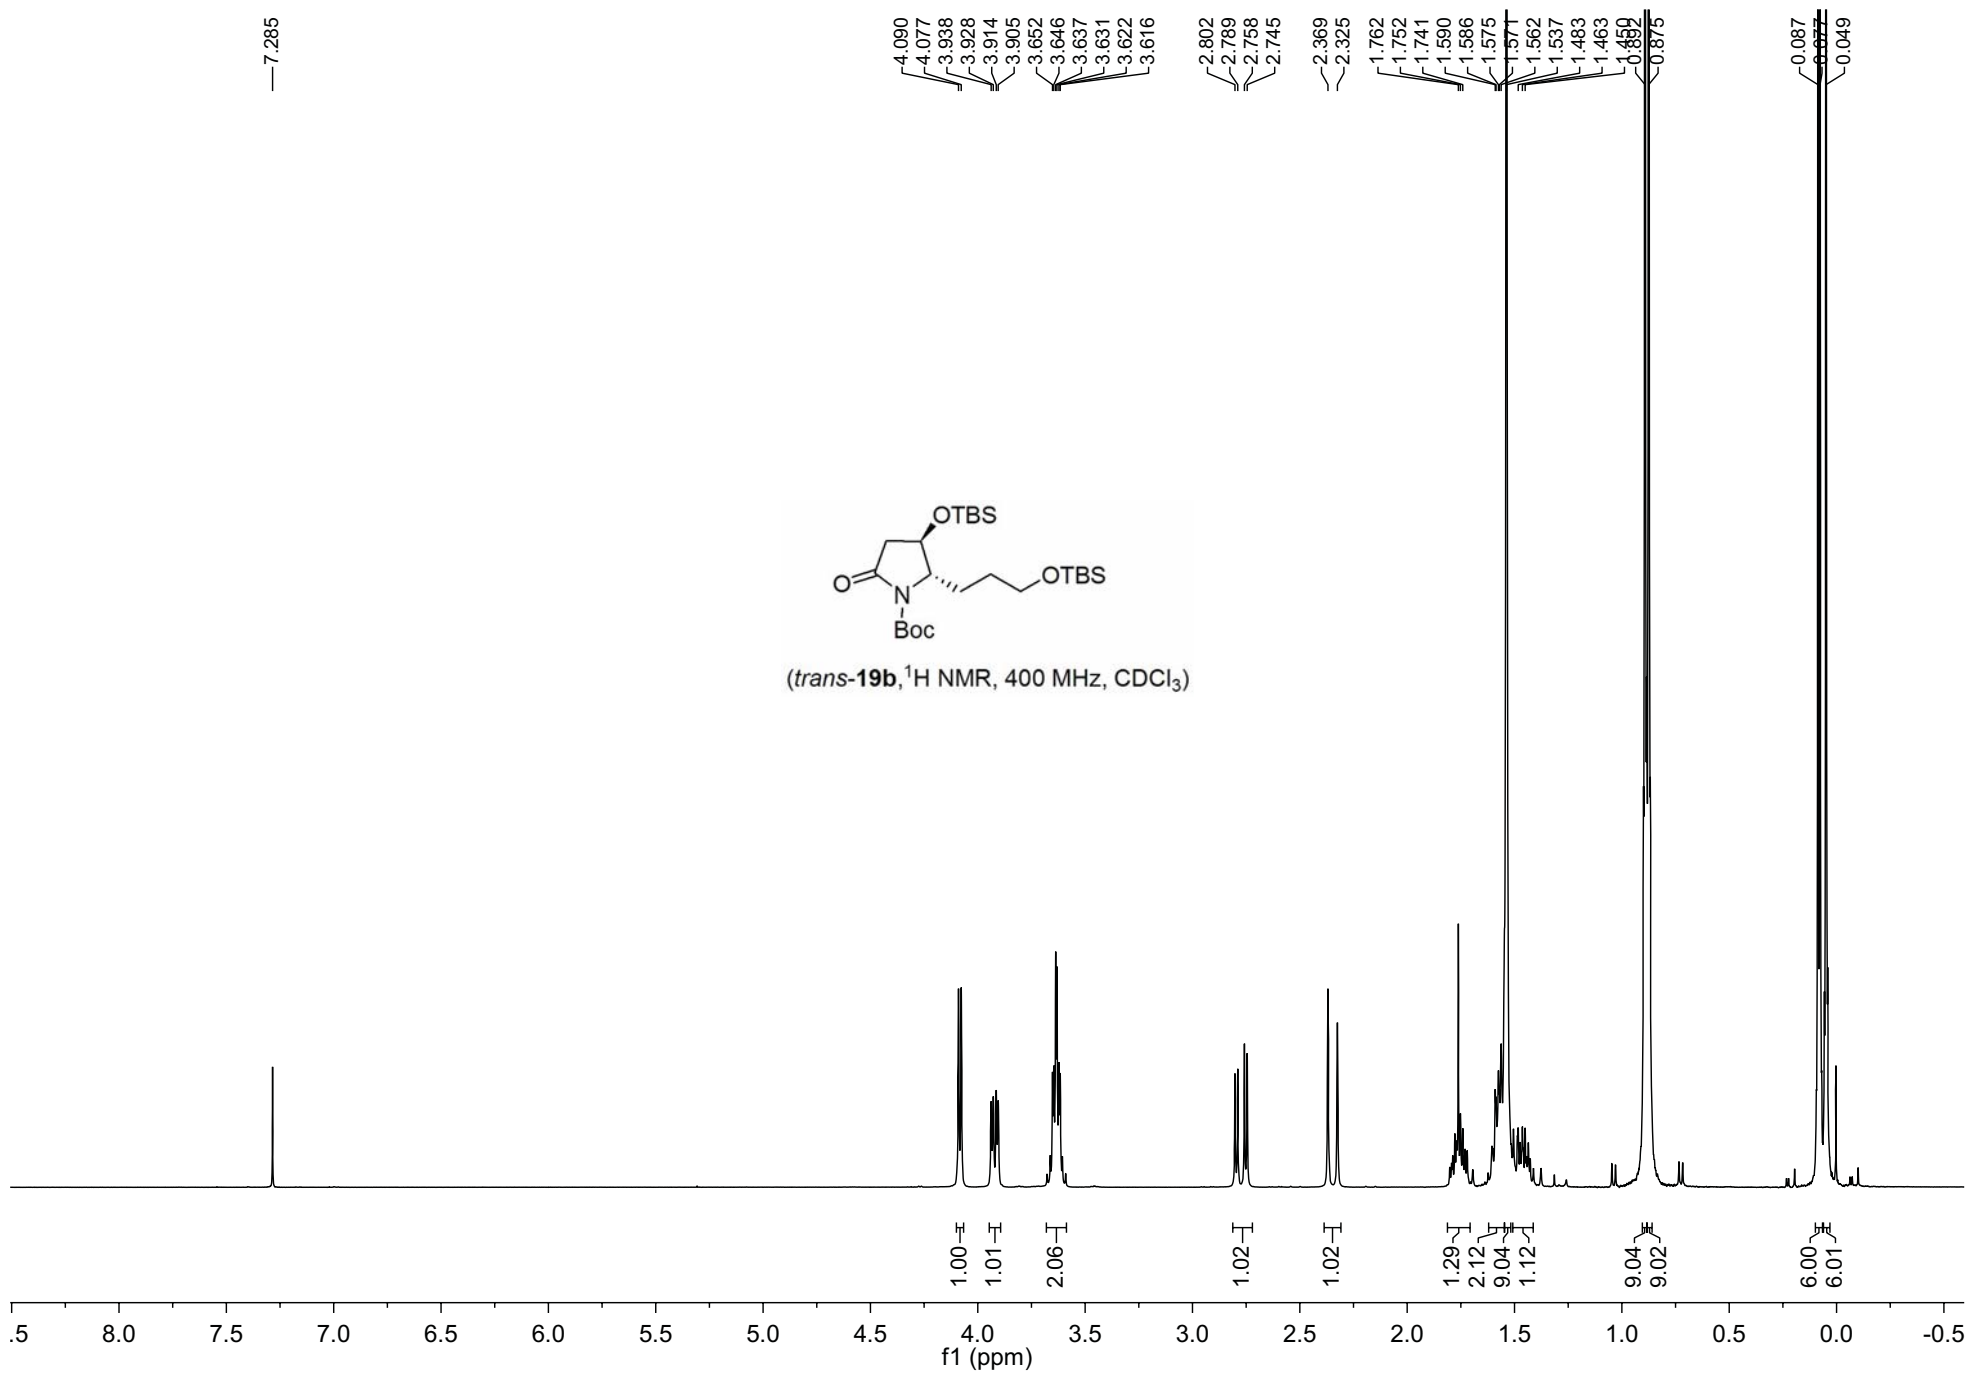

4.090  
4.077  
3.938  
3.928  
3.914  
3.905  
3.652  
3.646  
3.637  
3.631  
3.622  
3.616  
2.802  
2.789  
2.758  
2.745  
2.369  
2.325  
1.762  
1.752  
1.741  
1.590  
1.586  
1.575  
1.571  
1.562  
1.537  
1.483  
1.463  
1.450  
0.875  
0.087  
0.077  
0.049

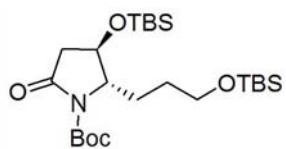

(*trans*-19b,  $^{13}\text{C}$  NMR, 100 MHz,  $\text{CDCl}_3$ )

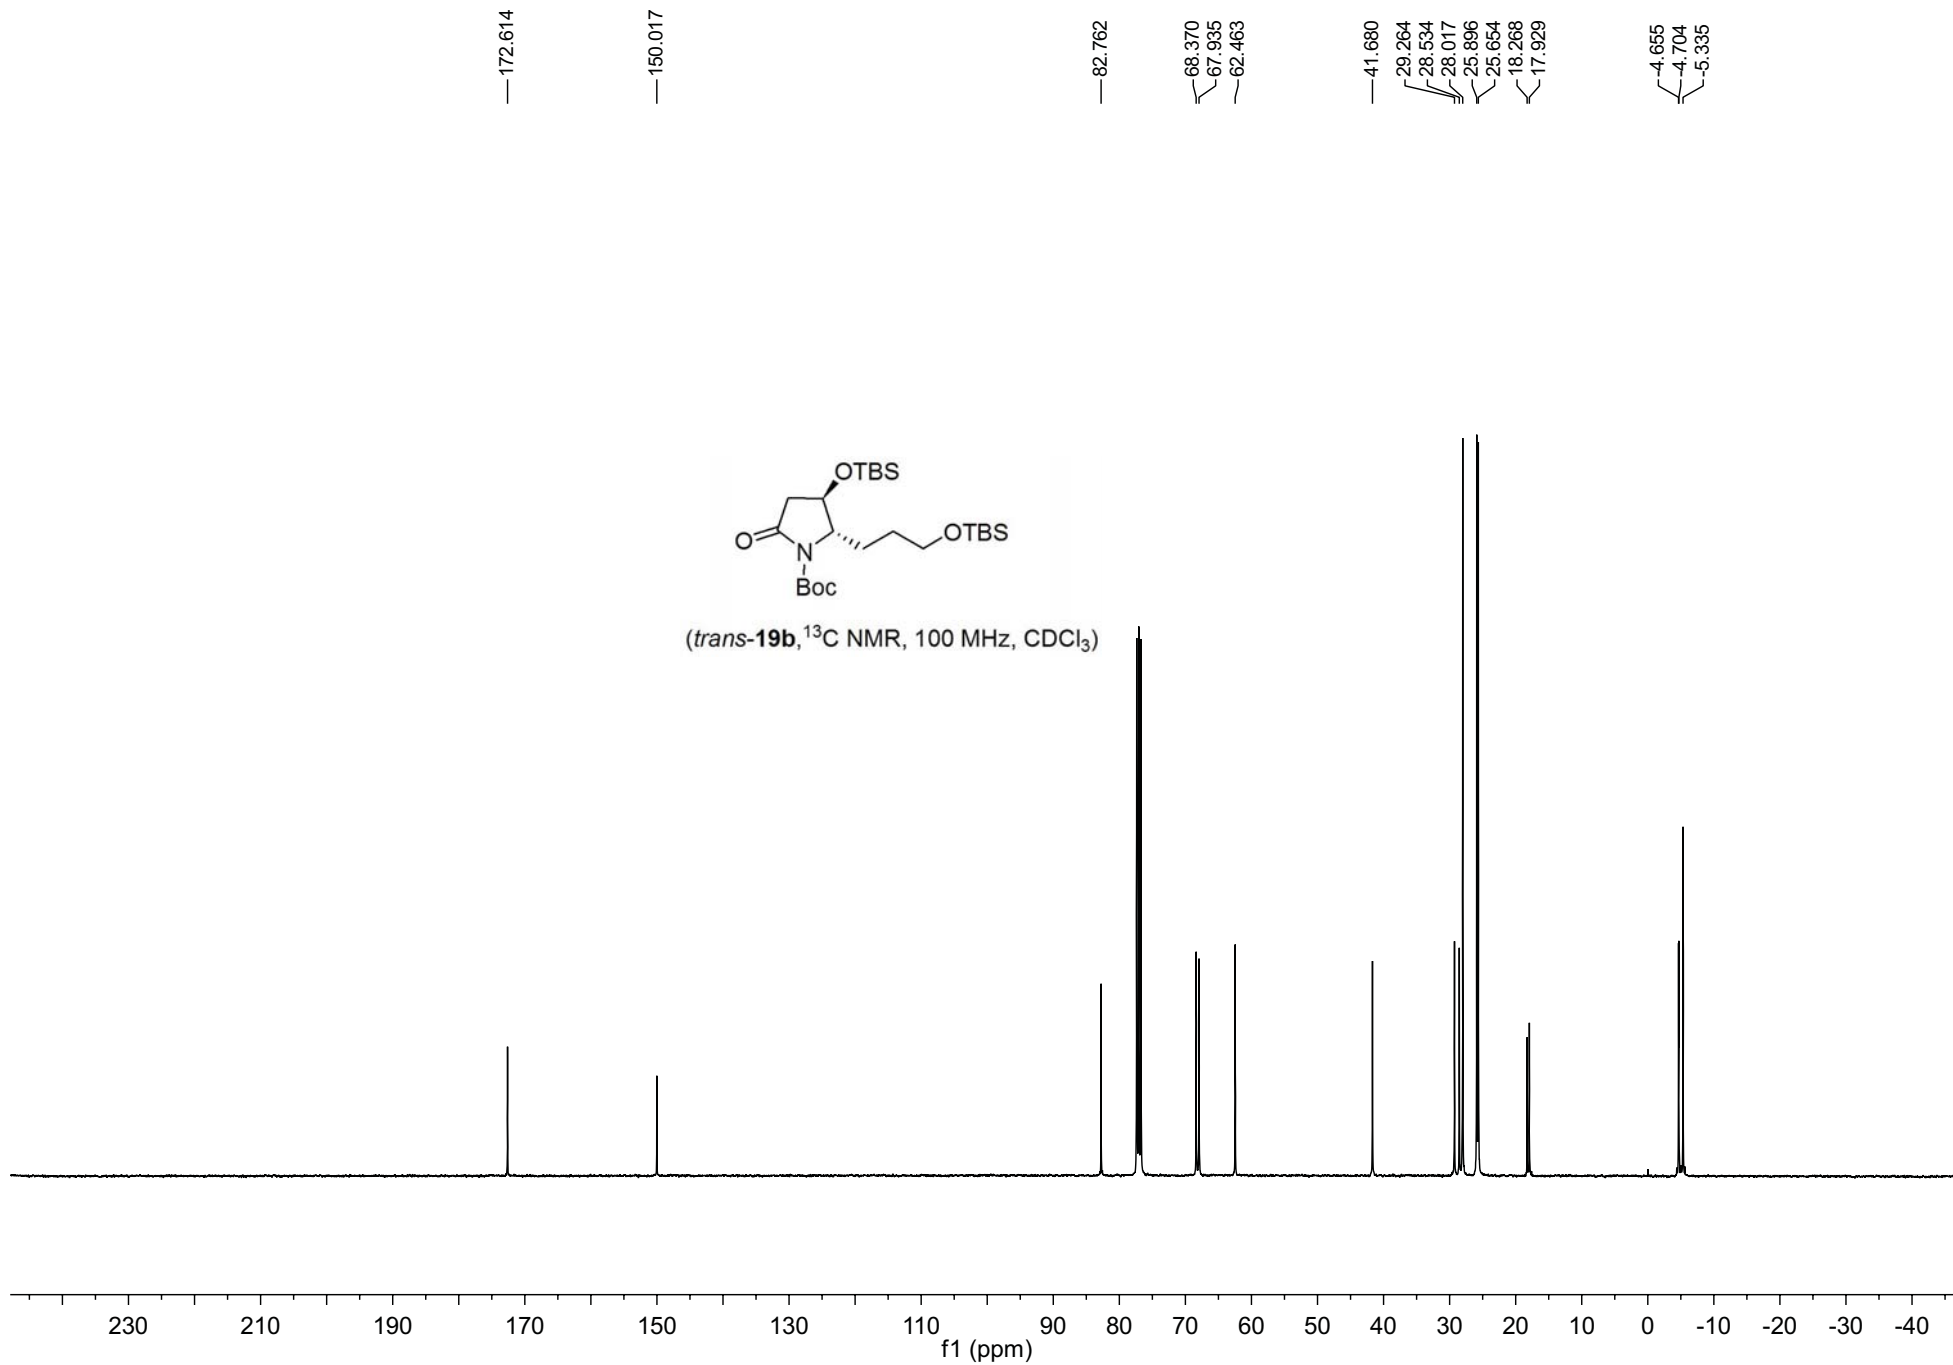

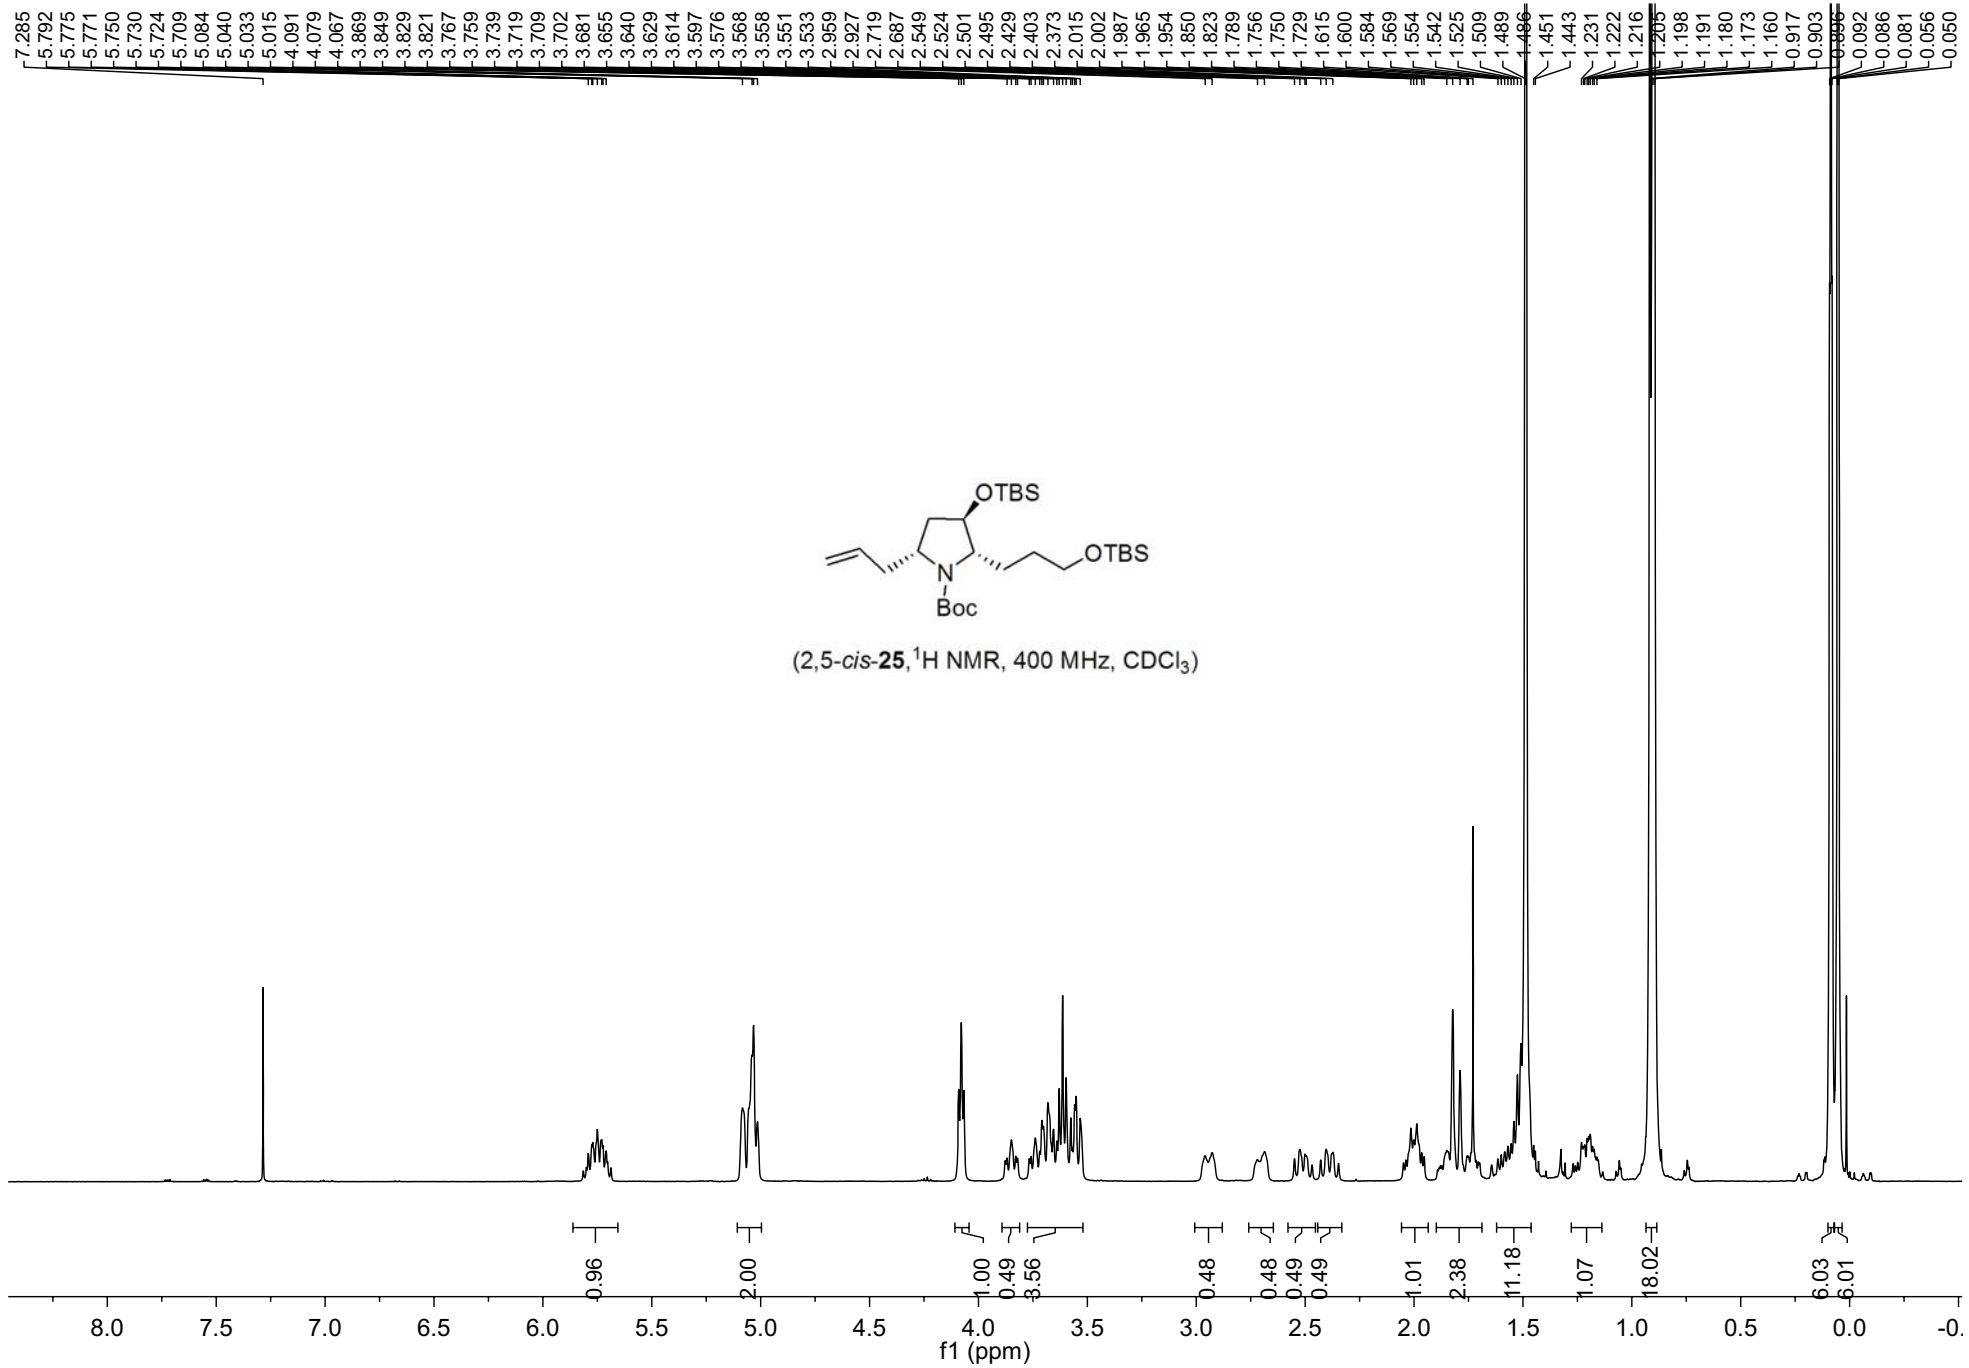

154.039  
153.896

136.372  
136.325

116.643  
116.589

79.038  
76.122  
75.206

67.753  
63.047  
57.624  
57.316

35.486  
34.635  
30.218  
30.072  
29.844  
28.565  
28.049  
25.941  
25.787  
25.357  
18.288  
17.936

-4.706  
-4.826  
-5.259  
-5.290

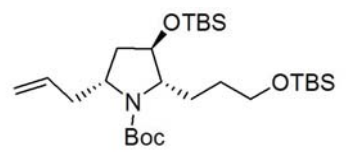

(2,5-cis-25, <sup>13</sup>C NMR, 100 MHz, CDCl<sub>3</sub>)

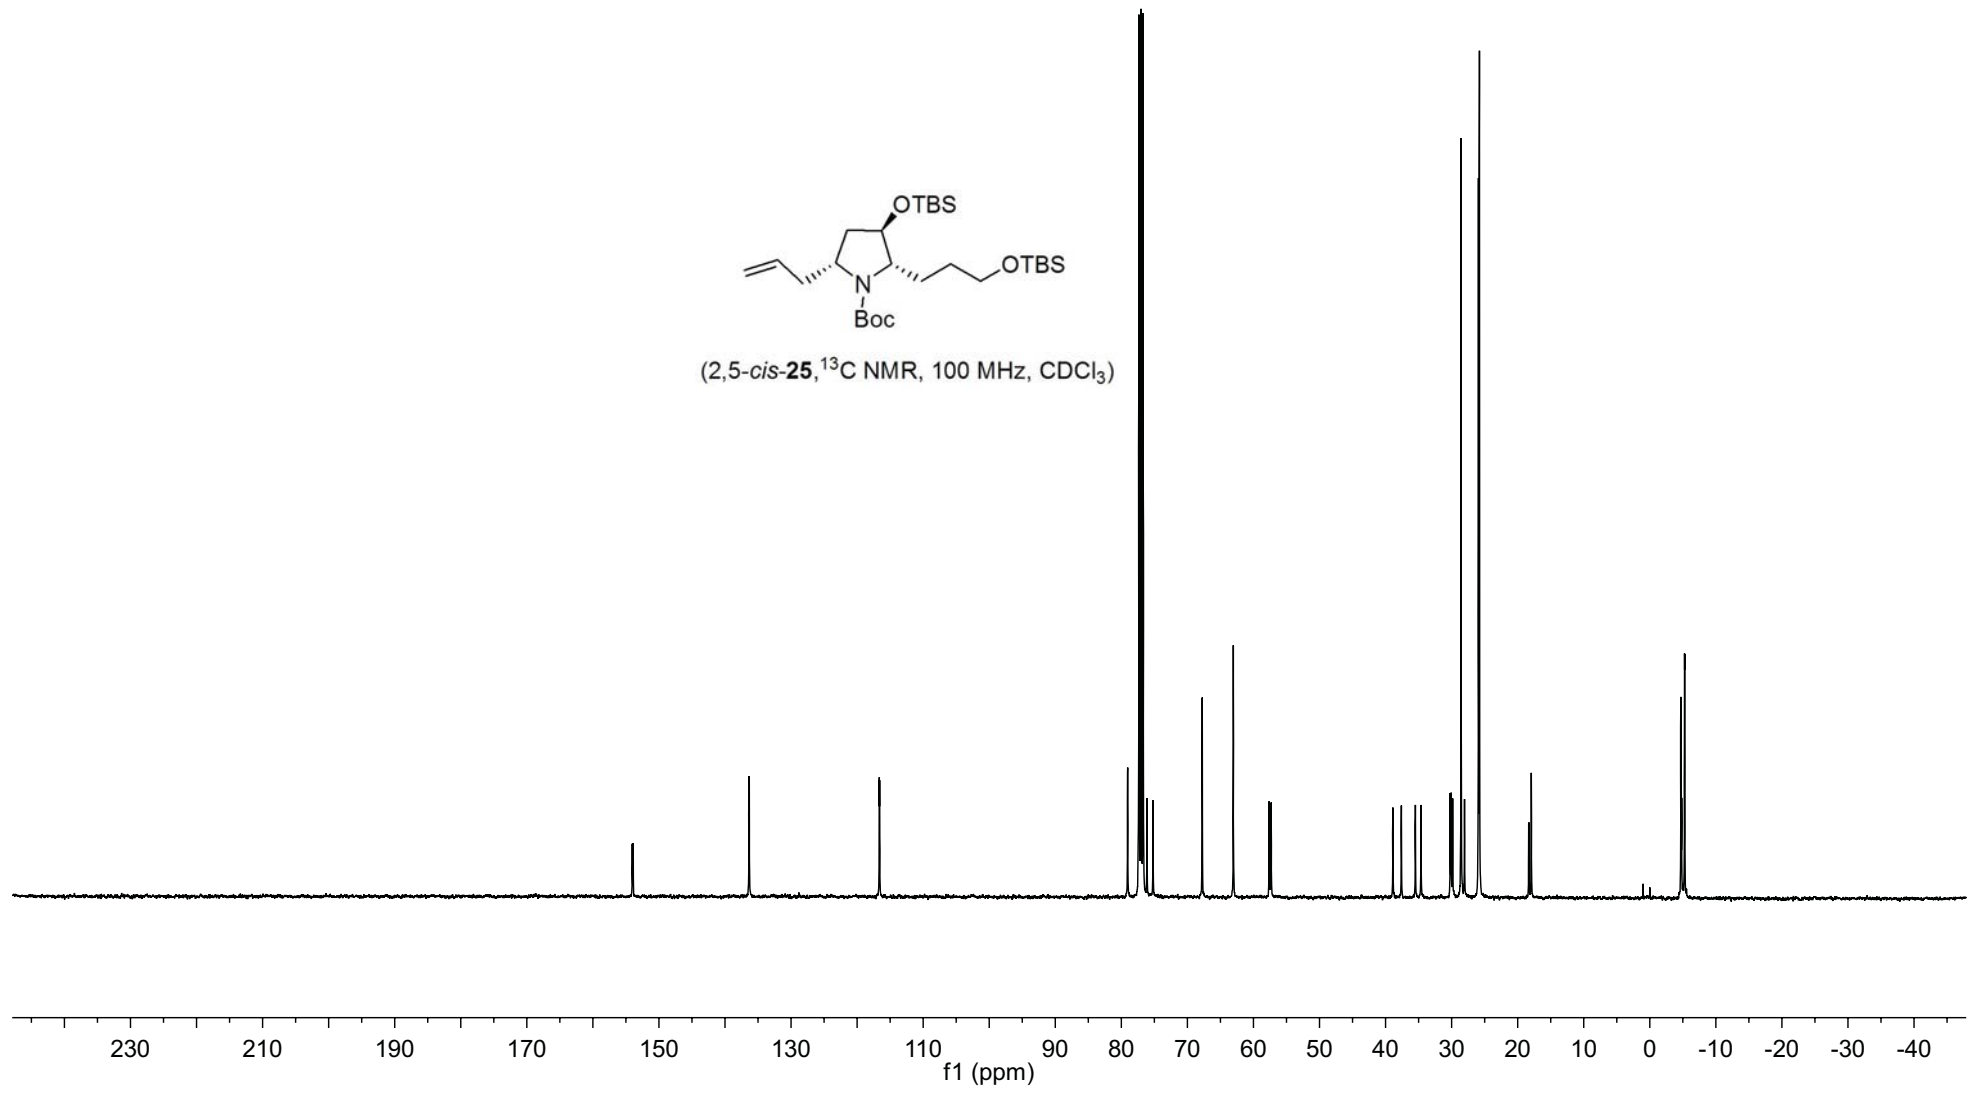

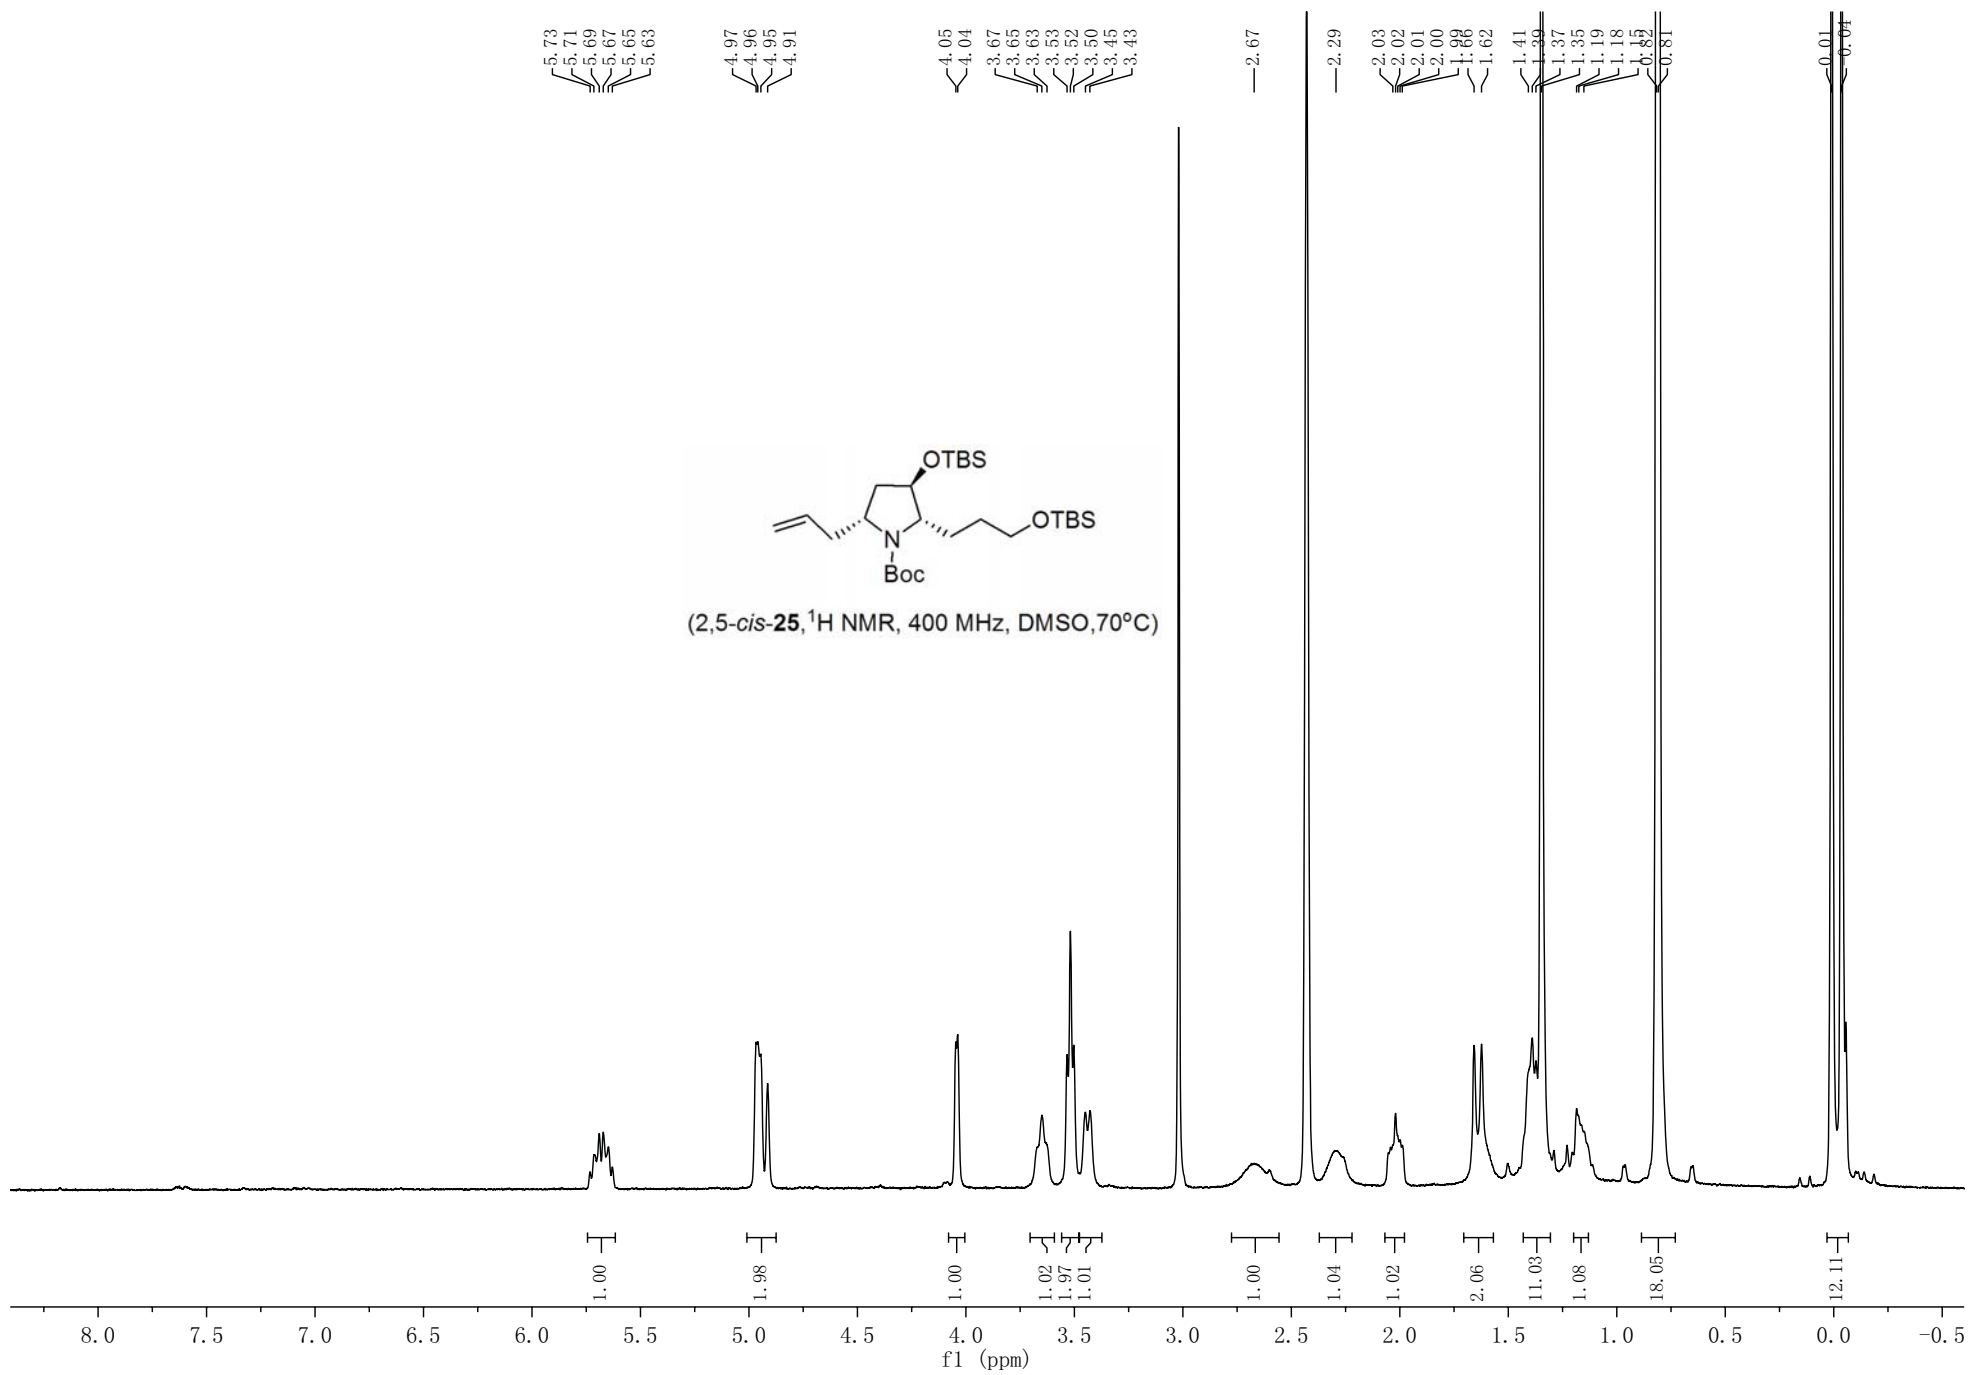

6.959  
6.944  
6.938  
6.922  
6.899  
6.883  
6.878  
6.862  
5.875  
5.859  
5.836  
5.820  
4.103  
4.091  
4.078  
3.955  
3.932  
3.915  
3.907  
3.855  
3.839  
3.833  
3.817  
3.750  
3.732  
3.704  
3.684  
3.677  
3.665  
3.660  
3.650  
3.635  
3.625  
3.609  
3.593  
3.573  
3.556  
3.532  
3.144  
3.109  
2.847  
2.712  
2.689  
2.678  
2.592  
2.582  
2.568  
2.557  
2.080  
2.069  
2.059  
2.047  
2.037  
2.027  
2.015  
2.005  
2.000  
1.860  
1.757  
1.740  
1.730  
1.721  
1.706  
1.696  
1.580  
1.565  
1.550  
1.534  
1.519  
1.503  
1.483  
1.480  
1.443  
1.226  
1.208  
1.194  
1.187  
1.182  
1.171  
1.161  
1.147  
0.946  
0.900  
0.892  
0.091  
0.084  
0.053  
0.047

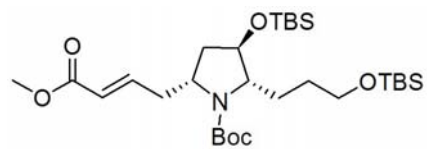

(26,  $^1\text{H}$  NMR, 400 MHz,  $\text{CDCl}_3$ )

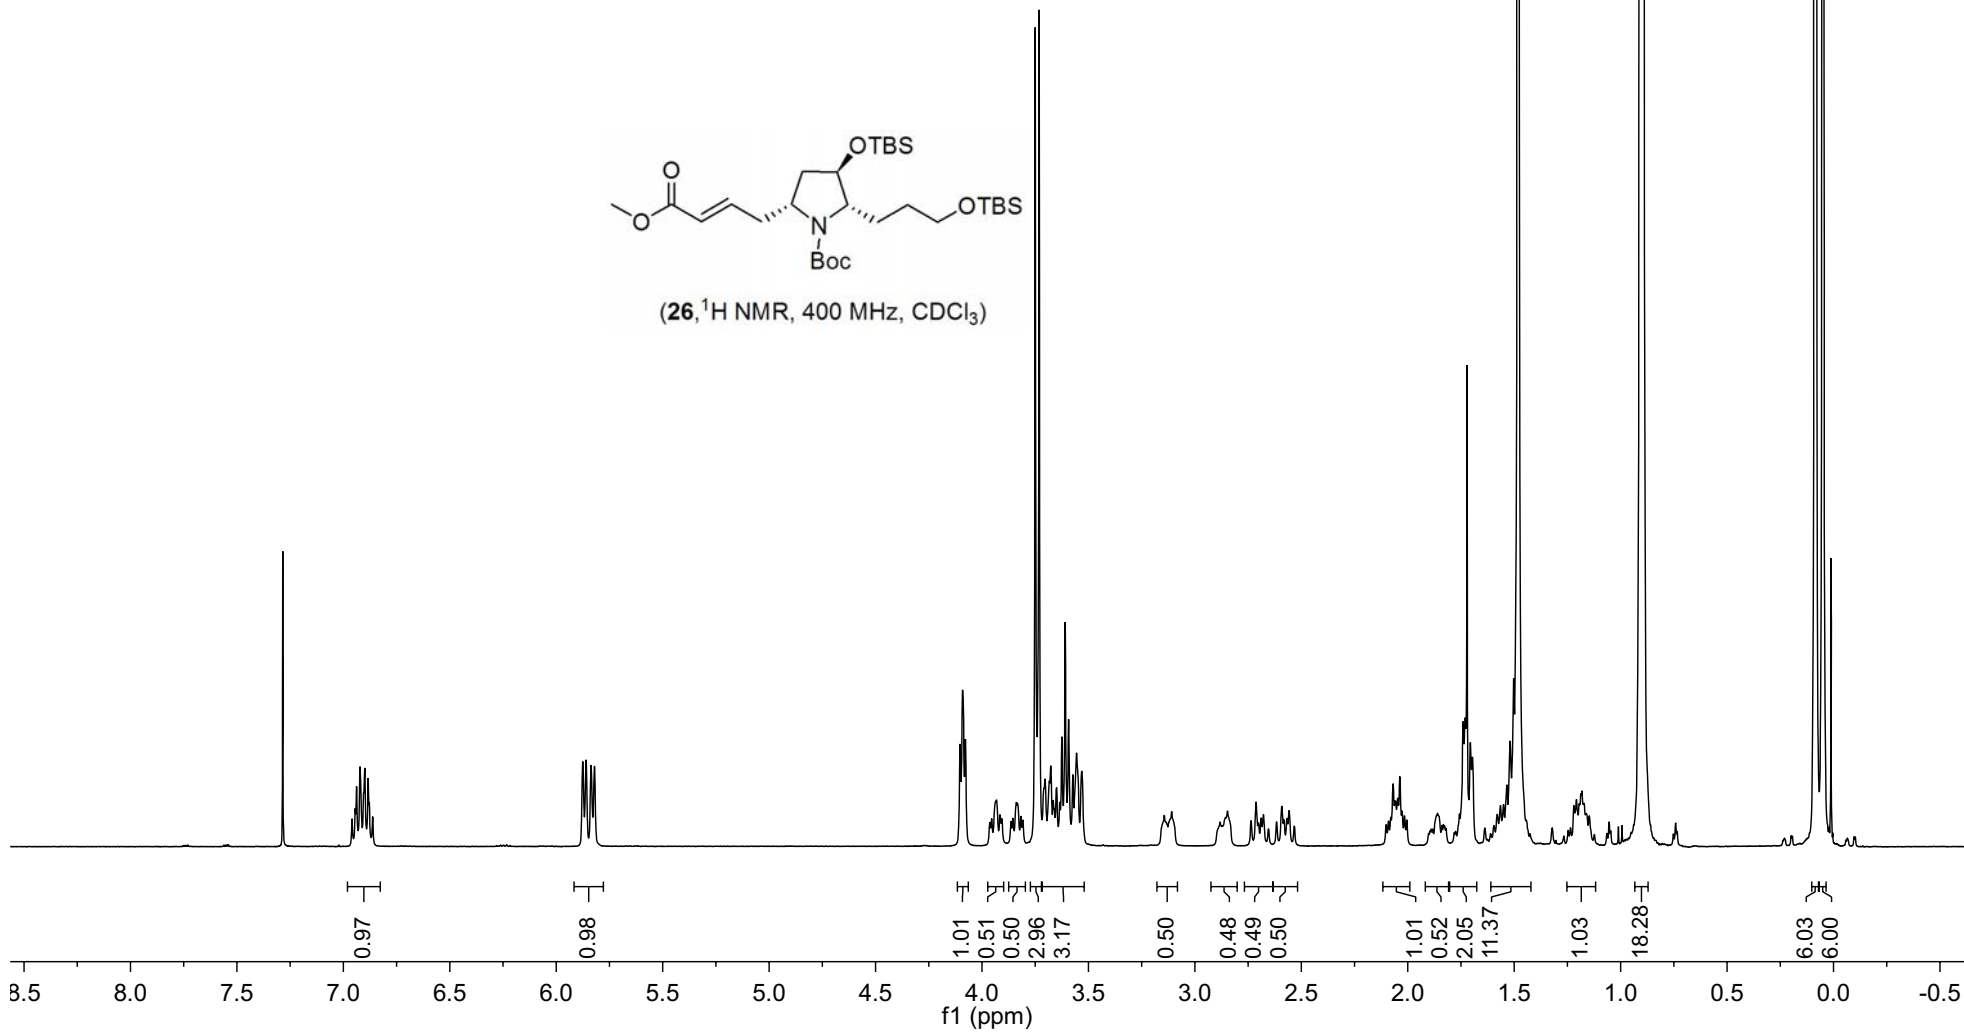



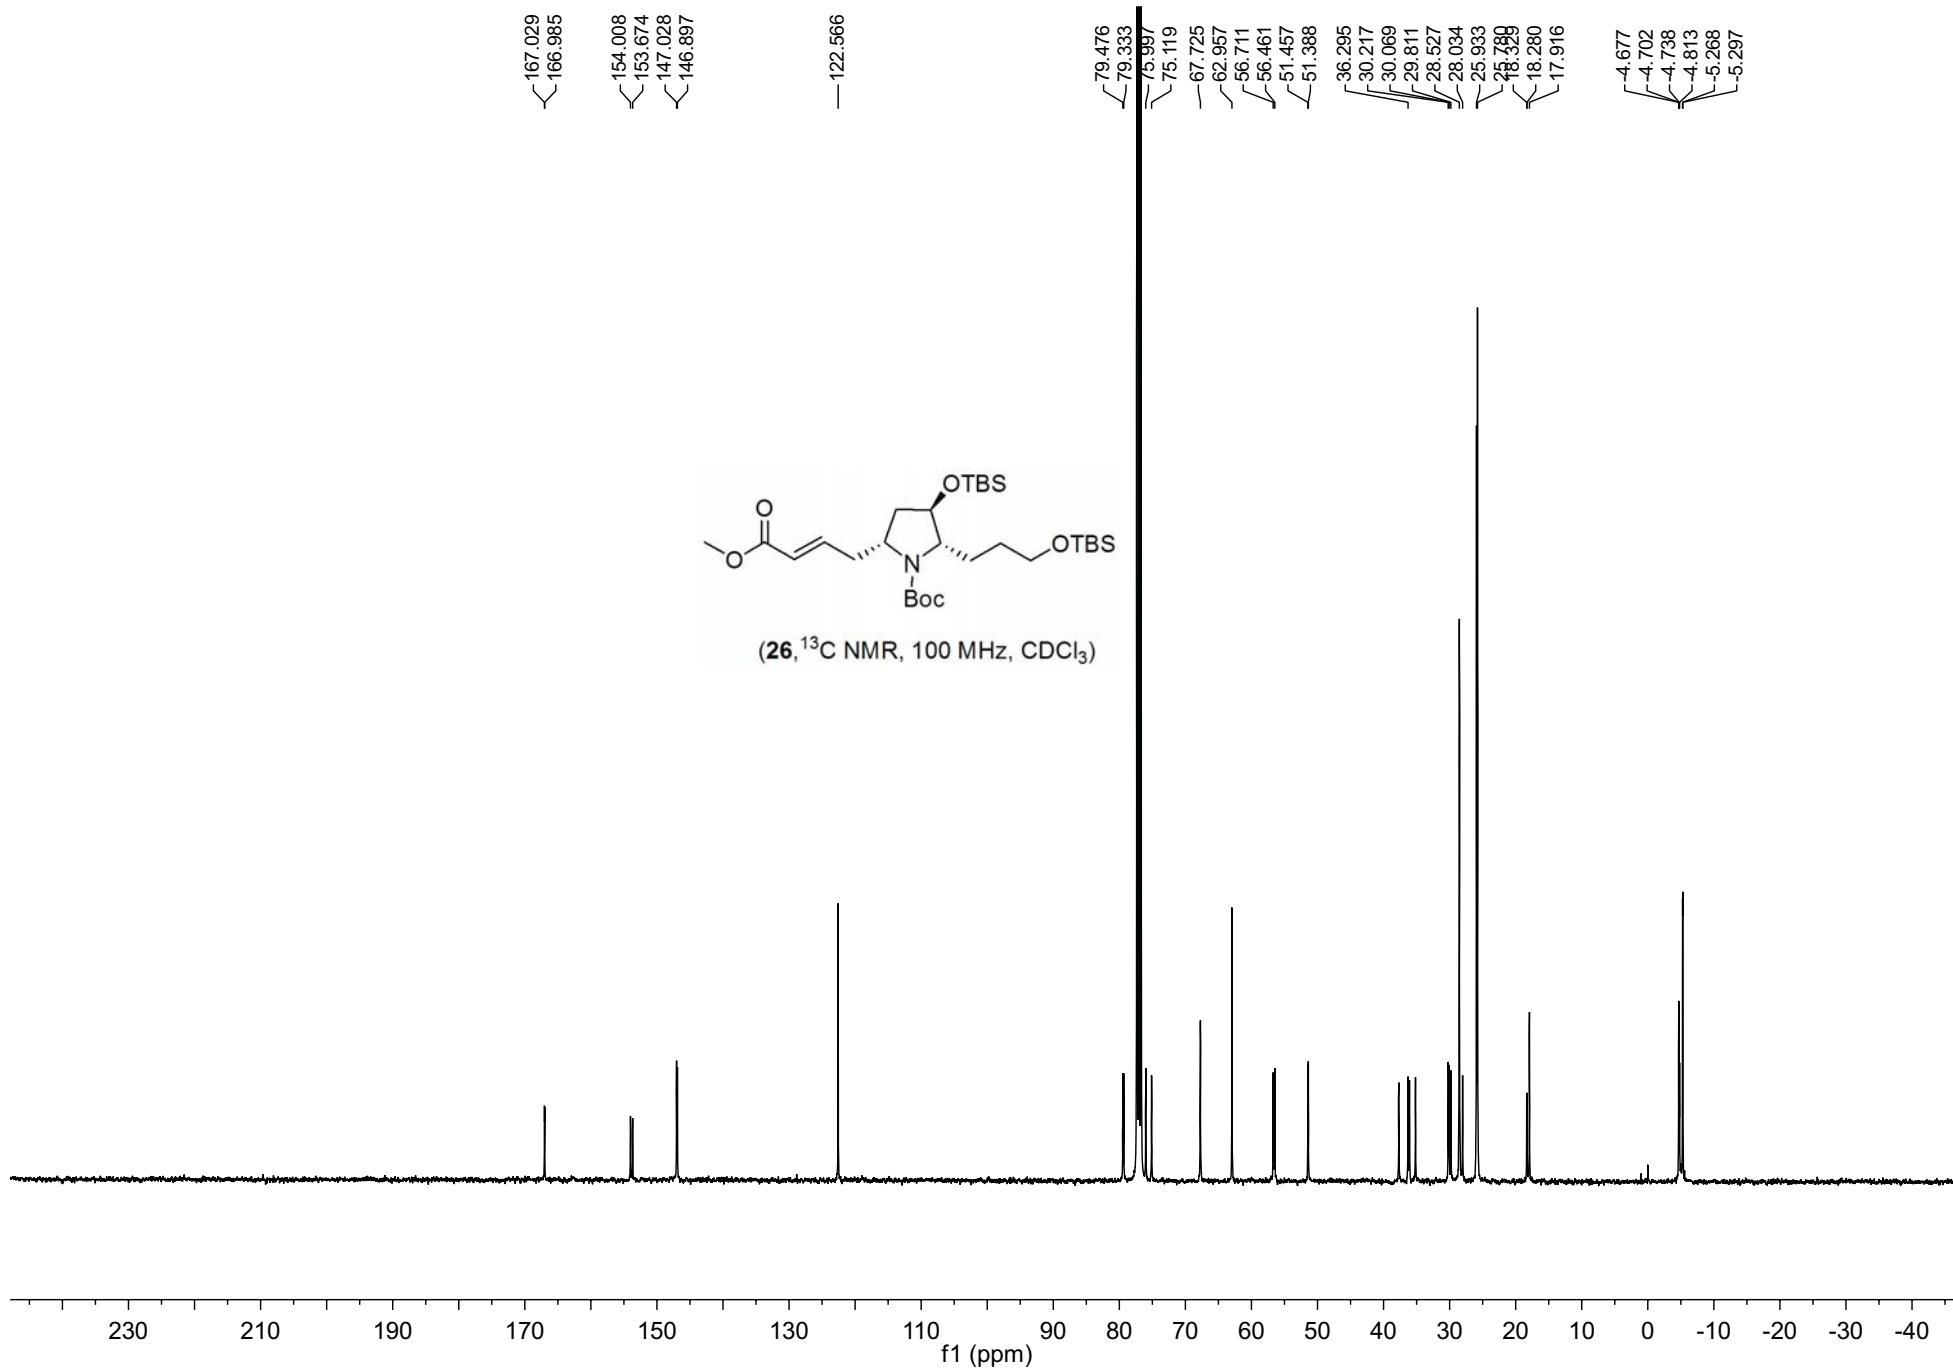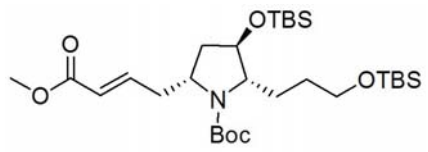

(**26**,  $^{13}\text{C}$  NMR, 100 MHz,  $\text{CDCl}_3$ )

—7.285

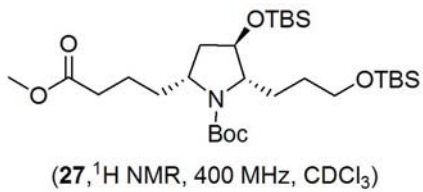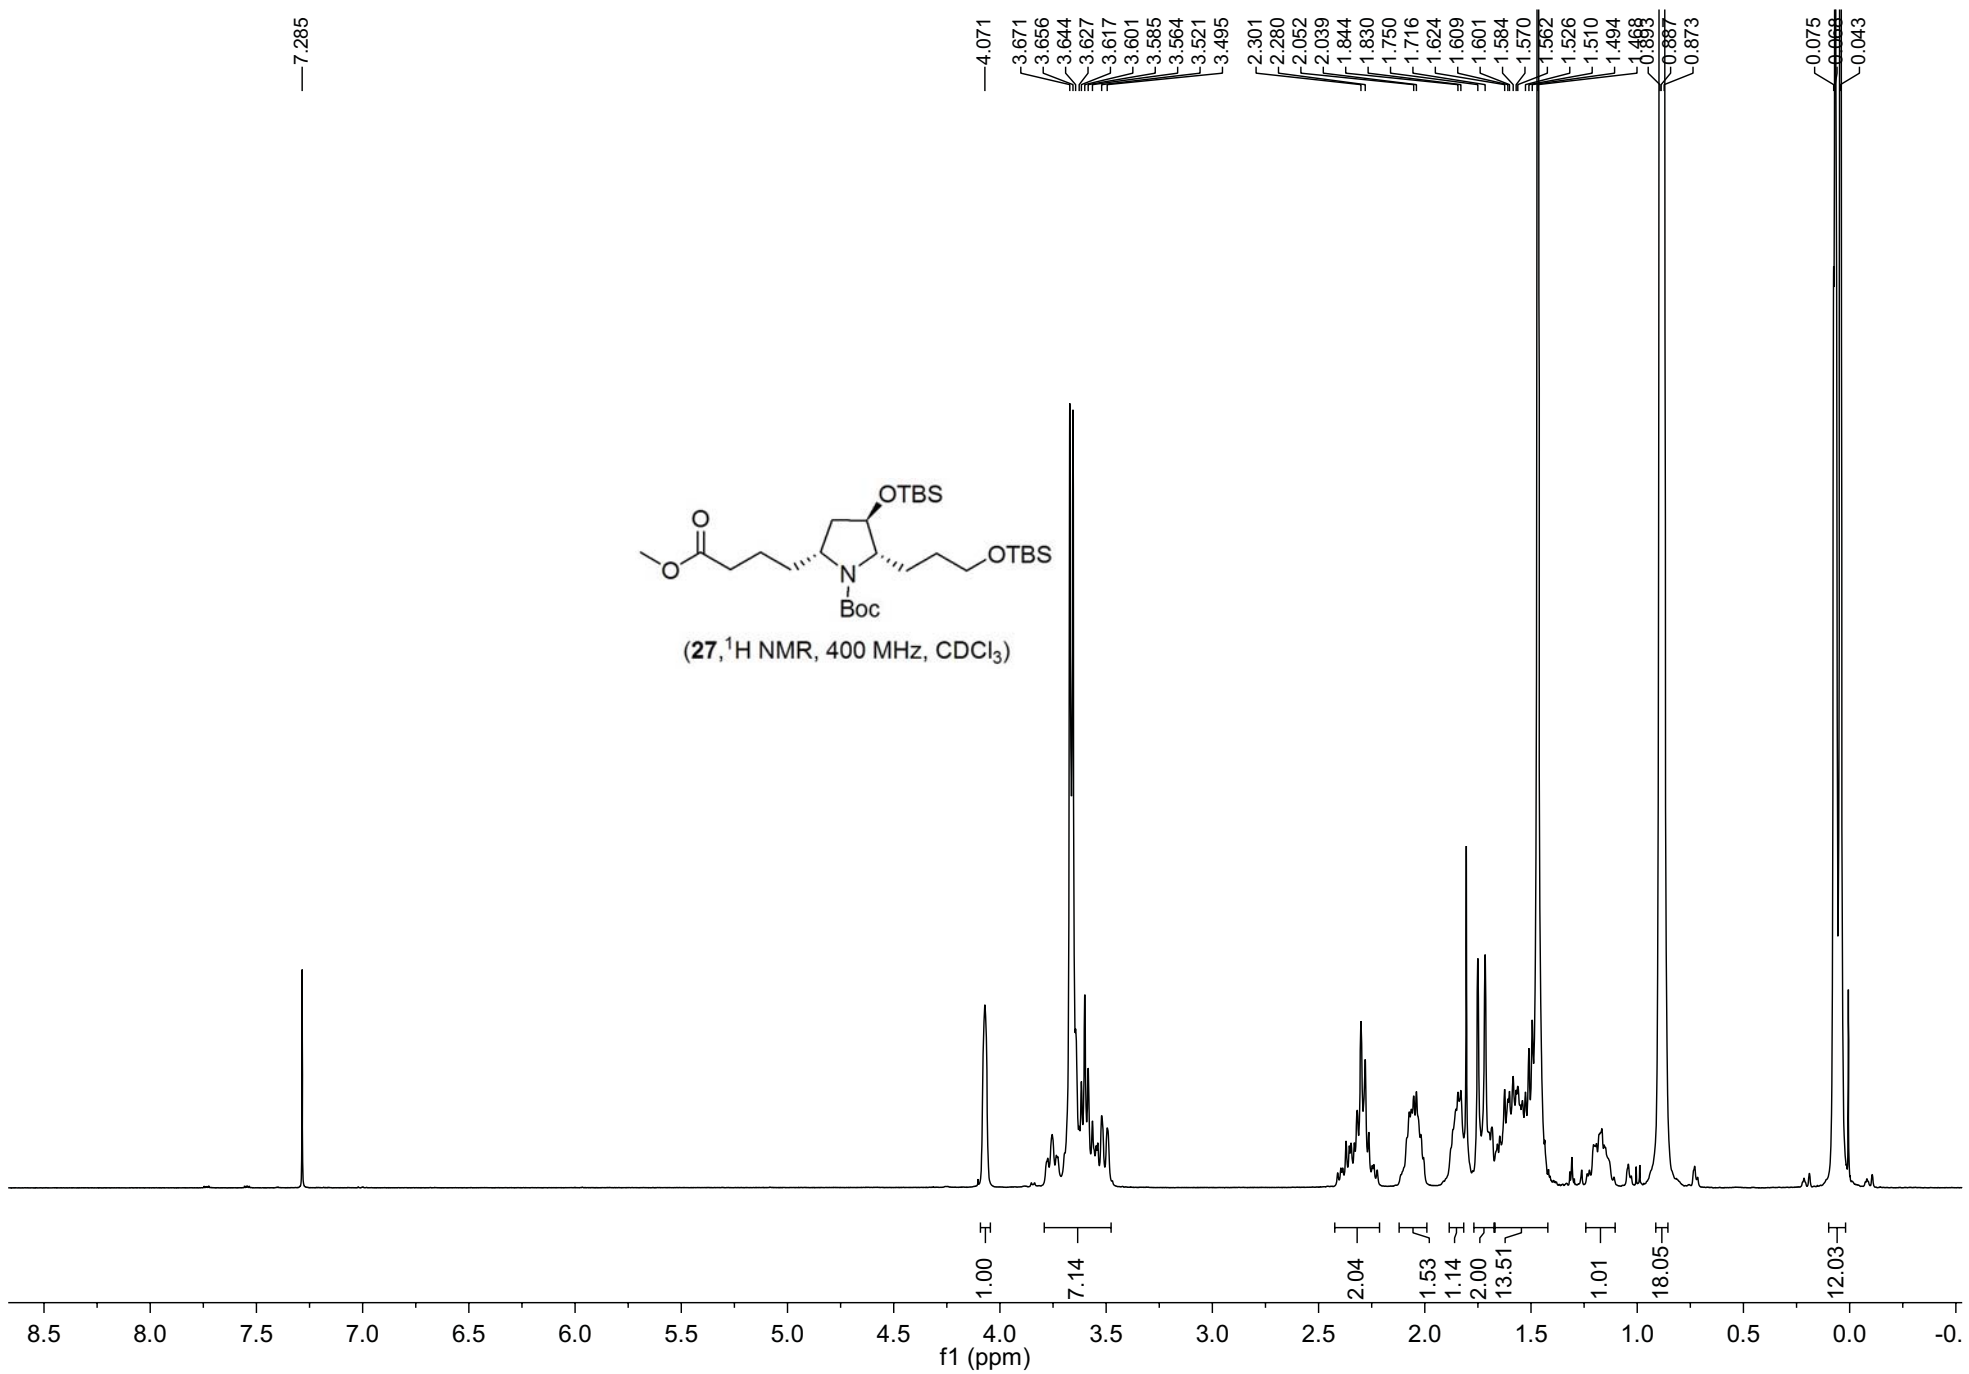

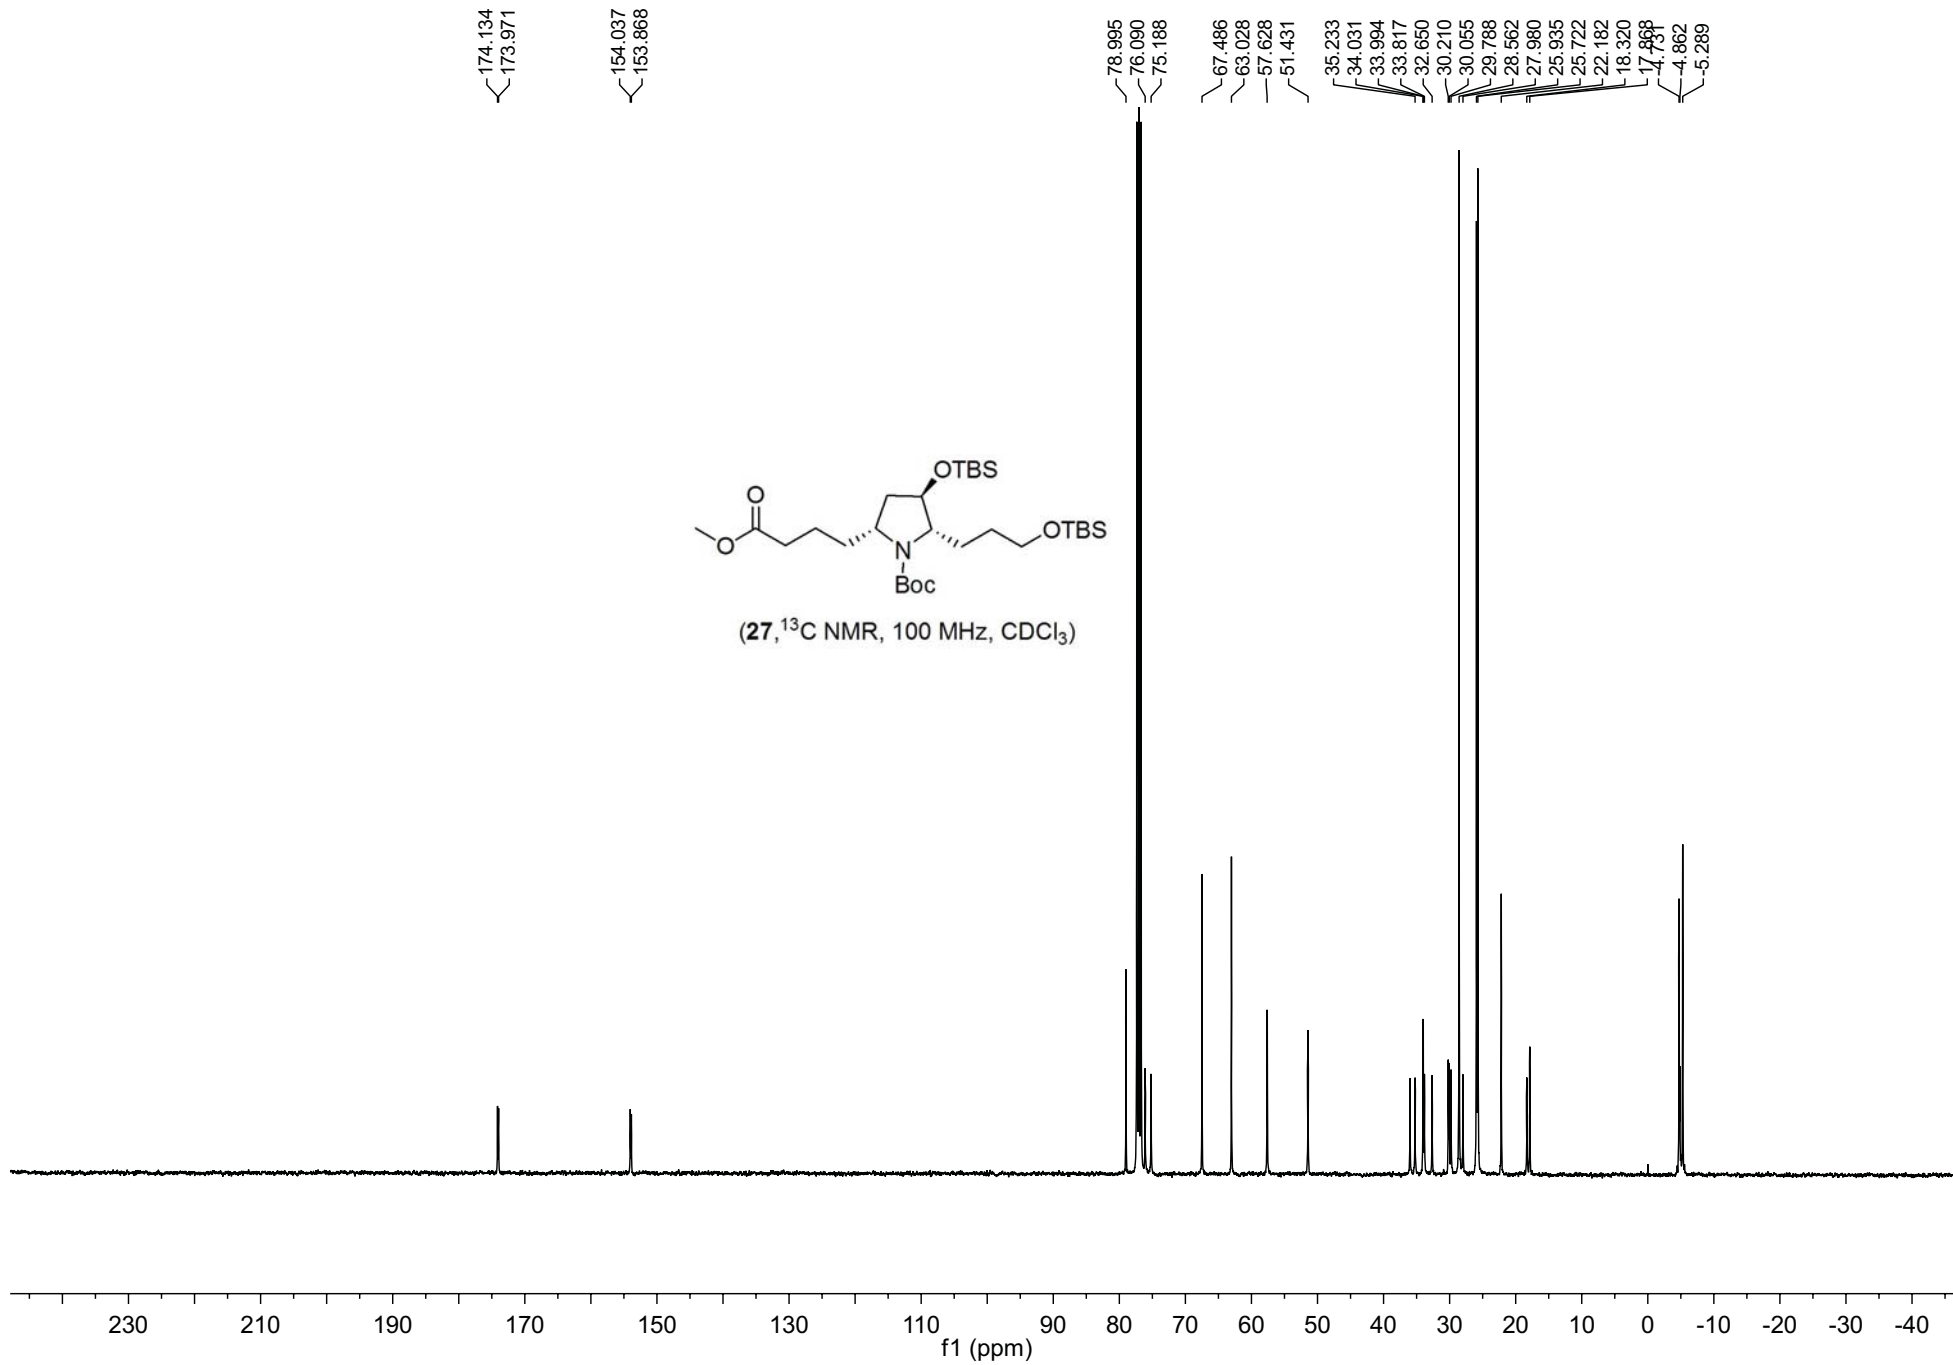

—7.285

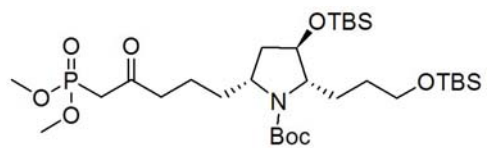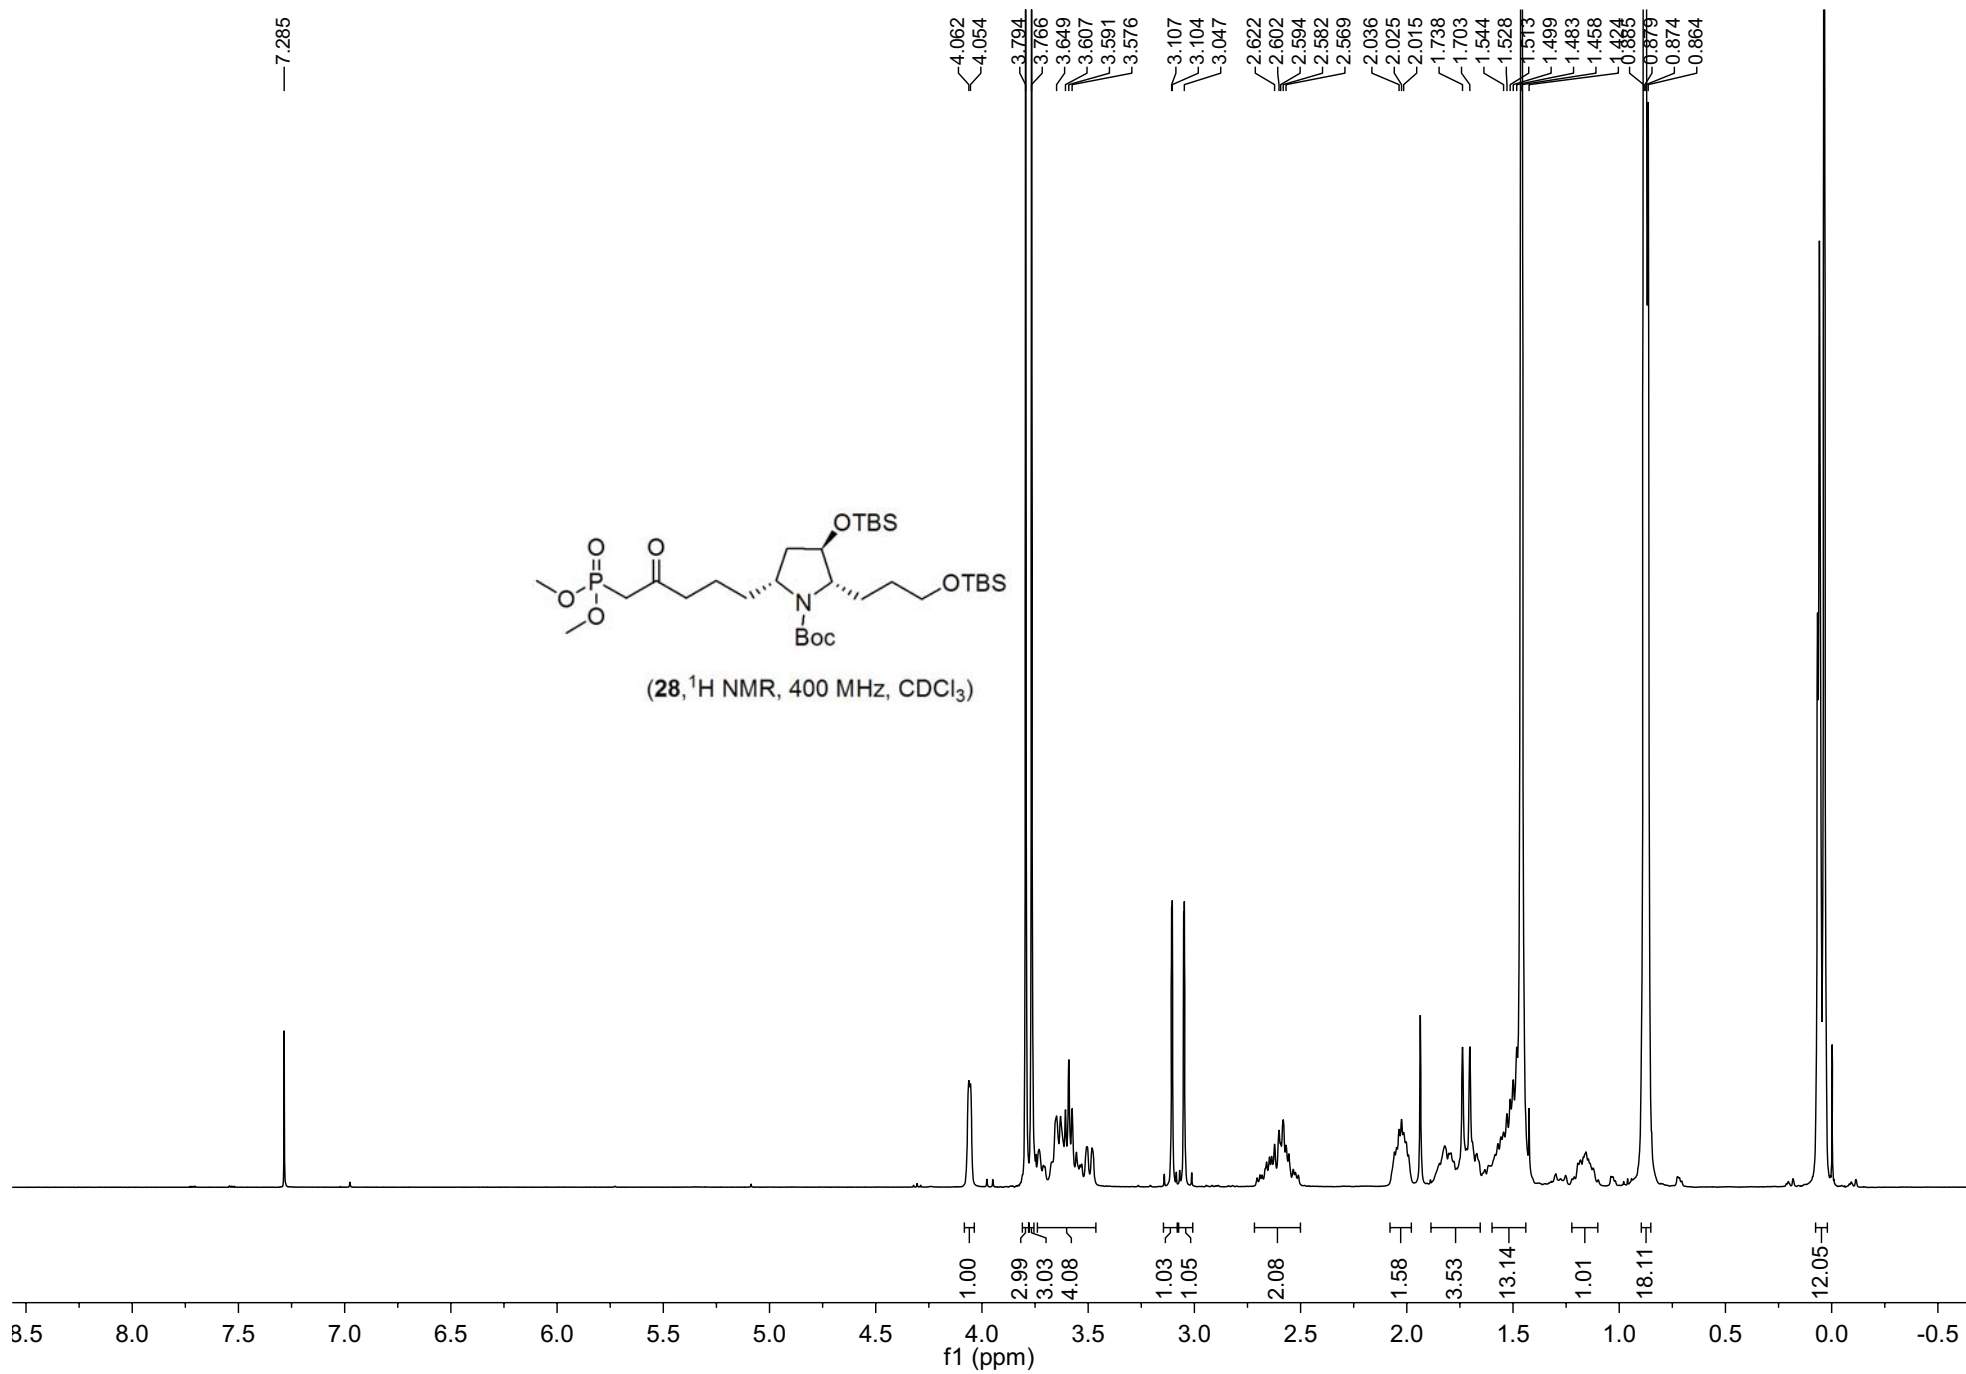

S100

201.849  
201.786  
201.498  
201.439

154.035  
153.861

79.004  
76.000  
75.183  
67.483  
63.011  
57.660  
57.590  
53.010  
52.946  
44.094  
44.000  
35.194  
32.262  
30.195  
30.045  
29.772  
28.550  
27.965  
25.930  
25.725  
20.514  
18.314  
17.975  
17.775  
4.863  
-5.299

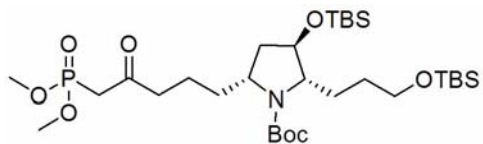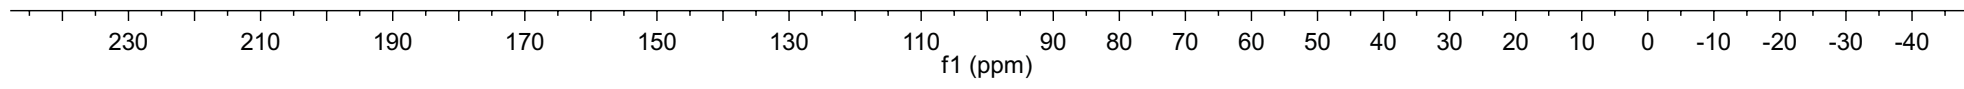

22.89  
22.73

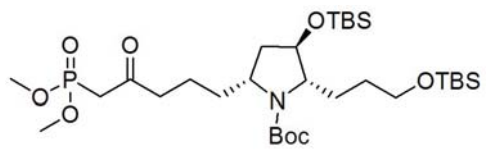

(28, <sup>31</sup>P NMR, 121.5 MHz, CDCl<sub>3</sub>)

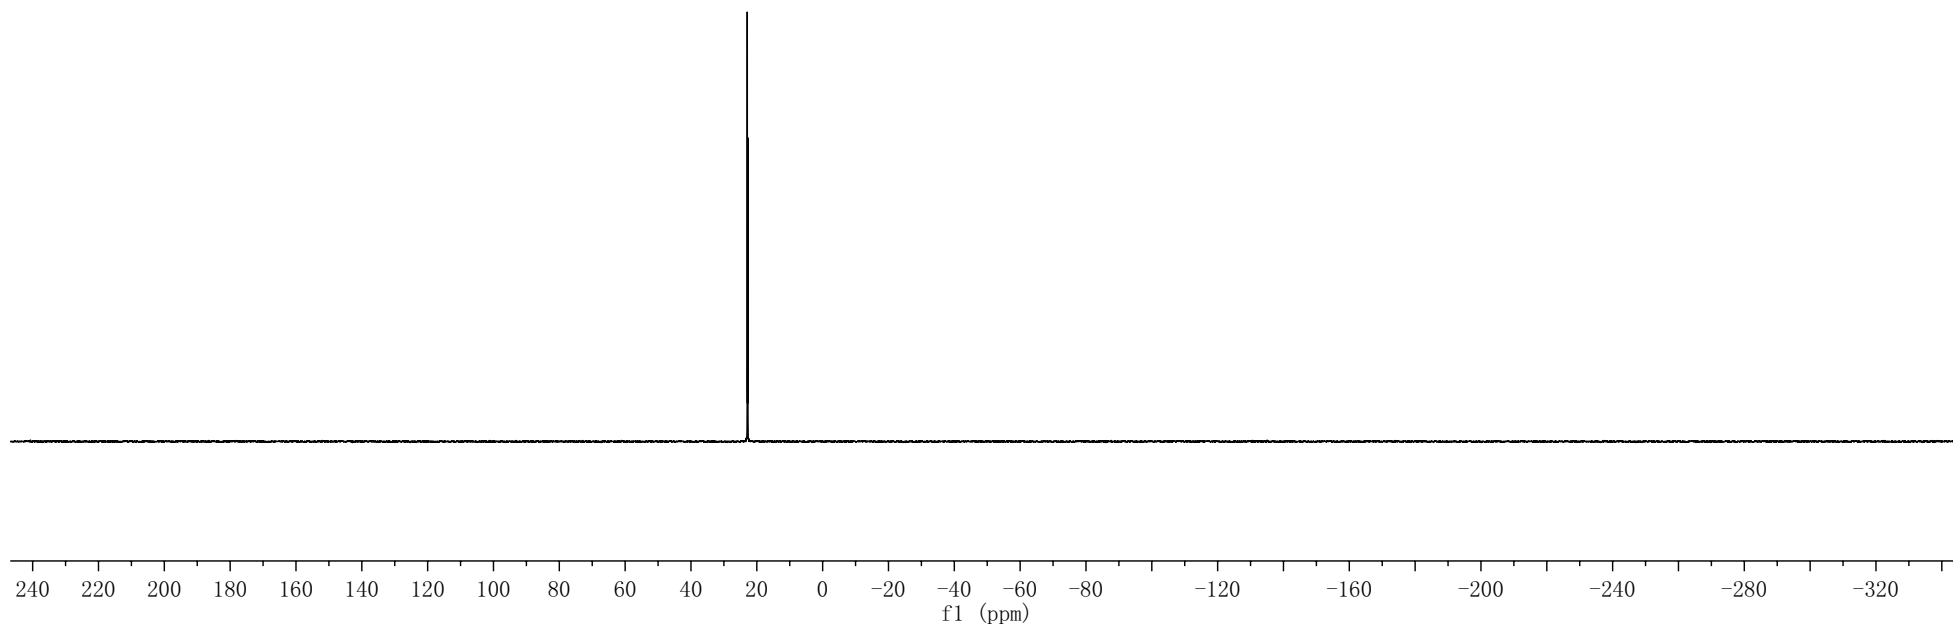

6.854  
6.837  
6.820  
6.815  
6.798  
6.780  
6.106  
6.087  
6.067  
6.047  
4.068  
3.782  
3.761  
3.741  
3.666  
3.652  
3.642  
3.627  
3.617  
3.602  
3.586  
3.564  
3.547  
3.539  
3.522  
3.497  
3.474  
2.644  
2.632  
2.617  
2.603  
2.591  
2.578  
2.546  
2.528  
2.514  
2.489  
2.473  
2.462  
2.448  
2.238  
2.222  
2.205  
2.188  
2.172  
2.076  
2.058  
2.043  
2.027  
1.994  
1.833  
1.821  
1.769  
1.735  
1.705  
1.692  
1.666  
1.655  
1.624  
1.606  
1.597  
1.583  
1.570  
1.555  
1.538  
1.527  
1.511  
1.495  
1.470  
1.436  
1.355  
1.319  
1.312  
1.262  
1.205  
1.192  
1.167  
1.156  
1.134  
0.920  
0.903  
0.895  
0.889  
0.882  
0.875  
0.074  
0.066  
0.045

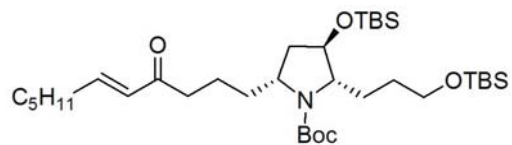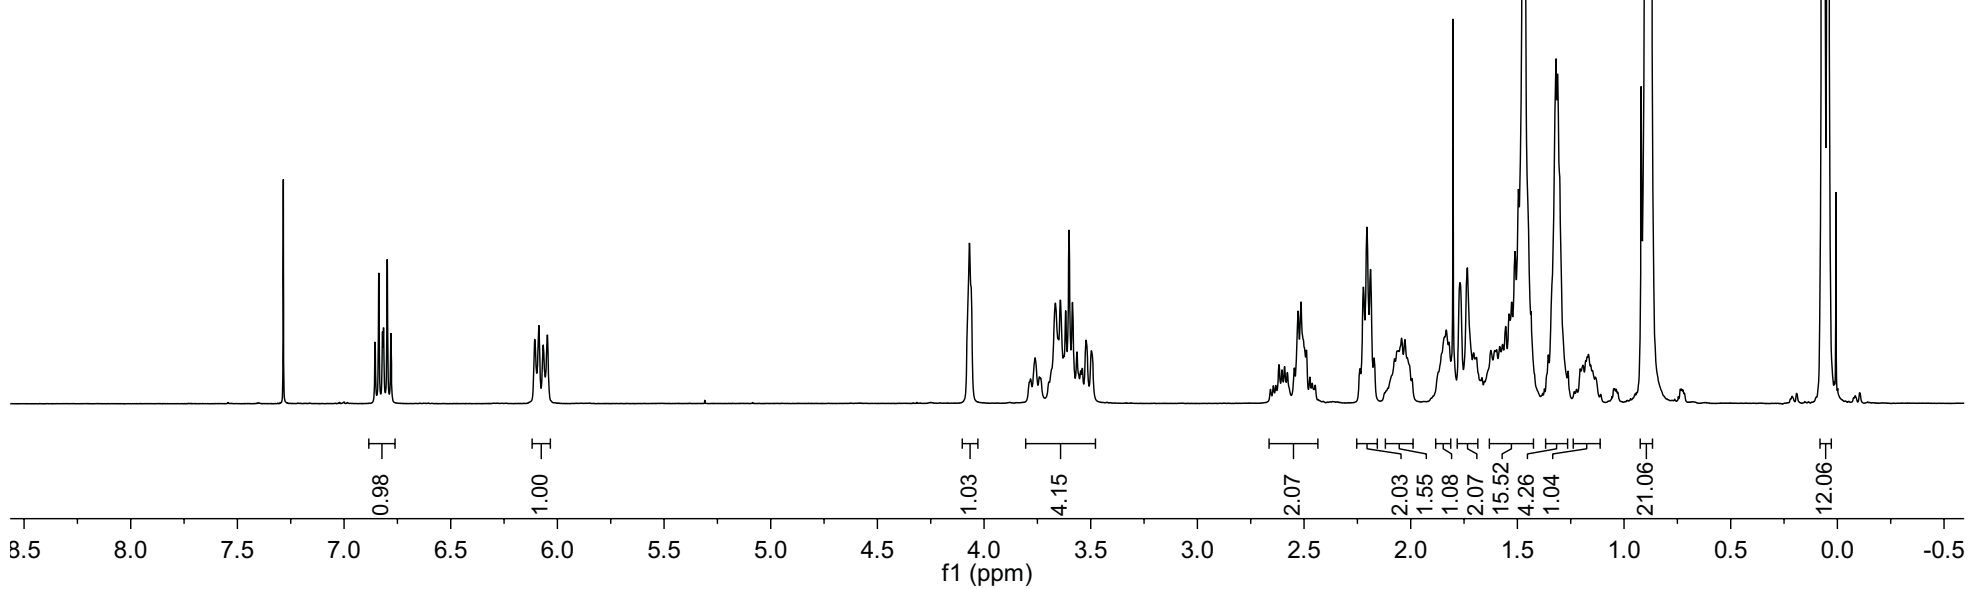

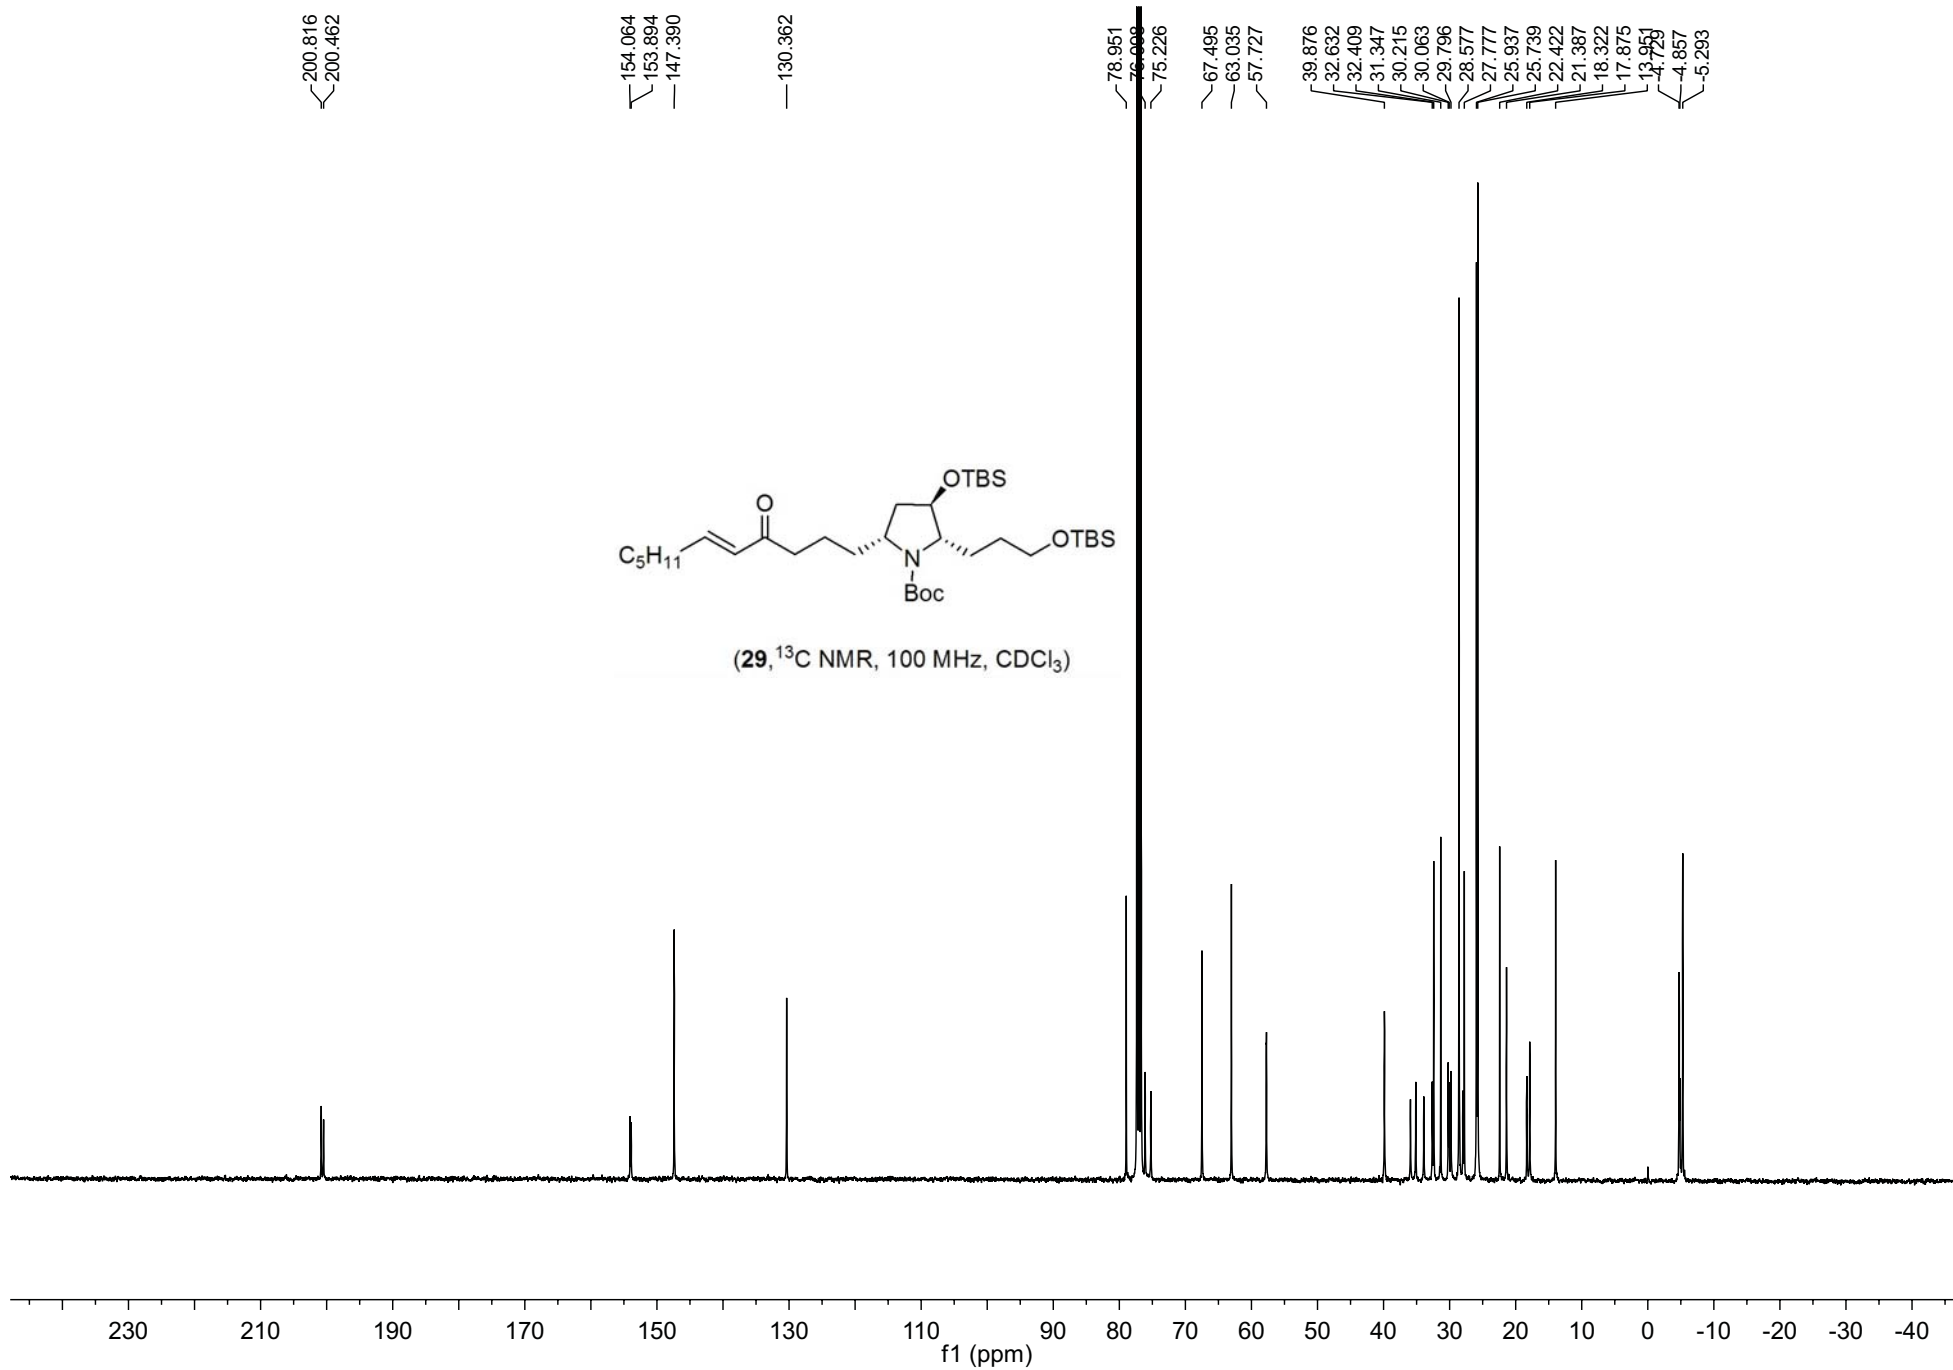



6.858  
6.841  
6.823  
6.818  
6.801  
6.784  
6.108  
6.089  
6.068  
6.050  
4.083  
4.074  
4.036  
4.026  
3.760  
3.730  
3.704  
3.693  
3.678  
3.658  
3.649  
3.555  
3.533  
2.913  
2.617  
2.603  
2.590  
2.577  
2.547  
2.529  
2.517  
2.510  
2.500  
2.475  
2.241  
2.223  
2.206  
2.190  
2.108  
2.097  
2.087  
2.075  
2.064  
2.053  
2.042  
2.016  
1.914  
1.894  
1.872  
1.848  
1.833  
1.820  
1.808  
1.786  
1.752  
1.724  
1.697  
1.627  
1.613  
1.601  
1.584  
1.570  
1.561  
1.541  
1.511  
1.470  
1.436  
1.422  
1.357  
1.324  
1.316  
1.273  
1.263  
1.250  
1.231  
1.224  
1.215  
1.205  
1.196  
1.179  
1.033  
0.922  
0.905  
0.878  
0.070  
0.065  
0.008

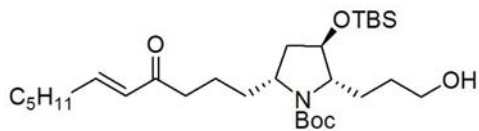

(30, <sup>1</sup>H NMR, 400 MHz, CDCl<sub>3</sub>)

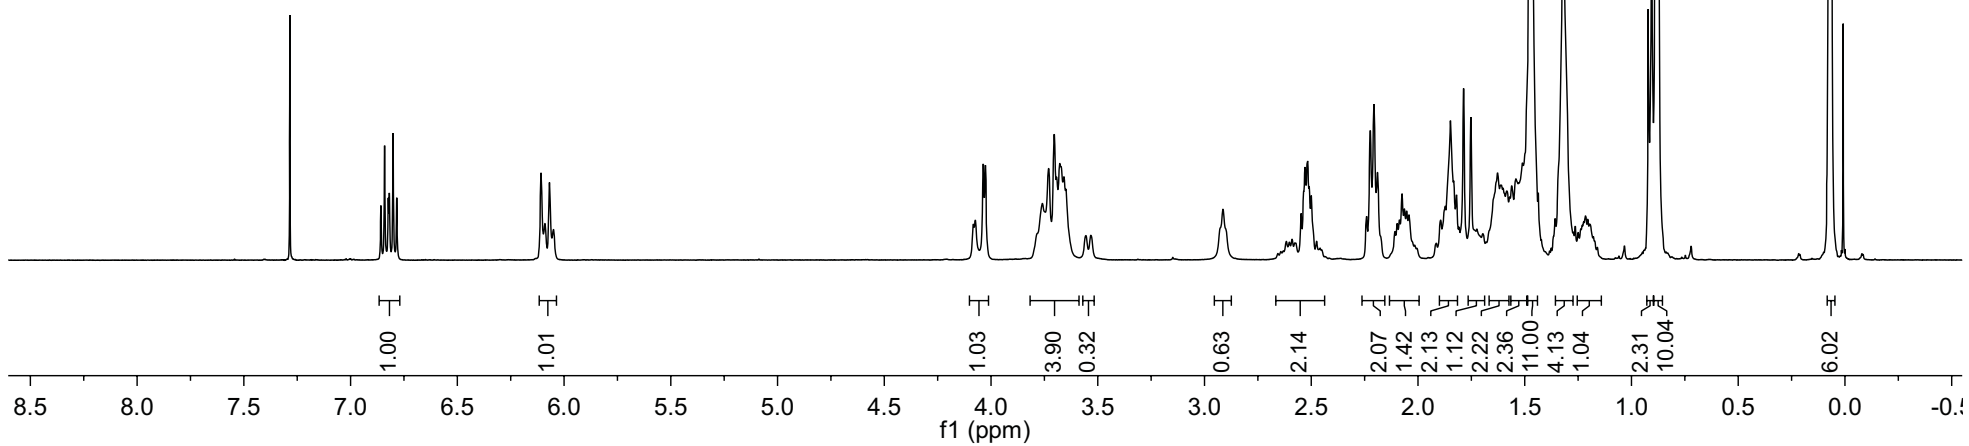

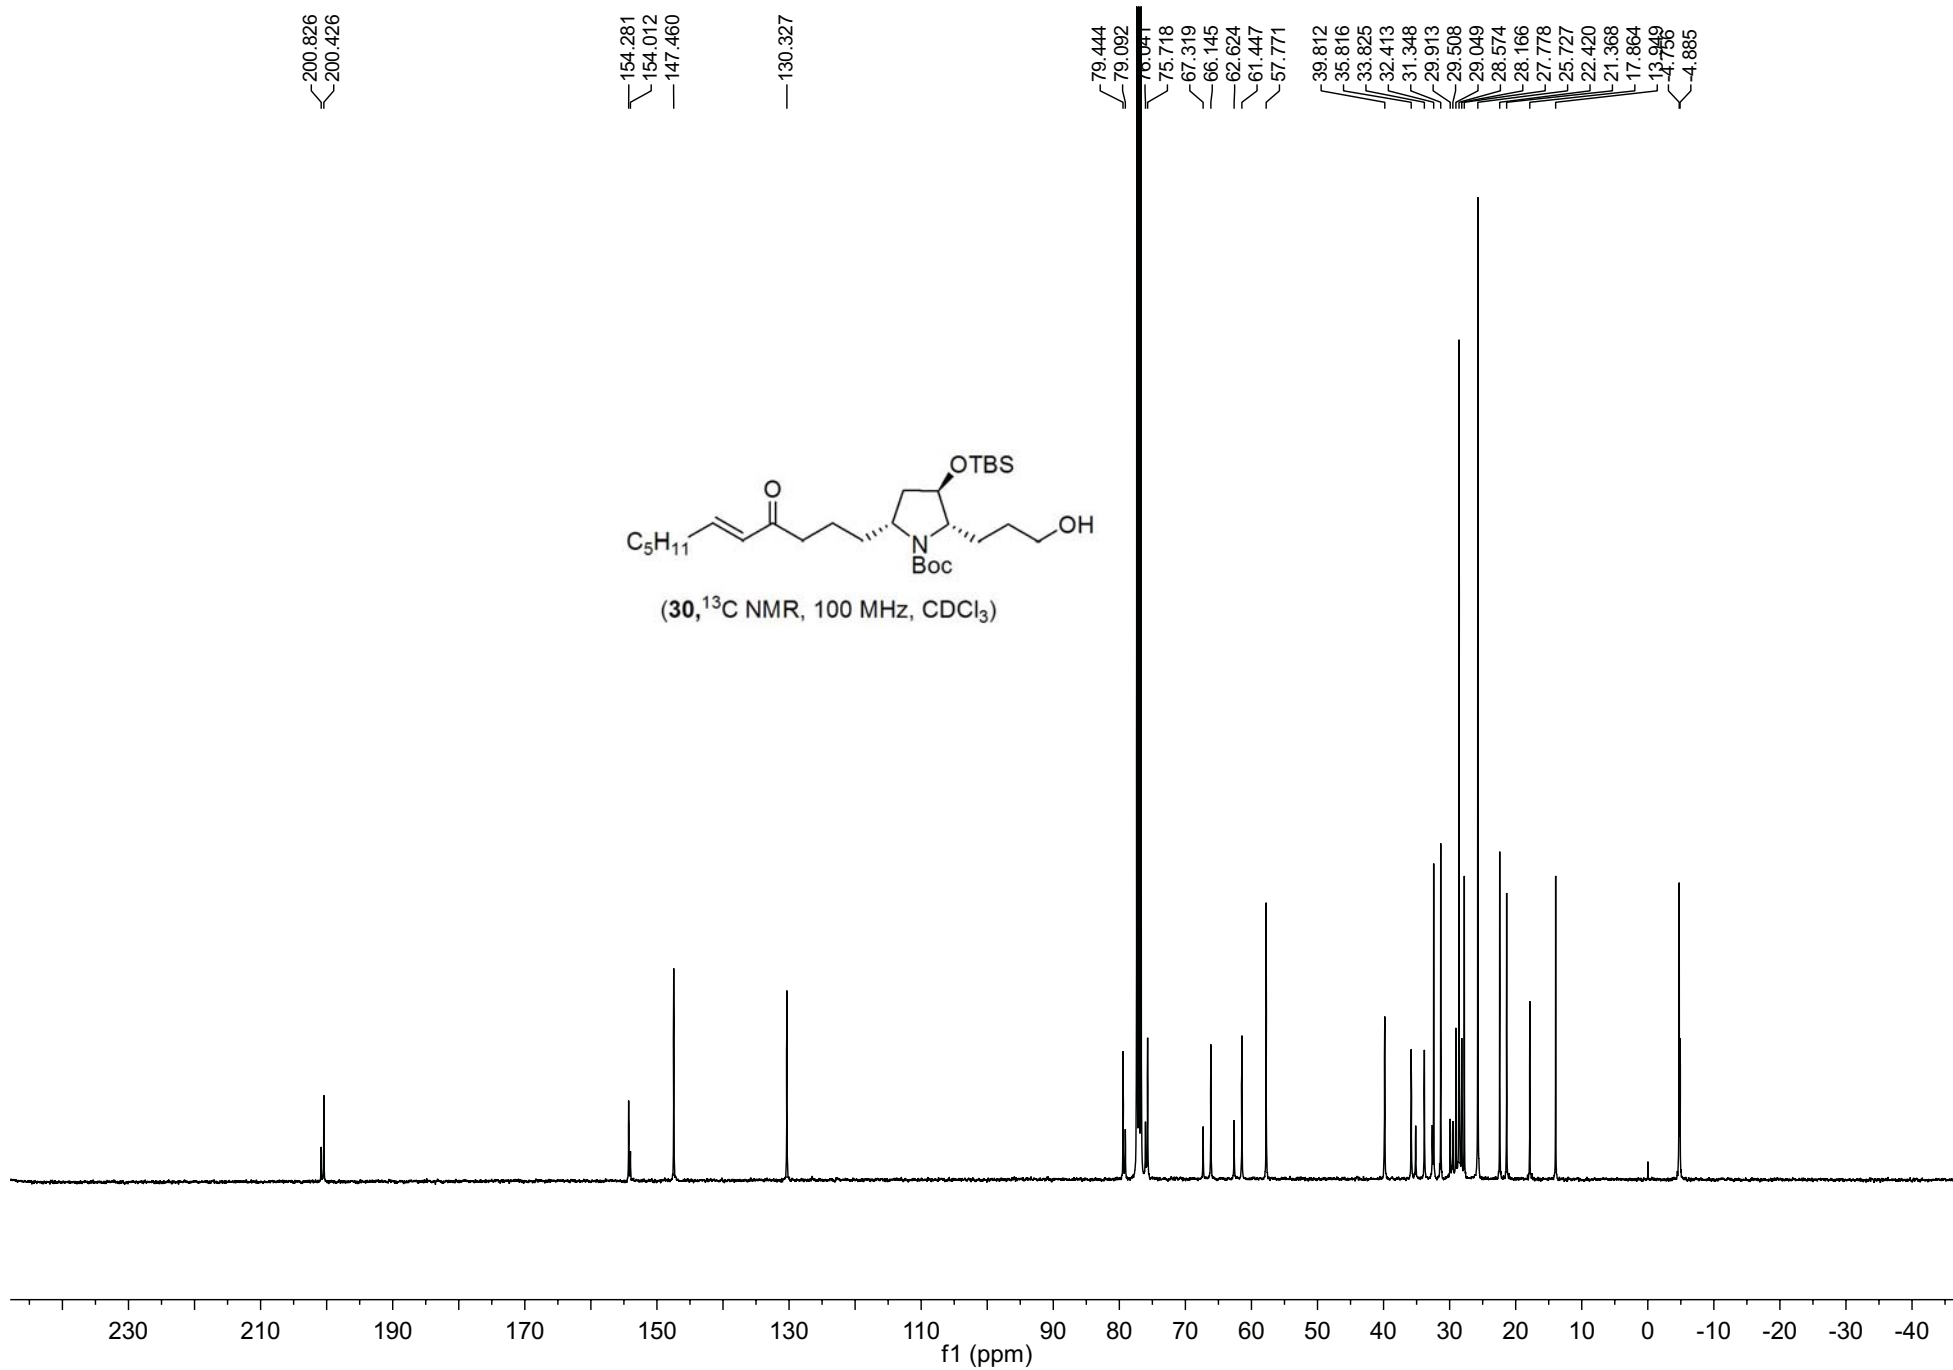

7.275  
6.863  
6.851  
6.840  
6.837  
6.825  
6.813  
6.091  
6.064  
4.087  
4.076  
4.067  
4.056  
3.835  
3.826  
3.278  
3.265  
3.253  
3.246  
3.234  
2.897  
2.880  
2.869  
2.859  
2.850  
2.840  
2.501  
2.489  
2.483  
2.477  
2.472  
2.461  
2.451  
2.441  
2.432  
1.972  
1.960  
1.949  
1.939  
1.928  
1.916  
1.905  
1.881  
1.863  
1.859  
1.850  
1.842  
1.830  
1.822  
1.813  
1.804  
1.797  
1.769  
1.758  
1.746  
1.735  
1.724  
1.714  
1.714  
1.705  
1.698  
1.685  
1.674  
1.662  
1.657  
1.647  
1.640  
1.637  
1.629  
1.617  
1.492  
1.480  
1.468  
1.456  
1.444  
1.347  
1.342  
1.332  
1.321  
1.316  
1.311  
1.304  
1.298  
1.291  
0.909  
0.898  
0.887

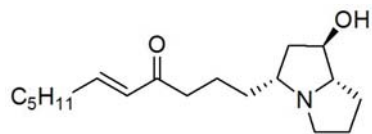

(*epi*-6,  $^1\text{H}$  NMR, 600 MHz,  $\text{CDCl}_3$ )

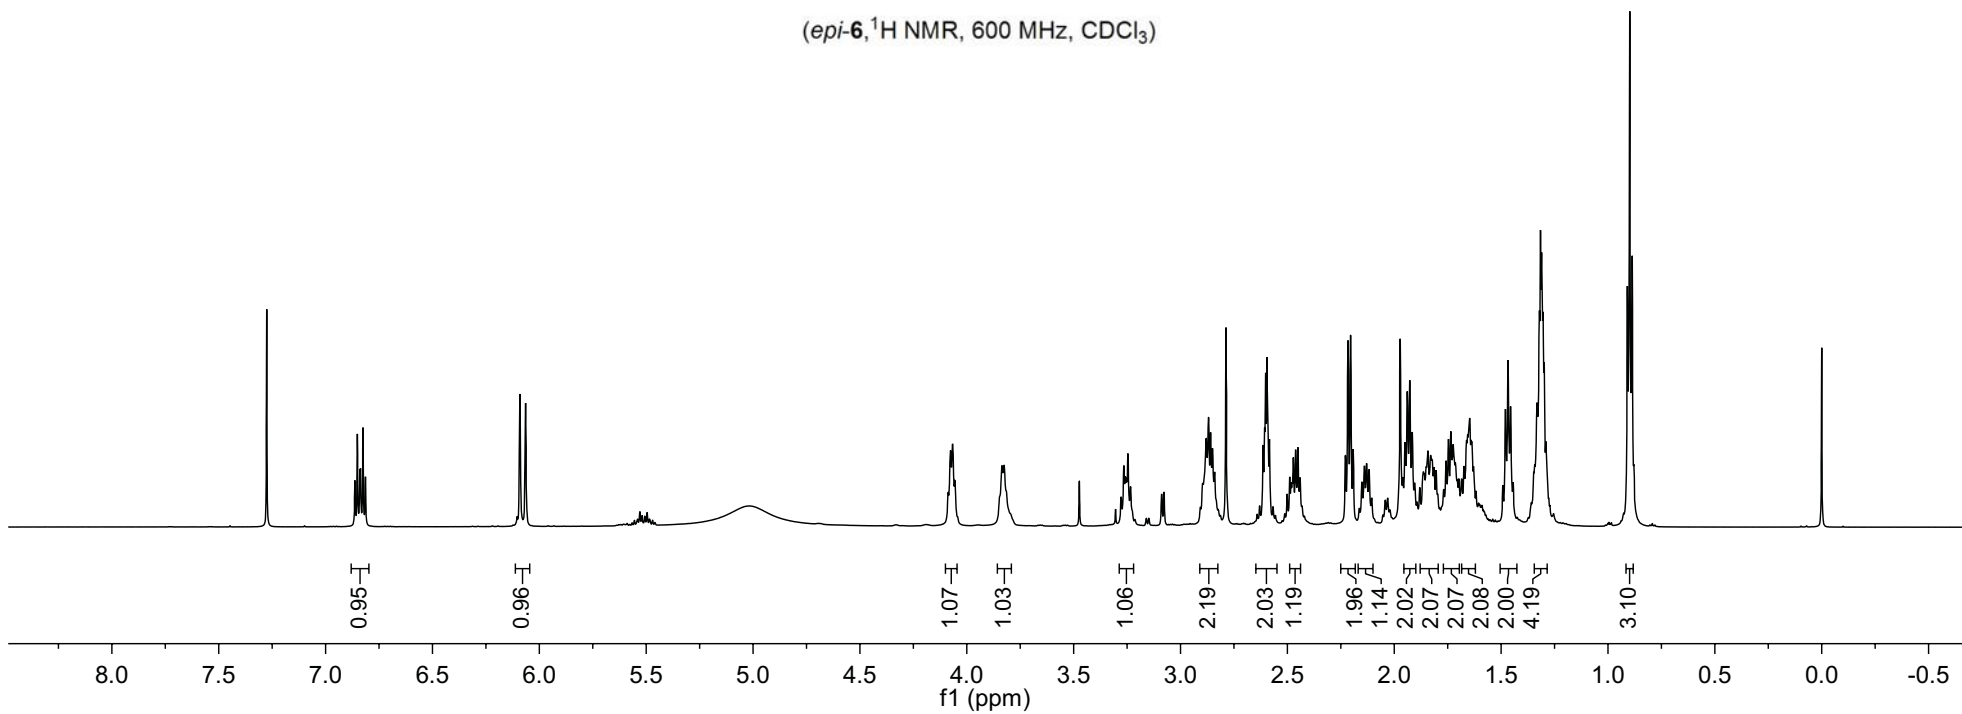

— 199.985

— 148.010

— 130.197

75.263  
73.162  
66.564

53.455  
40.946  
39.431  
33.492  
32.444  
31.362  
29.125  
27.750  
24.619  
22.411  
21.294  
13.939

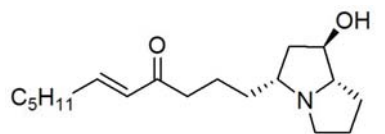

(*epi*-6,  $^{13}\text{C}$  NMR, 150 MHz,  $\text{CDCl}_3$ )

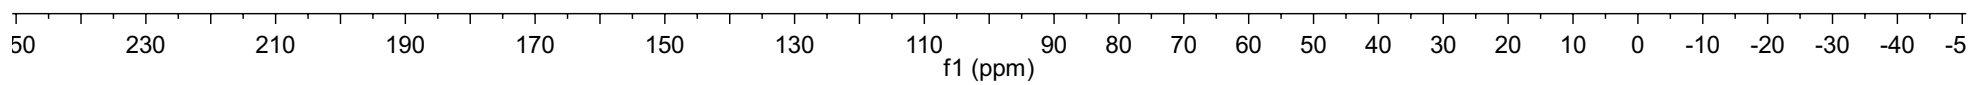

Supplement: c5qo00250h1.pdf [file c5qo00250h1.pdf]
